# Supplementary material for: miR-30b-5p inhibits proliferation, invasion, and migration of papillary thyroid cancer by targeting GALNT7 via the EGFR/PI3K/AKT pathway
Source: PubMed Central journal article supplement (PMC8611849; doi:10.1186/s12935-021-02323-x), 2021-11-24

Fig.3 (F)  
E-cadherin

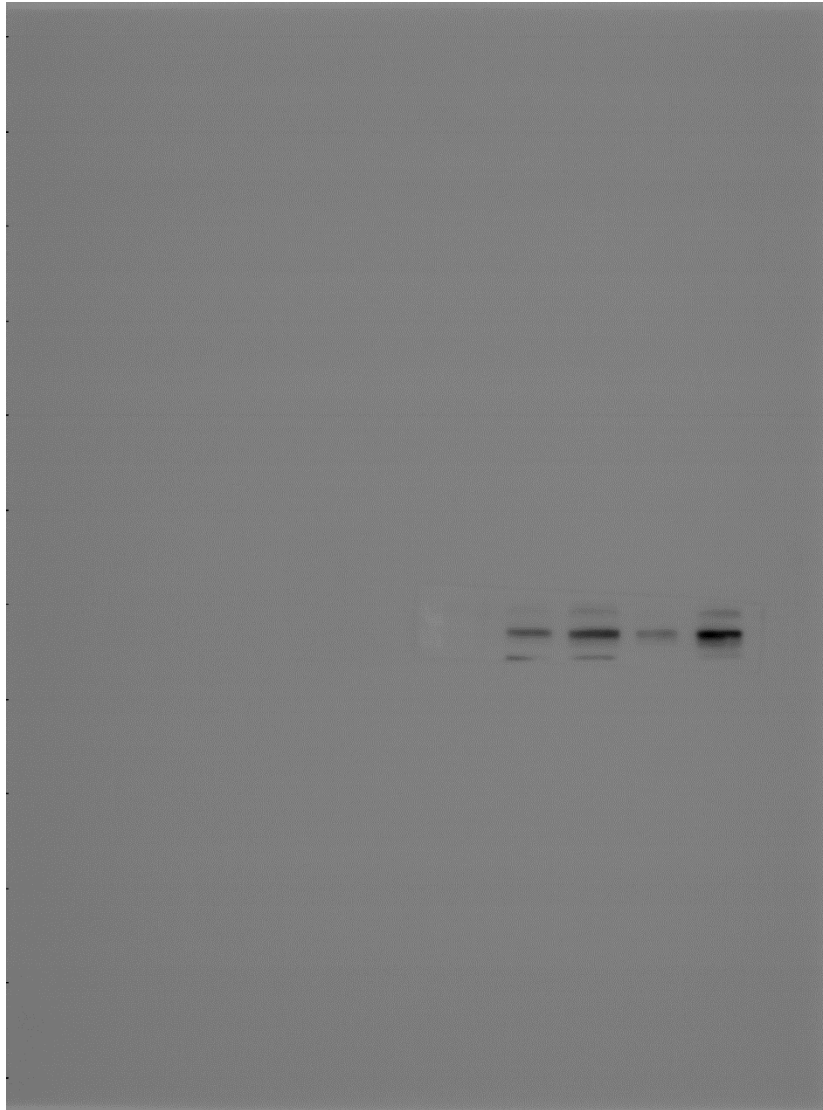

Vimentin

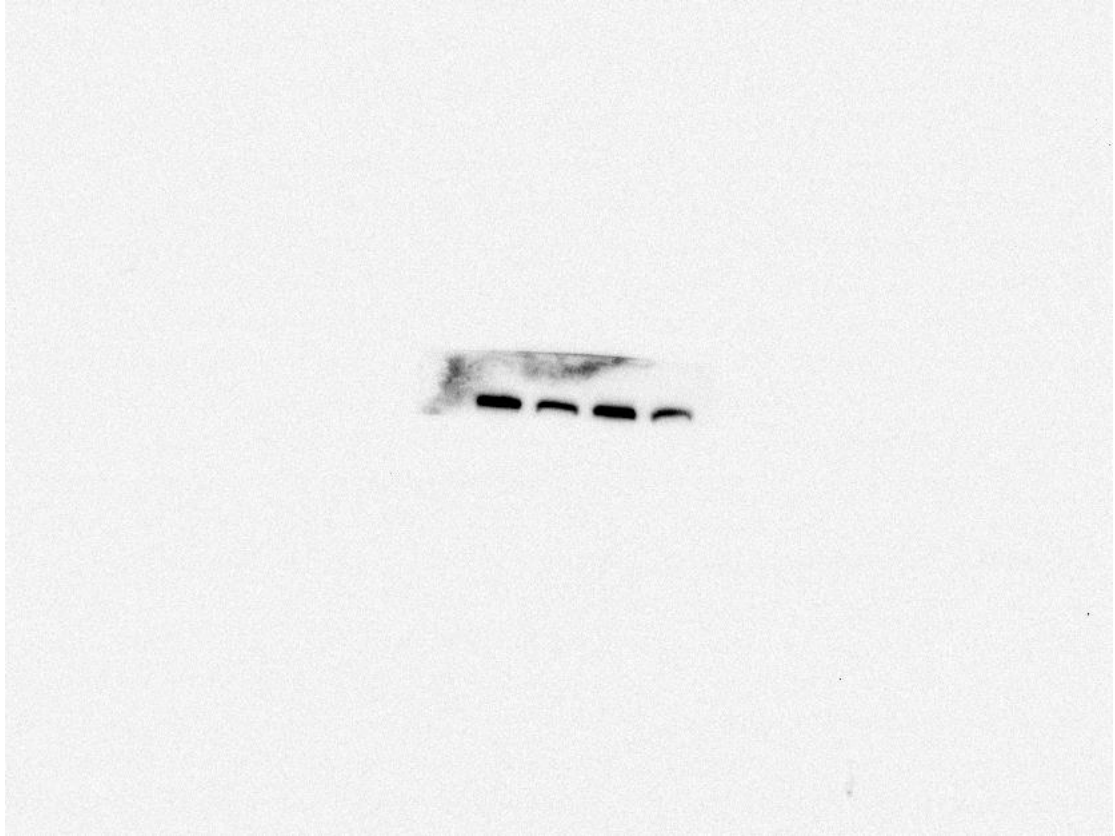

Snail

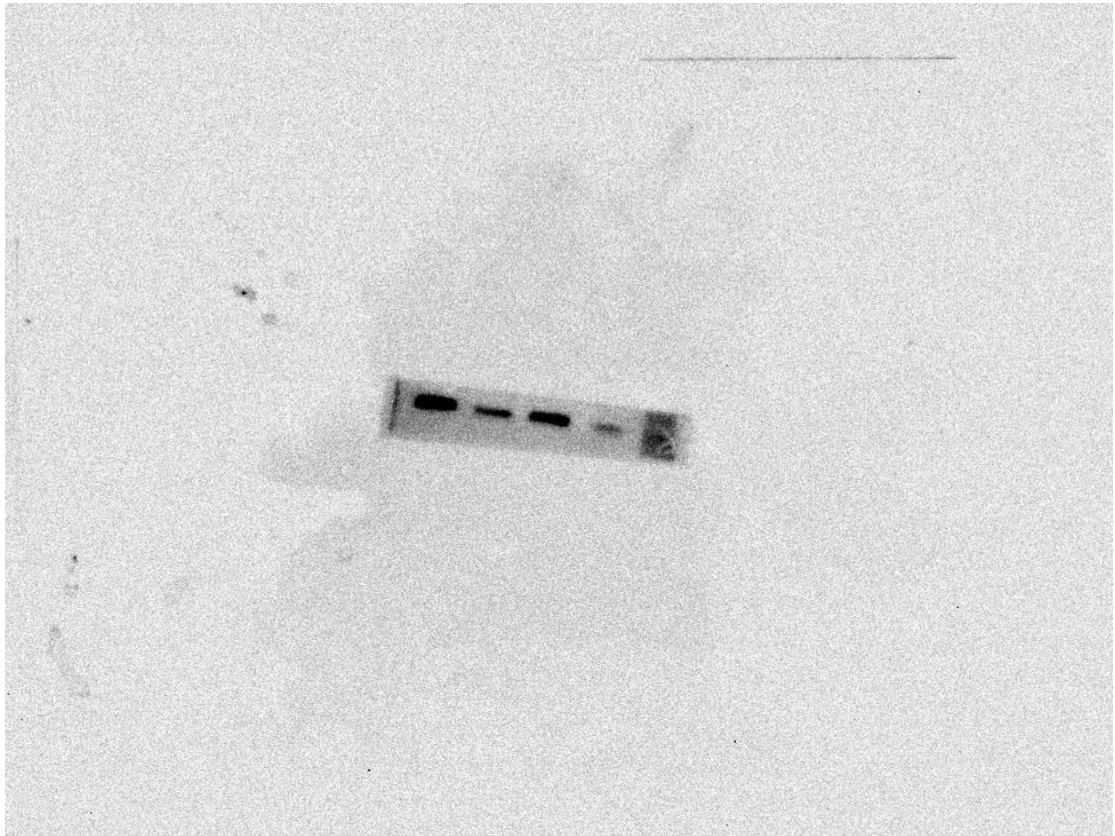

GAPDH

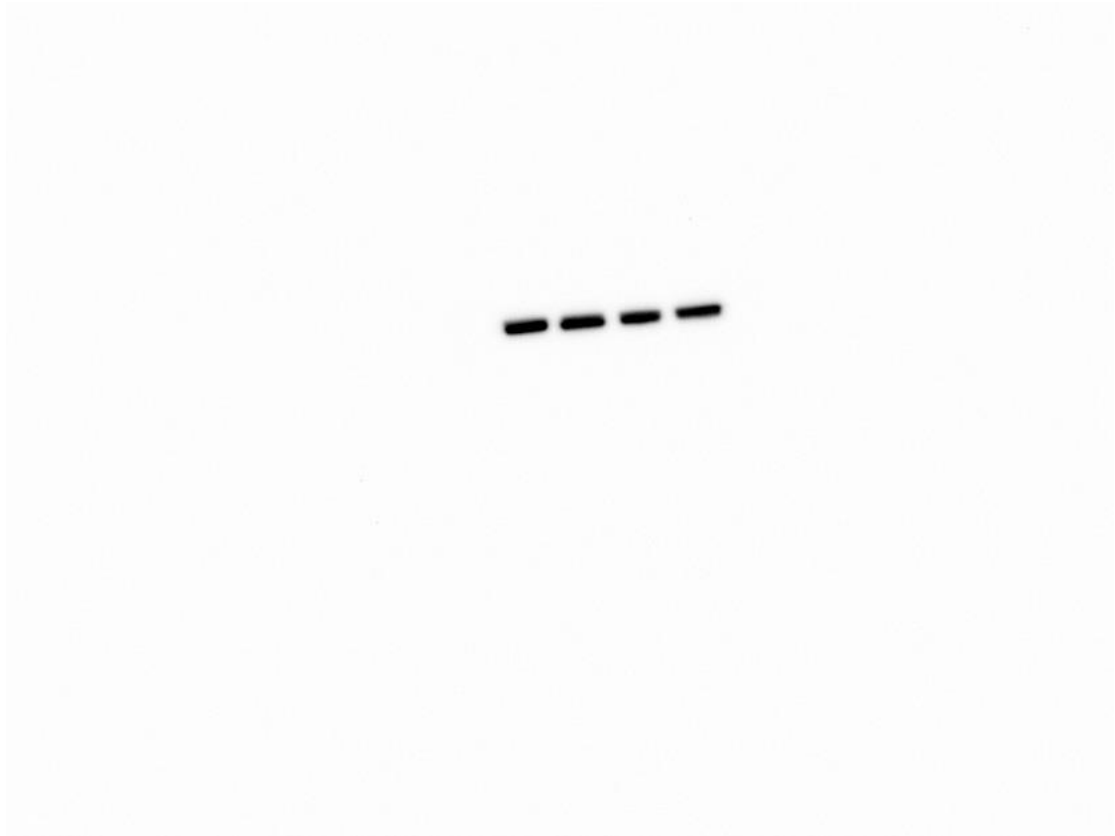

Fig.4 (C)  
GALNT7

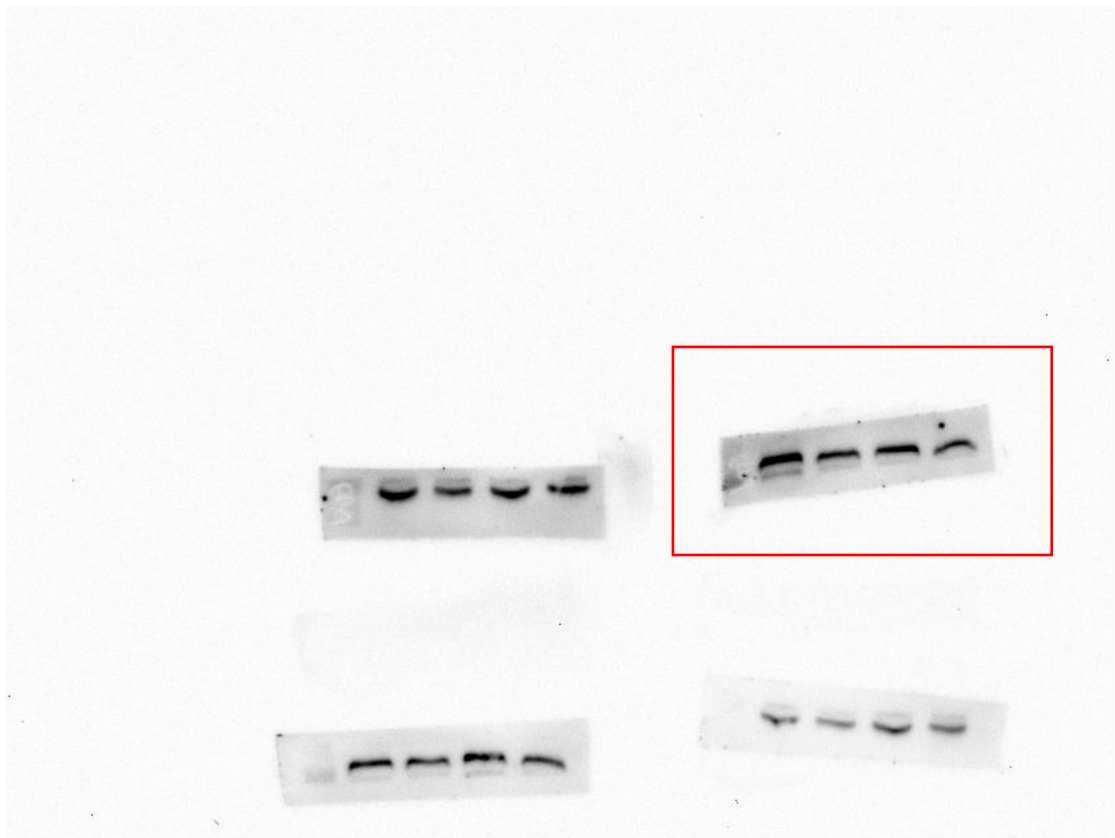

GAPDH

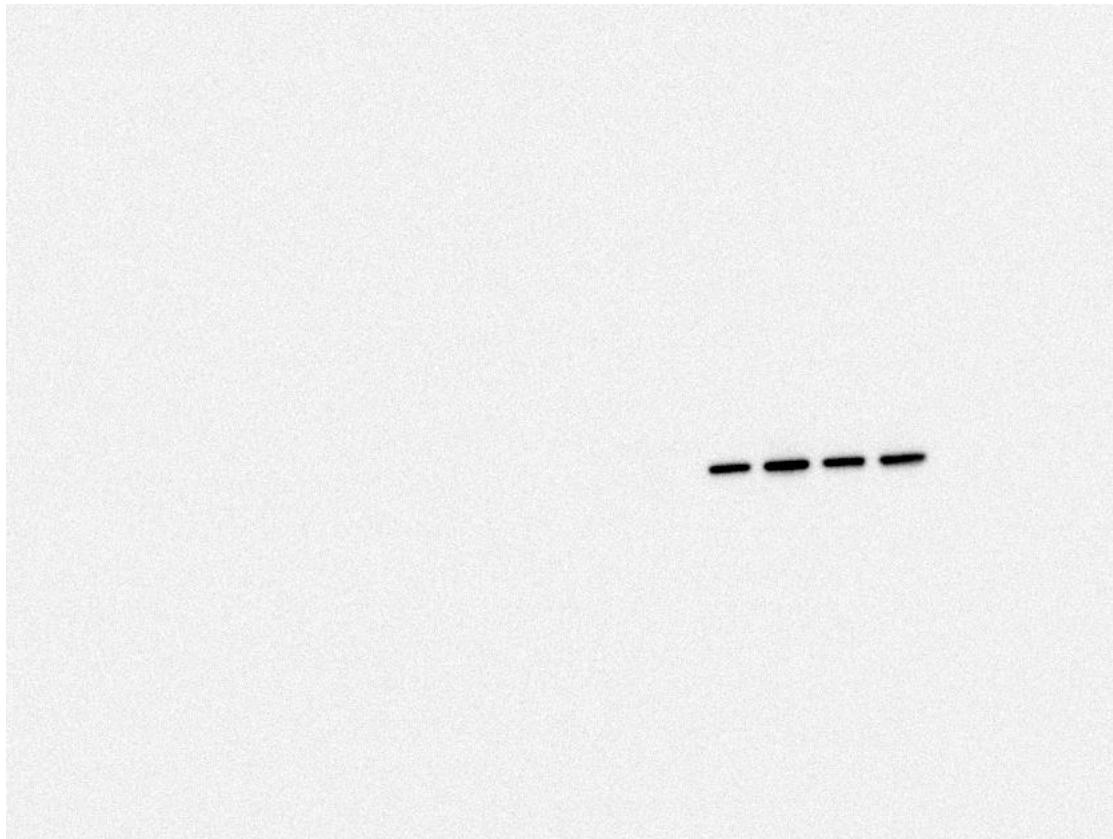

Fig.5 (B)

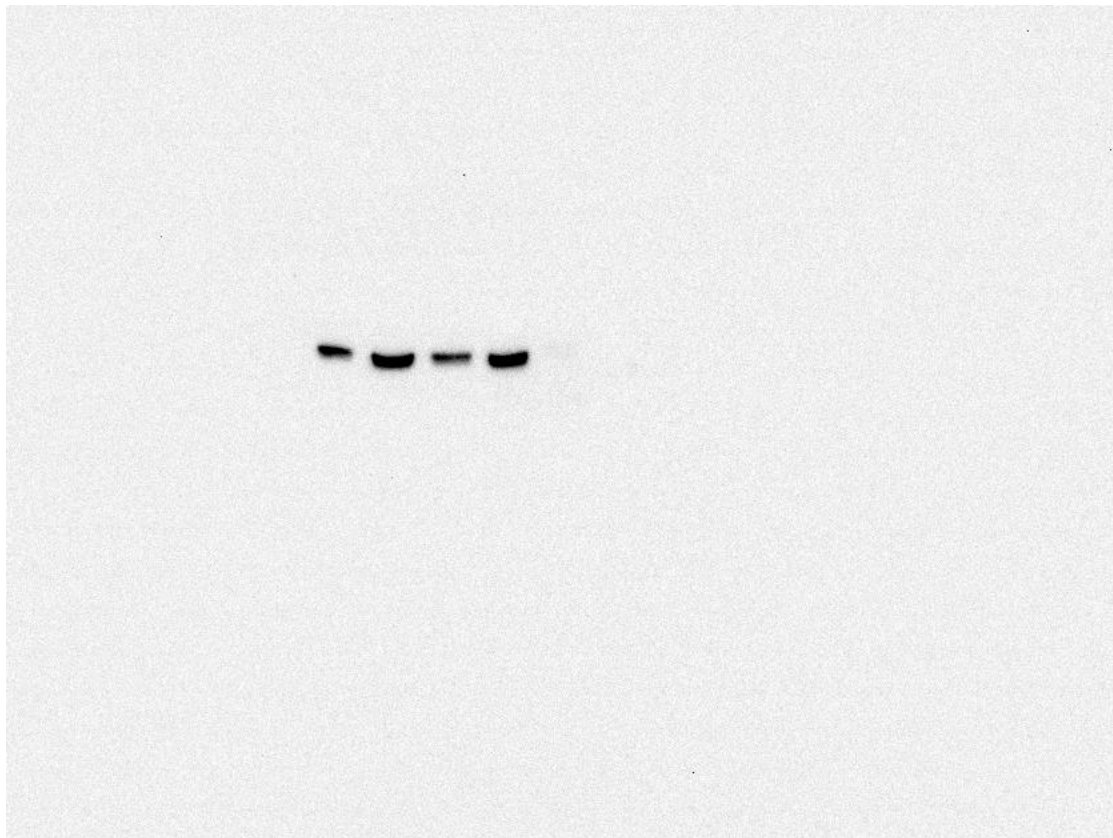



GAPDH

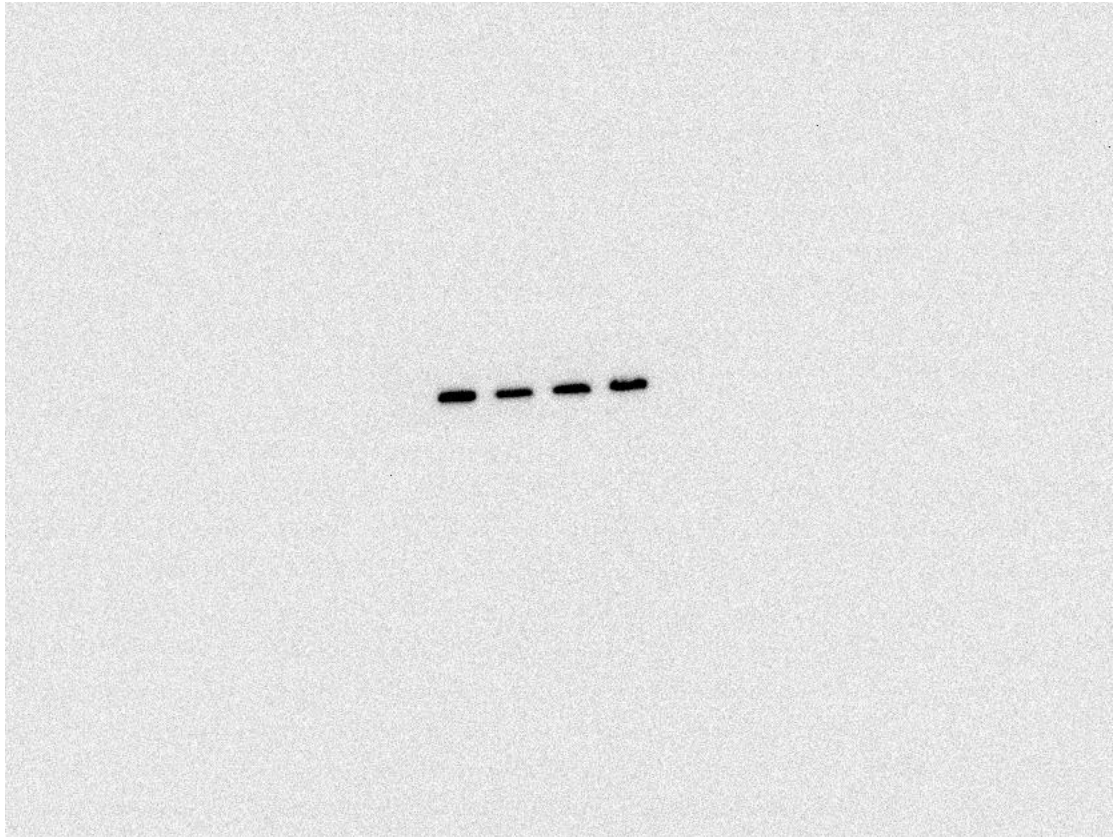

Fig.5(D)  
GALNT7(K1)

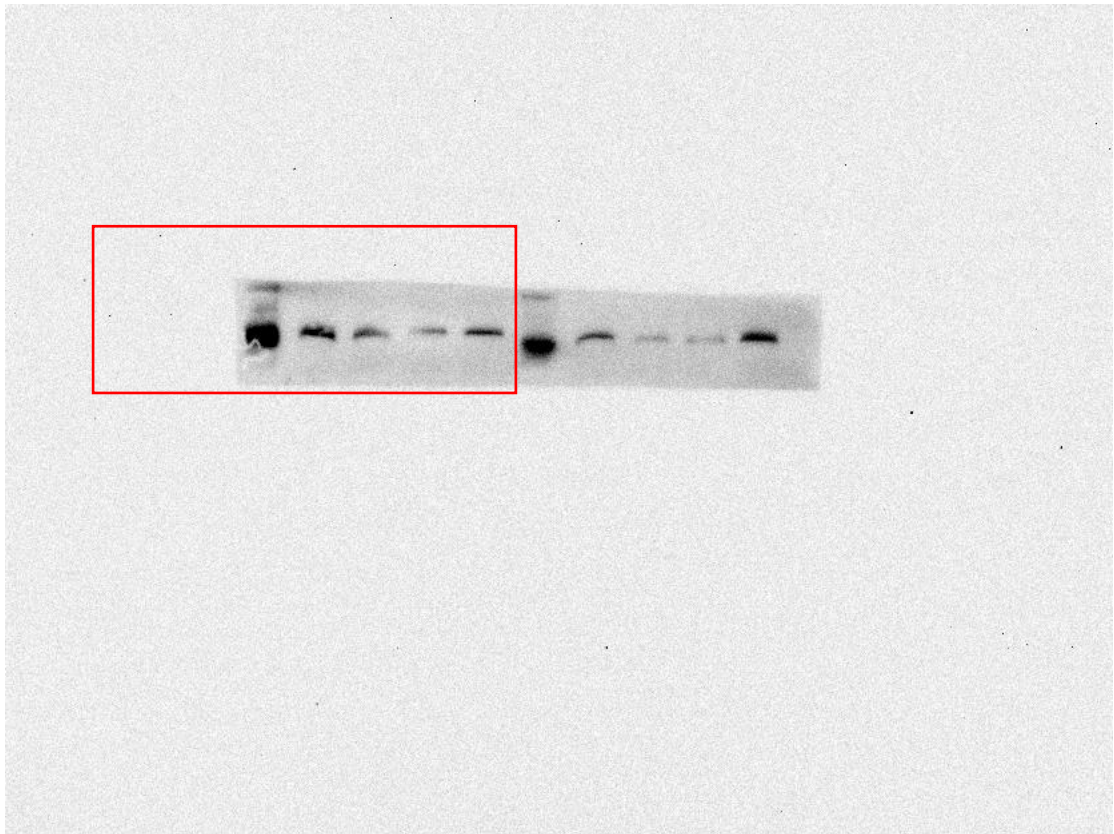

GALNT7(B-CPAP)

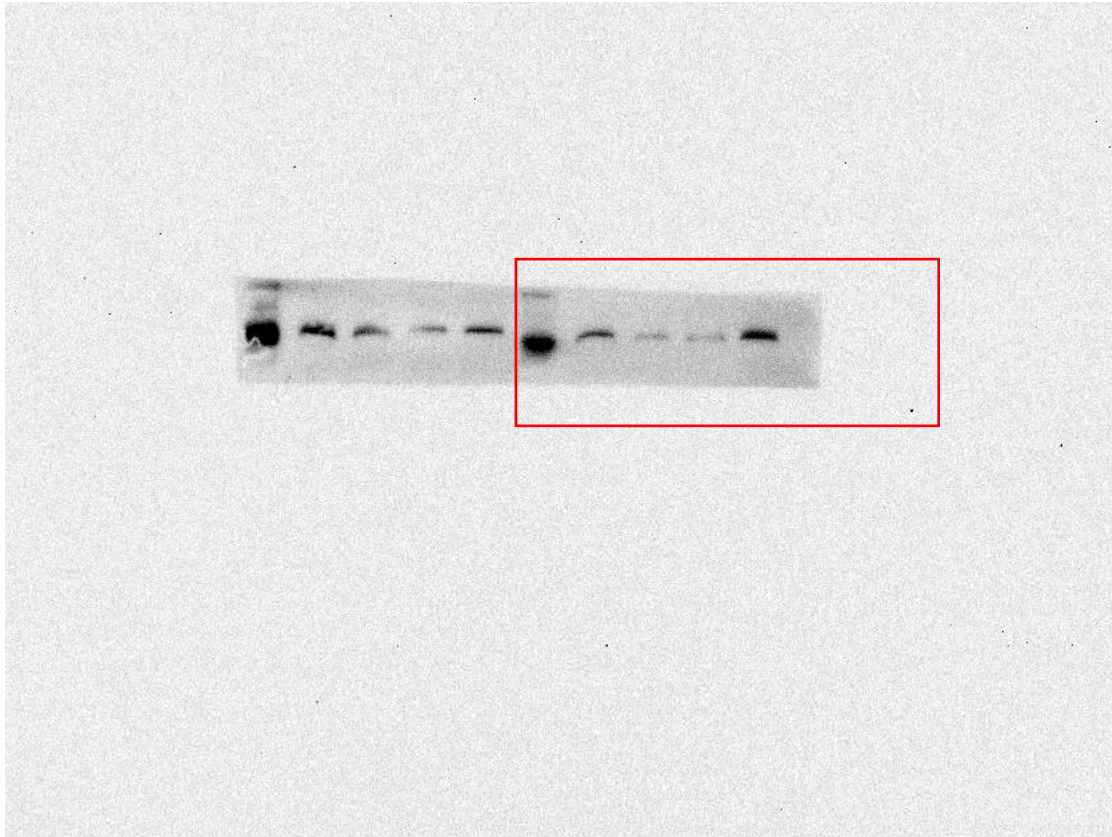

GAPDH(K-1 and B-CPAP)

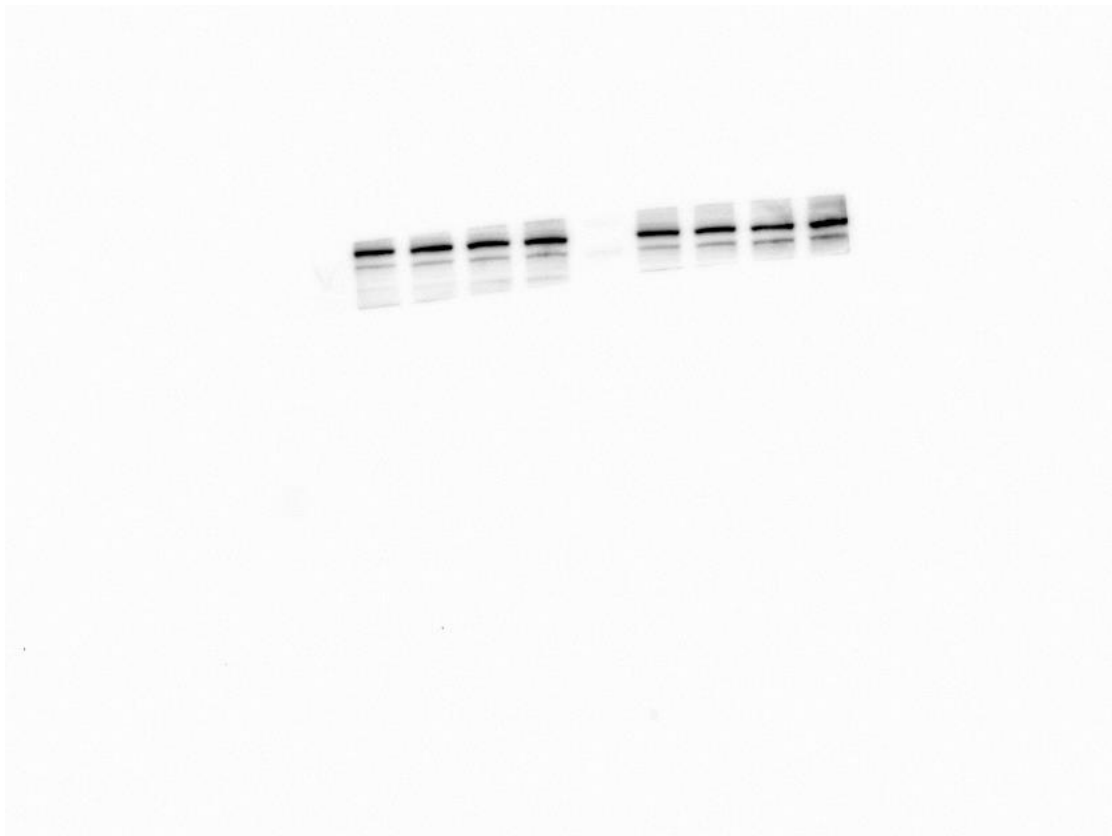

Fig.6 (B)  
GALNT7

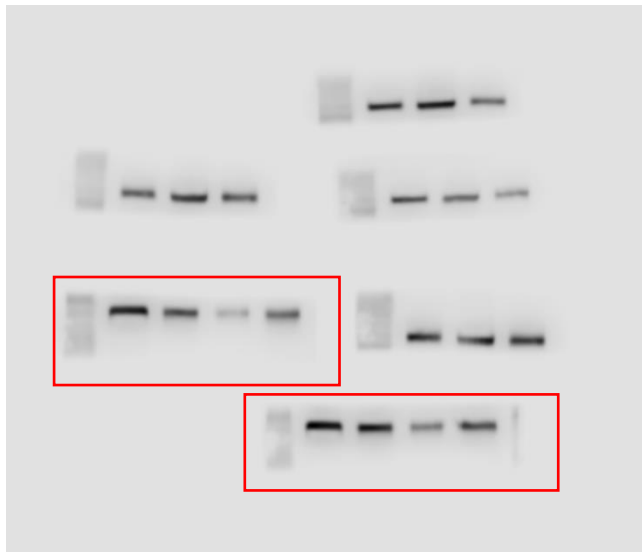

GAPDH

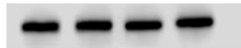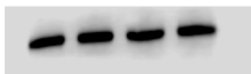

Fig.7 (C)  
EGFR

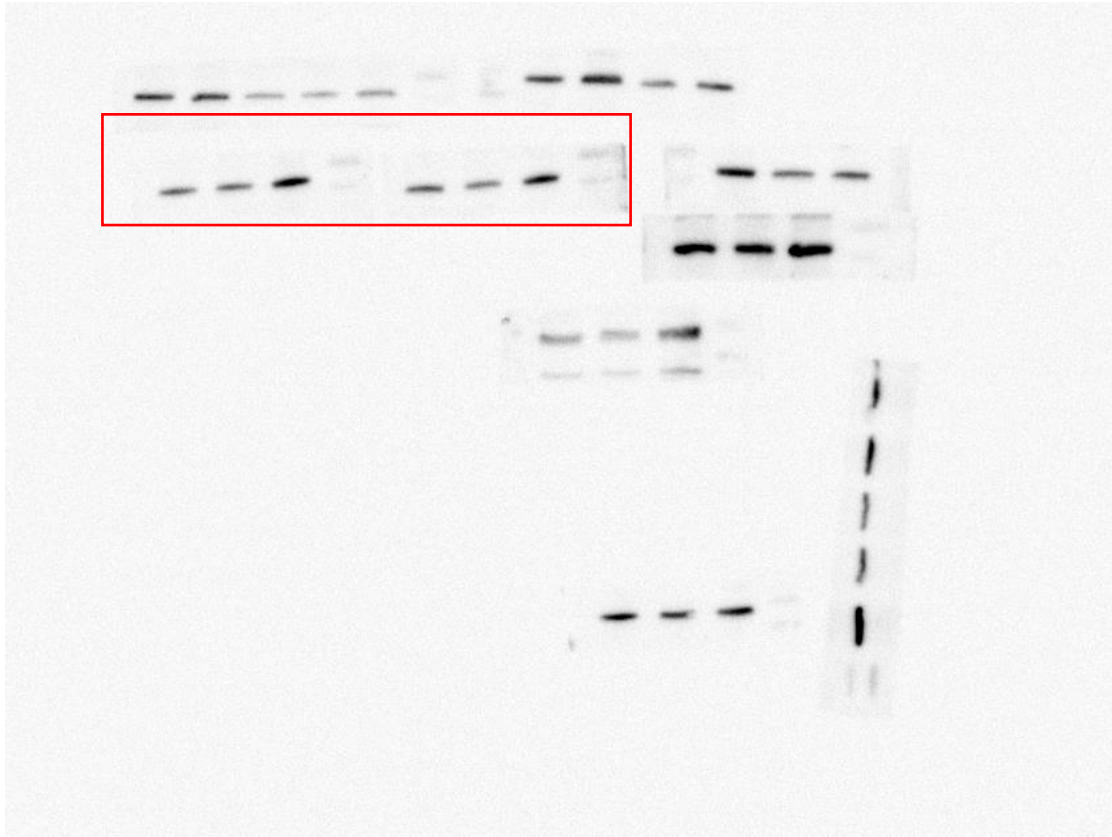

PI3K

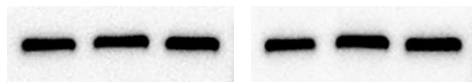

p-PI3K



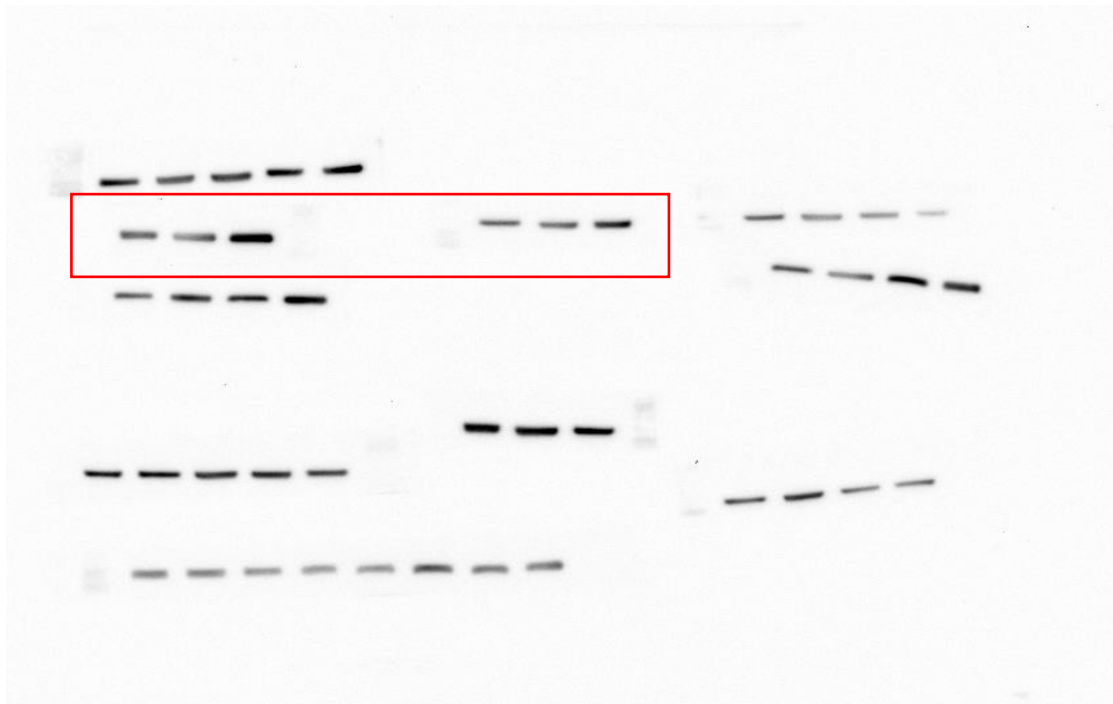

AKT

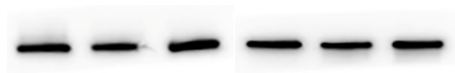

p-AKT

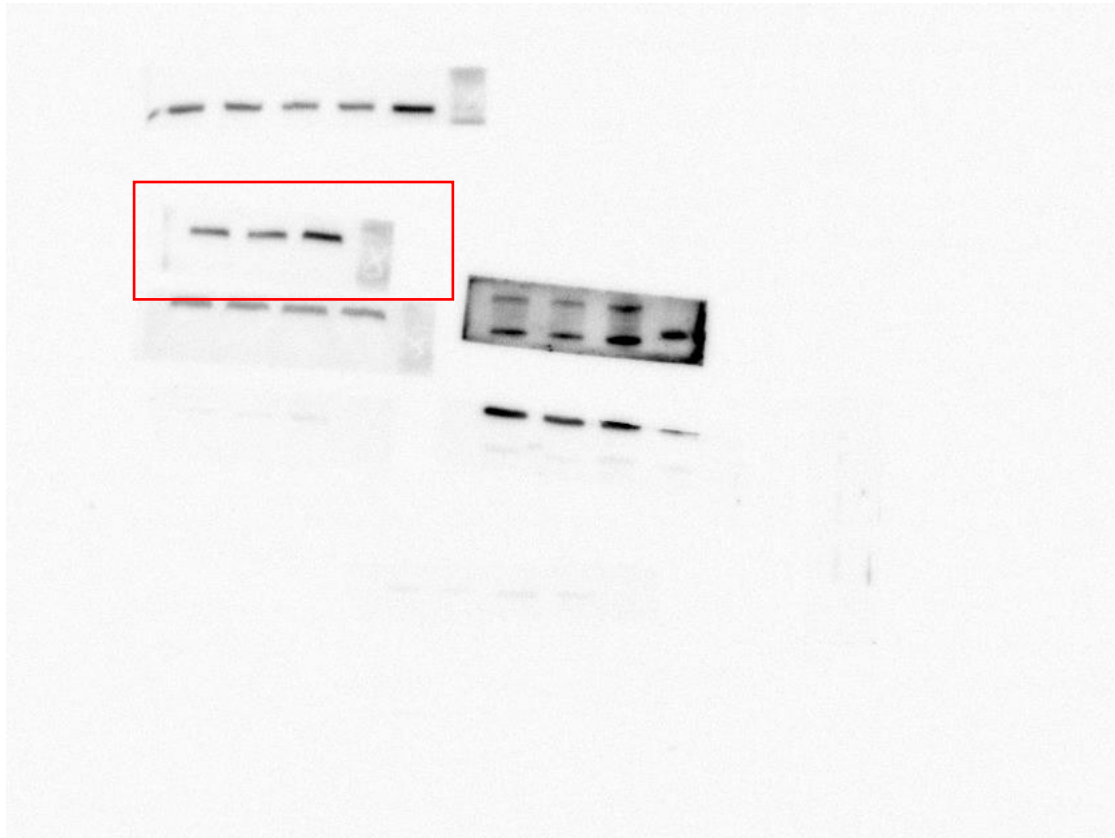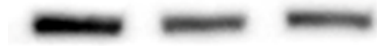

GALNT7

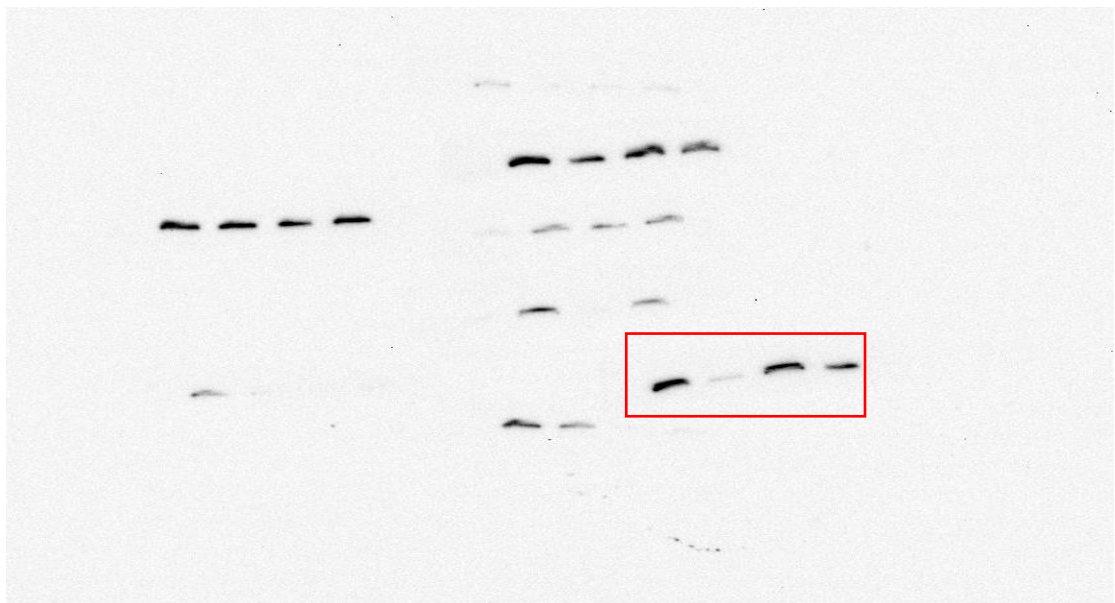

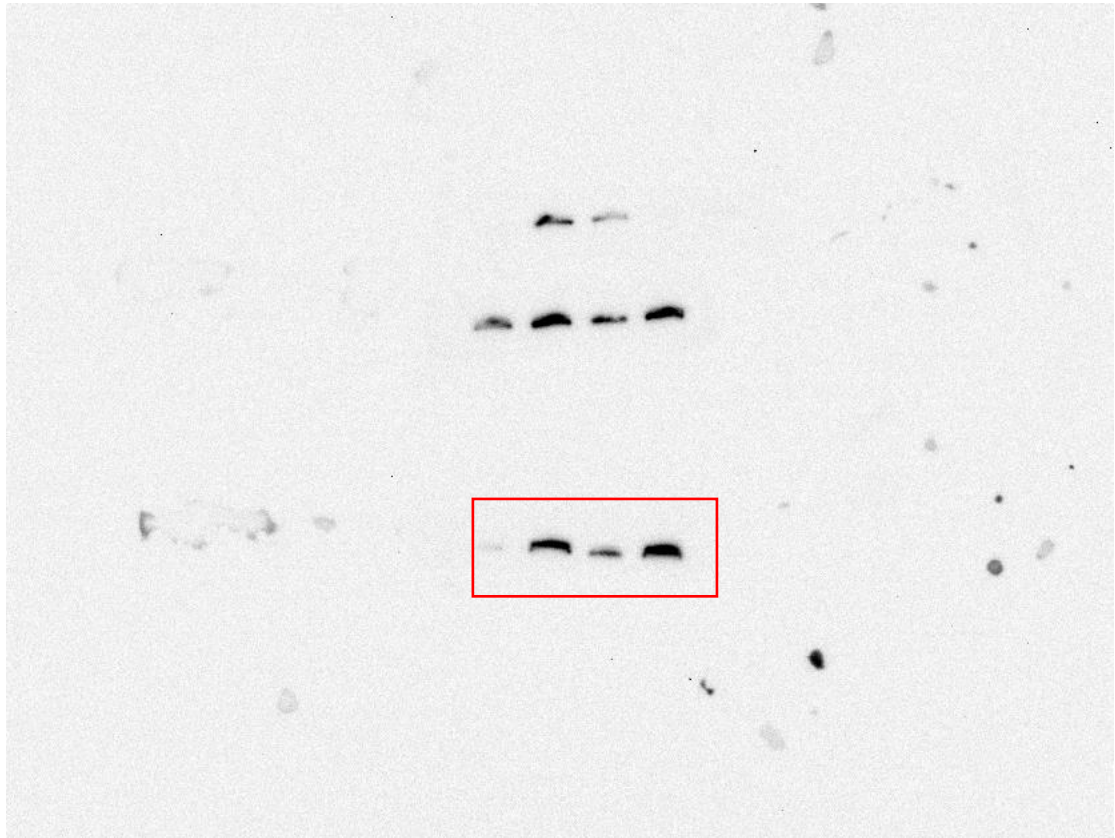

GAPDH

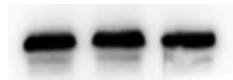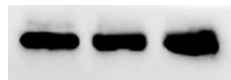

Fig.7 (D)  
EGFR

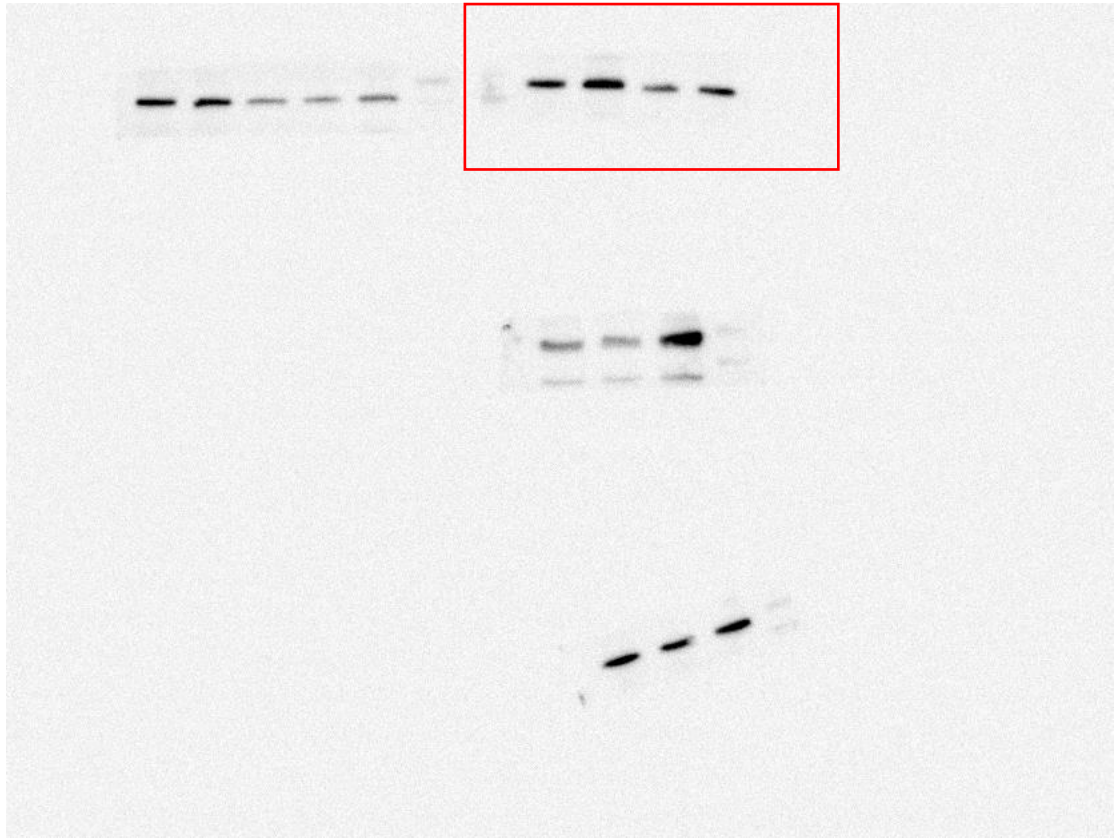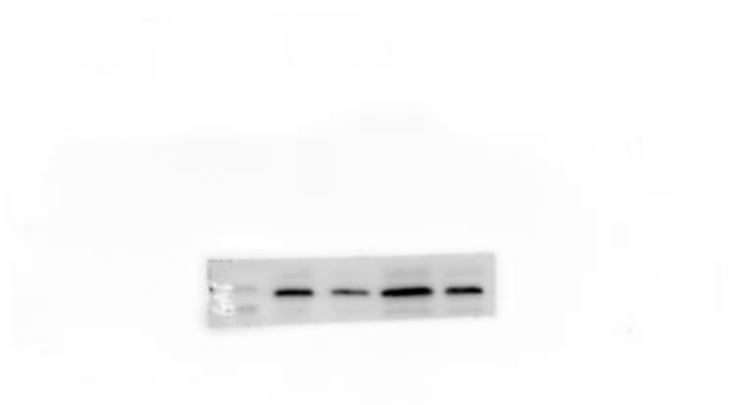

PI3K

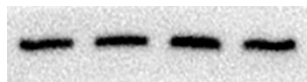

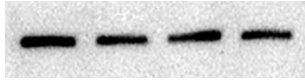

P-PI3K

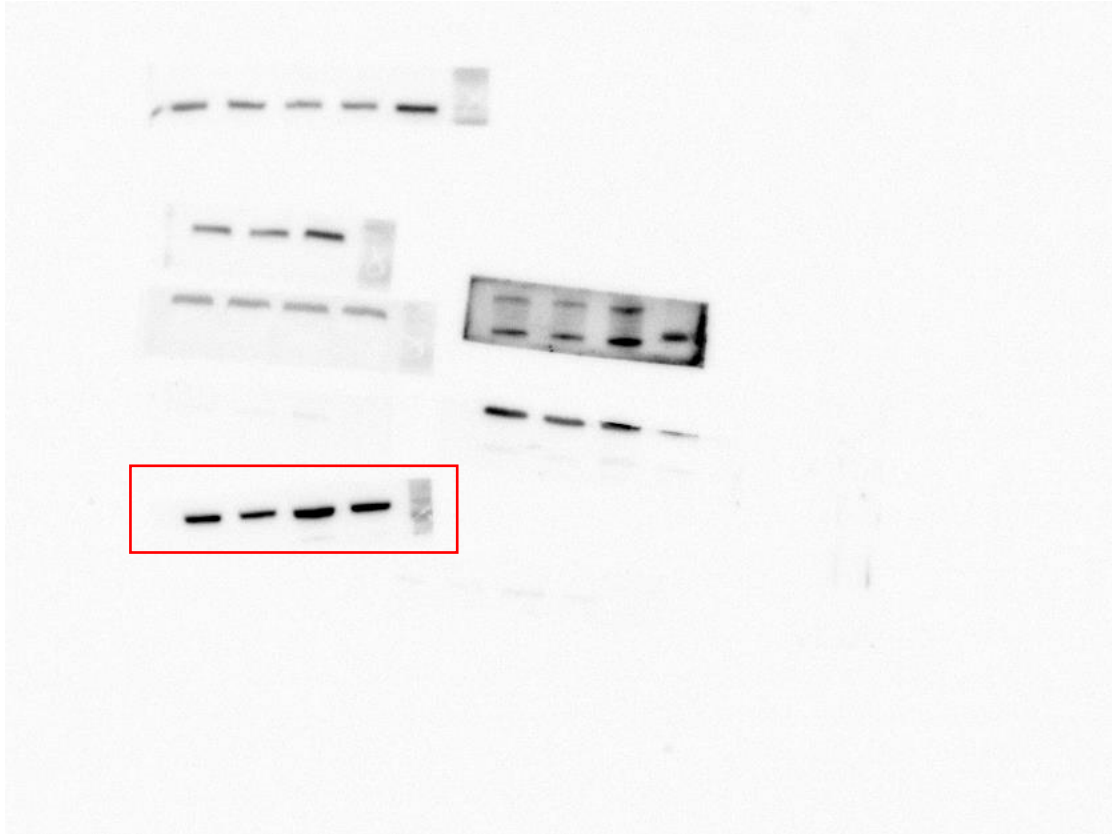



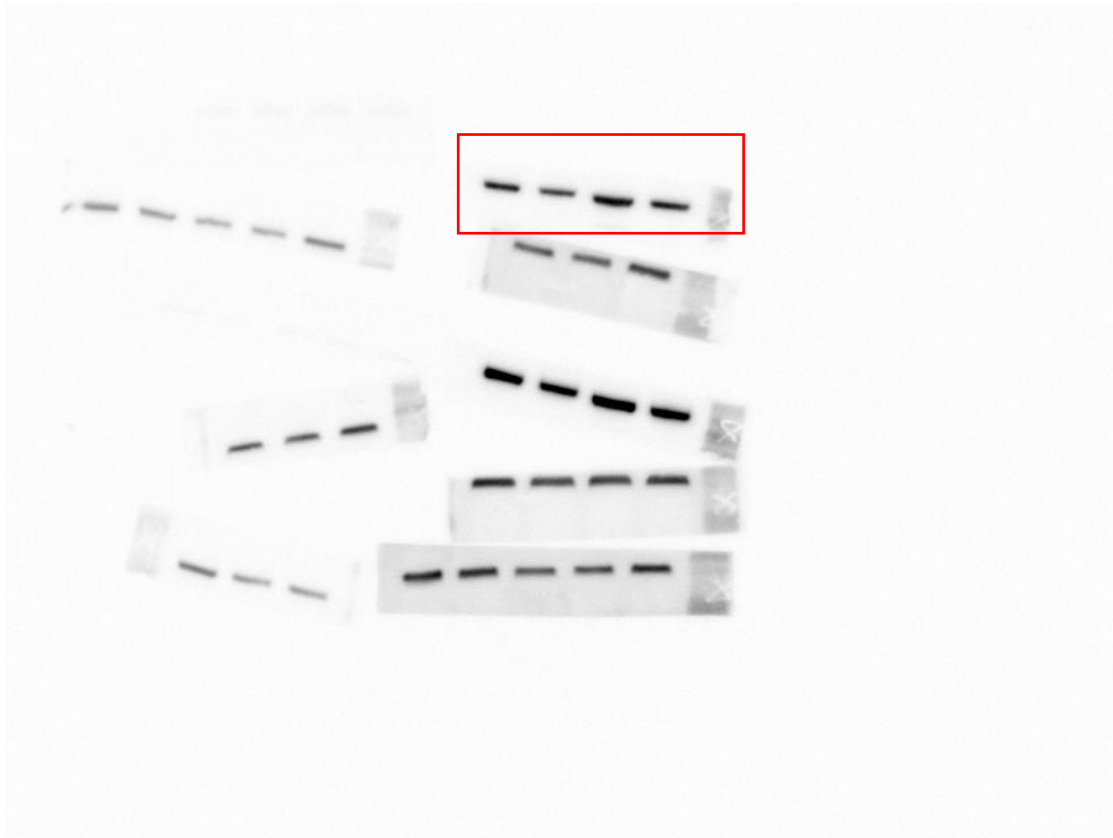

AKT

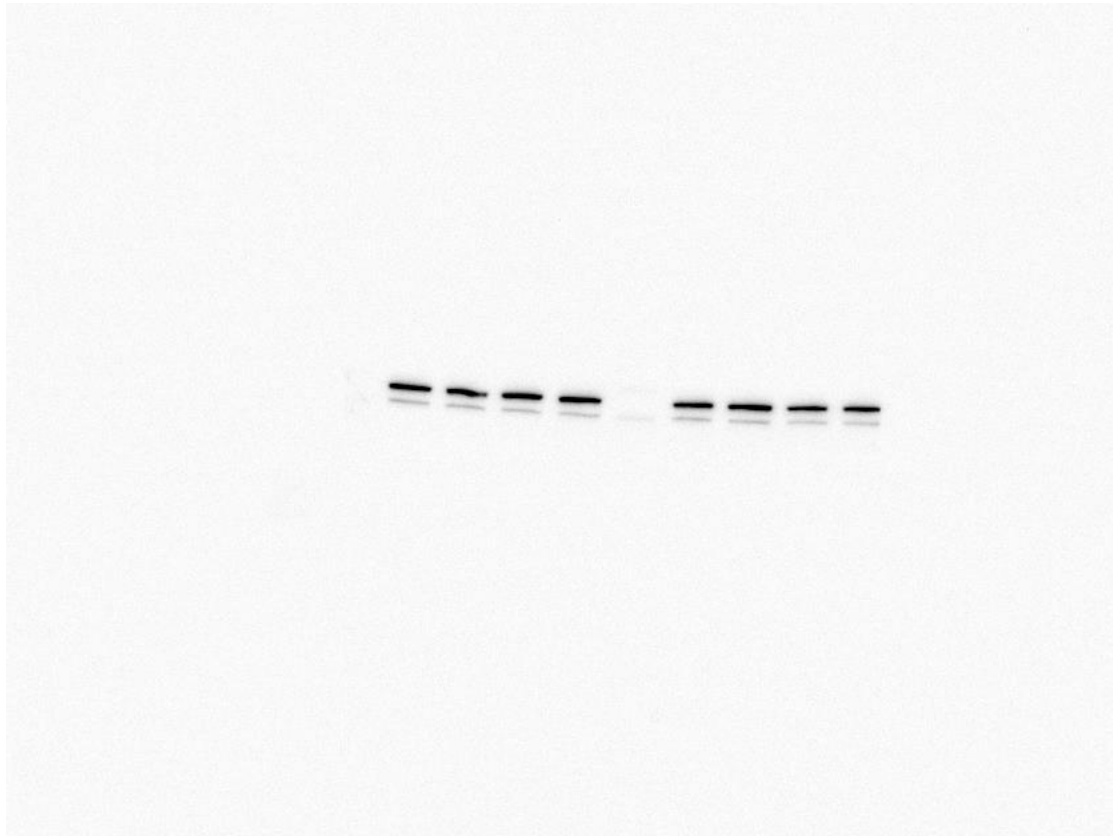

p-AKT

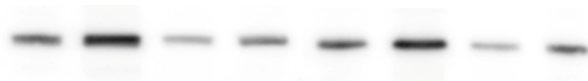

GALNT7

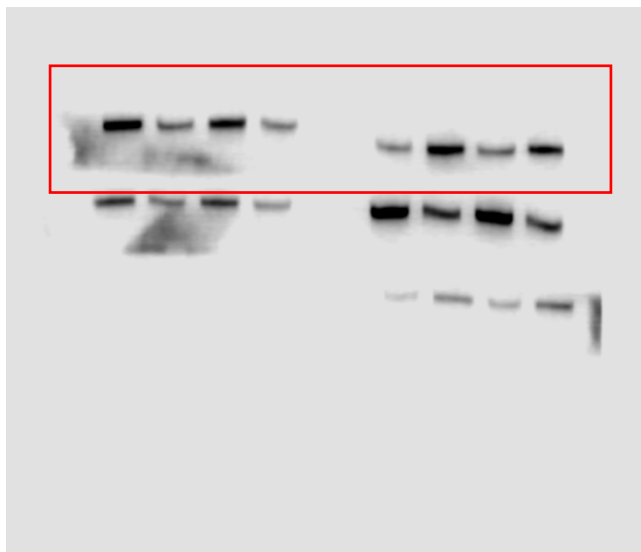

GAPDH

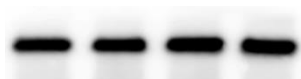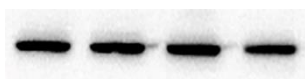

Fig.8(G)  
GALNT7

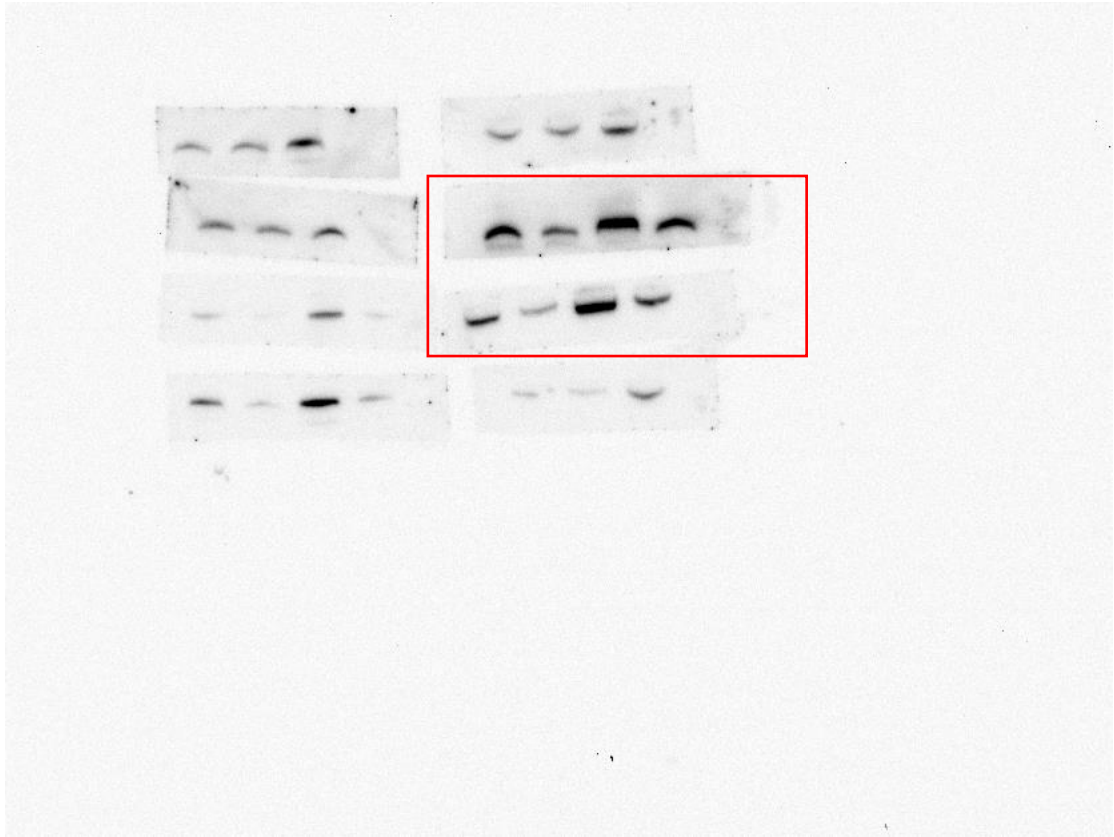

GAPDH

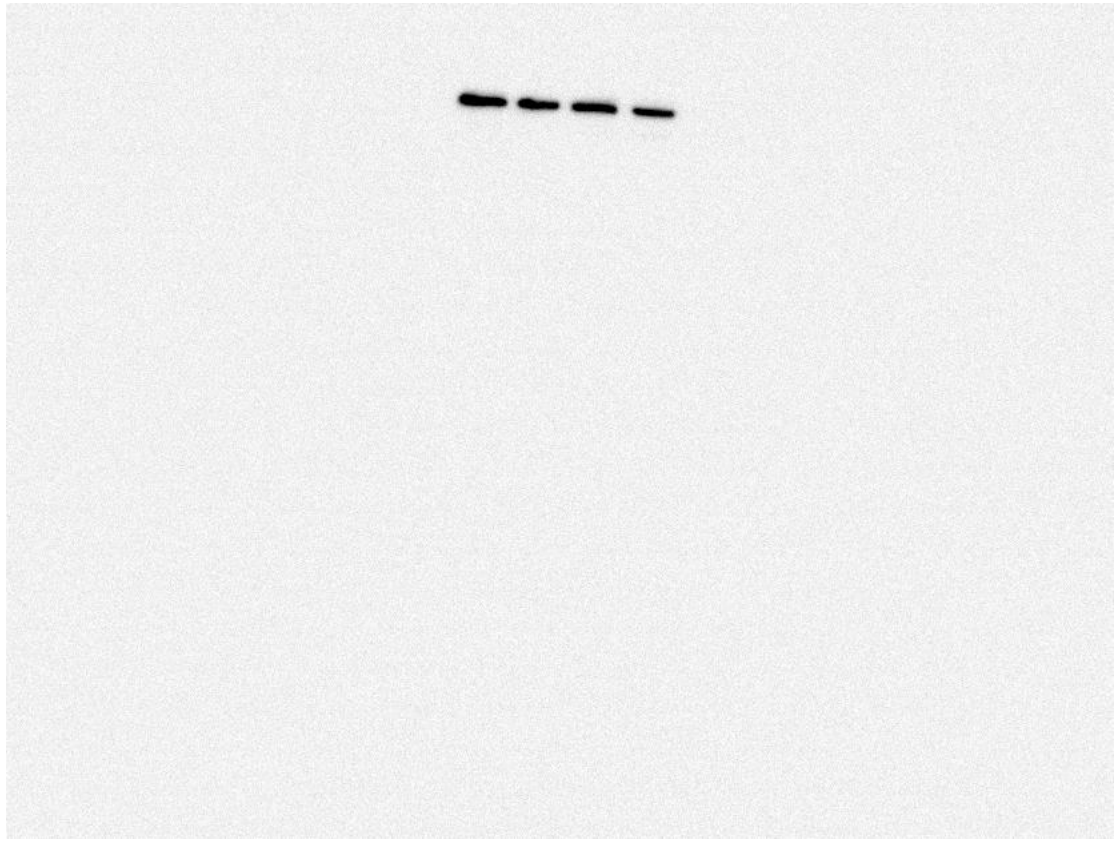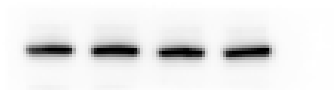

Supplement: 12935_2021_2323_MOESM6_ESM.pdf [file 12935_2021_2323_MOESM6_ESM.pdf]
