# Supplementary material for: miR-30b-5p inhibits proliferation, invasion, and migration of papillary thyroid cancer by targeting GALNT7 via the EGFR/PI3K/AKT pathway
Source: PubMed Central journal article supplement (PMC8611849; doi:10.1186/s12935-021-02323-x), 2021-11-24
Supplement: 12935_2021_2323_MOESM12_ESM.pdf [file 12935_2021_2323_MOESM12_ESM.pdf]

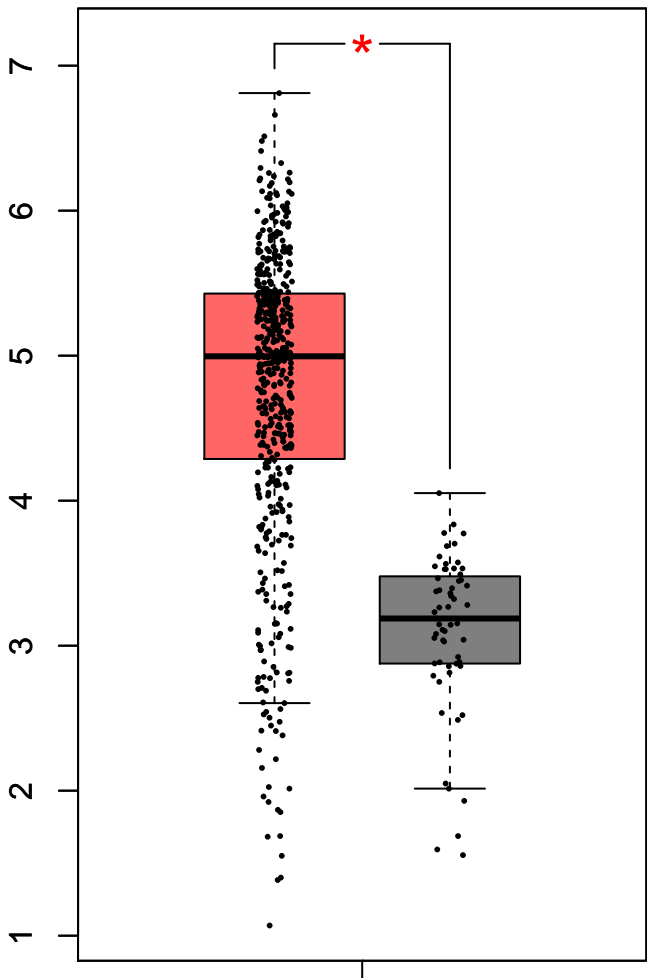

THCA  
(num(T)=512; num(N)=59)
