# Supplementary material for: miR-30b-5p inhibits proliferation, invasion, and migration of papillary thyroid cancer by targeting GALNT7 via the EGFR/PI3K/AKT pathway
Source: Cancer Cell Int. 2021 Nov 24;21:618. doi: 10.1186/s12935-021-02323-x (PMC8611849; doi:10.1186/s12935-021-02323-x)
Supplement: Supplementary file 1 — Additional file 1. The raw data of qRT-PCR assays. [file 12935_2021_2323_MOESM1_ESM.xlsx]

## Sheet: list
	U6=U6
	30B=mir-30b-5p
	THY=Nthy-ori-3-1				The conditions for the qPCR：mRNA							siG2008200202251193 si-h-GALNT7_001 TCATGTTGAAGGAGTAGAA
	K1=K-1				Stage 1		Reps: 1		95℃	30 sec		siG2008200202252285 si-h-GALNT7_002 GGAGATTCCCAGAAAGATA
	KTC-1=KTC-1											siG2008200202253377 si-h-GALNT7_003 TGAAAGAAGGGAAGGTTTA
	TPC-1=KTC-1				Stage 2		Reps: 40		95℃	10 sec
	B-CPAP=B-CPAP								60℃	30 sec		>hsa-miR-30b-5p	MIMAT0000420
	NM=NC mimic											UGUAAACAUCCUACACUCAGCU
	30M=mir-30b-5p mimic				Stage 3		Reps: 1		95℃	15 sec
	BMS=BMS-599626								60℃	60 sec		MIMIC:
	V=vector								95℃	15 sec		F(5'->3'): UGUAAACAUCCUACACUCAGCU
	G=GALNT7											R(3'->5'): ACAUUUGUAGGAUGUGAGUCGA
	NI=NC inhibitor
	30I=mir-30b-5p inhibitor				The conditions for the qPCR：miRNA							inhibitor：(5'->3'): AGCUGAGUGUAGGAUGUUUACA
					Stage 1		Reps: 1		95℃	5 min
					Stage 2		Reps: 40		95℃	10 sec		Negative control #22
									60℃	30 sec
												mimic：
					Stage 3		Reps: 1		95℃	15 sec		(5'->3'): UUUGUACUACACAAAAGUACUG
									60℃	60 sec		(3'->5'): AAACAUGAUGUGUUUUCAUGAC
									95℃	15 sec		inhibitor：
												(5'->3'): CAGUACUUUUGUGUAGUACAAA

## Sheet: Fig.1Btissue1
Block Type	96alum
Chemistry	SYBR_GREEN
Experiment File Name	D:\wongye\wongye-2020-11-23.eds
Experiment Run End Time	2011-06-01 12:23:13 上午 CST
Instrument Type	sds7500
Passive Reference	ROX
Well	Sample Name	Target Name	Task	Reporter	Quencher	RQ	Cт	Cт Mean	Cт SD	ΔCт	ΔCт Mean	ΔCт SE	HK Control ΔCт Mean	HK Control ΔCт SE	ΔΔCт	Automatic Ct Threshold	Automatic Baseline	Efficiency
A1	N1	U6	UNKNOWN	SYBR	None		14.7185	14.8309	0.0892913							TRUE	TRUE	1
A2	T1	U6	UNKNOWN	SYBR	None		15.5273	15.6406	0.00334205							TRUE	TRUE	1
A3	N2	U6	UNKNOWN	SYBR	None		12.1662	11.9202	0.121423							TRUE	TRUE	1
A4	T2	U6	UNKNOWN	SYBR	None		13.7006	13.7598	0.2141							TRUE	TRUE	1
A5	N3	U6	UNKNOWN	SYBR	None		14.548	14.3719	0.221413							TRUE	TRUE	1
A6	T3	U6	UNKNOWN	SYBR	None		12.5624	12.5813	0.154685							TRUE	TRUE	1
A7	N4	U6	UNKNOWN	SYBR	None		11.9635	12.0671	0.115735							TRUE	TRUE	1
A8	T4	U6	UNKNOWN	SYBR	None		11.5516	11.76	0.119539							TRUE	TRUE	1
A9	N5	U6	UNKNOWN	SYBR	None		13.9365	13.7485	0.225524							TRUE	TRUE	1
A10	T5	U6	UNKNOWN	SYBR	None		11.912	12.1037	0.0489151							TRUE	TRUE	1
A11	N6	U6	UNKNOWN	SYBR	None		14.0359	14.1201	0.15491							TRUE	TRUE	1
A12	T6	U6	UNKNOWN	SYBR	None		14.4142	14.3651	0.193522							TRUE	TRUE	1
B1	N1	U6	UNKNOWN	SYBR	None		14.5922	14.8309	0.0892913							TRUE	TRUE	1
B2	T1	U6	UNKNOWN	SYBR	None		15.532	15.6406	0.00334205							TRUE	TRUE	1
B3	N2	U6	UNKNOWN	SYBR	None		11.9945	11.9202	0.121423							TRUE	TRUE	1
B4	T2	U6	UNKNOWN	SYBR	None		14.0034	13.7598	0.2141							TRUE	TRUE	1
B5	N3	U6	UNKNOWN	SYBR	None		14.2348	14.3719	0.221413							TRUE	TRUE	1
B6	T3	U6	UNKNOWN	SYBR	None		12.7812	12.5813	0.154685							TRUE	TRUE	1
B7	N4	U6	UNKNOWN	SYBR	None		12.1271	12.0671	0.115735							TRUE	TRUE	1
B8	T4	U6	UNKNOWN	SYBR	None		11.7207	11.76	0.119539							TRUE	TRUE	1
B9	N5	U6	UNKNOWN	SYBR	None		13.6176	13.7485	0.225524							TRUE	TRUE	1
B10	T5	U6	UNKNOWN	SYBR	None		11.9812	12.1037	0.0489151							TRUE	TRUE	1
B11	N6	U6	UNKNOWN	SYBR	None		14.255	14.1201	0.15491							TRUE	TRUE	1
B12	T6	U6	UNKNOWN	SYBR	None		14.1405	14.3651	0.193522							TRUE	TRUE	1
C1	N1	30B	UNKNOWN	SYBR	None		23.561	23.2403	0.0134926							TRUE	TRUE	1
C2	T1	30B	UNKNOWN	SYBR	None		24.1008	24.055	0.215809							TRUE	TRUE	1
C3	N2	30B	UNKNOWN	SYBR	None		19.1616	19.0152	0.108451							TRUE	TRUE	1
C4	T2	30B	UNKNOWN	SYBR	None		21.0355	21.2006	0.18961							TRUE	TRUE	1
C5	N3	30B	UNKNOWN	SYBR	None		20.6231	20.9722	0.407045							TRUE	TRUE	1
C6	T3	30B	UNKNOWN	SYBR	None		21.8295	21.4934	0.0456541							TRUE	TRUE	1
C7	N4	30B	UNKNOWN	SYBR	None		18.471	18.7695	0.392912							TRUE	TRUE	1
C8	T4	30B	UNKNOWN	SYBR	None		20.2465	19.971	0.0518967							TRUE	TRUE	1
C9	N5	30B	UNKNOWN	SYBR	None		20.7204	20.4771	0.224952							TRUE	TRUE	1
C10	T5	30B	UNKNOWN	SYBR	None		22.204	22.1719	0.0401983							TRUE	TRUE	1
C11	N6	30B	UNKNOWN	SYBR	None		20.9896	21.0985	0.018634							TRUE	TRUE	1
C12	T6	30B	UNKNOWN	SYBR	None		22.0019	22.1443	0.282762							TRUE	TRUE	1
D1	N1	30B	UNKNOWN	SYBR	None	1	23.5419	23.2403	0.0134926		8.40936	0.0378993			0	TRUE	TRUE	1
D2	T1	30B	UNKNOWN	SYBR	None	0.996495	23.7956	24.055	0.215809		8.41442	0.109576			0.00506609	TRUE	TRUE	1
D3	N2	30B	UNKNOWN	SYBR	None	2.48682	19.3149	19.0152	0.108451		7.09505	0.114937			-1.3143	TRUE	TRUE	1
D4	T2	30B	UNKNOWN	SYBR	None	1.9569	21.3036	21.2006	0.18961		7.44079	0.0122452			-0.968567	TRUE	TRUE	1
D5	N3	30B	UNKNOWN	SYBR	None	3.50415	21.1988	20.9722	0.407045		6.60029	0.314229			-1.80906	TRUE	TRUE	1
D6	T3	30B	UNKNOWN	SYBR	None	0.705804	21.7649	21.4934	0.0456541		8.91202	0.10017			0.50266	TRUE	TRUE	1
D7	N4	30B	UNKNOWN	SYBR	None	3.26472	19.0266	18.7695	0.392912		6.7024	0.138588			-1.70696	TRUE	TRUE	1
D8	T4	30B	UNKNOWN	SYBR	None	1.14746	20.3199	19.971	0.0518967		8.21091	0.0338213			-0.198447	TRUE	TRUE	1
D9	N5	30B	UNKNOWN	SYBR	None	3.20588	20.4022	20.4771	0.224952		6.72864	0.00028566			-1.68072	TRUE	TRUE	1
D10	T5	30B	UNKNOWN	SYBR	None	0.3167	22.2609	22.1719	0.0401983		10.0682	0.00435843			1.65881	TRUE	TRUE	1
D11	N6	30B	UNKNOWN	SYBR	None	2.69625	20.9633	21.0985	0.018634		6.9784	0.0867719			-1.43096	TRUE	TRUE	1
D12	T6	30B	UNKNOWN	SYBR	None	1.54769	22.4018	22.1443	0.282762		7.77924	0.238142			-0.630117	TRUE	TRUE	1
E1	N7	U6	UNKNOWN	SYBR	None		14.4548	14.5255	0.0349483							TRUE	TRUE	1
E2	T7	U6	UNKNOWN	SYBR	None		12.4974	12.637	0.0254282							TRUE	TRUE	1
E3	N8	U6	UNKNOWN	SYBR	None		12.3115	12.2518	0.130498							TRUE	TRUE	1
E4	T8	U6	UNKNOWN	SYBR	None		12.0574	11.8857	0.1315							TRUE	TRUE	1
E5	N9	U6	UNKNOWN	SYBR	None		11.7072	11.488	0.0181696							TRUE	TRUE	1
E6	T9	U6	UNKNOWN	SYBR	None		12.4057	12.2767	0.115436							TRUE	TRUE	1
E7	N10	U6	UNKNOWN	SYBR	None		13.4107	13.3396	0.0264869							TRUE	TRUE	1
E8	T10	U6	UNKNOWN	SYBR	None		13.2693	13.2831	0.182447							TRUE	TRUE	1
E9	N11	U6	UNKNOWN	SYBR	None		12.0701	12.2085	0.0586886							TRUE	TRUE	1
E10	T11	U6	UNKNOWN	SYBR	None		13.513	13.3227	0.154379							TRUE	TRUE	1
E11	N12	U6	UNKNOWN	SYBR	None		13.4022	13.4136	0.141499							TRUE	TRUE	1
E12	T12	U6	UNKNOWN	SYBR	None		12.5244	12.5266	0.0767467							TRUE	TRUE	1
F1	N7	U6	UNKNOWN	SYBR	None		14.5042	14.5255	0.0349483							TRUE	TRUE	1
F2	T7	U6	UNKNOWN	SYBR	None		12.4614	12.637	0.0254282							TRUE	TRUE	1
F3	N8	U6	UNKNOWN	SYBR	None		12.496	12.2518	0.130498							TRUE	TRUE	1
F4	T8	U6	UNKNOWN	SYBR	None		11.8714	11.8857	0.1315							TRUE	TRUE	1
F5	N9	U6	UNKNOWN	SYBR	None		11.6815	11.488	0.0181696							TRUE	TRUE	1
F6	T9	U6	UNKNOWN	SYBR	None		12.2424	12.2767	0.115436							TRUE	TRUE	1
F7	N10	U6	UNKNOWN	SYBR	None		13.4482	13.3396	0.0264869							TRUE	TRUE	1
F8	T10	U6	UNKNOWN	SYBR	None		13.5273	13.2831	0.182447							TRUE	TRUE	1
F9	N11	U6	UNKNOWN	SYBR	None		12.1531	12.2085	0.0586886							TRUE	TRUE	1
F10	T11	U6	UNKNOWN	SYBR	None		13.2946	13.3227	0.154379							TRUE	TRUE	1
F11	N12	U6	UNKNOWN	SYBR	None		13.2021	13.4136	0.141499							TRUE	TRUE	1
F12	T12	U6	UNKNOWN	SYBR	None		12.633	12.5266	0.0767467							TRUE	TRUE	1
G1	N7	30B	UNKNOWN	SYBR	None		21.3874	21.3679	0.0987715							TRUE	TRUE	1
G2	T7	30B	UNKNOWN	SYBR	None		20.9212	20.8841	0.0882833							TRUE	TRUE	1
G3	N8	30B	UNKNOWN	SYBR	None		19.2413	19.1929	0.0279897							TRUE	TRUE	1
G4	T8	30B	UNKNOWN	SYBR	None		21.1443	21.3568	0.309868							TRUE	TRUE	1
G5	N9	30B	UNKNOWN	SYBR	None		19.2824	19.3383	0.146353							TRUE	TRUE	1
G6	T9	30B	UNKNOWN	SYBR	None		19.9467	20.2809	0.371141							TRUE	TRUE	1
G7	N10	30B	UNKNOWN	SYBR	None		20.0574	20.2646	0.0858523							TRUE	TRUE	1
G8	T10	30B	UNKNOWN	SYBR	None		21.7527	21.4324	0.418458							TRUE	TRUE	1
G9	N11	30B	UNKNOWN	SYBR	None		19.8973	19.9725	0.31677							TRUE	TRUE	1
G10	T11	30B	UNKNOWN	SYBR	None		21.484	21.3898	0.154608							TRUE	TRUE	1
G11	N12	30B	UNKNOWN	SYBR	None		21.4631	21.6502	0.299136							TRUE	TRUE	1
G12	T12	30B	UNKNOWN	SYBR	None		20.6306	20.6806	0.247373							TRUE	TRUE	1
H1	N7	30B	UNKNOWN	SYBR	None	2.96274	21.2477	21.3679	0.0987715		6.84243	0.0668599			-1.56693	TRUE	TRUE	1
H2	T7	30B	UNKNOWN	SYBR	None	1.11904	21.046	20.8841	0.0882833		8.2471	0.0568558			-0.162258	TRUE	TRUE	1
H3	N8	30B	UNKNOWN	SYBR	None	2.76681	19.2809	19.1929	0.0279897		6.94113	0.051254			-1.46822	TRUE	TRUE	1
H4	T8	30B	UNKNOWN	SYBR	None	0.479026	21.5825	21.3568	0.309868		9.47118	0.220684			1.06182	TRUE	TRUE	1
H5	N9	30B	UNKNOWN	SYBR	None	1.47329	19.0755	19.3383	0.146353		7.85032	0.0640919			-0.559039	TRUE	TRUE	1
H6	T9	30B	UNKNOWN	SYBR	None	1.32425	20.4716	20.2809	0.371141		8.00418	0.243289			-0.405174	TRUE	TRUE	1
H7	N10	30B	UNKNOWN	SYBR	None	2.79775	19.936	20.2646	0.0858523		6.92509	0.0561696			-1.48427	TRUE	TRUE	1
H8	T10	30B	UNKNOWN	SYBR	None	1.19759	21.1609	21.4324	0.418458		8.14923	0.300452			-0.260131	TRUE	TRUE	1
H9	N11	30B	UNKNOWN	SYBR	None	1.56411	20.3453	19.9725	0.31677		7.76401	0.129041			-0.645344	TRUE	TRUE	1
H10	T11	30B	UNKNOWN	SYBR	None	1.26771	21.2653	21.3898	0.154608		8.06713	0.000114387			-0.342227	TRUE	TRUE	1
H11	N12	30B	UNKNOWN	SYBR	None	1.1272	21.8862	21.6502	0.299136		8.23661	0.220318			-0.172748	TRUE	TRUE	1
H12	T12	30B	UNKNOWN	SYBR	None	1.19359	20.2807	20.6806	0.247373		8.15405	0.16206			-0.255303	TRUE	TRUE	1
Analysis Type	Singleplex
Endogenous Control	U6
RQ Min/Max Confidence Level	95.0
Reference Sample	N1
				N	T
				1	0.996495
				2.48682	1.9569
				3.50415	0.705804
				3.26472	1.14746
				3.20588	0.3167
				2.69625	1.54769
				2.96274	1.11904
				2.76681	0.479026
				1.47329	1.32425
				2.79775	1.19759
				1.56411	1.26771
				1.1272	1.19359

## Sheet: Fig.1Btissue2
Block Type	96alum
Chemistry	SYBR_GREEN
Experiment File Name	D:\wongye\wongye-2020-11-16.eds
Experiment Run End Time	2011-05-24 07:51:23 上午 CST
Instrument Type	sds7500
Passive Reference	ROX
Well	Sample Name	Target Name	Task	Reporter	Quencher	RQ	Cт	Cт Mean	Cт SD	ΔCт	ΔCт Mean	ΔCт SE	HK Control ΔCт Mean	HK Control ΔCт SE	ΔΔCт	Automatic Ct Threshold	Automatic Baseline	Efficiency
A1	N1	U6	UNKNOWN	SYBR	None		11.0559	11.2611	0.194816							TRUE	TRUE	1
A2	T1	U6	UNKNOWN	SYBR	None		14.477	14.5879	0.0795125							TRUE	TRUE	1
A3	N2	U6	UNKNOWN	SYBR	None		13.7121	13.8593	0.276455							TRUE	TRUE	1
A4	T2	U6	UNKNOWN	SYBR	None		14.816	14.8958	0.0238686							TRUE	TRUE	1
A5	N3	U6	UNKNOWN	SYBR	None		13.9242	13.9579	0.0770196							TRUE	TRUE	1
A6	T3	U6	UNKNOWN	SYBR	None		11.3106	11.2785	0.0429465							TRUE	TRUE	1
A7	N4	U6	UNKNOWN	SYBR	None		14.1614	14.3198	0.256485							TRUE	TRUE	1
A8	T4	U6	UNKNOWN	SYBR	None		13.5839	13.4418	0.115566							TRUE	TRUE	1
A9	N5	U6	UNKNOWN	SYBR	None		14.6475	14.6092	0.138921							TRUE	TRUE	1
A10	T5	U6	UNKNOWN	SYBR	None		12.6089	12.8089	0.270348							TRUE	TRUE	1
A11	N6	U6	UNKNOWN	SYBR	None		15.1407	14.902	0.281217							TRUE	TRUE	1
A12	T6	U6	UNKNOWN	SYBR	None		14.6847	14.8324	0.0344005							TRUE	TRUE	1
B1	N1	U6	UNKNOWN	SYBR	None		11.3314	11.2611	0.194816							TRUE	TRUE	1
B2	T1	U6	UNKNOWN	SYBR	None		14.5894	14.5879	0.0795125							TRUE	TRUE	1
B3	N2	U6	UNKNOWN	SYBR	None		14.103	13.8593	0.276455							TRUE	TRUE	1
B4	T2	U6	UNKNOWN	SYBR	None		14.8498	14.8958	0.0238686							TRUE	TRUE	1
B5	N3	U6	UNKNOWN	SYBR	None		14.0331	13.9579	0.0770196							TRUE	TRUE	1
B6	T3	U6	UNKNOWN	SYBR	None		11.3713	11.2785	0.0429465							TRUE	TRUE	1
B7	N4	U6	UNKNOWN	SYBR	None		14.5242	14.3198	0.256485							TRUE	TRUE	1
B8	T4	U6	UNKNOWN	SYBR	None		13.4205	13.4418	0.115566							TRUE	TRUE	1
B9	N5	U6	UNKNOWN	SYBR	None		14.844	14.6092	0.138921							TRUE	TRUE	1
B10	T5	U6	UNKNOWN	SYBR	None		12.9912	12.8089	0.270348							TRUE	TRUE	1
B11	N6	U6	UNKNOWN	SYBR	None		14.743	14.902	0.281217							TRUE	TRUE	1
B12	T6	U6	UNKNOWN	SYBR	None		14.7334	14.8324	0.0344005							TRUE	TRUE	1
C1	N1	30B	UNKNOWN	SYBR	None		27.511	27.937	0.108482							TRUE	TRUE	1
C2	T1	30B	UNKNOWN	SYBR	None		30.054	30.5432	0.699239							TRUE	TRUE	1
C3	N2	30B	UNKNOWN	SYBR	None		29.2871	29.7263	0.236213							TRUE	TRUE	1
C4	T2	30B	UNKNOWN	SYBR	None		31.8971	31.7837	0.351619							TRUE	TRUE	1
C5	N3	30B	UNKNOWN	SYBR	None		29.0734	29.0287	0.136789							TRUE	TRUE	1
C6	T3	30B	UNKNOWN	SYBR	None		26.9261	27.4325	0.429756							TRUE	TRUE	1
C7	N4	30B	UNKNOWN	SYBR	None		29.6803	29.8052	0.259688							TRUE	TRUE	1
C8	T4	30B	UNKNOWN	SYBR	None		29.7975	29.9178	0.289775							TRUE	TRUE	1
C9	N5	30B	UNKNOWN	SYBR	None		30.2114	30.4592	0.105095							TRUE	TRUE	1
C10	T5	30B	UNKNOWN	SYBR	None		28.9049	28.7988	0.0896053							TRUE	TRUE	1
C11	N6	30B	UNKNOWN	SYBR	None		30.5318	30.0386	0.325398							TRUE	TRUE	1
C12	T6	30B	UNKNOWN	SYBR	None		31.689	31.9127	0.0549174							TRUE	TRUE	1
D1	N1	30B	UNKNOWN	SYBR	None	1	27.3576	27.937	0.108482		16.676	0.151649			0	TRUE	TRUE	1
D2	T1	30B	UNKNOWN	SYBR	None	1.64793	31.0428	30.5432	0.699239		15.9553	0.309863			-0.720657	TRUE	TRUE	1
D3	N2	30B	UNKNOWN	SYBR	None	1.75198	29.6211	29.7263	0.236213		15.867	0.0201209			-0.808985	TRUE	TRUE	1
D4	T2	30B	UNKNOWN	SYBR	None	0.863393	31.3998	31.7837	0.351619		16.8879	0.187744			0.211911	TRUE	TRUE	1
D5	N3	30B	UNKNOWN	SYBR	None	3.04216	28.8799	29.0287	0.136789		15.0709	0.106904			-1.6051	TRUE	TRUE	1
D6	T3	30B	UNKNOWN	SYBR	None	1.43583	27.5339	27.4325	0.429756		16.1541	0.193405			-0.521882	TRUE	TRUE	1
D7	N4	30B	UNKNOWN	SYBR	None	2.2825	29.313	29.8052	0.259688		15.4854	0.258086			-1.19062	TRUE	TRUE	1
D8	T4	30B	UNKNOWN	SYBR	None	1.14873	30.2073	29.9178	0.289775		16.4759	0.202671			-0.200045	TRUE	TRUE	1
D9	N5	30B	UNKNOWN	SYBR	None	1.77277	30.36	30.4592	0.105095		15.85	0.0169134			-0.826006	TRUE	TRUE	1
D10	T5	30B	UNKNOWN	SYBR	None	1.60881	28.7782	28.7988	0.0896053		15.99	0.179977			-0.685994	TRUE	TRUE	1
D11	N6	30B	UNKNOWN	SYBR	None	2.90683	30.0717	30.0386	0.325398		15.1365	0.0220906			-1.53945	TRUE	TRUE	1
D12	T6	30B	UNKNOWN	SYBR	None	0.755601	31.6114	31.9127	0.0549174		17.0803	0.0446589			0.404303	TRUE	TRUE	1
E1	N7	U6	UNKNOWN	SYBR	None		14.841	14.7057	0.138238							TRUE	TRUE	1
E2	T7	U6	UNKNOWN	SYBR	None		15.4863	15.4501	0.095668							TRUE	TRUE	1
E3	N8	U6	UNKNOWN	SYBR	None		15.4154	15.6475	0.140009							TRUE	TRUE	1
E4	T8	U6	UNKNOWN	SYBR	None		15.2253	15.2335	0.135915							TRUE	TRUE	1
E5	N9	U6	UNKNOWN	SYBR	None		13.1796	13.0246	0.138902							TRUE	TRUE	1
E6	T9	U6	UNKNOWN	SYBR	None		15.9925	15.806	0.0644712							TRUE	TRUE	1
E7	N10	U6	UNKNOWN	SYBR	None		12.4027	12.5895	0.0482875							TRUE	TRUE	1
E8	T10	U6	UNKNOWN	SYBR	None		15.0512	15.0386	0.0994569							TRUE	TRUE	1
E9	N11	U6	UNKNOWN	SYBR	None		12.9061	13.0446	0.141864							TRUE	TRUE	1
E10	T11	U6	UNKNOWN	SYBR	None		11.7227	11.8765	0.113996							TRUE	TRUE	1
E11	N12	U6	UNKNOWN	SYBR	None		11.8144	12.0626	0.09799							TRUE	TRUE	1
E12	T12	U6	UNKNOWN	SYBR	None		15.5275	15.4729	0.110398							TRUE	TRUE	1
F1	N7	U6	UNKNOWN	SYBR	None		14.6455	14.7057	0.138238							TRUE	TRUE	1
F2	T7	U6	UNKNOWN	SYBR	None		15.351	15.4501	0.095668							TRUE	TRUE	1
F3	N8	U6	UNKNOWN	SYBR	None		15.6134	15.6475	0.140009							TRUE	TRUE	1
F4	T8	U6	UNKNOWN	SYBR	None		15.0331	15.2335	0.135915							TRUE	TRUE	1
F5	N9	U6	UNKNOWN	SYBR	None		12.9831	13.0246	0.138902							TRUE	TRUE	1
F6	T9	U6	UNKNOWN	SYBR	None		15.9013	15.806	0.0644712							TRUE	TRUE	1
F7	N10	U6	UNKNOWN	SYBR	None		12.471	12.5895	0.0482875							TRUE	TRUE	1
F8	T10	U6	UNKNOWN	SYBR	None		14.9106	15.0386	0.0994569							TRUE	TRUE	1
F9	N11	U6	UNKNOWN	SYBR	None		13.1067	13.0446	0.141864							TRUE	TRUE	1
F10	T11	U6	UNKNOWN	SYBR	None		11.884	11.8765	0.113996							TRUE	TRUE	1
F11	N12	U6	UNKNOWN	SYBR	None		11.9529	12.0626	0.09799							TRUE	TRUE	1
F12	T12	U6	UNKNOWN	SYBR	None		15.6837	15.4729	0.110398							TRUE	TRUE	1
G1	N7	30B	UNKNOWN	SYBR	None		30.0426	29.9266	0.153036							TRUE	TRUE	1
G2	T7	30B	UNKNOWN	SYBR	None		32.6829	32.9282	0.513589							TRUE	TRUE	1
G3	N8	30B	UNKNOWN	SYBR	None		31.0837	30.6832	0.576147							TRUE	TRUE	1
G4	T8	30B	UNKNOWN	SYBR	None		32.1517	32.2263	0.175746							TRUE	TRUE	1
G5	N9	30B	UNKNOWN	SYBR	None		28.3846	28.1319	0.514469							TRUE	TRUE	1
G6	T9	30B	UNKNOWN	SYBR	None		31.5158	31.9989	0.455654							TRUE	TRUE	1
G7	N10	30B	UNKNOWN	SYBR	None		27.8479	27.9221	0.0673984							TRUE	TRUE	1
G8	T10	30B	UNKNOWN	SYBR	None		31.1332	31.2295	0.051216							TRUE	TRUE	1
G9	N11	30B	UNKNOWN	SYBR	None		28.8958	29.2966	0.539464							TRUE	TRUE	1
G10	T11	30B	UNKNOWN	SYBR	None		27.8856	27.5281	0.0897807							TRUE	TRUE	1
G11	N12	30B	UNKNOWN	SYBR	None		27.5466	27.1551	0.122203							TRUE	TRUE	1
G12	T12	30B	UNKNOWN	SYBR	None		31.7583	31.2789	0.327534							TRUE	TRUE	1
H1	N7	30B	UNKNOWN	SYBR	None	2.74159	30.259	29.9266	0.153036		15.221	0.145637			-1.45501	TRUE	TRUE	1
H2	T7	30B	UNKNOWN	SYBR	None	0.573477	33.4093	32.9282	0.513589		17.4782	0.304629			0.802193	TRUE	TRUE	1
H3	N8	30B	UNKNOWN	SYBR	None	3.1172	30.2689	30.6832	0.576147		15.0357	0.358078			-1.64025	TRUE	TRUE	1
H4	T8	30B	UNKNOWN	SYBR	None	0.802811	31.9032	32.2263	0.175746		16.9928	0.0199151			0.316867	TRUE	TRUE	1
H5	N9	30B	UNKNOWN	SYBR	None	2.96646	27.6571	28.1319	0.514469		15.1072	0.187783			-1.56874	TRUE	TRUE	1
H6	T9	30B	UNKNOWN	SYBR	None	1.39767	32.1602	31.9989	0.455654		16.193	0.260062			-0.483026	TRUE	TRUE	1
H7	N10	30B	UNKNOWN	SYBR	None	2.53754	27.7526	27.9221	0.0673984		15.3325	0.057843			-1.34343	TRUE	TRUE	1
H8	T10	30B	UNKNOWN	SYBR	None	1.39968	31.2057	31.2295	0.051216		16.1909	0.0753364			-0.4851	TRUE	TRUE	1
H9	N11	30B	UNKNOWN	SYBR	None	1.34161	29.6587	29.2966	0.539464		16.252	0.1988			-0.423962	TRUE	TRUE	1
H10	T11	30B	UNKNOWN	SYBR	None	2.03416	28.0126	27.5281	0.0897807		15.6515	0.0121076			-1.02443	TRUE	TRUE	1
H11	N12	30B	UNKNOWN	SYBR	None	2.99699	27.3738	27.1551	0.122203		15.0925	0.110097			-1.58351	TRUE	TRUE	1
H12	T12	30B	UNKNOWN	SYBR	None	1.82771	31.2951	31.2789	0.327534		15.8059	0.218966			-0.87004	TRUE	TRUE	1
Analysis Type	Singleplex
Endogenous Control	U6
RQ Min/Max Confidence Level	95.0
Reference Sample	N1
				N	T
				1	1.64793
				1.75198	0.863393
				3.04216	1.43583
				2.2825	1.14873
				1.77277	1.60881
				2.90683	0.755601
				2.74159	0.573477
				3.1172	0.802811
				2.96646	1.39767
				2.53754	1.39968
				1.34161	2.03416
				2.99699	1.82771

## Sheet: Fig.1Btissue3
Block Type	96alum
Chemistry	SYBR_GREEN
Experiment File Name	D:\wongye\wongye-2020-11-22.eds
Experiment Run End Time	2011-05-31 11:30:04 上午 CST
Instrument Type	sds7500
Passive Reference	ROX
Well	Sample Name	Target Name	Task	Reporter	Quencher	RQ	Cт	Cт Mean	Cт SD	ΔCт	ΔCт Mean	ΔCт SE	HK Control ΔCт Mean	HK Control ΔCт SE	ΔΔCт	Automatic Ct Threshold	Automatic Baseline	Efficiency
A1	N1	U6	UNKNOWN	SYBR	None		12.0984	12.1398	0.100996							TRUE	TRUE	1
A2	T1	U6	UNKNOWN	SYBR	None		13.5046	13.4426	0.171468							TRUE	TRUE	1
A3	N2	U6	UNKNOWN	SYBR	None		12.4019	12.4486	0.00359811							TRUE	TRUE	1
A4	T2	U6	UNKNOWN	SYBR	None		13.205	13.2071	0.0583807							TRUE	TRUE	1
A5	N3	U6	UNKNOWN	SYBR	None		11.695	11.52	0.0148523							TRUE	TRUE	1
A6	T3	U6	UNKNOWN	SYBR	None		15.4277	15.3759	0.181526							TRUE	TRUE	1
A7	N4	U6	UNKNOWN	SYBR	None		13.8695	14.0281	0.271566							TRUE	TRUE	1
A8	T4	U6	UNKNOWN	SYBR	None		13.2011	13.0629	0.069236							TRUE	TRUE	1
A9	N5	U6	UNKNOWN	SYBR	None		14.6076	14.6168	0.0670008							TRUE	TRUE	1
A10	T5	U6	UNKNOWN	SYBR	None		14.8807	14.9937	0.117033							TRUE	TRUE	1
A11	N6	U6	UNKNOWN	SYBR	None		12.2436	12.4623	0.0260842							TRUE	TRUE	1
A12	T6	U6	UNKNOWN	SYBR	None		13.4405	13.6454	0.135712							TRUE	TRUE	1
B1	N1	U6	UNKNOWN	SYBR	None		12.2412	12.1398	0.100996							TRUE	TRUE	1
B2	T1	U6	UNKNOWN	SYBR	None		13.2621	13.4426	0.171468							TRUE	TRUE	1
B3	N2	U6	UNKNOWN	SYBR	None		12.407	12.4486	0.00359811							TRUE	TRUE	1
B4	T2	U6	UNKNOWN	SYBR	None		13.1224	13.2071	0.0583807							TRUE	TRUE	1
B5	N3	U6	UNKNOWN	SYBR	None		11.716	11.52	0.0148523							TRUE	TRUE	1
B6	T3	U6	UNKNOWN	SYBR	None		15.171	15.3759	0.181526							TRUE	TRUE	1
B7	N4	U6	UNKNOWN	SYBR	None		14.2535	14.0281	0.271566							TRUE	TRUE	1
B8	T4	U6	UNKNOWN	SYBR	None		13.1032	13.0629	0.069236							TRUE	TRUE	1
B9	N5	U6	UNKNOWN	SYBR	None		14.7023	14.6168	0.0670008							TRUE	TRUE	1
B10	T5	U6	UNKNOWN	SYBR	None		15.0462	14.9937	0.117033							TRUE	TRUE	1
B11	N6	U6	UNKNOWN	SYBR	None		12.2805	12.4623	0.0260842							TRUE	TRUE	1
B12	T6	U6	UNKNOWN	SYBR	None		13.6324	13.6454	0.135712							TRUE	TRUE	1
C1	N1	30B	UNKNOWN	SYBR	None		23.6044	23.5273	0.20773							TRUE	TRUE	1
C2	T1	30B	UNKNOWN	SYBR	None		23.5737	23.9816	0.0709664							TRUE	TRUE	1
C3	N2	30B	UNKNOWN	SYBR	None		22.8436	22.5249	0.0939117							TRUE	TRUE	1
C4	T2	30B	UNKNOWN	SYBR	None		24.04	24.3311	0.0410325							TRUE	TRUE	1
C5	N3	30B	UNKNOWN	SYBR	None		21.7033	21.3999	0.0178239							TRUE	TRUE	1
C6	T3	30B	UNKNOWN	SYBR	None		26.6028	26.5333	0.139809							TRUE	TRUE	1
C7	N4	30B	UNKNOWN	SYBR	None		25.4445	25.1977	0.125056							TRUE	TRUE	1
C8	T4	30B	UNKNOWN	SYBR	None		23.4871	23.4427	0.248884							TRUE	TRUE	1
C9	N5	30B	UNKNOWN	SYBR	None		24.6046	24.5149	0.033131							TRUE	TRUE	1
C10	T5	30B	UNKNOWN	SYBR	None		26.2955	26.1406	0.188195							TRUE	TRUE	1
C11	N6	30B	UNKNOWN	SYBR	None		22.3729	21.956	0.577025							TRUE	TRUE	1
C12	T6	30B	UNKNOWN	SYBR	None		26.8523	26.6428	0.148671							TRUE	TRUE	1
D1	N1	30B	UNKNOWN	SYBR	None	1	23.3106	23.5273	0.20773		11.3875	0.154363			0	TRUE	TRUE	1
D2	T1	30B	UNKNOWN	SYBR	None	1.80063	23.6741	23.9816	0.0709664		10.539	0.121217			-0.8485	TRUE	TRUE	1
D3	N2	30B	UNKNOWN	SYBR	None	2.48139	22.9764	22.5249	0.0939117		10.0763	0.0451568			-1.31115	TRUE	TRUE	1
D4	T2	30B	UNKNOWN	SYBR	None	1.2004	24.098	24.3311	0.0410325		11.124	0.0497066			-0.263509	TRUE	TRUE	1
D5	N3	30B	UNKNOWN	SYBR	None	2.84328	21.7285	21.3999	0.0178239		9.87993	0.00148578			-1.50755	TRUE	TRUE	1
D6	T3	30B	UNKNOWN	SYBR	None	1.17289	26.8005	26.5333	0.139809		11.1574	0.160667			-0.230067	TRUE	TRUE	1
D7	N4	30B	UNKNOWN	SYBR	None	1.16298	25.2677	25.1977	0.125056		11.1697	0.198311			-0.217829	TRUE	TRUE	1
D8	T4	30B	UNKNOWN	SYBR	None	2.0106	23.1351	23.4427	0.248884		10.3799	0.0898239			-1.00763	TRUE	TRUE	1
D9	N5	30B	UNKNOWN	SYBR	None	2.80772	24.6515	24.5149	0.033131		9.89809	0.0169349			-1.4894	TRUE	TRUE	1
D10	T5	30B	UNKNOWN	SYBR	None	1.18143	26.5617	26.1406	0.188195		11.1469	0.0355813			-0.240538	TRUE	TRUE	1
D11	N6	30B	UNKNOWN	SYBR	None	3.716	21.5568	21.956	0.577025		9.49374	0.301555			-1.89375	TRUE	TRUE	1
D12	T6	30B	UNKNOWN	SYBR	None	0.327628	27.0626	26.6428	0.148671		12.9974	0.00647916			1.60987	TRUE	TRUE	1
E1	N7	U6	UNKNOWN	SYBR	None		13.1417	13.1495	0.00541743							TRUE	TRUE	1
E2	T7	U6	UNKNOWN	SYBR	None		14.5873	14.575	0.154837							TRUE	TRUE	1
E3	N8	U6	UNKNOWN	SYBR	None		15.4768	15.4889	0.074254							TRUE	TRUE	1
E4	T8	U6	UNKNOWN	SYBR	None		11.674	11.6111	0.0196794							TRUE	TRUE	1
E5	N9	U6	UNKNOWN	SYBR	None		14.7227	14.9094	0.270978							TRUE	TRUE	1
E6	T9	U6	UNKNOWN	SYBR	None		11.8441	11.8973	0.0340254							TRUE	TRUE	1
E7	N10	U6	UNKNOWN	SYBR	None		15.081	14.8701	0.201845							TRUE	TRUE	1
E8	T10	U6	UNKNOWN	SYBR	None		14.1052	13.928	0.174282							TRUE	TRUE	1
E9	N11	U6	UNKNOWN	SYBR	None		13.8828	14.0204	0.108245							TRUE	TRUE	1
E10	T11	U6	UNKNOWN	SYBR	None		12.8456	12.9339	0.113991							TRUE	TRUE	1
E11	N12	U6	UNKNOWN	SYBR	None		13.0275	12.9655	0.00665381							TRUE	TRUE	1
E12	T12	U6	UNKNOWN	SYBR	None		12.9865	12.7968	0.123863							TRUE	TRUE	1
F1	N7	U6	UNKNOWN	SYBR	None		13.134	13.1495	0.00541743							TRUE	TRUE	1
F2	T7	U6	UNKNOWN	SYBR	None		14.3683	14.575	0.154837							TRUE	TRUE	1
F3	N8	U6	UNKNOWN	SYBR	None		15.5819	15.4889	0.074254							TRUE	TRUE	1
F4	T8	U6	UNKNOWN	SYBR	None		11.7018	11.6111	0.0196794							TRUE	TRUE	1
F5	N9	U6	UNKNOWN	SYBR	None		15.1059	14.9094	0.270978							TRUE	TRUE	1
F6	T9	U6	UNKNOWN	SYBR	None		11.8922	11.8973	0.0340254							TRUE	TRUE	1
F7	N10	U6	UNKNOWN	SYBR	None		14.7955	14.8701	0.201845							TRUE	TRUE	1
F8	T10	U6	UNKNOWN	SYBR	None		13.8588	13.928	0.174282							TRUE	TRUE	1
F9	N11	U6	UNKNOWN	SYBR	None		14.0358	14.0204	0.108245							TRUE	TRUE	1
F10	T11	U6	UNKNOWN	SYBR	None		13.0069	12.9339	0.113991							TRUE	TRUE	1
F11	N12	U6	UNKNOWN	SYBR	None		13.0369	12.9655	0.00665381							TRUE	TRUE	1
F12	T12	U6	UNKNOWN	SYBR	None		12.8113	12.7968	0.123863							TRUE	TRUE	1
G1	N7	30B	UNKNOWN	SYBR	None		22.524	22.8676	0.407892							TRUE	TRUE	1
G2	T7	30B	UNKNOWN	SYBR	None		26.3134	26.1643	0.144531							TRUE	TRUE	1
G3	N8	30B	UNKNOWN	SYBR	None		25.2463	24.9497	0.493611							TRUE	TRUE	1
G4	T8	30B	UNKNOWN	SYBR	None		22.2723	22.314	0.118566							TRUE	TRUE	1
G5	N9	30B	UNKNOWN	SYBR	None		24.2532	24.3195	0.310162							TRUE	TRUE	1
G6	T9	30B	UNKNOWN	SYBR	None		25.6419	25.235	0.371649							TRUE	TRUE	1
G7	N10	30B	UNKNOWN	SYBR	None		24.6645	24.4044	0.0338986							TRUE	TRUE	1
G8	T10	30B	UNKNOWN	SYBR	None		25.2272	25.1885	0.224624							TRUE	TRUE	1
G9	N11	30B	UNKNOWN	SYBR	None		24.1693	24.4214	0.46276							TRUE	TRUE	1
G10	T11	30B	UNKNOWN	SYBR	None		23.346	23.4354	0.218368							TRUE	TRUE	1
G11	N12	30B	UNKNOWN	SYBR	None		23.8162	24.1936	0.018203							TRUE	TRUE	1
G12	T12	30B	UNKNOWN	SYBR	None		23.9536	24.3073	0.0359211							TRUE	TRUE	1
H1	N7	30B	UNKNOWN	SYBR	None	3.18075	23.1009	22.8676	0.407892		9.71812	0.206655			-1.66937	TRUE	TRUE	1
H2	T7	30B	UNKNOWN	SYBR	None	0.869484	26.109	26.1643	0.144531		11.5893	0.00515335			0.201769	TRUE	TRUE	1
H3	N8	30B	UNKNOWN	SYBR	None	3.80183	24.5482	24.9497	0.493611		9.46079	0.283933			-1.92669	TRUE	TRUE	1
H4	T8	30B	UNKNOWN	SYBR	None	1.60715	22.44	22.314	0.118566		10.703	0.0494434			-0.684507	TRUE	TRUE	1
H5	N9	30B	UNKNOWN	SYBR	None	3.93796	24.6919	24.3195	0.310162		9.41004	0.019592			-1.97745	TRUE	TRUE	1
H6	T9	30B	UNKNOWN	SYBR	None	0.258786	25.1163	25.235	0.371649		13.3377	0.202837			1.95017	TRUE	TRUE	1
H7	N10	30B	UNKNOWN	SYBR	None	3.61302	24.6165	24.4044	0.0338986		9.53428	0.0839734			-1.85321	TRUE	TRUE	1
H8	T10	30B	UNKNOWN	SYBR	None	1.09194	25.5449	25.1885	0.224624		11.2606	0.199453			-0.126899	TRUE	TRUE	1
H9	N11	30B	UNKNOWN	SYBR	None	1.98129	24.8238	24.4214	0.46276		10.401	0.177258			-0.98644	TRUE	TRUE	1
H10	T11	30B	UNKNOWN	SYBR	None	1.84803	23.0372	23.4354	0.218368		10.5015	0.166179			-0.885989	TRUE	TRUE	1
H11	N12	30B	UNKNOWN	SYBR	None	1.11682	23.7905	24.1936	0.018203		11.2281	0.0124284			-0.1594	TRUE	TRUE	1
H12	T12	30B	UNKNOWN	SYBR	None	0.91827	23.9028	24.3073	0.0359211		11.5105	0.0439707			0.12301	TRUE	TRUE	1
Analysis Type	Singleplex
Endogenous Control	U6
RQ Min/Max Confidence Level	95.0
Reference Sample	N1
				N	T
				1	1.80063
				2.48139	1.2004
				2.84328	1.17289
				1.16298	2.0106
				2.80772	1.18143
				3.716	0.327628
				3.18075	0.869484
				3.80183	1.60715
				3.93796	0.258786
				3.61302	1.09194
				1.98129	1.84803
				1.11682	0.91827

## Sheet: Fig.1Btissue4
Block Type	96alum
Chemistry	SYBR_GREEN
Experiment File Name	D:\wongye\wongye-2020-11-22.eds
Experiment Run End Time	2011-05-31 17:43:13 下午 CST
Instrument Type	sds7500
Passive Reference	ROX
Well	Sample Name	Target Name	Task	Reporter	Quencher	RQ	Cт	Cт Mean	Cт SD	ΔCт	ΔCт Mean	ΔCт SE	HK Control ΔCт Mean	HK Control ΔCт SE	ΔΔCт	Automatic Ct Threshold	Automatic Baseline	Efficiency
A1	N1	U6	UNKNOWN	SYBR	None		15.969	15.7531	0.262476							TRUE	TRUE	1
A2	T1	U6	UNKNOWN	SYBR	None		13.052	12.8756	0.00857526							TRUE	TRUE	1
A3	N2	U6	UNKNOWN	SYBR	None		13.8808	13.6475	0.00217908							TRUE	TRUE	1
A4	T2	U6	UNKNOWN	SYBR	None		13.9335	13.9865	0.0832639							TRUE	TRUE	1
A5	N3	U6	UNKNOWN	SYBR	None		13.3507	13.4143	0.0423041							TRUE	TRUE	1
A6	T3	U6	UNKNOWN	SYBR	None		14.6776	14.5485	0.206739							TRUE	TRUE	1
A7	N4	U6	UNKNOWN	SYBR	None		15.2177	15.3969	0.184676							TRUE	TRUE	1
A8	T4	U6	UNKNOWN	SYBR	None		14.0909	14.1944	0.160157							TRUE	TRUE	1
A9	N5	U6	UNKNOWN	SYBR	None		12.3784	12.2929	0.0406848							TRUE	TRUE	1
A10	T5	U6	UNKNOWN	SYBR	None		12.6138	12.5598	0.0910804							TRUE	TRUE	1
A11	N6	U6	UNKNOWN	SYBR	None		15.8975	15.7721	0.0466056							TRUE	TRUE	1
A12	T6	U6	UNKNOWN	SYBR	None		12.9522	12.9561	0.101497							TRUE	TRUE	1
B1	N1	U6	UNKNOWN	SYBR	None		15.5978	15.7531	0.262476							TRUE	TRUE	1
B2	T1	U6	UNKNOWN	SYBR	None		13.0641	12.8756	0.00857526							TRUE	TRUE	1
B3	N2	U6	UNKNOWN	SYBR	None		13.8777	13.6475	0.00217908							TRUE	TRUE	1
B4	T2	U6	UNKNOWN	SYBR	None		14.0512	13.9865	0.0832639							TRUE	TRUE	1
B5	N3	U6	UNKNOWN	SYBR	None		13.4106	13.4143	0.0423041							TRUE	TRUE	1
B6	T3	U6	UNKNOWN	SYBR	None		14.3852	14.5485	0.206739							TRUE	TRUE	1
B7	N4	U6	UNKNOWN	SYBR	None		15.4789	15.3969	0.184676							TRUE	TRUE	1
B8	T4	U6	UNKNOWN	SYBR	None		14.3174	14.1944	0.160157							TRUE	TRUE	1
B9	N5	U6	UNKNOWN	SYBR	None		12.4359	12.2929	0.0406848							TRUE	TRUE	1
B10	T5	U6	UNKNOWN	SYBR	None		12.485	12.5598	0.0910804							TRUE	TRUE	1
B11	N6	U6	UNKNOWN	SYBR	None		15.8316	15.7721	0.0466056							TRUE	TRUE	1
B12	T6	U6	UNKNOWN	SYBR	None		12.8087	12.9561	0.101497							TRUE	TRUE	1
C1	N1	30B	UNKNOWN	SYBR	None		25.6543	25.6083	0.0968571							TRUE	TRUE	1
C2	T1	30B	UNKNOWN	SYBR	None		21.9593	21.9769	0.0212615							TRUE	TRUE	1
C3	N2	30B	UNKNOWN	SYBR	None		22.676	22.7592	0.119436							TRUE	TRUE	1
C4	T2	30B	UNKNOWN	SYBR	None		24.0468	23.9594	0.259873							TRUE	TRUE	1
C5	N3	30B	UNKNOWN	SYBR	None		21.981	21.7576	0.435854							TRUE	TRUE	1
C6	T3	30B	UNKNOWN	SYBR	None		25.337	24.9164	0.362751							TRUE	TRUE	1
C7	N4	30B	UNKNOWN	SYBR	None		24.2459	24.1842	0.273685							TRUE	TRUE	1
C8	T4	30B	UNKNOWN	SYBR	None		25.0913	25.3256	0.120684							TRUE	TRUE	1
C9	N5	30B	UNKNOWN	SYBR	None		20.6146	20.4587	0.0734468							TRUE	TRUE	1
C10	T5	30B	UNKNOWN	SYBR	None		22.341	21.9353	0.118904							TRUE	TRUE	1
C11	N6	30B	UNKNOWN	SYBR	None		23.9882	23.6324	0.322375							TRUE	TRUE	1
C12	T6	30B	UNKNOWN	SYBR	None		23.4213	23.6402	0.111044							TRUE	TRUE	1
D1	N1	30B	UNKNOWN	SYBR	None	1	25.5173	25.6083	0.0968571		9.85518	0.0828095			0	TRUE	TRUE	1
D2	T1	30B	UNKNOWN	SYBR	None	1.68624	21.9292	21.9769	0.0212615		9.10137	0.0149184			-0.75381	TRUE	TRUE	1
D3	N2	30B	UNKNOWN	SYBR	None	1.67422	22.5071	22.7592	0.119436		9.1117	0.0586283			-0.743486	TRUE	TRUE	1
D4	T2	30B	UNKNOWN	SYBR	None	0.921642	23.6793	23.9594	0.259873		9.97291	0.171568			0.117722	TRUE	TRUE	1
D5	N3	30B	UNKNOWN	SYBR	None	2.85174	21.3646	21.7576	0.435854		8.34334	0.239079			-1.51184	TRUE	TRUE	1
D6	T3	30B	UNKNOWN	SYBR	None	0.700895	24.824	24.9164	0.362751		10.3679	0.0780057			0.51273	TRUE	TRUE	1
D7	N4	30B	UNKNOWN	SYBR	None	2.0964	23.8589	24.1842	0.273685		8.78727	0.22918			-1.06791	TRUE	TRUE	1
D8	T4	30B	UNKNOWN	SYBR	None	0.412937	24.9206	25.3256	0.120684		11.1312	0.14042			1.27601	TRUE	TRUE	1
D9	N5	30B	UNKNOWN	SYBR	None	3.22524	20.7185	20.4587	0.0734468		8.16578	0.016381			-1.68941	TRUE	TRUE	1
D10	T5	30B	UNKNOWN	SYBR	None	1.39452	22.1729	21.9353	0.118904		9.37542	0.013912			-0.479764	TRUE	TRUE	1
D11	N6	30B	UNKNOWN	SYBR	None	3.98604	23.5323	23.6324	0.322375		7.86023	0.137885			-1.99496	TRUE	TRUE	1
D12	T6	30B	UNKNOWN	SYBR	None	0.562962	23.5783	23.6402	0.111044		10.6841	0.10627			0.828891	TRUE	TRUE	1
E1	N7	U6	UNKNOWN	SYBR	None		14.8085	14.7765	0.116651							TRUE	TRUE	1
E2	T7	U6	UNKNOWN	SYBR	None		12.4174	12.23	0.0319523							TRUE	TRUE	1
E3	N8	U6	UNKNOWN	SYBR	None		11.8451	12.0239	0.299222							TRUE	TRUE	1
E4	T8	U6	UNKNOWN	SYBR	None		12.1888	12.2936	0.0715356							TRUE	TRUE	1
E5	N9	U6	UNKNOWN	SYBR	None		15.2099	15.2197	0.0176245							TRUE	TRUE	1
E6	T9	U6	UNKNOWN	SYBR	None		15.6033	15.7443	0.0832711							TRUE	TRUE	1
E7	N10	U6	UNKNOWN	SYBR	None		11.7391	11.9776	0.123986							TRUE	TRUE	1
E8	T10	U6	UNKNOWN	SYBR	None		15.5795	15.4767	0.0936468							TRUE	TRUE	1
E9	N11	U6	UNKNOWN	SYBR	None		14.8311	15.0035	0.121465							TRUE	TRUE	1
E10	T11	U6	UNKNOWN	SYBR	None		13.8866	14.0948	0.0135129							TRUE	TRUE	1
E11	N12	U6	UNKNOWN	SYBR	None		15.0067	15.1935	0.148809							TRUE	TRUE	1
E12	T12	U6	UNKNOWN	SYBR	None		12.0334	12.0117	0.1075							TRUE	TRUE	1
F1	N7	U6	UNKNOWN	SYBR	None		14.6435	14.7765	0.116651							TRUE	TRUE	1
F2	T7	U6	UNKNOWN	SYBR	None		12.3722	12.23	0.0319523							TRUE	TRUE	1
F3	N8	U6	UNKNOWN	SYBR	None		12.2682	12.0239	0.299222							TRUE	TRUE	1
F4	T8	U6	UNKNOWN	SYBR	None		12.0876	12.2936	0.0715356							TRUE	TRUE	1
F5	N9	U6	UNKNOWN	SYBR	None		15.2348	15.2197	0.0176245							TRUE	TRUE	1
F6	T9	U6	UNKNOWN	SYBR	None		15.721	15.7443	0.0832711							TRUE	TRUE	1
F7	N10	U6	UNKNOWN	SYBR	None		11.9145	11.9776	0.123986							TRUE	TRUE	1
F8	T10	U6	UNKNOWN	SYBR	None		15.7119	15.4767	0.0936468							TRUE	TRUE	1
F9	N11	U6	UNKNOWN	SYBR	None		15.0029	15.0035	0.121465							TRUE	TRUE	1
F10	T11	U6	UNKNOWN	SYBR	None		13.8675	14.0948	0.0135129							TRUE	TRUE	1
F11	N12	U6	UNKNOWN	SYBR	None		15.2171	15.1935	0.148809							TRUE	TRUE	1
F12	T12	U6	UNKNOWN	SYBR	None		11.8814	12.0117	0.1075							TRUE	TRUE	1
G1	N7	30B	UNKNOWN	SYBR	None		23.8065	23.731	0.0691765							TRUE	TRUE	1
G2	T7	30B	UNKNOWN	SYBR	None		27.043	27.2886	0.174809							TRUE	TRUE	1
G3	N8	30B	UNKNOWN	SYBR	None		20.4566	20.7058	0.47546							TRUE	TRUE	1
G4	T8	30B	UNKNOWN	SYBR	None		20.7988	21.0612	0.202536							TRUE	TRUE	1
G5	N9	30B	UNKNOWN	SYBR	None		23.7417	23.481	0.170651							TRUE	TRUE	1
G6	T9	30B	UNKNOWN	SYBR	None		25.1102	24.9501	0.347096							TRUE	TRUE	1
G7	N10	30B	UNKNOWN	SYBR	None		20.6717	21.0999	0.341005							TRUE	TRUE	1
G8	T10	30B	UNKNOWN	SYBR	None		25.7002	25.8273	0.00882324							TRUE	TRUE	1
G9	N11	30B	UNKNOWN	SYBR	None		23.6587	23.8116	0.119682							TRUE	TRUE	1
G10	T11	30B	UNKNOWN	SYBR	None		25.7459	25.3053	0.552412							TRUE	TRUE	1
G11	N12	30B	UNKNOWN	SYBR	None		23.3598	23.4251	0.0566362							TRUE	TRUE	1
G12	T12	30B	UNKNOWN	SYBR	None		22.7185	23.1526	0.127129							TRUE	TRUE	1
H1	N7	30B	UNKNOWN	SYBR	None	1.86689	23.7086	23.731	0.0691765		8.95455	0.0237373			-0.900637	TRUE	TRUE	1
H2	T7	30B	UNKNOWN	SYBR	None	0.0271399	27.2902	27.2886	0.174809		15.0586	0.103381			5.20344	TRUE	TRUE	1
H3	N8	30B	UNKNOWN	SYBR	None	2.25537	21.129	20.7058	0.47546		8.68182	0.0881189			-1.17336	TRUE	TRUE	1
H4	T8	30B	UNKNOWN	SYBR	None	2.12518	21.0852	21.0612	0.202536		8.7676	0.137036			-1.08758	TRUE	TRUE	1
H5	N9	30B	UNKNOWN	SYBR	None	3.01852	23.5003	23.481	0.170651		8.26134	0.0941377			-1.59384	TRUE	TRUE	1
H6	T9	30B	UNKNOWN	SYBR	None	1.56849	24.6194	24.9501	0.347096		9.20581	0.215184			-0.649374	TRUE	TRUE	1
H7	N10	30B	UNKNOWN	SYBR	None	1.66193	21.154	21.0999	0.341005		9.12232	0.108509			-0.732858	TRUE	TRUE	1
H8	T10	30B	UNKNOWN	SYBR	None	0.709349	25.7127	25.8273	0.00882324		10.3506	0.0424118			0.495433	TRUE	TRUE	1
H9	N11	30B	UNKNOWN	SYBR	None	2.06631	23.4894	23.8116	0.119682		8.80813	0.120574			-1.04706	TRUE	TRUE	1
H10	T11	30B	UNKNOWN	SYBR	None	0.39086	24.9646	25.3053	0.552412		11.2105	0.269449			1.35528	TRUE	TRUE	1
H11	N12	30B	UNKNOWN	SYBR	None	3.0815	23.4399	23.4251	0.0566362		8.23155	0.0460864			-1.62363	TRUE	TRUE	1
H12	T12	30B	UNKNOWN	SYBR	None	0.410171	22.8983	23.1526	0.127129		11.1409	0.117314			1.2857	TRUE	TRUE	1
Analysis Type	Singleplex
Endogenous Control	U6
RQ Min/Max Confidence Level	95.0
Reference Sample	N1
				N	T
				1	1.68624
				1.67422	0.921642
				2.85174	0.700895
				2.0964	0.412937
				3.22524	1.39452
				3.98604	0.562962
				1.86689	0.0271399
				2.25537	2.12518
				3.01852	1.56849
				1.66193	0.709349
				2.06631	0.39086
				3.0815	0.410171

## Sheet: Fig.1Btissue5
Block Type	96alum
Chemistry	SYBR_GREEN
Experiment File Name	D:\wongye\wongye-2020-11-22.eds
Experiment Run End Time	2011-05-31 17:43:13 下午 CST
Instrument Type	sds7500
Passive Reference	ROX
Well	Sample Name	Target Name	Task	Reporter	Quencher	RQ	Cт	Cт Mean	Cт SD	ΔCт	ΔCт Mean	ΔCт SE	HK Control ΔCт Mean	HK Control ΔCт SE	ΔΔCт	Automatic Ct Threshold	Automatic Baseline	Efficiency
A1	N1	U6	UNKNOWN	SYBR	None		15.969	15.7531	0.262476							TRUE	TRUE	1
A2	T1	U6	UNKNOWN	SYBR	None		13.052	12.8756	0.00857526							TRUE	TRUE	1
A3	N2	U6	UNKNOWN	SYBR	None		13.8808	13.6475	0.00217908							TRUE	TRUE	1
A4	T2	U6	UNKNOWN	SYBR	None		13.9335	13.9865	0.0832639							TRUE	TRUE	1
A5	N3	U6	UNKNOWN	SYBR	None		13.3507	13.4143	0.0423041							TRUE	TRUE	1
A6	T3	U6	UNKNOWN	SYBR	None		14.6776	14.5485	0.206739							TRUE	TRUE	1
A7	N4	U6	UNKNOWN	SYBR	None		15.2177	15.3969	0.184676							TRUE	TRUE	1
A8	T4	U6	UNKNOWN	SYBR	None		14.0909	14.1944	0.160157							TRUE	TRUE	1
A9	N5	U6	UNKNOWN	SYBR	None		12.3784	12.2929	0.0406848							TRUE	TRUE	1
A10	T5	U6	UNKNOWN	SYBR	None		12.6138	12.5598	0.0910804							TRUE	TRUE	1
A11	N6	U6	UNKNOWN	SYBR	None		15.8975	15.7721	0.0466056							TRUE	TRUE	1
A12	T6	U6	UNKNOWN	SYBR	None		12.9522	12.9561	0.101497							TRUE	TRUE	1
B1	N1	U6	UNKNOWN	SYBR	None		15.5978	15.7531	0.262476							TRUE	TRUE	1
B2	T1	U6	UNKNOWN	SYBR	None		13.0641	12.8756	0.00857526							TRUE	TRUE	1
B3	N2	U6	UNKNOWN	SYBR	None		13.8777	13.6475	0.00217908							TRUE	TRUE	1
B4	T2	U6	UNKNOWN	SYBR	None		14.0512	13.9865	0.0832639							TRUE	TRUE	1
B5	N3	U6	UNKNOWN	SYBR	None		13.4106	13.4143	0.0423041							TRUE	TRUE	1
B6	T3	U6	UNKNOWN	SYBR	None		14.3852	14.5485	0.206739							TRUE	TRUE	1
B7	N4	U6	UNKNOWN	SYBR	None		15.4789	15.3969	0.184676							TRUE	TRUE	1
B8	T4	U6	UNKNOWN	SYBR	None		14.3174	14.1944	0.160157							TRUE	TRUE	1
B9	N5	U6	UNKNOWN	SYBR	None		12.4359	12.2929	0.0406848							TRUE	TRUE	1
B10	T5	U6	UNKNOWN	SYBR	None		12.485	12.5598	0.0910804							TRUE	TRUE	1
B11	N6	U6	UNKNOWN	SYBR	None		15.8316	15.7721	0.0466056							TRUE	TRUE	1
B12	T6	U6	UNKNOWN	SYBR	None		12.8087	12.9561	0.101497							TRUE	TRUE	1
C1	N1	30B	UNKNOWN	SYBR	None		25.6543	25.6083	0.0968571							TRUE	TRUE	1
C2	T1	30B	UNKNOWN	SYBR	None		21.9593	21.9769	0.0212615							TRUE	TRUE	1
C3	N2	30B	UNKNOWN	SYBR	None		22.676	22.7592	0.119436							TRUE	TRUE	1
C4	T2	30B	UNKNOWN	SYBR	None		24.0468	23.9594	0.259873							TRUE	TRUE	1
C5	N3	30B	UNKNOWN	SYBR	None		21.981	21.7576	0.435854							TRUE	TRUE	1
C6	T3	30B	UNKNOWN	SYBR	None		25.337	24.9164	0.362751							TRUE	TRUE	1
C7	N4	30B	UNKNOWN	SYBR	None		24.2459	24.1842	0.273685							TRUE	TRUE	1
C8	T4	30B	UNKNOWN	SYBR	None		25.0913	25.3256	0.120684							TRUE	TRUE	1
C9	N5	30B	UNKNOWN	SYBR	None		20.6146	20.4587	0.0734468							TRUE	TRUE	1
C10	T5	30B	UNKNOWN	SYBR	None		22.341	21.9353	0.118904							TRUE	TRUE	1
C11	N6	30B	UNKNOWN	SYBR	None		23.9882	23.6324	0.322375							TRUE	TRUE	1
C12	T6	30B	UNKNOWN	SYBR	None		23.4213	23.6402	0.111044							TRUE	TRUE	1
D1	N1	30B	UNKNOWN	SYBR	None	1	25.5173	25.6083	0.0968571		9.85518	0.0828095			0	TRUE	TRUE	1
D2	T1	30B	UNKNOWN	SYBR	None	1.68624	21.9292	21.9769	0.0212615		9.10137	0.0149184			-0.75381	TRUE	TRUE	1
D3	N2	30B	UNKNOWN	SYBR	None	1.67422	22.5071	22.7592	0.119436		9.1117	0.0586283			-0.743486	TRUE	TRUE	1
D4	T2	30B	UNKNOWN	SYBR	None	0.921642	23.6793	23.9594	0.259873		9.97291	0.171568			0.117722	TRUE	TRUE	1
D5	N3	30B	UNKNOWN	SYBR	None	2.85174	21.3646	21.7576	0.435854		8.34334	0.239079			-1.51184	TRUE	TRUE	1
D6	T3	30B	UNKNOWN	SYBR	None	0.700895	24.824	24.9164	0.362751		10.3679	0.0780057			0.51273	TRUE	TRUE	1
D7	N4	30B	UNKNOWN	SYBR	None	2.0964	23.8589	24.1842	0.273685		8.78727	0.22918			-1.06791	TRUE	TRUE	1
D8	T4	30B	UNKNOWN	SYBR	None	0.412937	24.9206	25.3256	0.120684		11.1312	0.14042			1.27601	TRUE	TRUE	1
D9	N5	30B	UNKNOWN	SYBR	None	3.22524	20.7185	20.4587	0.0734468		8.16578	0.016381			-1.68941	TRUE	TRUE	1
D10	T5	30B	UNKNOWN	SYBR	None	1.39452	22.1729	21.9353	0.118904		9.37542	0.013912			-0.479764	TRUE	TRUE	1
D11	N6	30B	UNKNOWN	SYBR	None	3.98604	23.5323	23.6324	0.322375		7.86023	0.137885			-1.99496	TRUE	TRUE	1
D12	T6	30B	UNKNOWN	SYBR	None	0.562962	23.5783	23.6402	0.111044		10.6841	0.10627			0.828891	TRUE	TRUE	1
E1	N7	U6	UNKNOWN	SYBR	None		14.8085	14.7765	0.116651							TRUE	TRUE	1
E2	T7	U6	UNKNOWN	SYBR	None		12.4174	12.23	0.0319523							TRUE	TRUE	1
E3	N8	U6	UNKNOWN	SYBR	None		11.8451	12.0239	0.299222							TRUE	TRUE	1
E4	T8	U6	UNKNOWN	SYBR	None		12.1888	12.2936	0.0715356							TRUE	TRUE	1
E5	N9	U6	UNKNOWN	SYBR	None		15.2099	15.2197	0.0176245							TRUE	TRUE	1
E6	T9	U6	UNKNOWN	SYBR	None		15.6033	15.7443	0.0832711							TRUE	TRUE	1
E7	N10	U6	UNKNOWN	SYBR	None		11.7391	11.9776	0.123986							TRUE	TRUE	1
E8	T10	U6	UNKNOWN	SYBR	None		15.5795	15.4767	0.0936468							TRUE	TRUE	1
E9	N11	U6	UNKNOWN	SYBR	None		14.8311	15.0035	0.121465							TRUE	TRUE	1
E10	T11	U6	UNKNOWN	SYBR	None		13.8866	14.0948	0.0135129							TRUE	TRUE	1
E11	N12	U6	UNKNOWN	SYBR	None		15.0067	15.1935	0.148809							TRUE	TRUE	1
E12	T12	U6	UNKNOWN	SYBR	None		12.0334	12.0117	0.1075							TRUE	TRUE	1
F1	N7	U6	UNKNOWN	SYBR	None		14.6435	14.7765	0.116651							TRUE	TRUE	1
F2	T7	U6	UNKNOWN	SYBR	None		12.3722	12.23	0.0319523							TRUE	TRUE	1
F3	N8	U6	UNKNOWN	SYBR	None		12.2682	12.0239	0.299222							TRUE	TRUE	1
F4	T8	U6	UNKNOWN	SYBR	None		12.0876	12.2936	0.0715356							TRUE	TRUE	1
F5	N9	U6	UNKNOWN	SYBR	None		15.2348	15.2197	0.0176245							TRUE	TRUE	1
F6	T9	U6	UNKNOWN	SYBR	None		15.721	15.7443	0.0832711							TRUE	TRUE	1
F7	N10	U6	UNKNOWN	SYBR	None		11.9145	11.9776	0.123986							TRUE	TRUE	1
F8	T10	U6	UNKNOWN	SYBR	None		15.7119	15.4767	0.0936468							TRUE	TRUE	1
F9	N11	U6	UNKNOWN	SYBR	None		15.0029	15.0035	0.121465							TRUE	TRUE	1
F10	T11	U6	UNKNOWN	SYBR	None		13.8675	14.0948	0.0135129							TRUE	TRUE	1
F11	N12	U6	UNKNOWN	SYBR	None		15.2171	15.1935	0.148809							TRUE	TRUE	1
F12	T12	U6	UNKNOWN	SYBR	None		11.8814	12.0117	0.1075							TRUE	TRUE	1
G1	N7	30B	UNKNOWN	SYBR	None		23.8065	23.731	0.0691765							TRUE	TRUE	1
G2	T7	30B	UNKNOWN	SYBR	None		27.043	27.2886	0.174809							TRUE	TRUE	1
G3	N8	30B	UNKNOWN	SYBR	None		20.4566	20.7058	0.47546							TRUE	TRUE	1
G4	T8	30B	UNKNOWN	SYBR	None		20.7988	21.0612	0.202536							TRUE	TRUE	1
G5	N9	30B	UNKNOWN	SYBR	None		23.7417	23.481	0.170651							TRUE	TRUE	1
G6	T9	30B	UNKNOWN	SYBR	None		25.1102	24.9501	0.347096							TRUE	TRUE	1
G7	N10	30B	UNKNOWN	SYBR	None		20.6717	21.0999	0.341005							TRUE	TRUE	1
G8	T10	30B	UNKNOWN	SYBR	None		25.7002	25.8273	0.00882324							TRUE	TRUE	1
G9	N11	30B	UNKNOWN	SYBR	None		23.6587	23.8116	0.119682							TRUE	TRUE	1
G10	T11	30B	UNKNOWN	SYBR	None		25.7459	25.3053	0.552412							TRUE	TRUE	1
G11	N12	30B	UNKNOWN	SYBR	None		23.3598	23.4251	0.0566362							TRUE	TRUE	1
G12	T12	30B	UNKNOWN	SYBR	None		22.7185	23.1526	0.127129							TRUE	TRUE	1
H1	N7	30B	UNKNOWN	SYBR	None	1.86689	23.7086	23.731	0.0691765		8.95455	0.0237373			-0.900637	TRUE	TRUE	1
H2	T7	30B	UNKNOWN	SYBR	None	0.0271399	27.2902	27.2886	0.174809		15.0586	0.103381			5.20344	TRUE	TRUE	1
H3	N8	30B	UNKNOWN	SYBR	None	2.25537	21.129	20.7058	0.47546		8.68182	0.0881189			-1.17336	TRUE	TRUE	1
H4	T8	30B	UNKNOWN	SYBR	None	2.12518	21.0852	21.0612	0.202536		8.7676	0.137036			-1.08758	TRUE	TRUE	1
H5	N9	30B	UNKNOWN	SYBR	None	3.01852	23.5003	23.481	0.170651		8.26134	0.0941377			-1.59384	TRUE	TRUE	1
H6	T9	30B	UNKNOWN	SYBR	None	1.56849	24.6194	24.9501	0.347096		9.20581	0.215184			-0.649374	TRUE	TRUE	1
H7	N10	30B	UNKNOWN	SYBR	None	1.66193	21.154	21.0999	0.341005		9.12232	0.108509			-0.732858	TRUE	TRUE	1
H8	T10	30B	UNKNOWN	SYBR	None	0.709349	25.7127	25.8273	0.00882324		10.3506	0.0424118			0.495433	TRUE	TRUE	1
H9	N11	30B	UNKNOWN	SYBR	None	2.06631	23.4894	23.8116	0.119682		8.80813	0.120574			-1.04706	TRUE	TRUE	1
H10	T11	30B	UNKNOWN	SYBR	None	0.39086	24.9646	25.3053	0.552412		11.2105	0.269449			1.35528	TRUE	TRUE	1
H11	N12	30B	UNKNOWN	SYBR	None	3.0815	23.4399	23.4251	0.0566362		8.23155	0.0460864			-1.62363	TRUE	TRUE	1
H12	T12	30B	UNKNOWN	SYBR	None	0.410171	22.8983	23.1526	0.127129		11.1409	0.117314			1.2857	TRUE	TRUE	1
Analysis Type	Singleplex
Endogenous Control	U6
RQ Min/Max Confidence Level	95.0
Reference Sample	N1
				N	T
				1	1.68624
				1.67422	0.921642
				2.85174	0.700895
				2.0964	0.412937
				3.22524	1.39452
				3.98604	0.562962
				1.86689	0.0271399
				2.25537	2.12518
				3.01852	1.56849
				1.66193	0.709349
				2.06631	0.39086
				3.0815	0.410171

## Sheet: Fig.1Fcells
Block Type	96alum
Chemistry	SYBR_GREEN
Experiment File Name	D:\wongye\wongye-2020-12-07.eds
Experiment Run End Time	2011-06-15 11:21:13 上午 CST
Instrument Type	sds7500
Passive Reference	ROX
Well	Sample Name	Target Name	Task	Reporter	Quencher	RQ	Cт	Cт Mean	Cт SD	ΔCт	ΔCт Mean	ΔCт SE	HK Control ΔCт Mean	HK Control ΔCт SE	ΔΔCт	Automatic Ct Threshold	Automatic Baseline	Efficiency
A1	THY	U6	UNKNOWN	SYBR	None		22.7134	22.4905	0.273745							TRUE	TRUE	1
A2	K1	U6	UNKNOWN	SYBR	None		18.7436	18.5721	0.0700986							TRUE	TRUE	1
A3	KTC-1	U6	UNKNOWN	SYBR	None		18.1135	18.1332	0.0228405							TRUE	TRUE	1
A4	TPC-1	U6	UNKNOWN	SYBR	None		18.0756	18.2021	0.211987							TRUE	TRUE	1
A5	B-CPAP	U6	UNKNOWN	SYBR	None		15.0251	15.2559	0.0609436							TRUE	TRUE	1
A6	THY	U6	UNKNOWN	SYBR	None		22.0398	21.8615	0.0791229							TRUE	TRUE	1
A7	K1	U6	UNKNOWN	SYBR	None		19.532	19.284	0.199707							TRUE	TRUE	1
A8	KTC-1	U6	UNKNOWN	SYBR	None		19.466	19.6004	0.0244492							TRUE	TRUE	1
A9	TPC-1	U6	UNKNOWN	SYBR	None		17.3867	17.3418	0.0914896							TRUE	TRUE	1
A10	B-CPAP	U6	UNKNOWN	SYBR	None		15.5296	15.6982	0.142327							TRUE	TRUE	1
B1	THY	U6	UNKNOWN	SYBR	None		22.3262	22.4905	0.273745							TRUE	TRUE	1
B2	K1	U6	UNKNOWN	SYBR	None		18.6445	18.5721	0.0700986							TRUE	TRUE	1
B3	KTC-1	U6	UNKNOWN	SYBR	None		18.0812	18.1332	0.0228405							TRUE	TRUE	1
B4	TPC-1	U6	UNKNOWN	SYBR	None		18.3754	18.2021	0.211987							TRUE	TRUE	1
B5	B-CPAP	U6	UNKNOWN	SYBR	None		15.1113	15.2559	0.0609436							TRUE	TRUE	1
B6	THY	U6	UNKNOWN	SYBR	None		21.9279	21.8615	0.0791229							TRUE	TRUE	1
B7	K1	U6	UNKNOWN	SYBR	None		19.2496	19.284	0.199707							TRUE	TRUE	1
B8	KTC-1	U6	UNKNOWN	SYBR	None		19.5006	19.6004	0.0244492							TRUE	TRUE	1
B9	TPC-1	U6	UNKNOWN	SYBR	None		17.2573	17.3418	0.0914896							TRUE	TRUE	1
B10	B-CPAP	U6	UNKNOWN	SYBR	None		15.7309	15.6982	0.142327							TRUE	TRUE	1
C1	THY	30B	UNKNOWN	SYBR	None		29.4973	29.3756	0.18396							TRUE	TRUE	1
C2	K1	30B	UNKNOWN	SYBR	None		25.8802	25.9512	0.201399							TRUE	TRUE	1
C3	KTC-1	30B	UNKNOWN	SYBR	None		23.0357	22.8648	0.0345425							TRUE	TRUE	1
C4	TPC-1	30B	UNKNOWN	SYBR	None		21.1024	21.2449	0.028882							TRUE	TRUE	1
C5	B-CPAP	30B	UNKNOWN	SYBR	None		24.1077	23.9789	0.31955							TRUE	TRUE	1
C6	THY	30B	UNKNOWN	SYBR	None		28.6056	28.6678	0.0832102							TRUE	TRUE	1
C7	K1	30B	UNKNOWN	SYBR	None		26.822	26.6537	0.355652							TRUE	TRUE	1
C8	KTC-1	30B	UNKNOWN	SYBR	None		24.3645	24.1825	0.0451302							TRUE	TRUE	1
C9	TPC-1	30B	UNKNOWN	SYBR	None		20.4898	20.2482	0.307591							TRUE	TRUE	1
C10	B-CPAP	30B	UNKNOWN	SYBR	None		25.4374	25.4738	0.309632							TRUE	TRUE	1
D1	THY	30B	UNKNOWN	SYBR	None	1	29.2372	29.3756	0.18396		6.88512	0.0448928			0	TRUE	TRUE	1
D2	K1	30B	UNKNOWN	SYBR	None	0.71005	26.165	25.9512	0.201399		7.37912	0.135749			0.494008	TRUE	TRUE	1
D3	KTC-1	30B	UNKNOWN	SYBR	None	4.44904	22.9869	22.8648	0.0345425		4.73162	0.00585101			-2.15349	TRUE	TRUE	1
D4	TPC-1	30B	UNKNOWN	SYBR	None	14.343	21.0615	21.2449	0.028882		3.04285	0.120435			-3.84227	TRUE	TRUE	1
D5	B-CPAP	30B	UNKNOWN	SYBR	None	0.279731	23.6558	23.9789	0.31955		8.72301	0.190247			1.83789	TRUE	TRUE	1
D6	THY	30B	UNKNOWN	SYBR	None	1.05615	28.488	28.6678	0.0832102		6.8063	0.00204365			-0.078821	TRUE	TRUE	1
D7	K1	30B	UNKNOWN	SYBR	None	0.714699	26.319	26.6537	0.355652		7.36971	0.0779723			0.484592	TRUE	TRUE	1
D8	KTC-1	30B	UNKNOWN	SYBR	None	4.93506	24.3007	24.1825	0.0451302		4.58205	0.0347897			-2.30307	TRUE	TRUE	1
D9	TPC-1	30B	UNKNOWN	SYBR	None	15.7657	20.0548	20.2482	0.307591		2.9064	0.108051			-3.97872	TRUE	TRUE	1
D10	B-CPAP	30B	UNKNOWN	SYBR	None	0.134859	25.8753	25.4738	0.309632		9.77559	0.0836521			2.89047	TRUE	TRUE	1
E1	THY	U6	UNKNOWN	SYBR	None		21.5319	21.7221	0.156632							TRUE	TRUE	1
E2	K1	U6	UNKNOWN	SYBR	None		19.5669	19.8127	0.293291							TRUE	TRUE	1
E3	KTC-1	U6	UNKNOWN	SYBR	None		19.5211	19.7334	0.182852							TRUE	TRUE	1
E4	TPC-1	U6	UNKNOWN	SYBR	None		18.571	18.8155	0.050494							TRUE	TRUE	1
E5	B-CPAP	U6	UNKNOWN	SYBR	None		15.7987	15.8107	0.100439							TRUE	TRUE	1
E6	THY	U6	UNKNOWN	SYBR	None		21.4814	21.3119	0.1217							TRUE	TRUE	1
E7	K1	U6	UNKNOWN	SYBR	None		18.2383	18.2989	0.0773215							TRUE	TRUE	1
E8	KTC-1	U6	UNKNOWN	SYBR	None		17.8721	18.0064	0.152892							TRUE	TRUE	1
E9	TPC-1	U6	UNKNOWN	SYBR	None		19.3413	19.1278	0.0618651							TRUE	TRUE	1
E10	B-CPAP	U6	UNKNOWN	SYBR	None		15.4086	15.4755	0.0177008							TRUE	TRUE	1
F1	THY	U6	UNKNOWN	SYBR	None		21.7534	21.7221	0.156632							TRUE	TRUE	1
F2	K1	U6	UNKNOWN	SYBR	None		19.9817	19.8127	0.293291							TRUE	TRUE	1
F3	KTC-1	U6	UNKNOWN	SYBR	None		19.7797	19.7334	0.182852							TRUE	TRUE	1
F4	TPC-1	U6	UNKNOWN	SYBR	None		18.6424	18.8155	0.050494							TRUE	TRUE	1
F5	B-CPAP	U6	UNKNOWN	SYBR	None		15.9407	15.8107	0.100439							TRUE	TRUE	1
F6	THY	U6	UNKNOWN	SYBR	None		21.3093	21.3119	0.1217							TRUE	TRUE	1
F7	K1	U6	UNKNOWN	SYBR	None		18.3477	18.2989	0.0773215							TRUE	TRUE	1
F8	KTC-1	U6	UNKNOWN	SYBR	None		18.0884	18.0064	0.152892							TRUE	TRUE	1
F9	TPC-1	U6	UNKNOWN	SYBR	None		19.2538	19.1278	0.0618651							TRUE	TRUE	1
F10	B-CPAP	U6	UNKNOWN	SYBR	None		15.4336	15.4755	0.0177008							TRUE	TRUE	1
G1	THY	30B	UNKNOWN	SYBR	None		28.7664	28.7656	0.0112261							TRUE	TRUE	1
G2	K1	30B	UNKNOWN	SYBR	None		26.9119	27.0599	0.235263							TRUE	TRUE	1
G3	KTC-1	30B	UNKNOWN	SYBR	None		24.6535	24.4472	0.0613817							TRUE	TRUE	1
G4	TPC-1	30B	UNKNOWN	SYBR	None		21.7865	21.7265	0.0893137							TRUE	TRUE	1
G5	B-CPAP	30B	UNKNOWN	SYBR	None		25.0392	24.6703	0.503918							TRUE	TRUE	1
G6	THY	30B	UNKNOWN	SYBR	None		28.8522	28.5596	0.235675							TRUE	TRUE	1
G7	K1	30B	UNKNOWN	SYBR	None		25.3865	25.5835	0.0740626							TRUE	TRUE	1
G8	KTC-1	30B	UNKNOWN	SYBR	None		22.6435	22.4954	0.0866797							TRUE	TRUE	1
G9	TPC-1	30B	UNKNOWN	SYBR	None		22.0761	22.0721	0.116661							TRUE	TRUE	1
G10	B-CPAP	30B	UNKNOWN	SYBR	None		24.0426	24.1927	0.00714801							TRUE	TRUE	1
H1	THY	30B	UNKNOWN	SYBR	None	0.895971	28.7822	28.7656	0.0112261		7.04359	0.0727029			0.158477	TRUE	TRUE	1
H2	K1	30B	UNKNOWN	SYBR	None	0.778025	27.2446	27.0599	0.235263		7.24723	0.029014			0.362111	TRUE	TRUE	1
H3	KTC-1	30B	UNKNOWN	SYBR	None	4.5043	24.5667	24.4472	0.0613817		4.71382	0.122117			-2.1713	TRUE	TRUE	1
H4	TPC-1	30B	UNKNOWN	SYBR	None	15.7152	21.6602	21.7265	0.0893137		2.91103	0.0699038			-3.97409	TRUE	TRUE	1
H5	B-CPAP	30B	UNKNOWN	SYBR	None	0.254459	24.3265	24.6703	0.503918		8.85961	0.302178			1.9745	TRUE	TRUE	1
H6	THY	30B	UNKNOWN	SYBR	None	0.777736	28.5189	28.5596	0.235675		7.24777	0.0569877			0.362648	TRUE	TRUE	1
H7	K1	30B	UNKNOWN	SYBR	None	0.758097	25.4912	25.5835	0.0740626		7.28466	0.00162943			0.399547	TRUE	TRUE	1
H8	KTC-1	30B	UNKNOWN	SYBR	None	5.26376	22.5209	22.4954	0.0866797		4.48902	0.119786			-2.39609	TRUE	TRUE	1
H9	TPC-1	30B	UNKNOWN	SYBR	None	15.3569	21.9111	22.0721	0.116661		2.9443	0.0273978			-3.94081	TRUE	TRUE	1
H10	B-CPAP	30B	UNKNOWN	SYBR	None	0.280853	24.0528	24.1927	0.00714801		8.71723	0.00527641			1.83211	TRUE	TRUE	1
Analysis Type	Singleplex
Endogenous Control	U6
RQ Min/Max Confidence Level	95.0
Reference Sample	N1
									1	0.71005	4.44904	14.343	0.279731
									1.05615	0.714699	4.93506	15.7657	0.134859
									0.895971	0.778025	4.5043	15.7152	0.254459
									0.777736	0.758097	5.26376	15.3569	0.280853

## Sheet: Fig.2A
Block Type	96alum
Chemistry	SYBR_GREEN
Experiment File Name	D:\wongye\wongye-2021-01-16.eds
Experiment Run End Time	2011-08-08 09:31:20 上午 CST
Instrument Type	sds7500
Passive Reference	ROX
Well	Sample Name	Target Name	Task	Reporter	Quencher	RQ	Cт	Cт Mean	Cт SD	ΔCт	ΔCт Mean	ΔCт SE	HK Control ΔCт Mean	HK Control ΔCт SE	ΔΔCт	Automatic Ct Threshold	Automatic Baseline	Efficiency
A1	NM	U6	UNKNOWN	SYBR	None		19.3688	19.1907	0.123136							TRUE	TRUE	1
A2	30M	U6	UNKNOWN	SYBR	None		18.7061	18.483	0.262181							TRUE	TRUE	1
A3	NM	U6	UNKNOWN	SYBR	None		15.4119	15.6125	0.307937							TRUE	TRUE	1
A4	30M	U6	UNKNOWN	SYBR	None		14.4076	14.3508	0.020612							TRUE	TRUE	1
A5	NM	U6	UNKNOWN	SYBR	None		19.6713	19.6999	0.0365127							TRUE	TRUE	1
A6	30M	U6	UNKNOWN	SYBR	None		18.7959	18.7217	0.0351267							TRUE	TRUE	1
A7	NM	U6	UNKNOWN	SYBR	None		14.2617	14.4749	0.190592							TRUE	TRUE	1
A8	30M	U6	UNKNOWN	SYBR	None		16.6158	16.7819	0.167551							TRUE	TRUE	1
A9	NM	U6	UNKNOWN	SYBR	None		18.6865	18.6171	0.0731249							TRUE	TRUE	1
A10	30M	U6	UNKNOWN	SYBR	None		17.7711	17.7153	0.0626431							TRUE	TRUE	1
A11	NM	U6	UNKNOWN	SYBR	None		16.2726	16.0931	0.0476832							TRUE	TRUE	1
A12	30M	U6	UNKNOWN	SYBR	None		16.9229	16.8082	0.0326742							TRUE	TRUE	1
B1	NM	U6	UNKNOWN	SYBR	None		19.1946	19.1907	0.123136							TRUE	TRUE	1
B2	30M	U6	UNKNOWN	SYBR	None		18.3354	18.483	0.262181							TRUE	TRUE	1
B3	NM	U6	UNKNOWN	SYBR	None		15.8474	15.6125	0.307937							TRUE	TRUE	1
B4	30M	U6	UNKNOWN	SYBR	None		14.3784	14.3508	0.020612							TRUE	TRUE	1
B5	NM	U6	UNKNOWN	SYBR	None		19.6196	19.6999	0.0365127							TRUE	TRUE	1
B6	30M	U6	UNKNOWN	SYBR	None		18.7462	18.7217	0.0351267							TRUE	TRUE	1
B7	NM	U6	UNKNOWN	SYBR	None		14.5313	14.4749	0.190592							TRUE	TRUE	1
B8	30M	U6	UNKNOWN	SYBR	None		16.8527	16.7819	0.167551							TRUE	TRUE	1
B9	NM	U6	UNKNOWN	SYBR	None		18.583	18.6171	0.0731249							TRUE	TRUE	1
B10	30M	U6	UNKNOWN	SYBR	None		17.8597	17.7153	0.0626431							TRUE	TRUE	1
B11	NM	U6	UNKNOWN	SYBR	None		16.2052	16.0931	0.0476832							TRUE	TRUE	1
B12	30M	U6	UNKNOWN	SYBR	None		16.8767	16.8082	0.0326742							TRUE	TRUE	1
C1	NM	30B	UNKNOWN	SYBR	None		27.756	27.7542	0.0688476							TRUE	TRUE	1
C2	30M	30B	UNKNOWN	SYBR	None		15.4462	15.2495	0.12771							TRUE	TRUE	1
C3	NM	30B	UNKNOWN	SYBR	None		25.263	24.9398	0.110125							TRUE	TRUE	1
C4	30M	30B	UNKNOWN	SYBR	None		10.4684	10.6386	0.178953							TRUE	TRUE	1
C5	NM	30B	UNKNOWN	SYBR	None		28.0434	27.7184	0.327149							TRUE	TRUE	1
C6	30M	30B	UNKNOWN	SYBR	None		15.5885	15.4248	0.0459263							TRUE	TRUE	1
C7	NM	30B	UNKNOWN	SYBR	None		23.2023	23.3189	0.125278							TRUE	TRUE	1
C8	30M	30B	UNKNOWN	SYBR	None		13.2821	13.0912	0.26416							TRUE	TRUE	1
C9	NM	30B	UNKNOWN	SYBR	None		26.4713	26.761	0.359074							TRUE	TRUE	1
C10	30M	30B	UNKNOWN	SYBR	None		14.3119	14.4658	0.073097							TRUE	TRUE	1
C11	NM	30B	UNKNOWN	SYBR	None		23.9594	23.8398	0.284598							TRUE	TRUE	1
C12	30M	30B	UNKNOWN	SYBR	None		13.3588	13.2098	0.166276							TRUE	TRUE	1
D1	NM	30B	UNKNOWN	SYBR	None	1	27.8534	27.7542	0.0688476		8.56349	0.0959916			0	TRUE	TRUE	1
D2	30M	30B	UNKNOWN	SYBR	None	3558.25	15.2656	15.2495	0.12771		-3.23347	0.0672353			-11.797	TRUE	TRUE	1
D3	NM	30B	UNKNOWN	SYBR	None	0.588925	25.1072	24.9398	0.110125		9.32733	0.209031			0.763843	TRUE	TRUE	1
D4	30M	30B	UNKNOWN	SYBR	None	4958.65	10.7215	10.6386	0.178953		-3.71225	0.0997827			-12.2757	TRUE	TRUE	1
D5	NM	30B	UNKNOWN	SYBR	None	1.459	27.5807	27.7184	0.327149		8.01851	0.145318			-0.544975	TRUE	TRUE	1
D6	30M	30B	UNKNOWN	SYBR	None	3718.26	15.5236	15.4248	0.0459263		-3.29693	0.00539981			-11.8604	TRUE	TRUE	1
D7	NM	30B	UNKNOWN	SYBR	None	0.823285	23.0252	23.3189	0.125278		8.84402	0.157935			0.280536	TRUE	TRUE	1
D8	30M	30B	UNKNOWN	SYBR	None	4885.06	12.9085	13.0912	0.26416		-3.69067	0.215855			-12.2542	TRUE	TRUE	1
D9	NM	30B	UNKNOWN	SYBR	None	1.33758	26.9791	26.761	0.359074		8.14386	0.216099			-0.419623	TRUE	TRUE	1
D10	30M	30B	UNKNOWN	SYBR	None	3598	14.4153	14.4658	0.073097		-3.24949	0.00522696			-11.813	TRUE	TRUE	1
D11	NM	30B	UNKNOWN	SYBR	None	1.7615	23.5569	23.8398	0.284598		7.74668	0.118457			-0.816802	TRUE	TRUE	1
D12	30M	30B	UNKNOWN	SYBR	None	4582.2	13.1237	13.2098	0.166276		-3.59834	0.0668009			-12.1618	TRUE	TRUE	1
Analysis Type	Singleplex
Endogenous Control	U6
RQ Min/Max Confidence Level	95.0
Reference Sample	N1
				N	T
				1	3558.25
				0.588925	4958.65
				1.459	3718.26
				0.823285	4885.06
				1.33758	3598
				1.7615	4582.2

## Sheet: Fig.4B-K1
K1
Block Type	96alum
Chemistry	SYBR_GREEN
Experiment File Name	D:\wongye\wongye-2021-01-27.eds
Experiment Run End Time	2011-08-19 10:05:12 上午 CST
Instrument Type	sds7500
Passive Reference	ROX
Well	Sample Name	Target Name	Task	Reporter	Quencher	RQ	Cт	Cт Mean	Cт SD	ΔCт	ΔCт Mean	ΔCт SE	HK Control ΔCт Mean	HK Control ΔCт SE	ΔΔCт	Automatic Ct Threshold	Automatic Baseline	Efficiency
A1	NM	A	UNKNOWN	SYBR	None		20.3942	20.4095	0.0710331							TRUE	TRUE	1
A2	30M	A	UNKNOWN	SYBR	None		20.5384	20.6735	0.167475							TRUE	TRUE	1
A3	NI	A	UNKNOWN	SYBR	None		20.9987	21.0132	0.0322731							TRUE	TRUE	1
A4	30I	A	UNKNOWN	SYBR	None		21.5783	21.6834	0.0420695							TRUE	TRUE	1
A5	NM	A	UNKNOWN	SYBR	None		20.2406	20.0107	0.00150227							TRUE	TRUE	1
A6	30M	A	UNKNOWN	SYBR	None		20.4696	20.4377	0.134325							TRUE	TRUE	1
A7	NI	A	UNKNOWN	SYBR	None		20.1058	20.3263	0.164666							TRUE	TRUE	1
A8	30I	A	UNKNOWN	SYBR	None		21.3378	21.529	0.120391							TRUE	TRUE	1
A9	NM	A	UNKNOWN	SYBR	None		20.2026	20.1009	0.062293							TRUE	TRUE	1
A10	30M	A	UNKNOWN	SYBR	None		21.1393	21.0256	0.16658							TRUE	TRUE	1
A11	NI	A	UNKNOWN	SYBR	None		19.3083	19.5105	0.0227275							TRUE	TRUE	1
A12	30I	A	UNKNOWN	SYBR	None		20.3874	20.4861	0.103519							TRUE	TRUE	1
B1	NM	A	UNKNOWN	SYBR	None		20.4947	20.4095	0.0710331							TRUE	TRUE	1
B2	30M	A	UNKNOWN	SYBR	None		20.7753	20.6735	0.167475							TRUE	TRUE	1
B3	NI	A	UNKNOWN	SYBR	None		21.0444	21.0132	0.0322731							TRUE	TRUE	1
B4	30I	A	UNKNOWN	SYBR	None		21.5188	21.6834	0.0420695							TRUE	TRUE	1
B5	NM	A	UNKNOWN	SYBR	None		20.2427	20.0107	0.00150227							TRUE	TRUE	1
B6	30M	A	UNKNOWN	SYBR	None		20.6596	20.4377	0.134325							TRUE	TRUE	1
B7	NI	A	UNKNOWN	SYBR	None		20.3387	20.3263	0.164666							TRUE	TRUE	1
B8	30I	A	UNKNOWN	SYBR	None		21.5081	21.529	0.120391							TRUE	TRUE	1
B9	NM	A	UNKNOWN	SYBR	None		20.1146	20.1009	0.062293							TRUE	TRUE	1
B10	30M	A	UNKNOWN	SYBR	None		20.9037	21.0256	0.16658							TRUE	TRUE	1
B11	NI	A	UNKNOWN	SYBR	None		19.2761	19.5105	0.0227275							TRUE	TRUE	1
B12	30I	A	UNKNOWN	SYBR	None		20.241	20.4861	0.103519							TRUE	TRUE	1
C1	NM	G	UNKNOWN	SYBR	None		30.1204	29.957	0.36293							TRUE	TRUE	1
C2	30M	G	UNKNOWN	SYBR	None		30.8013	30.7938	0.230019							TRUE	TRUE	1
C3	NI	G	UNKNOWN	SYBR	None		30.3815	30.025	0.0792915							TRUE	TRUE	1
C4	30I	G	UNKNOWN	SYBR	None		30.368	30.5442	0.141446							TRUE	TRUE	1
C5	NM	G	UNKNOWN	SYBR	None		29.81	29.6128	0.292329							TRUE	TRUE	1
C6	30M	G	UNKNOWN	SYBR	None		30.4939	30.7318	0.194994							TRUE	TRUE	1
C7	NI	G	UNKNOWN	SYBR	None		29.1872	29.4726	0.334812							TRUE	TRUE	1
C8	30I	G	UNKNOWN	SYBR	None		30.229	30.4393	0.357822							TRUE	TRUE	1
C9	NM	G	UNKNOWN	SYBR	None		29.0295	29.3587	0.108306							TRUE	TRUE	1
C10	30M	G	UNKNOWN	SYBR	None		30.9684	31.1462	0.101303							TRUE	TRUE	1
C11	NI	G	UNKNOWN	SYBR	None		28.4694	28.463	0.00155438							TRUE	TRUE	1
C12	30I	G	UNKNOWN	SYBR	None		29.1724	29.3431	0.321223							TRUE	TRUE	1
D1	NM	G	UNKNOWN	SYBR	None	1	29.6072	29.957	0.36293		9.5475	0.216981			0	TRUE	TRUE	1
D2	30M	G	UNKNOWN	SYBR	None	0.672281	31.1266	30.7938	0.230019		10.1204	0.0312721			0.572865	TRUE	TRUE	1
D3	NI	G	UNKNOWN	SYBR	None	1.44968	30.2693	30.025	0.0792915		9.01177	0.0557823			-0.53573	TRUE	TRUE	1
D4	30I	G	UNKNOWN	SYBR	None	1.60957	30.568	30.5442	0.141446		8.86083	0.0917577			-0.686672	TRUE	TRUE	1
D5	NM	G	UNKNOWN	SYBR	None	0.962847	29.3966	29.6128	0.292329		9.60213	0.146916			0.0546218	TRUE	TRUE	1
D6	30M	G	UNKNOWN	SYBR	None	0.596041	30.7696	30.7318	0.194994		10.294	0.0303347			0.746517	TRUE	TRUE	1
D7	NI	G	UNKNOWN	SYBR	None	1.32065	29.6607	29.4726	0.334812		9.14626	0.0850728			-0.401243	TRUE	TRUE	1
D8	30I	G	UNKNOWN	SYBR	None	1.55534	30.735	30.4393	0.357822		8.91027	0.118716			-0.637231	TRUE	TRUE	1
D9	NM	G	UNKNOWN	SYBR	None	1.22238	29.1827	29.3587	0.108306		9.25781	0.0852996			-0.289696	TRUE	TRUE	1
D10	30M	G	UNKNOWN	SYBR	None	0.67217	31.1117	31.1462	0.101303		10.1206	0.133942			0.573103	TRUE	TRUE	1
D11	NI	G	UNKNOWN	SYBR	None	1.51048	28.4672	28.463	0.00155438		8.9525	0.0105866			-0.595006	TRUE	TRUE	1
D12	30I	G	UNKNOWN	SYBR	None	1.61395	29.6266	29.3431	0.321223		8.85691	0.212371			-0.690595	TRUE	TRUE	1
E1	NM	A	UNKNOWN	SYBR	None		20.6585	20.4732	0.236532							TRUE	TRUE	1
E2	30M	A	UNKNOWN	SYBR	None		20.5721	20.3728	0.151996							TRUE	TRUE	1
E3	NI	A	UNKNOWN	SYBR	None		20.8688	21.0822	0.216068							TRUE	TRUE	1
E4	30I	A	UNKNOWN	SYBR	None		19.8096	19.6764	0.00673968							TRUE	TRUE	1
E5	NM	A	UNKNOWN	SYBR	None		21.1381	21.2215	0.0508076							TRUE	TRUE	1
E6	30M	A	UNKNOWN	SYBR	None		19.4774	19.5823	0.0606265							TRUE	TRUE	1
E7	NI	A	UNKNOWN	SYBR	None		20.8224	20.6275	0.107525							TRUE	TRUE	1
E8	30I	A	UNKNOWN	SYBR	None		21.1137	20.9728	0.0136709							TRUE	TRUE	1
E9	NM	A	UNKNOWN	SYBR	None		20.5702	20.6147	0.108119							TRUE	TRUE	1
E10	30M	A	UNKNOWN	SYBR	None		20.4924	20.3969	0.0488956							TRUE	TRUE	1
E11	NI	A	UNKNOWN	SYBR	None		21.0202	21.1825	0.0793161							TRUE	TRUE	1
E12	30I	A	UNKNOWN	SYBR	None		21.2819	21.1013	0.106071							TRUE	TRUE	1
F1	NM	A	UNKNOWN	SYBR	None		20.324	20.4732	0.236532							TRUE	TRUE	1
F2	30M	A	UNKNOWN	SYBR	None		20.3572	20.3728	0.151996							TRUE	TRUE	1
F3	NI	A	UNKNOWN	SYBR	None		21.1744	21.0822	0.216068							TRUE	TRUE	1
F4	30I	A	UNKNOWN	SYBR	None		19.8001	19.6764	0.00673968							TRUE	TRUE	1
F5	NM	A	UNKNOWN	SYBR	None		21.0662	21.2215	0.0508076							TRUE	TRUE	1
F6	30M	A	UNKNOWN	SYBR	None		19.3917	19.5823	0.0606265							TRUE	TRUE	1
F7	NI	A	UNKNOWN	SYBR	None		20.6703	20.6275	0.107525							TRUE	TRUE	1
F8	30I	A	UNKNOWN	SYBR	None		21.133	20.9728	0.0136709							TRUE	TRUE	1
F9	NM	A	UNKNOWN	SYBR	None		20.7231	20.6147	0.108119							TRUE	TRUE	1
F10	30M	A	UNKNOWN	SYBR	None		20.5616	20.3969	0.0488956							TRUE	TRUE	1
F11	NI	A	UNKNOWN	SYBR	None		21.1324	21.1825	0.0793161							TRUE	TRUE	1
F12	30I	A	UNKNOWN	SYBR	None		21.1319	21.1013	0.106071							TRUE	TRUE	1
G1	NM	G	UNKNOWN	SYBR	None		29.8852	29.7311	0.298637							TRUE	TRUE	1
G2	30M	G	UNKNOWN	SYBR	None		30.27	30.5593	0.295009							TRUE	TRUE	1
G3	NI	G	UNKNOWN	SYBR	None		29.7889	30.0801	0.323537							TRUE	TRUE	1
G4	30I	G	UNKNOWN	SYBR	None		28.2292	28.5898	0.434301							TRUE	TRUE	1
G5	NM	G	UNKNOWN	SYBR	None		30.9217	30.6208	0.367832							TRUE	TRUE	1
G6	30M	G	UNKNOWN	SYBR	None		29.6182	29.7003	0.243067							TRUE	TRUE	1
G7	NI	G	UNKNOWN	SYBR	None		29.3888	29.5971	0.0352592							TRUE	TRUE	1
G8	30I	G	UNKNOWN	SYBR	None		29.6378	29.841	0.157342							TRUE	TRUE	1
G9	NM	G	UNKNOWN	SYBR	None		29.5222	29.8786	0.0527964							TRUE	TRUE	1
G10	30M	G	UNKNOWN	SYBR	None		30.1355	30.4398	0.372974							TRUE	TRUE	1
G11	NI	G	UNKNOWN	SYBR	None		30.1913	30.2191	0.215493							TRUE	TRUE	1
G12	30I	G	UNKNOWN	SYBR	None		30.2562	29.9146	0.264305							TRUE	TRUE	1
H1	NM	G	UNKNOWN	SYBR	None	1.22225	29.4629	29.7311	0.298637		9.25797	0.0310524			-0.289535	TRUE	TRUE	1
H2	30M	G	UNKNOWN	SYBR	None	0.642179	30.6872	30.5593	0.295009		10.1865	0.223503			0.638953	TRUE	TRUE	1
H3	NI	G	UNKNOWN	SYBR	None	1.46373	30.2464	30.0801	0.323537		8.99785	0.0537345			-0.549654	TRUE	TRUE	1
H4	30I	G	UNKNOWN	SYBR	None	1.55204	28.8434	28.5898	0.434301		8.91334	0.22052			-0.634167	TRUE	TRUE	1
H5	NM	G	UNKNOWN	SYBR	None	1.10818	30.4015	30.6208	0.367832		9.39931	0.158512			-0.148197	TRUE	TRUE	1
H6	30M	G	UNKNOWN	SYBR	None	0.67339	29.962	29.7003	0.243067		10.118	0.151847			0.570485	TRUE	TRUE	1
H7	NI	G	UNKNOWN	SYBR	None	1.49267	29.4387	29.5971	0.0352592		8.9696	0.0713922			-0.5779	TRUE	TRUE	1
H8	30I	G	UNKNOWN	SYBR	None	1.60136	29.8603	29.841	0.157342		8.86821	0.0718354			-0.679296	TRUE	TRUE	1
H9	NM	G	UNKNOWN	SYBR	None	1.21724	29.5969	29.8786	0.0527964		9.26389	0.0276613			-0.283613	TRUE	TRUE	1
H10	30M	G	UNKNOWN	SYBR	None	0.709367	30.663	30.4398	0.372974		10.0429	0.162039			0.495396	TRUE	TRUE	1
H11	NI	G	UNKNOWN	SYBR	None	1.42501	29.8866	30.2191	0.215493		9.03653	0.147405			-0.510972	TRUE	TRUE	1
H12	30I	G	UNKNOWN	SYBR	None	1.66354	29.8824	29.9146	0.264305		8.81325	0.0791171			-0.734257	TRUE	TRUE	1

## Sheet: Fig.4B-B-CPAP
B-CPAP
Block Type	96alum
Chemistry	SYBR_GREEN
Experiment File Name	D:\wongye\wongye-2021-01-27.eds
Experiment Run End Time	2011-08-19 15:43:10 下午 CST
Instrument Type	sds7500
Passive Reference	ROX
Well	Sample Name	Target Name	Task	Reporter	Quencher	RQ	Cт	Cт Mean	Cт SD	ΔCт	ΔCт Mean	ΔCт SE	HK Control ΔCт Mean	HK Control ΔCт SE	ΔΔCт	Automatic Ct Threshold	Automatic Baseline	Efficiency
A1	NM	A	UNKNOWN	SYBR	None		19.5085	19.4856	0.0448335							TRUE	TRUE	1
A2	30M	A	UNKNOWN	SYBR	None		20.0822	19.9901	0.0695532							TRUE	TRUE	1
A3	NI	A	UNKNOWN	SYBR	None		19.6989	19.6945	0.117721							TRUE	TRUE	1
A4	30I	A	UNKNOWN	SYBR	None		21.4083	21.6302	0.0480969							TRUE	TRUE	1
A5	NM	A	UNKNOWN	SYBR	None		19.2083	19.3142	0.14818							TRUE	TRUE	1
A6	30M	A	UNKNOWN	SYBR	None		19.4405	19.2852	0.264335							TRUE	TRUE	1
A7	NI	A	UNKNOWN	SYBR	None		21.9238	21.7154	0.13831							TRUE	TRUE	1
A8	30I	A	UNKNOWN	SYBR	None		20.8115	20.9729	0.00382773							TRUE	TRUE	1
A9	NM	A	UNKNOWN	SYBR	None		21.3729	21.6045	0.205089							TRUE	TRUE	1
A10	30M	A	UNKNOWN	SYBR	None		21.5781	21.8036	0.190533							TRUE	TRUE	1
A11	NI	A	UNKNOWN	SYBR	None		20.4036	20.4662	0.123373							TRUE	TRUE	1
A12	30I	A	UNKNOWN	SYBR	None		20.2972	20.2355	0.0700853							TRUE	TRUE	1
B1	NM	A	UNKNOWN	SYBR	None		19.4451	19.4856	0.0448335							TRUE	TRUE	1
B2	30M	A	UNKNOWN	SYBR	None		19.9838	19.9901	0.0695532							TRUE	TRUE	1
B3	NI	A	UNKNOWN	SYBR	None		19.8654	19.6945	0.117721							TRUE	TRUE	1
B4	30I	A	UNKNOWN	SYBR	None		21.4763	21.6302	0.0480969							TRUE	TRUE	1
B5	NM	A	UNKNOWN	SYBR	None		19.4179	19.3142	0.14818							TRUE	TRUE	1
B6	30M	A	UNKNOWN	SYBR	None		19.0666	19.2852	0.264335							TRUE	TRUE	1
B7	NI	A	UNKNOWN	SYBR	None		21.7282	21.7154	0.13831							TRUE	TRUE	1
B8	30I	A	UNKNOWN	SYBR	None		20.8169	20.9729	0.00382773							TRUE	TRUE	1
B9	NM	A	UNKNOWN	SYBR	None		21.6629	21.6045	0.205089							TRUE	TRUE	1
B10	30M	A	UNKNOWN	SYBR	None		21.8475	21.8036	0.190533							TRUE	TRUE	1
B11	NI	A	UNKNOWN	SYBR	None		20.5781	20.4662	0.123373							TRUE	TRUE	1
B12	30I	A	UNKNOWN	SYBR	None		20.198	20.2355	0.0700853							TRUE	TRUE	1
C1	NM	G	UNKNOWN	SYBR	None		28.9506	28.7396	0.259707							TRUE	TRUE	1
C2	30M	G	UNKNOWN	SYBR	None		30.3326	30.0974	0.073972							TRUE	TRUE	1
C3	NI	G	UNKNOWN	SYBR	None		28.6457	28.9973	0.0180434							TRUE	TRUE	1
C4	30I	G	UNKNOWN	SYBR	None		30.7893	30.7112	0.109204							TRUE	TRUE	1
C5	NM	G	UNKNOWN	SYBR	None		28.4654	28.2363	0.22517							TRUE	TRUE	1
C6	30M	G	UNKNOWN	SYBR	None		29.541	29.3357	0.258993							TRUE	TRUE	1
C7	NI	G	UNKNOWN	SYBR	None		31.1415	30.969	0.0846708							TRUE	TRUE	1
C8	30I	G	UNKNOWN	SYBR	None		30.0582	29.8957	0.322076							TRUE	TRUE	1
C9	NM	G	UNKNOWN	SYBR	None		30.6262	30.6883	0.153602							TRUE	TRUE	1
C10	30M	G	UNKNOWN	SYBR	None		31.6034	31.8727	0.311648							TRUE	TRUE	1
C11	NI	G	UNKNOWN	SYBR	None		30.1084	29.8208	0.0503553							TRUE	TRUE	1
C12	30I	G	UNKNOWN	SYBR	None		29.5248	29.2814	0.375866							TRUE	TRUE	1
D1	NM	G	UNKNOWN	SYBR	None	1	28.5833	28.7396	0.259707		9.25405	0.107437			0	TRUE	TRUE	1
D2	30M	G	UNKNOWN	SYBR	None	0.553545	30.4372	30.0974	0.073972		10.1073	0.0717626			0.853227	TRUE	TRUE	1
D3	NI	G	UNKNOWN	SYBR	None	0.966808	28.6713	28.9973	0.0180434		9.30275	0.0498387			0.0486985	TRUE	TRUE	1
D4	30I	G	UNKNOWN	SYBR	None	1.12743	30.9438	30.7112	0.109204		9.08102	0.0305535			-0.173036	TRUE	TRUE	1
D5	NM	G	UNKNOWN	SYBR	None	1.25869	28.147	28.2363	0.22517		8.92213	0.186675			-0.331918	TRUE	TRUE	1
D6	30M	G	UNKNOWN	SYBR	None	0.575763	29.1747	29.3357	0.258993		10.0505	0.00267117			0.796453	TRUE	TRUE	1
D7	NI	G	UNKNOWN	SYBR	None	1.00027	31.2612	30.969	0.0846708		9.25366	0.11149			-0.000391161	TRUE	TRUE	1
D8	30I	G	UNKNOWN	SYBR	None	1.25806	29.6027	29.8957	0.322076		8.92285	0.162952			-0.331205	TRUE	TRUE	1
D9	NM	G	UNKNOWN	SYBR	None	1.12531	30.8435	30.6883	0.153602		9.08373	0.0257435			-0.170322	TRUE	TRUE	1
D10	30M	G	UNKNOWN	SYBR	None	0.568376	32.0441	31.8727	0.311648		10.0691	0.0605573			0.815084	TRUE	TRUE	1
D11	NI	G	UNKNOWN	SYBR	None	0.93263	30.1796	29.8208	0.0503553		9.35468	0.0365089			0.100624	TRUE	TRUE	1
D12	30I	G	UNKNOWN	SYBR	None	1.15515	28.9932	29.2814	0.375866		9.04597	0.15289			-0.208086	TRUE	TRUE	1
E1	NM	A	UNKNOWN	SYBR	None		19.2932	19.3454	0.0250583							TRUE	TRUE	1
E2	30M	A	UNKNOWN	SYBR	None		20.2626	20.3917	0.0627084							TRUE	TRUE	1
E3	NI	A	UNKNOWN	SYBR	None		21.7048	21.5364	0.0285902							TRUE	TRUE	1
E4	30I	A	UNKNOWN	SYBR	None		19.9243	19.7619	0.0889377							TRUE	TRUE	1
E5	NM	A	UNKNOWN	SYBR	None		20.8916	20.8114	0.189958							TRUE	TRUE	1
E6	30M	A	UNKNOWN	SYBR	None		21.0752	21.0441	0.0678986							TRUE	TRUE	1
E7	NI	A	UNKNOWN	SYBR	None		20.359	20.1481	0.181891							TRUE	TRUE	1
E8	30I	A	UNKNOWN	SYBR	None		21.075	20.8981	0.161065							TRUE	TRUE	1
E9	NM	A	UNKNOWN	SYBR	None		19.1488	19.3585	0.0323663							TRUE	TRUE	1
E10	30M	A	UNKNOWN	SYBR	None		19.4327	19.371	0.0461321							TRUE	TRUE	1
E11	NI	A	UNKNOWN	SYBR	None		20.7816	20.6038	0.143331							TRUE	TRUE	1
E12	30I	A	UNKNOWN	SYBR	None		21.1029	21.2608	0.125912							TRUE	TRUE	1
F1	NM	A	UNKNOWN	SYBR	None		19.3286	19.3454	0.0250583							TRUE	TRUE	1
F2	30M	A	UNKNOWN	SYBR	None		20.174	20.3917	0.0627084							TRUE	TRUE	1
F3	NI	A	UNKNOWN	SYBR	None		21.6643	21.5364	0.0285902							TRUE	TRUE	1
F4	30I	A	UNKNOWN	SYBR	None		19.7985	19.7619	0.0889377							TRUE	TRUE	1
F5	NM	A	UNKNOWN	SYBR	None		20.6229	20.8114	0.189958							TRUE	TRUE	1
F6	30M	A	UNKNOWN	SYBR	None		20.9792	21.0441	0.0678986							TRUE	TRUE	1
F7	NI	A	UNKNOWN	SYBR	None		20.1017	20.1481	0.181891							TRUE	TRUE	1
F8	30I	A	UNKNOWN	SYBR	None		20.8473	20.8981	0.161065							TRUE	TRUE	1
F9	NM	A	UNKNOWN	SYBR	None		19.1945	19.3585	0.0323663							TRUE	TRUE	1
F10	30M	A	UNKNOWN	SYBR	None		19.3674	19.371	0.0461321							TRUE	TRUE	1
F11	NI	A	UNKNOWN	SYBR	None		20.5789	20.6038	0.143331							TRUE	TRUE	1
F12	30I	A	UNKNOWN	SYBR	None		21.2809	21.2608	0.125912							TRUE	TRUE	1
G1	NM	G	UNKNOWN	SYBR	None		29.2203	28.9276	0.18372							TRUE	TRUE	1
G2	30M	G	UNKNOWN	SYBR	None		30.1381	30.4454	0.0368946							TRUE	TRUE	1
G3	NI	G	UNKNOWN	SYBR	None		30.7384	30.9053	0.241795							TRUE	TRUE	1
G4	30I	G	UNKNOWN	SYBR	None		28.57	28.8307	0.089622							TRUE	TRUE	1
G5	NM	G	UNKNOWN	SYBR	None		29.4282	29.7384	0.465675							TRUE	TRUE	1
G6	30M	G	UNKNOWN	SYBR	None		31.2356	31.0977	0.0540741							TRUE	TRUE	1
G7	NI	G	UNKNOWN	SYBR	None		29.9137	29.6099	0.290474							TRUE	TRUE	1
G8	30I	G	UNKNOWN	SYBR	None		29.8096	29.863	0.105901							TRUE	TRUE	1
G9	NM	G	UNKNOWN	SYBR	None		28.6449	28.4931	0.277726							TRUE	TRUE	1
G10	30M	G	UNKNOWN	SYBR	None		29.2399	29.4893	0.348607							TRUE	TRUE	1
G11	NI	G	UNKNOWN	SYBR	None		30.1279	30.0074	0.0481787							TRUE	TRUE	1
G12	30I	G	UNKNOWN	SYBR	None		30.128	30.2338	0.229779							TRUE	TRUE	1
H1	NM	G	UNKNOWN	SYBR	None	0.796566	28.9605	28.9276	0.18372		9.58219	0.104389			0.328135	TRUE	TRUE	1
H2	30M	G	UNKNOWN	SYBR	None	0.574467	30.1903	30.4454	0.0368946		10.0538	0.0498015			0.799704	TRUE	TRUE	1
H3	NI	G	UNKNOWN	SYBR	None	0.923504	31.0804	30.9053	0.241795		9.36886	0.135193			0.114811	TRUE	TRUE	1
H4	30I	G	UNKNOWN	SYBR	None	1.13701	28.6968	28.8307	0.089622		9.0688	0.0892799			-0.185248	TRUE	TRUE	1
H5	NM	G	UNKNOWN	SYBR	None	1.25441	30.0867	29.7384	0.465675		8.92704	0.327817			-0.327008	TRUE	TRUE	1
H6	30M	G	UNKNOWN	SYBR	None	0.574543	31.1591	31.0977	0.0540741		10.0536	0.00691223			0.799513	TRUE	TRUE	1
H7	NI	G	UNKNOWN	SYBR	None	0.865875	29.5029	29.6099	0.290474		9.46182	0.0542917			0.20777	TRUE	TRUE	1
H8	30I	G	UNKNOWN	SYBR	None	1.22196	29.6598	29.863	0.105901		8.96485	0.0275821			-0.2892	TRUE	TRUE	1
H9	NM	G	UNKNOWN	SYBR	None	1.08629	28.2522	28.4931	0.277726		9.13464	0.155046			-0.119412	TRUE	TRUE	1
H10	30M	G	UNKNOWN	SYBR	None	0.549331	29.7329	29.4893	0.348607		10.1183	0.19737			0.864253	TRUE	TRUE	1
H11	NI	G	UNKNOWN	SYBR	None	0.901556	30.0598	30.0074	0.0481787		9.40356	0.0475762			0.149511	TRUE	TRUE	1
H12	30I	G	UNKNOWN	SYBR	None	1.21509	30.453	30.2338	0.229779		8.97299	0.0519333			-0.281059	TRUE	TRUE	1
Analysis Type	Singleplex
Endogenous Control	A
RQ Min/Max Confidence Level	95.0
Reference Sample	NM
				1	0.553545	0.966808	1.12743
				1.25869	0.575763	1.00027	1.25806
				1.12531	0.568376	0.93263	1.15515
				0.796566	0.574467	0.923504	1.13701
				1.25441	0.574543	0.865875	1.22196
				1.08629	0.549331	0.901556	1.21509

[truncated: 4 more sheets: Fig.5A-K1, Fig.5A-B-CPAP, Fig.5C-K1, Fig.5-B-CPAP]
