# Supplementary material for: miR-30b-5p inhibits proliferation, invasion, and migration of papillary thyroid cancer by targeting GALNT7 via the EGFR/PI3K/AKT pathway
Source: Cancer Cell Int. 2021 Nov 24;21:618. doi: 10.1186/s12935-021-02323-x (PMC8611849; doi:10.1186/s12935-021-02323-x)
Supplement: Supplementary file 2 — Additional file 2. The clinical characteristics of 60 patients with papillary thyroid carcinoma. [file 12935_2021_2323_MOESM2_ESM.xlsx]

## Sheet: Sheet1
NO.	2-ΔΔCt	Class	age	gender	Stage	T	M	N
51	1.96946	2	61	FEMALE	Stage I	T1	M0	N0
44	2.12518	2	43	FEMALE	Stage I	T1	M0	N0
23	2.03416	2	41	FEMALE	Stage I	T1	M0	N0
42	0.562962	1	38	FEMALE	Stage I	T1	M0	N0
35	1.84803	2	38	FEMALE	Stage I	T1	M0	N0
58	2.00341	2	55	MALE	Stage I	T1	M0	N0
24	1.82771	2	43	FEMALE	Stage I	T1a	M0	N0
25	1.80063	2	42	MALE	Stage I	T1a	M0	N0
17	1.60881	2	38	MALE	Stage I	T1a	M0	N0
15	1.43583	2	55	FEMALE	Stage I	T1b	M0	N0
32	1.60715	2	42	FEMALE	Stage I	T1b	M0	N0
57	1.5926	2	41	FEMALE	Stage I	T1b	M0	N0
21	1.39767	2	38	FEMALE	Stage I	T1b	M0	N0
45	1.56849	2	40	MALE	Stage I	T1b	M0	N0
9	1.32425	2	57	FEMALE	Stage I	T2	M0	N0
60	1.35916	2	42	FEMALE	Stage I	T2	M0	N0
12	1.19359	2	41	FEMALE	Stage I	T2	M0	N0
10	1.19759	2	41	FEMALE	Stage I	T2	M0	N0
27	1.17289	2	39	FEMALE	Stage I	T2	M0	N0
38	0.921642	1	38	FEMALE	Stage I	T2	M0	N0
34	1.09194	2	38	FEMALE	Stage I	T2	M0	N0
16	1.14873	2	38	FEMALE	Stage I	T2	M0	N0
31	0.869484	1	37	FEMALE	Stage I	T2	M0	N0
59	0.901716	1	37	FEMALE	Stage I	T2	M0	N0
36	0.91827	1	70	MALE	Stage I	T2	M0	N0
41	1.39452	2	42	MALE	Stage I	T2	M0	N0
50	1.16901	2	39	MALE	Stage I	T2	M0	N0
4	1.14746	2	38	MALE	Stage I	T2	M0	N0
29	1.18143	2	41	FEMALE	Stage I	T2	M0	N1
26	1.2004	2	41	FEMALE	Stage I	T2	M0	N1
11	1.26771	2	41	FEMALE	Stage I	T2	M0	N1
14	0.863393	1	37	FEMALE	Stage I	T2	M0	N1
53	0.761641	1	42	FEMALE	Stage I	T3	M0	N1
39	0.700895	1	41	FEMALE	Stage I	T3	M0	N1
13	1.64793	2	37	FEMALE	Stage I	T3	M0	N1
19	0.573477	1	41	MALE	Stage I	T3	M0	N1
3	0.705804	1	41	MALE	Stage I	T3	M0	N1
37	1.68624	2	39	FEMALE	Stage I	T1a	M0	N1a
48	0.410171	1	39	FEMALE	Stage I	T1b	M0	N1a
7	1.11904	2	38	FEMALE	Stage I	T2	M0	N1a
49	0.514075	1	40	FEMALE	Stage I	T3	M0	N1a
54	0.118451	1	37	MALE	Stage I	T3	M0	N1a
52	0.066174	1	39	FEMALE	Stage I	T1a	M0	N1b
22	1.39968	2	38	FEMALE	Stage I	T1b	M0	N1b
8	0.479026	1	40	MALE	Stage I	T3	M0	N1b
47	0.39086	1	39	MALE	Stage I	T3	M0	N1b
6	1.54769	2	39	MALE	Stage I	T3	M0	N1b
55	0.653509	1	65	FEMALE	Stage II	T3	M0	N0
2	1.9569	2	57	FEMALE	Stage II	T3	M0	N0
40	0.412937	1	55	FEMALE	Stage II	T3	M0	N0
46	0.709349	1	63	MALE	Stage II	T3	M0	N0
28	2.0106	2	40	FEMALE	Stage II	T1	M1	N1
1	0.996495	1	59	FEMALE	Stage II	T2	M0	N1
18	0.755601	1	72	FEMALE	Stage II	T3	M0	N1
56	0.149177	1	68	FEMALE	Stage II	T3	M0	N1
20	0.802811	1	70	MALE	Stage II	T3	M0	N1a
5	0.3167	1	79	FEMALE	Stage II	T3	M0	N1b
30	0.327628	1	60	MALE	Stage II	T3	M0	N1b
33	0.258786	1	55	MALE	Stage II	T3	M0	N1b
43	0.0271399	1	57	FEMALE	Stage IVA	T4b	M0	N1
