# Supplementary material for: miR-30b-5p inhibits proliferation, invasion, and migration of papillary thyroid cancer by targeting GALNT7 via the EGFR/PI3K/AKT pathway
Source: Cancer Cell Int. 2021 Nov 24;21:618. doi: 10.1186/s12935-021-02323-x (PMC8611849; doi:10.1186/s12935-021-02323-x)
Supplement: Supplementary file 3 — Additional file 3. The raw data of CCK8 assay. [file 12935_2021_2323_MOESM3_ESM.xlsx]

## Sheet: CCK8
K1
mir-30b-5p mimic	0.266	0.26	0.271	0.316	0.343		NC mimic	0.266	0.273	0.302	0.291	0.271
	0.515	0.558	0.409	0.35	0.481			0.481	0.432	0.578	0.494	0.595
	0.788	0.637	0.811	0.837	0.732			1.157	0.945	0.915	0.871	0.956
	0.941	0.926	1.03	1.075	1.041			1.372	1.405	1.336	1.418	1.225
B-CPAP
NC mimic	0.41	0.451	0.421	0.446	0.447		mir-30b-5p mimic	0.452	0.535	0.451	0.493	0.511
	0.767	1.003	0.814	1.01	0.734			0.708	0.657	0.663	0.782	0.717
	1.538	1.358	1.525	1.595	1.496			1.017	0.986	0.982	0.825	0.958
	2.156	1.717	1.835	1.914	1.955			1.133	1.038	1.345	1.29	1.342
