# Supplementary material for: miR-30b-5p inhibits proliferation, invasion, and migration of papillary thyroid cancer by targeting GALNT7 via the EGFR/PI3K/AKT pathway
Source: Cancer Cell Int. 2021 Nov 24;21:618. doi: 10.1186/s12935-021-02323-x (PMC8611849; doi:10.1186/s12935-021-02323-x)
Supplement: Supplementary file 4 — Additional file 4. The quantitative data of EdU assay. [file 12935_2021_2323_MOESM4_ESM.xlsx]

## Sheet: Fig.2
		K1			B-CPAP
		NC mimic	mir-30b-5p mimic		NC mimic	mir-30b-5p mimic
		0.965523	0.613791		0.820859	0.643508
		0.800975	0.722619		0.890823	0.65083
		1.18318	0.504963		1.02831	0.724048
		1.09699	0.722619		1.1056	0.688253
		0.953334	0.731325		1.15441	0.410023

## Sheet: Fig.5
			K1								B-CPAP
			NC mimic	mir-30b-5p mimic	mir-30b-5p mimic+vector	mir-30b-5p mimic+GALNT7					NC mimic	mir-30b-5p mimic	mir-30b-5p mimic+vector	mir-30b-5p mimic+GALNT7
			0.989267	0.735242	0.743292	1.08676					0.81668	0.642801	0.651456	0.973249
			0.825581	0.583184	0.55814	1.27191					1.11959	0.623131	0.66247	0.937844
			1.18515	0.636852	0.73703	1.1297					1.06373	0.575138	0.498033	1.02124

## Sheet: Fig.6D
			si-NC	si-GALNT7-2							si-NC	si-GALNT7-2
			0.893443	0.663934							0.858209	0.529851
			1.08197	0.606557							1.13433	0.477612
			1.02459	0.565574							1.00746	0.514925

## Sheet: Fig.8
			vector	GALNT7	BMS-599626+GALNT7			vector	GALNT7	BMS-599626+GALNT7
		K1	0.1141	0.146	0.06		B-CPAP	0.114	0.139	0.062
			0.1233	0.156	0.07			0.094	0.146	0.073
			0.0932	0.152	0.064			0.123	0.152	0.06
			0.1102
								0.110333
			1.03539	1.32486	0.544465
			1.11887	1.41561	0.635209			1.03323	1.25982	0.561934
			0.845735	1.37931	0.580762			0.851964	1.32326	0.661631
								1.1148	1.37764	0.543807
