# Supplementary material for: miR-30b-5p inhibits proliferation, invasion, and migration of papillary thyroid cancer by targeting GALNT7 via the EGFR/PI3K/AKT pathway
Source: Cancer Cell Int. 2021 Nov 24;21:618. doi: 10.1186/s12935-021-02323-x (PMC8611849; doi:10.1186/s12935-021-02323-x)
Supplement: Supplementary file 5 — Additional file 5. The quantitative data of Transwell assay. [file 12935_2021_2323_MOESM5_ESM.xlsx]

## Sheet: K1
Fig.3C-E
NC mimic	mir-30b-5p-mimic		migration
240	150		0.97561	0.609756
256	155		1.04065	0.630081
248	164		1.00813	0.666667
240	160		0.97561	0.650407
244	156		0.99187	0.634146
			invison
231	135		0.932392	0.544904
240	135		0.968718	0.544904
259	143		1.04541	0.577195
261	150		1.05348	0.605449
262	156		1.05752	0.629667
Fig.5H, I
NM	30M	30M+vector	30M+GALNT7		migration	245.667
246	156	164	300			1.00136	0.635007	0.667571	1.22117
232	136	159	347			0.944369	0.553596	0.647218	1.41248
259	163	183	319			1.05427	0.663501	0.744912	1.29851
					invison	240.667
247	143	155	330			1.02632	0.594183	0.644044	1.37119
222	133	150	285			0.922438	0.552632	0.623269	1.18421
253	162	136	290			1.05125	0.67313	0.565097	1.20499
Fig.6E-G
NC	siRNA		258
265	134		1.02713	0.51938	migration
273	152		1.05814	0.589147
236	168		0.914729	0.651163
NC	siRNA		254.667
236	126		0.914729	0.488372	invison
255	142		0.988372	0.550388
273	138		1.05814	0.534884
Fig.8
NC	GALNT7	GALNT7+BMS	258
265	407	273	1.02713	1.57752	1.05814	migration
273	432	284	1.05814	1.67442	1.10078
236	429	298	0.914729	1.66279	1.15504
NC	siRNA		257.667
245	408	276	0.950841	1.58344	1.07115	invison
255	425	302	0.989651	1.64942	1.17206
273	416	286	1.05951	1.61449	1.10996

## Sheet: B-cpap
Fig.3C-E
NC mimic	mir-30b-5p-mimic		migration
240	150		0.977199	0.610749
256	155		1.04235	0.631107
248	164		1.00977	0.667752
240	160		0.977199	0.651466
244	156		0.993485	0.635179
			invison
231	135		0.921788	0.538707
240	135		0.957702	0.538707
259	143		1.03352	0.57063
261	150		1.0415	0.598563
262	156		1.04549	0.622506
Fig.5H, I
NM	30M	30M+vector	30M+mimic		migration	261.333
238	134	150	333			0.910714	0.512755	0.57398	1.27423
269	164	124	362			1.02934	0.627551	0.47449	1.3852
277	150	166	321			1.05995	0.57398	0.635204	1.22832
					invison	251.333
223	146	137	326			0.887268	0.580902	0.545093	1.29708
257	140	169	319			1.02255	0.557029	0.672414	1.26923
274	157	152	352			1.09019	0.624668	0.604775	1.40053
Fig.6E-G
NC	siRNA		249.333
239	150		0.958556	0.601604	migration
248	136		0.994652	0.545455
261	155		1.04679	0.621658
NC	siRNA		234.333
220	134		0.882353	0.537433	invison
231	167		0.926471	0.669786
252	153		1.0107	0.613636
Fig.8
NC	GALNT7	GALNT7+BMS	240.333
239	406	278	0.994452	1.68932	1.15673	migration
229	398	298	0.952843	1.65603	1.23994
253	402	302	1.0527	1.67268	1.25659
NC	siRNA		234.333
220	371	271	0.938834	1.58321	1.15647	invison
231	407	283	0.985775	1.73684	1.20768
252	397	297	1.07539	1.69417	1.26743
