# Supplementary material for: miR-30b-5p inhibits proliferation, invasion, and migration of papillary thyroid cancer by targeting GALNT7 via the EGFR/PI3K/AKT pathway
Source: Cancer Cell Int. 2021 Nov 24;21:618. doi: 10.1186/s12935-021-02323-x (PMC8611849; doi:10.1186/s12935-021-02323-x)
Supplement: Supplementary file 7 — Additional file 7. The raw data of Dual-Luciferase Reporter Assay. [file 12935_2021_2323_MOESM7_ESM.xlsx]

## Sheet: 1
原始荧光值	Luc	h-GALNT7-WT+NC	h-GALNT7-WT+hsa-miR-30b-5p	h-GALNT7-MUT+NC	h-GALNT7-MUT+hsa-miR-30b-5p
	1	2010364	2139875	1631308	1396938
	2	1802676	2084597	1457331	1580061
	3	1673822	2596975	1316913	2281901
	Rlu	h-GALNT7-WT+NC	h-GALNT7-WT+hsa-miR-30b-5p	h-GALNT7-MUT+NC	h-GALNT7-MUT+hsa-miR-30b-5p
	1	1536451	1146757	1221896	1098668
	2	1305275	1134214	1041240	1245960
	3	1248758	1485839	955969	1760318
荧光校正	Rlu/Luc	h-GALNT7-WT+NC	h-GALNT7-WT+hsa-miR-30b-5p	h-GALNT7-MUT+NC	h-GALNT7-MUT+hsa-miR-30b-5p
	1	0.764265	0.535899	0.749028	0.786483
	2	0.724076	0.544093	0.714484	0.788552
	3	0.746052	0.572142	0.725917	0.771426
	Ave	0.744798		0.72981
相对荧光值		h-GALNT7-WT+NC	h-GALNT7-WT+hsa-miR-30b-5p	h-GALNT7-MUT+NC	h-GALNT7-MUT+hsa-miR-30b-5p
	1	1.02614	0.719523	1.02633	1.07765
	2	0.972178	0.730524	0.979001	1.08049
	3	1.00168	0.768185	0.994666	1.05702
	Ave	1	0.739411	1	1.07172			1.02614	0.972178	1.00168
	SD	0.027019	0.025519	0.0241132	0.0128085			0.719523	0.730524	0.768185
								1.02633	0.979001	0.994666
作图		h-GALNT7-WT+NC	h-GALNT7-WT+hsa-miR-30b-5p	h-GALNT7-MUT+NC	h-GALNT7-MUT+hsa-miR-30b-5p			1.07765	1.08049	1.05702
	Ave	1	0.739411	1	1.07172
	SD	0.027019	0.025519	0.0241132	0.0128085			1.02614	0.719523	1.02633	1.07765
								0.972178	0.730524	0.979001	1.08049
								1.00168	0.768185	0.994666	1.05702

## Sheet: 2
	NC	hsa-miR-30b-5p
h-GALNT7-WT	1	0.739411
h-GALNT7-MUT	1	1.07172
SD	0.027019	0.025519
SD	0.0241132	0.0128085
