# Supplementary material for: miR-30b-5p inhibits proliferation, invasion, and migration of papillary thyroid cancer by targeting GALNT7 via the EGFR/PI3K/AKT pathway
Source: Cancer Cell Int. 2021 Nov 24;21:618. doi: 10.1186/s12935-021-02323-x (PMC8611849; doi:10.1186/s12935-021-02323-x)
Supplement: Supplementary file 8 — Additional file 8. The tumor volume data in xenograft tumor model. [file 12935_2021_2323_MOESM8_ESM.xlsx]

## Sheet: Sheet1
	mir-30b-5p agomir								NC agomir
V(mm3)	150.21	160.4	150.4	120.16	160.21				152.04	147.3	129.1	162.14	172.8
	182.3	205.1	181.01	120.31	204.52				250.3	350.2	280.1	302.4	260.2
	226.1	257.2	204.01	163.51	269.021				394.2	579.2	452.12	431.42	378.61
	270.3	340.03	240.3	220.21	370.7				540.62	860.155	640.624	615.003	502.154
	301.1	389.09	287.24	253.12	420.24				703.241	1022.51	832.125	742.241	732.601
	352.8	460.8	299.022	328.05	500.12				783.627	1351.37	985.608	783.627	726.133
