# Supplementary material for: miR-30b-5p inhibits proliferation, invasion, and migration of papillary thyroid cancer by targeting GALNT7 via the EGFR/PI3K/AKT pathway
Source: Cancer Cell Int. 2021 Nov 24;21:618. doi: 10.1186/s12935-021-02323-x (PMC8611849; doi:10.1186/s12935-021-02323-x)
Supplement: Supplementary file 9 — Additional file 9. The GSEA analysis on the signaling pathways. [file 12935_2021_2323_MOESM9_ESM.xlsx]

## Sheet: CC
NAME	GS<br> follow link to MSigDB	GS DETAILS	SIZE	ES	NES	NOM p-val	FDR q-val	FWER p-val	RANK AT MAX	LEADING EDGE
GO_AXON_EXTENSION	GO_AXON_EXTENSION	Details ...	123	0.651363	2.19313	0	0.00472471	0.004	5637	tags=52%, list=10%, signal=58%
GO_NEURON_PROJECTION_EXTENSION	GO_NEURON_PROJECTION_EXTENSION	Details ...	172	0.587005	2.05378	0	0.150244	0.108	5685	tags=45%, list=10%, signal=50%
GO_EPIDERMAL_GROWTH_FACTOR_RECEPTOR_SIGNALING_PATHWAY	GO_EPIDERMAL_GROWTH_FACTOR_RECEPTOR_SIGNALING_PATHWAY	Details ...	120	0.596011	2.05359	0	0.100163	0.108	4475	tags=42%, list=8%, signal=45%
GO_DENDRITIC_SPINE_MAINTENANCE	GO_DENDRITIC_SPINE_MAINTENANCE	Details ...	20	0.7372	2.05248	0	0.0763211	0.109	5887	tags=55%, list=11%, signal=62%
GO_PROTEIN_TARGETING_TO_LYSOSOME	GO_PROTEIN_TARGETING_TO_LYSOSOME	Details ...	22	0.784134	2.04156	0.00202429	0.0787107	0.126	6658	tags=73%, list=12%, signal=83%
GO_BARBED_END_ACTIN_FILAMENT_CAPPING	GO_BARBED_END_ACTIN_FILAMENT_CAPPING	Details ...	25	0.696017	2.03529	0	0.0758444	0.135	3369	tags=40%, list=6%, signal=43%
GO_LAMELLIPODIUM_MORPHOGENESIS	GO_LAMELLIPODIUM_MORPHOGENESIS	Details ...	17	0.772096	2.02546	0	0.0775083	0.15	1229	tags=47%, list=2%, signal=48%
GO_NEGATIVE_REGULATION_OF_GENE_EXPRESSION_EPIGENETIC	GO_NEGATIVE_REGULATION_OF_GENE_EXPRESSION_EPIGENETIC	Details ...	60	0.682324	2.02517	0	0.0681815	0.151	6180	tags=53%, list=11%, signal=60%
GO_REGULATION_OF_EXTENT_OF_CELL_GROWTH	GO_REGULATION_OF_EXTENT_OF_CELL_GROWTH	Details ...	111	0.576054	2.02492	0	0.0607766	0.152	5637	tags=43%, list=10%, signal=48%
GO_POSITIVE_REGULATION_OF_G1_S_TRANSITION_OF_MITOTIC_CELL_CYCLE	GO_POSITIVE_REGULATION_OF_G1_S_TRANSITION_OF_MITOTIC_CELL_CYCLE	Details ...	47	0.612068	2.01714	0	0.0629694	0.162	5026	tags=36%, list=9%, signal=40%
GO_CHROMATIN_SILENCING	GO_CHROMATIN_SILENCING	Details ...	41	0.681124	2.00562	0	0.0683443	0.179	5617	tags=51%, list=10%, signal=57%
GO_ENTRY_OF_BACTERIUM_INTO_HOST_CELL	GO_ENTRY_OF_BACTERIUM_INTO_HOST_CELL	Details ...	15	0.850371	2.00414	0	0.0651376	0.181	1061	tags=40%, list=2%, signal=41%
GO_ERBB_SIGNALING_PATHWAY	GO_ERBB_SIGNALING_PATHWAY	Details ...	142	0.556445	1.99322	0	0.0714734	0.207	4475	tags=39%, list=8%, signal=43%
GO_NEGATIVE_REGULATION_OF_RHO_PROTEIN_SIGNAL_TRANSDUCTION	GO_NEGATIVE_REGULATION_OF_RHO_PROTEIN_SIGNAL_TRANSDUCTION	Details ...	22	0.769084	1.9899	0	0.0703511	0.211	5062	tags=64%, list=9%, signal=70%
GO_REGULATION_OF_GENE_EXPRESSION_EPIGENETIC	GO_REGULATION_OF_GENE_EXPRESSION_EPIGENETIC	Details ...	143	0.598342	1.98708	0	0.0687674	0.216	6194	tags=48%, list=11%, signal=54%
GO_POSITIVE_REGULATION_OF_PROTEIN_LOCALIZATION_TO_CELL_PERIPHERY	GO_POSITIVE_REGULATION_OF_PROTEIN_LOCALIZATION_TO_CELL_PERIPHERY	Details ...	67	0.554993	1.98687	0	0.0645641	0.216	4181	tags=34%, list=8%, signal=37%
GO_AMYLOID_BETA_METABOLIC_PROCESS	GO_AMYLOID_BETA_METABOLIC_PROCESS	Details ...	51	0.592584	1.975	0	0.0737703	0.246	5332	tags=49%, list=10%, signal=54%
GO_DEVELOPMENTAL_GROWTH_INVOLVED_IN_MORPHOGENESIS	GO_DEVELOPMENTAL_GROWTH_INVOLVED_IN_MORPHOGENESIS	Details ...	235	0.548158	1.97345	0	0.0722569	0.25	5781	tags=41%, list=10%, signal=45%
GO_CHROMATIN_ORGANIZATION_INVOLVED_IN_REGULATION_OF_TRANSCRIPTION	GO_CHROMATIN_ORGANIZATION_INVOLVED_IN_REGULATION_OF_TRANSCRIPTION	Details ...	89	0.632923	1.97339	0	0.0685571	0.25	5617	tags=49%, list=10%, signal=55%
GO_MAMMARY_GLAND_EPITHELIAL_CELL_PROLIFERATION	GO_MAMMARY_GLAND_EPITHELIAL_CELL_PROLIFERATION	Details ...	28	0.668022	1.97223	0	0.0661086	0.253	4975	tags=46%, list=9%, signal=51%
GO_NEGATIVE_REGULATION_OF_RECEPTOR_SIGNALING_PATHWAY_VIA_STAT	GO_NEGATIVE_REGULATION_OF_RECEPTOR_SIGNALING_PATHWAY_VIA_STAT	Details ...	30	0.629413	1.96692	0	0.0682364	0.263	3733	tags=30%, list=7%, signal=32%
GO_POSITIVE_REGULATION_OF_PROTEIN_TYROSINE_KINASE_ACTIVITY	GO_POSITIVE_REGULATION_OF_PROTEIN_TYROSINE_KINASE_ACTIVITY	Details ...	60	0.5899	1.96494	0	0.0668531	0.265	3575	tags=37%, list=6%, signal=39%
GO_LYSOSOMAL_TRANSPORT	GO_LYSOSOMAL_TRANSPORT	Details ...	110	0.597363	1.96384	0	0.0654775	0.271	4881	tags=45%, list=9%, signal=50%
GO_NEGATIVE_REGULATION_OF_CELL_MORPHOGENESIS_INVOLVED_IN_DIFFERENTIATION	GO_NEGATIVE_REGULATION_OF_CELL_MORPHOGENESIS_INVOLVED_IN_DIFFERENTIATION	Details ...	98	0.559642	1.96058	0	0.0658737	0.278	5420	tags=42%, list=10%, signal=46%
GO_REGULATION_OF_PROTEIN_TYROSINE_KINASE_ACTIVITY	GO_REGULATION_OF_PROTEIN_TYROSINE_KINASE_ACTIVITY	Details ...	92	0.557409	1.95479	0	0.0687063	0.29	5475	tags=41%, list=10%, signal=46%
GO_REGULATION_OF_AXONOGENESIS	GO_REGULATION_OF_AXONOGENESIS	Details ...	186	0.542457	1.95256	0	0.068239	0.297	5637	tags=40%, list=10%, signal=44%
GO_SPHINGOLIPID_BIOSYNTHETIC_PROCESS	GO_SPHINGOLIPID_BIOSYNTHETIC_PROCESS	Details ...	104	0.537382	1.94947	0.00213675	0.0681764	0.301	6339	tags=45%, list=11%, signal=51%
GO_LENS_FIBER_CELL_DIFFERENTIATION	GO_LENS_FIBER_CELL_DIFFERENTIATION	Details ...	35	0.614527	1.94662	0	0.0686857	0.31	5250	tags=49%, list=9%, signal=54%
GO_POSITIVE_REGULATION_OF_GENE_EXPRESSION_EPIGENETIC	GO_POSITIVE_REGULATION_OF_GENE_EXPRESSION_EPIGENETIC	Details ...	48	0.629778	1.94494	0	0.0684613	0.316	6194	tags=54%, list=11%, signal=61%
GO_NEGATIVE_REGULATION_OF_SMALL_GTPASE_MEDIATED_SIGNAL_TRANSDUCTION	GO_NEGATIVE_REGULATION_OF_SMALL_GTPASE_MEDIATED_SIGNAL_TRANSDUCTION	Details ...	58	0.63166	1.94415	0	0.0668779	0.317	5929	tags=55%, list=11%, signal=62%
GO_RESPONSE_TO_X_RAY	GO_RESPONSE_TO_X_RAY	Details ...	31	0.692545	1.93919	0.00213675	0.0698776	0.322	3909	tags=48%, list=7%, signal=52%
GO_DEVELOPMENTAL_CELL_GROWTH	GO_DEVELOPMENTAL_CELL_GROWTH	Details ...	231	0.527969	1.93773	0	0.0693915	0.328	5685	tags=39%, list=10%, signal=43%
GO_POSITIVE_REGULATION_OF_FILOPODIUM_ASSEMBLY	GO_POSITIVE_REGULATION_OF_FILOPODIUM_ASSEMBLY	Details ...	30	0.638956	1.93164	0.00204499	0.0732822	0.343	3619	tags=47%, list=7%, signal=50%
GO_REGULATION_OF_TYPE_I_INTERFERON_MEDIATED_SIGNALING_PATHWAY	GO_REGULATION_OF_TYPE_I_INTERFERON_MEDIATED_SIGNALING_PATHWAY	Details ...	34	0.701866	1.92734	0	0.0753896	0.351	3516	tags=50%, list=6%, signal=53%
GO_NEGATIVE_REGULATION_OF_EXTRINSIC_APOPTOTIC_SIGNALING_PATHWAY	GO_NEGATIVE_REGULATION_OF_EXTRINSIC_APOPTOTIC_SIGNALING_PATHWAY	Details ...	106	0.546645	1.92516	0.00205339	0.0760603	0.359	5312	tags=34%, list=10%, signal=38%
GO_RESPONSE_TO_STEROL_DEPLETION	GO_RESPONSE_TO_STEROL_DEPLETION	Details ...	17	0.748921	1.92475	0.00206612	0.0742646	0.36	8032	tags=71%, list=15%, signal=83%
GO_REGULATION_OF_FILOPODIUM_ASSEMBLY	GO_REGULATION_OF_FILOPODIUM_ASSEMBLY	Details ...	45	0.593791	1.92418	0.00205339	0.0728974	0.362	3619	tags=47%, list=7%, signal=50%
GO_VESICLE_MEDIATED_TRANSPORT_BETWEEN_ENDOSOMAL_COMPARTMENTS	GO_VESICLE_MEDIATED_TRANSPORT_BETWEEN_ENDOSOMAL_COMPARTMENTS	Details ...	41	0.644877	1.9217	0.00207039	0.0733867	0.365	4176	tags=51%, list=8%, signal=55%
GO_NEGATIVE_CHEMOTAXIS	GO_NEGATIVE_CHEMOTAXIS	Details ...	47	0.615714	1.91928	0.00403226	0.0742977	0.37	6178	tags=51%, list=11%, signal=57%
GO_POSTSYNAPSE_ORGANIZATION	GO_POSTSYNAPSE_ORGANIZATION	Details ...	173	0.516896	1.91645	0	0.0748764	0.377	6056	tags=39%, list=11%, signal=43%
GO_REGULATION_OF_CELL_MORPHOGENESIS	GO_REGULATION_OF_CELL_MORPHOGENESIS	Details ...	496	0.503436	1.91615	0	0.0733228	0.379	6056	tags=39%, list=11%, signal=43%
GO_UTERUS_DEVELOPMENT	GO_UTERUS_DEVELOPMENT	Details ...	21	0.797773	1.91148	0.00204918	0.0757293	0.389	6086	tags=52%, list=11%, signal=59%
GO_REGULATION_OF_CELL_MORPHOGENESIS_INVOLVED_IN_DIFFERENTIATION	GO_REGULATION_OF_CELL_MORPHOGENESIS_INVOLVED_IN_DIFFERENTIATION	Details ...	310	0.506524	1.90987	0	0.0756073	0.392	5729	tags=38%, list=10%, signal=42%
GO_REGULATION_OF_ESTABLISHMENT_OR_MAINTENANCE_OF_CELL_POLARITY	GO_REGULATION_OF_ESTABLISHMENT_OR_MAINTENANCE_OF_CELL_POLARITY	Details ...	24	0.724687	1.90863	0.00206612	0.0751821	0.395	3642	tags=50%, list=7%, signal=54%
GO_REGULATION_OF_CELL_SIZE	GO_REGULATION_OF_CELL_SIZE	Details ...	180	0.514943	1.9071	0	0.0748262	0.397	5637	tags=38%, list=10%, signal=43%
GO_MODIFICATION_OF_SYNAPTIC_STRUCTURE	GO_MODIFICATION_OF_SYNAPTIC_STRUCTURE	Details ...	24	0.667008	1.9041	0.00592885	0.0760016	0.405	6454	tags=71%, list=12%, signal=80%
GO_MEMBRANE_FISSION	GO_MEMBRANE_FISSION	Details ...	15	0.720186	1.8998	0	0.0782406	0.413	2263	tags=40%, list=4%, signal=42%
GO_AMYLOID_BETA_FORMATION	GO_AMYLOID_BETA_FORMATION	Details ...	39	0.605213	1.89883	0	0.0776932	0.418	5332	tags=54%, list=10%, signal=60%
GO_POSITIVE_REGULATION_OF_AMYLOID_PRECURSOR_PROTEIN_CATABOLIC_PROCESS	GO_POSITIVE_REGULATION_OF_AMYLOID_PRECURSOR_PROTEIN_CATABOLIC_PROCESS	Details ...	24	0.661421	1.898	0	0.0769241	0.419	4758	tags=46%, list=9%, signal=50%
GO_RAC_PROTEIN_SIGNAL_TRANSDUCTION	GO_RAC_PROTEIN_SIGNAL_TRANSDUCTION	Details ...	38	0.645503	1.89452	0.00631579	0.079212	0.427	5258	tags=61%, list=10%, signal=67%
GO_CELLULAR_RESPONSE_TO_STEROL_DEPLETION	GO_CELLULAR_RESPONSE_TO_STEROL_DEPLETION	Details ...	15	0.74701	1.89247	0.00414079	0.07979	0.433	8032	tags=73%, list=15%, signal=86%
GO_MODIFICATION_OF_POSTSYNAPTIC_STRUCTURE	GO_MODIFICATION_OF_POSTSYNAPTIC_STRUCTURE	Details ...	18	0.706855	1.89228	0.00398406	0.0783383	0.433	4383	tags=67%, list=8%, signal=72%
GO_AMYLOID_PRECURSOR_PROTEIN_CATABOLIC_PROCESS	GO_AMYLOID_PRECURSOR_PROTEIN_CATABOLIC_PROCESS	Details ...	50	0.555414	1.89137	0.00204918	0.0777818	0.433	5332	tags=48%, list=10%, signal=53%
GO_APICAL_JUNCTION_ASSEMBLY	GO_APICAL_JUNCTION_ASSEMBLY	Details ...	85	0.540866	1.88798	0	0.0798846	0.445	5083	tags=40%, list=9%, signal=44%
GO_POSITIVE_REGULATION_OF_CELL_AGING	GO_POSITIVE_REGULATION_OF_CELL_AGING	Details ...	17	0.699607	1.8869	0.00206186	0.0792632	0.448	7255	tags=47%, list=13%, signal=54%
GO_CELLULAR_RESPONSE_TO_IONIZING_RADIATION	GO_CELLULAR_RESPONSE_TO_IONIZING_RADIATION	Details ...	67	0.579295	1.88689	0.00213675	0.0778654	0.448	3993	tags=42%, list=7%, signal=45%
GO_NEGATIVE_REGULATION_OF_RECEPTOR_SIGNALING_PATHWAY_VIA_JAK_STAT	GO_NEGATIVE_REGULATION_OF_RECEPTOR_SIGNALING_PATHWAY_VIA_JAK_STAT	Details ...	24	0.643425	1.8843	0.00201207	0.0788951	0.454	3733	tags=33%, list=7%, signal=36%
GO_REGULATION_OF_ERBB_SIGNALING_PATHWAY	GO_REGULATION_OF_ERBB_SIGNALING_PATHWAY	Details ...	94	0.535443	1.88153	0	0.0798564	0.459	4475	tags=38%, list=8%, signal=42%
GO_ACTIVATION_OF_MAPKK_ACTIVITY	GO_ACTIVATION_OF_MAPKK_ACTIVITY	Details ...	52	0.60439	1.88134	0.00402414	0.0786045	0.459	6859	tags=56%, list=12%, signal=64%
GO_RESPONSE_TO_DSRNA	GO_RESPONSE_TO_DSRNA	Details ...	52	0.56132	1.88121	0.0020284	0.0773482	0.459	5424	tags=35%, list=10%, signal=38%
GO_EPHRIN_RECEPTOR_SIGNALING_PATHWAY	GO_EPHRIN_RECEPTOR_SIGNALING_PATHWAY	Details ...	87	0.524496	1.87845	0.00603622	0.0786705	0.465	6680	tags=41%, list=12%, signal=47%
GO_DENDRITE_MORPHOGENESIS	GO_DENDRITE_MORPHOGENESIS	Details ...	145	0.553603	1.87804	0	0.0780451	0.467	4682	tags=39%, list=8%, signal=42%
GO_ERBB2_SIGNALING_PATHWAY	GO_ERBB2_SIGNALING_PATHWAY	Details ...	32	0.618347	1.87167	0	0.0826168	0.479	4475	tags=47%, list=8%, signal=51%
GO_PROTEIN_LOCALIZATION_TO_LYSOSOME	GO_PROTEIN_LOCALIZATION_TO_LYSOSOME	Details ...	42	0.588695	1.87107	0	0.0820095	0.481	3963	tags=38%, list=7%, signal=41%
GO_NEGATIVE_REGULATION_OF_TYROSINE_PHOSPHORYLATION_OF_STAT_PROTEIN	GO_NEGATIVE_REGULATION_OF_TYROSINE_PHOSPHORYLATION_OF_STAT_PROTEIN	Details ...	15	0.709004	1.86907	0.00399202	0.0827669	0.484	3155	tags=33%, list=6%, signal=35%
GO_INTERLEUKIN_6_MEDIATED_SIGNALING_PATHWAY	GO_INTERLEUKIN_6_MEDIATED_SIGNALING_PATHWAY	Details ...	33	0.694628	1.86801	0.00628931	0.082665	0.487	3155	tags=36%, list=6%, signal=39%
GO_PEPTIDYL_THREONINE_MODIFICATION	GO_PEPTIDYL_THREONINE_MODIFICATION	Details ...	124	0.551245	1.86738	0.00209644	0.0820071	0.491	6949	tags=49%, list=13%, signal=56%
GO_CERAMIDE_BIOSYNTHETIC_PROCESS	GO_CERAMIDE_BIOSYNTHETIC_PROCESS	Details ...	65	0.538657	1.86642	0.00421053	0.0819119	0.494	6812	tags=45%, list=12%, signal=51%
GO_ADHERENS_JUNCTION_ORGANIZATION	GO_ADHERENS_JUNCTION_ORGANIZATION	Details ...	67	0.570242	1.86595	0.00198807	0.0812918	0.495	5999	tags=39%, list=11%, signal=43%
GO_NEURAL_TUBE_FORMATION	GO_NEURAL_TUBE_FORMATION	Details ...	106	0.561877	1.86519	0.0102459	0.0809696	0.5	6134	tags=47%, list=11%, signal=53%
GO_REGULATION_OF_NEURON_PROJECTION_REGENERATION	GO_REGULATION_OF_NEURON_PROJECTION_REGENERATION	Details ...	32	0.615383	1.86506	0.00399202	0.0799104	0.5	5192	tags=38%, list=9%, signal=41%
GO_REGULATION_OF_EXTRINSIC_APOPTOTIC_SIGNALING_PATHWAY_VIA_DEATH_DOMAIN_RECEPTORS	GO_REGULATION_OF_EXTRINSIC_APOPTOTIC_SIGNALING_PATHWAY_VIA_DEATH_DOMAIN_RECEPTORS	Details ...	61	0.582622	1.86472	0.00205761	0.0792042	0.502	8572	tags=48%, list=16%, signal=56%
GO_VACUOLAR_TRANSPORT	GO_VACUOLAR_TRANSPORT	Details ...	150	0.536459	1.86448	0.00410678	0.0785289	0.502	5258	tags=43%, list=10%, signal=48%
GO_POSITIVE_REGULATION_OF_AUTOPHAGY	GO_POSITIVE_REGULATION_OF_AUTOPHAGY	Details ...	129	0.560063	1.86427	0.00207039	0.0777089	0.502	5480	tags=45%, list=10%, signal=50%
GO_NEGATIVE_REGULATION_OF_ERBB_SIGNALING_PATHWAY	GO_NEGATIVE_REGULATION_OF_ERBB_SIGNALING_PATHWAY	Details ...	52	0.574499	1.86378	0.0020202	0.0771002	0.502	4475	tags=48%, list=8%, signal=52%
GO_REGULATION_OF_POSTSYNAPSE_ORGANIZATION	GO_REGULATION_OF_POSTSYNAPSE_ORGANIZATION	Details ...	107	0.526067	1.86372	0.00200803	0.0761248	0.502	5332	tags=36%, list=10%, signal=40%
GO_REGULATION_OF_EPIDERMAL_GROWTH_FACTOR_ACTIVATED_RECEPTOR_ACTIVITY	GO_REGULATION_OF_EPIDERMAL_GROWTH_FACTOR_ACTIVATED_RECEPTOR_ACTIVITY	Details ...	30	0.62678	1.86114	0.00204499	0.0776079	0.513	4475	tags=43%, list=8%, signal=47%
GO_NEURON_PROJECTION_ORGANIZATION	GO_NEURON_PROJECTION_ORGANIZATION	Details ...	92	0.552808	1.86011	0	0.0773419	0.515	6056	tags=42%, list=11%, signal=48%
GO_CELL_AGING	GO_CELL_AGING	Details ...	108	0.507055	1.85762	0.00207039	0.0785941	0.523	5886	tags=38%, list=11%, signal=42%
GO_MITOTIC_G2_DNA_DAMAGE_CHECKPOINT	GO_MITOTIC_G2_DNA_DAMAGE_CHECKPOINT	Details ...	23	0.695672	1.85736	0.00205339	0.0777692	0.524	6030	tags=52%, list=11%, signal=59%
GO_POSITIVE_REGULATION_OF_POSTTRANSCRIPTIONAL_GENE_SILENCING	GO_POSITIVE_REGULATION_OF_POSTTRANSCRIPTIONAL_GENE_SILENCING	Details ...	25	0.694409	1.85523	0.00197628	0.0789354	0.529	4935	tags=56%, list=9%, signal=61%
GO_VIRAL_RNA_GENOME_REPLICATION	GO_VIRAL_RNA_GENOME_REPLICATION	Details ...	33	0.62245	1.85497	0.00628931	0.0783167	0.529	8764	tags=48%, list=16%, signal=58%
GO_REGULATION_OF_CELLULAR_COMPONENT_SIZE	GO_REGULATION_OF_CELLULAR_COMPONENT_SIZE	Details ...	377	0.466038	1.85206	0	0.0798098	0.536	5729	tags=36%, list=10%, signal=40%
GO_NEGATIVE_REGULATION_OF_ACTIN_FILAMENT_BUNDLE_ASSEMBLY	GO_NEGATIVE_REGULATION_OF_ACTIN_FILAMENT_BUNDLE_ASSEMBLY	Details ...	32	0.602542	1.84991	0.00391389	0.0808442	0.544	2446	tags=41%, list=4%, signal=42%
GO_POSITIVE_REGULATION_OF_NUCLEOCYTOPLASMIC_TRANSPORT	GO_POSITIVE_REGULATION_OF_NUCLEOCYTOPLASMIC_TRANSPORT	Details ...	66	0.562754	1.84851	0.00614754	0.0810591	0.546	7756	tags=52%, list=14%, signal=60%
GO_NEGATIVE_REGULATION_OF_CELL_PROJECTION_ORGANIZATION	GO_NEGATIVE_REGULATION_OF_CELL_PROJECTION_ORGANIZATION	Details ...	184	0.483529	1.84667	0.0020284	0.0820043	0.549	5886	tags=39%, list=11%, signal=43%
GO_CEREBRAL_CORTEX_CELL_MIGRATION	GO_CEREBRAL_CORTEX_CELL_MIGRATION	Details ...	41	0.607491	1.84586	0.0020202	0.081955	0.549	5288	tags=44%, list=10%, signal=49%
GO_REGULATION_OF_HISTONE_METHYLATION	GO_REGULATION_OF_HISTONE_METHYLATION	Details ...	64	0.621373	1.84536	0.00198807	0.0815655	0.551	6474	tags=47%, list=12%, signal=53%
GO_ENDOSOME_TO_LYSOSOME_TRANSPORT	GO_ENDOSOME_TO_LYSOSOME_TRANSPORT	Details ...	53	0.609236	1.84495	0.00417537	0.0809898	0.552	4543	tags=51%, list=8%, signal=55%
GO_HISTONE_H3_K27_METHYLATION	GO_HISTONE_H3_K27_METHYLATION	Details ...	16	0.748575	1.84397	0	0.0810073	0.553	3633	tags=44%, list=7%, signal=47%
GO_NEURON_PROJECTION_EXTENSION_INVOLVED_IN_NEURON_PROJECTION_GUIDANCE	GO_NEURON_PROJECTION_EXTENSION_INVOLVED_IN_NEURON_PROJECTION_GUIDANCE	Details ...	37	0.622657	1.84377	0.00608519	0.0802456	0.553	5637	tags=54%, list=10%, signal=60%
GO_SYMPATHETIC_NERVOUS_SYSTEM_DEVELOPMENT	GO_SYMPATHETIC_NERVOUS_SYSTEM_DEVELOPMENT	Details ...	21	0.652581	1.84351	0.00808081	0.0795305	0.553	5637	tags=33%, list=10%, signal=37%
GO_POSITIVE_REGULATION_OF_AMYLOID_BETA_FORMATION	GO_POSITIVE_REGULATION_OF_AMYLOID_BETA_FORMATION	Details ...	20	0.672831	1.84307	0.00824742	0.0791493	0.553	4758	tags=50%, list=9%, signal=55%
GO_NEGATIVE_REGULATION_OF_AXONOGENESIS	GO_NEGATIVE_REGULATION_OF_AXONOGENESIS	Details ...	70	0.546551	1.84058	0	0.0807747	0.563	5420	tags=40%, list=10%, signal=44%
GO_NEGATIVE_REGULATION_OF_SUPRAMOLECULAR_FIBER_ORGANIZATION	GO_NEGATIVE_REGULATION_OF_SUPRAMOLECULAR_FIBER_ORGANIZATION	Details ...	148	0.492949	1.84044	0	0.0801041	0.564	5443	tags=35%, list=10%, signal=39%
GO_G0_TO_G1_TRANSITION	GO_G0_TO_G1_TRANSITION	Details ...	44	0.631711	1.83973	0	0.080071	0.564	8135	tags=55%, list=15%, signal=64%
GO_POSITIVE_REGULATION_OF_CELL_PROJECTION_ORGANIZATION	GO_POSITIVE_REGULATION_OF_CELL_PROJECTION_ORGANIZATION	Details ...	391	0.478427	1.83884	0	0.0799793	0.567	5908	tags=37%, list=11%, signal=41%
GO_DENDRITIC_SPINE_DEVELOPMENT	GO_DENDRITIC_SPINE_DEVELOPMENT	Details ...	102	0.565415	1.83834	0.002	0.0797443	0.57	6829	tags=47%, list=12%, signal=54%
GO_POSITIVE_REGULATION_OF_MACROAUTOPHAGY	GO_POSITIVE_REGULATION_OF_MACROAUTOPHAGY	Details ...	66	0.605047	1.83525	0.00205761	0.0816234	0.579	5001	tags=47%, list=9%, signal=52%
GO_ACTIN_FILAMENT_BASED_TRANSPORT	GO_ACTIN_FILAMENT_BASED_TRANSPORT	Details ...	21	0.704028	1.8343	0.00204082	0.081739	0.582	6063	tags=62%, list=11%, signal=70%
GO_POSITIVE_REGULATION_OF_CELL_CYCLE_G1_S_PHASE_TRANSITION	GO_POSITIVE_REGULATION_OF_CELL_CYCLE_G1_S_PHASE_TRANSITION		58	0.542514	1.83407	0.00205761	0.0810771	0.582	5026	tags=31%, list=9%, signal=34%
GO_SEMAPHORIN_PLEXIN_SIGNALING_PATHWAY	GO_SEMAPHORIN_PLEXIN_SIGNALING_PATHWAY		40	0.593991	1.8327	0.00583658	0.0814734	0.586	5637	tags=48%, list=10%, signal=53%
GO_POSITIVE_REGULATION_OF_HISTONE_METHYLATION	GO_POSITIVE_REGULATION_OF_HISTONE_METHYLATION		40	0.627347	1.83202	0.0019802	0.0812114	0.588	7529	tags=50%, list=14%, signal=58%
GO_GLUCOSAMINE_CONTAINING_COMPOUND_METABOLIC_PROCESS	GO_GLUCOSAMINE_CONTAINING_COMPOUND_METABOLIC_PROCESS		26	0.565513	1.8294	0.0040568	0.0827242	0.593	5697	tags=38%, list=10%, signal=43%
GO_POSITIVE_REGULATION_OF_NEURON_MIGRATION	GO_POSITIVE_REGULATION_OF_NEURON_MIGRATION		16	0.743948	1.82754	0.00402414	0.0835525	0.597	5685	tags=69%, list=10%, signal=77%
GO_CELL_CYCLE_G1_S_PHASE_TRANSITION	GO_CELL_CYCLE_G1_S_PHASE_TRANSITION		298	0.501618	1.82668	0	0.0834051	0.601	5701	tags=36%, list=10%, signal=39%
GO_NEGATIVE_REGULATION_OF_NEURON_PROJECTION_DEVELOPMENT	GO_NEGATIVE_REGULATION_OF_NEURON_PROJECTION_DEVELOPMENT		152	0.491692	1.82576	0.0020202	0.0834677	0.606	5701	tags=39%, list=10%, signal=43%
GO_RESPONSE_TO_PLATELET_DERIVED_GROWTH_FACTOR	GO_RESPONSE_TO_PLATELET_DERIVED_GROWTH_FACTOR		21	0.675041	1.82504	0.00817996	0.0833274	0.606	6515	tags=48%, list=12%, signal=54%
GO_REGULATION_OF_PROTEIN_POLYMERIZATION	GO_REGULATION_OF_PROTEIN_POLYMERIZATION		226	0.467333	1.82438	0.00200803	0.0830842	0.607	5956	tags=38%, list=11%, signal=42%
GO_NEGATIVE_REGULATION_OF_CYTOSKELETON_ORGANIZATION	GO_NEGATIVE_REGULATION_OF_CYTOSKELETON_ORGANIZATION		156	0.491046	1.82354	0	0.0830571	0.609	5443	tags=35%, list=10%, signal=38%
GO_REGULATION_OF_TELOMERE_MAINTENANCE	GO_REGULATION_OF_TELOMERE_MAINTENANCE		80	0.615912	1.82295	0.00650759	0.0827566	0.612	5764	tags=49%, list=10%, signal=54%
GO_CELLULAR_PROTEIN_CONTAINING_COMPLEX_LOCALIZATION	GO_CELLULAR_PROTEIN_CONTAINING_COMPLEX_LOCALIZATION		25	0.661723	1.82225	0.0083682	0.0825998	0.612	6730	tags=60%, list=12%, signal=68%
GO_REGULATION_OF_ACTIN_FILAMENT_ORGANIZATION	GO_REGULATION_OF_ACTIN_FILAMENT_ORGANIZATION		270	0.47448	1.82125	0.00203252	0.0826542	0.613	5956	tags=38%, list=11%, signal=43%
GO_POSITIVE_REGULATION_OF_PLASMA_MEMBRANE_BOUNDED_CELL_PROJECTION_ASSEMBLY	GO_POSITIVE_REGULATION_OF_PLASMA_MEMBRANE_BOUNDED_CELL_PROJECTION_ASSEMBLY		102	0.503006	1.8199	0	0.0829804	0.617	5729	tags=42%, list=10%, signal=47%
GO_NEGATIVE_REGULATION_OF_PROTEIN_CONTAINING_COMPLEX_DISASSEMBLY	GO_NEGATIVE_REGULATION_OF_PROTEIN_CONTAINING_COMPLEX_DISASSEMBLY		79	0.54913	1.81906	0	0.0828769	0.618	4904	tags=34%, list=9%, signal=37%
GO_REGULATION_OF_SISTER_CHROMATID_COHESION	GO_REGULATION_OF_SISTER_CHROMATID_COHESION		21	0.722526	1.81814	0.0020202	0.0829909	0.621	4836	tags=62%, list=9%, signal=68%
GO_NEGATIVE_REGULATION_OF_MACROAUTOPHAGY	GO_NEGATIVE_REGULATION_OF_MACROAUTOPHAGY		34	0.601153	1.81614	0	0.0840491	0.622	5487	tags=47%, list=10%, signal=52%
GO_CELL_CELL_JUNCTION_ORGANIZATION	GO_CELL_CELL_JUNCTION_ORGANIZATION		210	0.481961	1.81546	0.00403226	0.0839549	0.623	5513	tags=33%, list=10%, signal=37%
GO_NEGATIVE_REGULATION_OF_ACTIN_FILAMENT_POLYMERIZATION	GO_NEGATIVE_REGULATION_OF_ACTIN_FILAMENT_POLYMERIZATION		62	0.513868	1.81476	0	0.0838085	0.625	2144	tags=27%, list=4%, signal=28%
GO_HISTONE_H2A_UBIQUITINATION	GO_HISTONE_H2A_UBIQUITINATION		26	0.656169	1.81473	0.00407332	0.0831238	0.625	4177	tags=54%, list=8%, signal=58%
GO_PEPTIDE_CATABOLIC_PROCESS	GO_PEPTIDE_CATABOLIC_PROCESS		30	0.555033	1.81433	0.00389864	0.0828218	0.626	3391	tags=33%, list=6%, signal=35%
GO_NEGATIVE_REGULATION_OF_RESPONSE_TO_OXIDATIVE_STRESS	GO_NEGATIVE_REGULATION_OF_RESPONSE_TO_OXIDATIVE_STRESS		48	0.519529	1.81432	0	0.0821495	0.626	3310	tags=29%, list=6%, signal=31%
GO_PHOSPHOLIPID_DEPHOSPHORYLATION	GO_PHOSPHOLIPID_DEPHOSPHORYLATION		45	0.599283	1.81429	0.00208333	0.081495	0.626	6829	tags=51%, list=12%, signal=58%
GO_POSITIVE_REGULATION_OF_ENDOCYTOSIS	GO_POSITIVE_REGULATION_OF_ENDOCYTOSIS		99	0.497775	1.8134	0.00207469	0.0816409	0.628	6479	tags=41%, list=12%, signal=47%
GO_RNA_DEPENDENT_DNA_BIOSYNTHETIC_PROCESS	GO_RNA_DEPENDENT_DNA_BIOSYNTHETIC_PROCESS		71	0.612035	1.81216	0.0125786	0.0820706	0.632	5764	tags=52%, list=10%, signal=58%
GO_NEGATIVE_REGULATION_OF_ACTIN_FILAMENT_DEPOLYMERIZATION	GO_NEGATIVE_REGULATION_OF_ACTIN_FILAMENT_DEPOLYMERIZATION		43	0.566128	1.81054	0	0.0827815	0.639	3369	tags=33%, list=6%, signal=35%
GO_REGULATION_OF_PROTEIN_LOCALIZATION_TO_CELL_SURFACE	GO_REGULATION_OF_PROTEIN_LOCALIZATION_TO_CELL_SURFACE		41	0.543495	1.81012	0.00416667	0.0825798	0.64	5475	tags=37%, list=10%, signal=41%
GO_SISTER_CHROMATID_COHESION	GO_SISTER_CHROMATID_COHESION		62	0.617188	1.80886	0	0.0829958	0.643	5311	tags=47%, list=10%, signal=52%
GO_DOSAGE_COMPENSATION	GO_DOSAGE_COMPENSATION		17	0.7267	1.80883	0	0.0823742	0.643	8765	tags=76%, list=16%, signal=91%
GO_BETA_CATENIN_DESTRUCTION_COMPLEX_DISASSEMBLY	GO_BETA_CATENIN_DESTRUCTION_COMPLEX_DISASSEMBLY		21	0.628377	1.80811	0.00583658	0.0822459	0.643	6020	tags=48%, list=11%, signal=53%
GO_RESPONSE_TO_ANGIOTENSIN	GO_RESPONSE_TO_ANGIOTENSIN		27	0.612606	1.80798	0.00431035	0.081718	0.644	7902	tags=44%, list=14%, signal=52%
GO_MEMBRANE_PROTEIN_INTRACELLULAR_DOMAIN_PROTEOLYSIS	GO_MEMBRANE_PROTEIN_INTRACELLULAR_DOMAIN_PROTEOLYSIS		18	0.699723	1.8079	0.00598802	0.0811947	0.644	5429	tags=72%, list=10%, signal=80%
GO_VESICLE_MEDIATED_TRANSPORT_TO_THE_PLASMA_MEMBRANE	GO_VESICLE_MEDIATED_TRANSPORT_TO_THE_PLASMA_MEMBRANE		93	0.543955	1.80722	0	0.0811765	0.646	5624	tags=44%, list=10%, signal=49%
GO_PROTEIN_LOCALIZATION_TO_ENDOSOME	GO_PROTEIN_LOCALIZATION_TO_ENDOSOME		25	0.688512	1.80721	0.00610998	0.0805818	0.646	5017	tags=56%, list=9%, signal=62%
GO_MEMBRANE_PROTEIN_ECTODOMAIN_PROTEOLYSIS	GO_MEMBRANE_PROTEIN_ECTODOMAIN_PROTEOLYSIS		42	0.593328	1.80671	0.00608519	0.0803619	0.647	7773	tags=57%, list=14%, signal=66%
GO_REGULATION_OF_PROTEIN_CATABOLIC_PROCESS	GO_REGULATION_OF_PROTEIN_CATABOLIC_PROCESS		393	0.462346	1.80643	0.00204918	0.0799869	0.647	5372	tags=35%, list=10%, signal=39%
GO_NEGATIVE_REGULATION_OF_PROTEIN_CONTAINING_COMPLEX_ASSEMBLY	GO_NEGATIVE_REGULATION_OF_PROTEIN_CONTAINING_COMPLEX_ASSEMBLY		137	0.463499	1.80572	0	0.0800358	0.648	4530	tags=31%, list=8%, signal=33%
GO_MEMBRANE_PROTEIN_PROTEOLYSIS	GO_MEMBRANE_PROTEIN_PROTEOLYSIS		61	0.555053	1.80496	0.00622407	0.0800457	0.649	5929	tags=49%, list=11%, signal=55%
GO_MITOTIC_G2_M_TRANSITION_CHECKPOINT	GO_MITOTIC_G2_M_TRANSITION_CHECKPOINT		31	0.648141	1.80402	0.00607288	0.0804288	0.652	6030	tags=42%, list=11%, signal=47%
GO_REGULATION_OF_OXIDATIVE_STRESS_INDUCED_CELL_DEATH	GO_REGULATION_OF_OXIDATIVE_STRESS_INDUCED_CELL_DEATH		64	0.501632	1.80373	0.00211864	0.0801591	0.654	4787	tags=34%, list=9%, signal=38%
GO_NEGATIVE_REGULATION_OF_TELOMERE_MAINTENANCE	GO_NEGATIVE_REGULATION_OF_TELOMERE_MAINTENANCE		36	0.665127	1.80271	0.010352	0.080323	0.654	5365	tags=58%, list=10%, signal=65%
GO_MODULATION_BY_HOST_OF_SYMBIONT_PROCESS	GO_MODULATION_BY_HOST_OF_SYMBIONT_PROCESS		62	0.521246	1.80264	0	0.0797879	0.654	6044	tags=44%, list=11%, signal=49%
GO_FIBROBLAST_GROWTH_FACTOR_RECEPTOR_SIGNALING_PATHWAY	GO_FIBROBLAST_GROWTH_FACTOR_RECEPTOR_SIGNALING_PATHWAY		114	0.498468	1.80211	0.00603622	0.0795939	0.655	5452	tags=33%, list=10%, signal=37%
GO_POST_GOLGI_VESICLE_MEDIATED_TRANSPORT	GO_POST_GOLGI_VESICLE_MEDIATED_TRANSPORT		104	0.573923	1.79932	0.00207469	0.081534	0.664	5624	tags=45%, list=10%, signal=50%
GO_POSITIVE_REGULATION_OF_NEURON_PROJECTION_DEVELOPMENT	GO_POSITIVE_REGULATION_OF_NEURON_PROJECTION_DEVELOPMENT		290	0.476879	1.79854	0	0.0816171	0.665	5700	tags=36%, list=10%, signal=39%
GO_POSITIVE_REGULATION_OF_MITOTIC_CELL_CYCLE	GO_POSITIVE_REGULATION_OF_MITOTIC_CELL_CYCLE		165	0.500774	1.79776	0	0.0815936	0.667	5473	tags=35%, list=10%, signal=38%
GO_ESTABLISHMENT_OF_ENDOTHELIAL_BARRIER	GO_ESTABLISHMENT_OF_ENDOTHELIAL_BARRIER		46	0.589294	1.79706	0.00757576	0.0816819	0.672	3219	tags=35%, list=6%, signal=37%
GO_LENS_MORPHOGENESIS_IN_CAMERA_TYPE_EYE	GO_LENS_MORPHOGENESIS_IN_CAMERA_TYPE_EYE		22	0.613681	1.79683	0.00588235	0.0813786	0.673	7519	tags=50%, list=14%, signal=58%
GO_DENDRITE_DEVELOPMENT	GO_DENDRITE_DEVELOPMENT		246	0.50398	1.79655	0.00205339	0.081141	0.675	5914	tags=40%, list=11%, signal=44%
GO_PINOCYTOSIS	GO_PINOCYTOSIS		23	0.637341	1.79616	0.00829876	0.0809393	0.675	4658	tags=52%, list=8%, signal=57%
GO_REGULATION_OF_GENE_SILENCING	GO_REGULATION_OF_GENE_SILENCING		99	0.562969	1.79441	0.00803213	0.0820655	0.678	6688	tags=49%, list=12%, signal=56%
GO_REGULATION_OF_PEPTIDYL_THREONINE_PHOSPHORYLATION	GO_REGULATION_OF_PEPTIDYL_THREONINE_PHOSPHORYLATION		47	0.547844	1.79422	0.00409836	0.0816594	0.679	3338	tags=36%, list=6%, signal=38%
GO_REGULATION_OF_BICELLULAR_TIGHT_JUNCTION_ASSEMBLY	GO_REGULATION_OF_BICELLULAR_TIGHT_JUNCTION_ASSEMBLY		23	0.638959	1.79382	0.00622407	0.0814912	0.679	4357	tags=43%, list=8%, signal=47%
GO_CHROMATIN_REMODELING	GO_CHROMATIN_REMODELING		185	0.542225	1.79294	0.00831601	0.0816723	0.686	5305	tags=42%, list=10%, signal=46%
GO_POSITIVE_REGULATION_OF_MRNA_METABOLIC_PROCESS	GO_POSITIVE_REGULATION_OF_MRNA_METABOLIC_PROCESS		82	0.569397	1.7929	0.00609756	0.081211	0.686	6044	tags=43%, list=11%, signal=48%
GO_ALTERNATIVE_MRNA_SPLICING_VIA_SPLICEOSOME	GO_ALTERNATIVE_MRNA_SPLICING_VIA_SPLICEOSOME		87	0.620416	1.79286	0.00604839	0.0807462	0.686	8065	tags=52%, list=15%, signal=60%
GO_TELOMERE_CAPPING	GO_TELOMERE_CAPPING		40	0.628625	1.79257	0.01222	0.0804769	0.687	5546	tags=48%, list=10%, signal=53%
GO_REGULATION_OF_SYNAPSE_STRUCTURE_OR_ACTIVITY	GO_REGULATION_OF_SYNAPSE_STRUCTURE_OR_ACTIVITY		239	0.468076	1.79256	0.00207039	0.0799792	0.687	5475	tags=32%, list=10%, signal=36%
GO_POSITIVE_REGULATION_OF_AXON_EXTENSION	GO_POSITIVE_REGULATION_OF_AXON_EXTENSION		43	0.585133	1.79199	0.0100604	0.079893	0.687	7009	tags=49%, list=13%, signal=56%
GO_O_GLYCAN_PROCESSING	GO_O_GLYCAN_PROCESSING		60	0.513165	1.79158	0.00205339	0.0797041	0.687	3095	tags=23%, list=6%, signal=25%
GO_SPHINGOLIPID_METABOLIC_PROCESS	GO_SPHINGOLIPID_METABOLIC_PROCESS		160	0.461812	1.79149	0.00209205	0.0793102	0.687	7029	tags=41%, list=13%, signal=46%
GO_POSITIVE_REGULATION_OF_PROTEIN_POLYMERIZATION	GO_POSITIVE_REGULATION_OF_PROTEIN_POLYMERIZATION		136	0.484048	1.79115	0.00604839	0.0790925	0.687	5956	tags=43%, list=11%, signal=48%
GO_HETEROCHROMATIN_ORGANIZATION	GO_HETEROCHROMATIN_ORGANIZATION		49	0.597726	1.79073	0.013834	0.0789856	0.687	4401	tags=51%, list=8%, signal=55%
GO_REGULATION_OF_AMYLOID_BETA_FORMATION	GO_REGULATION_OF_AMYLOID_BETA_FORMATION		33	0.576703	1.78985	0.00204918	0.0791488	0.688	5332	tags=48%, list=10%, signal=54%
GO_CENTRAL_NERVOUS_SYSTEM_NEURON_AXONOGENESIS	GO_CENTRAL_NERVOUS_SYSTEM_NEURON_AXONOGENESIS		36	0.591431	1.78912	0	0.0791981	0.688	5637	tags=44%, list=10%, signal=49%
GO_POSITIVE_REGULATION_OF_GLIAL_CELL_PROLIFERATION	GO_POSITIVE_REGULATION_OF_GLIAL_CELL_PROLIFERATION		19	0.649667	1.78869	0.00211416	0.0790163	0.688	5487	tags=42%, list=10%, signal=47%
GO_MITOTIC_SPINDLE_ASSEMBLY	GO_MITOTIC_SPINDLE_ASSEMBLY		65	0.60203	1.78826	0.0105485	0.0789556	0.688	8276	tags=54%, list=15%, signal=63%
GO_ESTABLISHMENT_OF_CELL_POLARITY	GO_ESTABLISHMENT_OF_CELL_POLARITY		140	0.51884	1.78738	0.0140562	0.0792498	0.689	3897	tags=35%, list=7%, signal=38%
GO_NEGATIVE_REGULATION_OF_DNA_REPAIR	GO_NEGATIVE_REGULATION_OF_DNA_REPAIR		35	0.595801	1.78676	0.012	0.0793864	0.691	7103	tags=49%, list=13%, signal=56%
GO_POSITIVE_REGULATION_OF_PROTEIN_CATABOLIC_PROCESS	GO_POSITIVE_REGULATION_OF_PROTEIN_CATABOLIC_PROCESS		224	0.460162	1.78607	0	0.0794884	0.694	5480	tags=37%, list=10%, signal=41%
GO_CONNECTIVE_TISSUE_REPLACEMENT	GO_CONNECTIVE_TISSUE_REPLACEMENT		16	0.677144	1.7859	0.00819672	0.0791656	0.694	3304	tags=25%, list=6%, signal=27%
GO_REGULATION_OF_CELL_AGING	GO_REGULATION_OF_CELL_AGING		53	0.532249	1.78564	0.00817996	0.0788834	0.694	7255	tags=38%, list=13%, signal=43%
GO_PROTEIN_DESTABILIZATION	GO_PROTEIN_DESTABILIZATION		50	0.563979	1.78556	0.00622407	0.0784919	0.694	4866	tags=42%, list=9%, signal=46%
GO_DNA_REPLICATION_INITIATION	GO_DNA_REPLICATION_INITIATION		39	0.670494	1.78523	0.0104167	0.0783008	0.694	8982	tags=64%, list=16%, signal=76%
GO_PROTEIN_LOCALIZATION_TO_CELL_SURFACE	GO_PROTEIN_LOCALIZATION_TO_CELL_SURFACE		66	0.503487	1.78516	0.00209644	0.0779163	0.694	5555	tags=36%, list=10%, signal=40%
GO_TELOMERE_MAINTENANCE_VIA_TELOMERE_LENGTHENING	GO_TELOMERE_MAINTENANCE_VIA_TELOMERE_LENGTHENING		81	0.591079	1.78452	0.0127119	0.077997	0.697	6437	tags=51%, list=12%, signal=57%
GO_HISTONE_H3_ACETYLATION	GO_HISTONE_H3_ACETYLATION		60	0.583029	1.78407	0.00409836	0.0778621	0.698	5473	tags=42%, list=10%, signal=46%
GO_NEGATIVE_REGULATION_OF_GENE_SILENCING	GO_NEGATIVE_REGULATION_OF_GENE_SILENCING		26	0.60694	1.78281	0.00208333	0.0783361	0.699	6548	tags=46%, list=12%, signal=52%
GO_SUBSTRATE_ADHESION_DEPENDENT_CELL_SPREADING	GO_SUBSTRATE_ADHESION_DEPENDENT_CELL_SPREADING		106	0.519137	1.78265	0.0103734	0.078095	0.699	3897	tags=36%, list=7%, signal=38%
GO_POSITIVE_REGULATION_OF_DNA_TEMPLATED_TRANSCRIPTION_ELONGATION	GO_POSITIVE_REGULATION_OF_DNA_TEMPLATED_TRANSCRIPTION_ELONGATION		27	0.687643	1.78264	0.00622407	0.0776696	0.699	8316	tags=67%, list=15%, signal=78%
GO_AXONAL_FASCICULATION	GO_AXONAL_FASCICULATION		23	0.624625	1.78233	0.010142	0.077486	0.7	6689	tags=52%, list=12%, signal=59%
GO_REGULATION_OF_SUPRAMOLECULAR_FIBER_ORGANIZATION	GO_REGULATION_OF_SUPRAMOLECULAR_FIBER_ORGANIZATION		361	0.452666	1.78228	0.00406504	0.0771252	0.701	5956	tags=37%, list=11%, signal=41%
GO_REGULATION_OF_DENDRITIC_SPINE_DEVELOPMENT	GO_REGULATION_OF_DENDRITIC_SPINE_DEVELOPMENT		78	0.55823	1.78207	0.00400802	0.0768489	0.702	6829	tags=46%, list=12%, signal=53%
GO_POSITIVE_REGULATION_OF_PROTEIN_LOCALIZATION_TO_MEMBRANE	GO_POSITIVE_REGULATION_OF_PROTEIN_LOCALIZATION_TO_MEMBRANE		126	0.462813	1.78151	0	0.0768186	0.702	4780	tags=31%, list=9%, signal=34%
GO_REGULATION_OF_TELOMERE_MAINTENANCE_VIA_TELOMERE_LENGTHENING	GO_REGULATION_OF_TELOMERE_MAINTENANCE_VIA_TELOMERE_LENGTHENING		61	0.61793	1.78112	0.0150215	0.0767602	0.703	5764	tags=49%, list=10%, signal=55%
GO_RESPONSE_TO_IONIZING_RADIATION	GO_RESPONSE_TO_IONIZING_RADIATION		142	0.523572	1.78066	0.0128205	0.0766951	0.703	6280	tags=43%, list=11%, signal=48%
GO_NEGATIVE_REGULATION_OF_FATTY_ACID_BIOSYNTHETIC_PROCESS	GO_NEGATIVE_REGULATION_OF_FATTY_ACID_BIOSYNTHETIC_PROCESS		21	0.599578	1.77921	0.0020202	0.0774531	0.705	8032	tags=33%, list=15%, signal=39%
GO_ESTABLISHMENT_OF_SPINDLE_ORIENTATION	GO_ESTABLISHMENT_OF_SPINDLE_ORIENTATION		36	0.60693	1.77835	0.00819672	0.0777385	0.71	5782	tags=47%, list=10%, signal=53%
GO_NEGATIVE_REGULATION_OF_I_KAPPAB_KINASE_NF_KAPPAB_SIGNALING	GO_NEGATIVE_REGULATION_OF_I_KAPPAB_KINASE_NF_KAPPAB_SIGNALING		50	0.554281	1.77817	0	0.0775011	0.71	4819	tags=36%, list=9%, signal=39%
GO_REGULATION_OF_RAS_PROTEIN_SIGNAL_TRANSDUCTION	GO_REGULATION_OF_RAS_PROTEIN_SIGNAL_TRANSDUCTION		194	0.49464	1.77792	0.00803213	0.0772583	0.71	6090	tags=38%, list=11%, signal=43%
GO_CELL_CELL_ADHESION_VIA_PLASMA_MEMBRANE_ADHESION_MOLECULES	GO_CELL_CELL_ADHESION_VIA_PLASMA_MEMBRANE_ADHESION_MOLECULES		277	0.475197	1.77751	0.010142	0.0772263	0.712	7719	tags=34%, list=14%, signal=39%
GO_DENDRITIC_SPINE_MORPHOGENESIS	GO_DENDRITIC_SPINE_MORPHOGENESIS		62	0.549574	1.77732	0.00788955	0.0769939	0.712	4682	tags=37%, list=8%, signal=40%
GO_REGULATION_OF_DOUBLE_STRAND_BREAK_REPAIR_VIA_HOMOLOGOUS_RECOMBINATION	GO_REGULATION_OF_DOUBLE_STRAND_BREAK_REPAIR_VIA_HOMOLOGOUS_RECOMBINATION		46	0.59873	1.77699	0.0120968	0.076928	0.713	7103	tags=48%, list=13%, signal=55%
GO_POSITIVE_REGULATION_OF_ERYTHROCYTE_DIFFERENTIATION	GO_POSITIVE_REGULATION_OF_ERYTHROCYTE_DIFFERENTIATION		34	0.596036	1.7769	0.00606061	0.0765794	0.713	5228	tags=50%, list=9%, signal=55%
GO_VESICLE_CYTOSKELETAL_TRAFFICKING	GO_VESICLE_CYTOSKELETAL_TRAFFICKING		75	0.542359	1.77645	0.008	0.0765533	0.714	6541	tags=45%, list=12%, signal=51%
GO_REGULATION_OF_AMYLOID_PRECURSOR_PROTEIN_CATABOLIC_PROCESS	GO_REGULATION_OF_AMYLOID_PRECURSOR_PROTEIN_CATABOLIC_PROCESS		40	0.535192	1.7763	0.00408998	0.0762401	0.714	3474	tags=38%, list=6%, signal=40%
GO_VASCULAR_ENDOTHELIAL_GROWTH_FACTOR_RECEPTOR_SIGNALING_PATHWAY	GO_VASCULAR_ENDOTHELIAL_GROWTH_FACTOR_RECEPTOR_SIGNALING_PATHWAY		95	0.503489	1.77542	0.0040404	0.0765214	0.715	4658	tags=38%, list=8%, signal=41%
GO_REGULATION_OF_EXTRINSIC_APOPTOTIC_SIGNALING_PATHWAY	GO_REGULATION_OF_EXTRINSIC_APOPTOTIC_SIGNALING_PATHWAY		160	0.481211	1.77526	0.00401606	0.0762281	0.715	6000	tags=33%, list=11%, signal=36%
GO_FOREBRAIN_CELL_MIGRATION	GO_FOREBRAIN_CELL_MIGRATION		57	0.551289	1.77437	0.00206612	0.07653	0.719	5288	tags=39%, list=10%, signal=43%
GO_REGULATION_OF_EARLY_ENDOSOME_TO_LATE_ENDOSOME_TRANSPORT	GO_REGULATION_OF_EARLY_ENDOSOME_TO_LATE_ENDOSOME_TRANSPORT		17	0.706643	1.77401	0.0103093	0.0763995	0.721	5999	tags=65%, list=11%, signal=73%
GO_RECOMBINATIONAL_REPAIR	GO_RECOMBINATIONAL_REPAIR		136	0.556859	1.77368	0.0123457	0.0763343	0.722	7204	tags=48%, list=13%, signal=55%
GO_CELLULAR_COMPONENT_MAINTENANCE	GO_CELLULAR_COMPONENT_MAINTENANCE		61	0.513777	1.77291	0.00965251	0.0765152	0.725	5956	tags=41%, list=11%, signal=46%
GO_REGULATION_OF_DENDRITIC_SPINE_MORPHOGENESIS	GO_REGULATION_OF_DENDRITIC_SPINE_MORPHOGENESIS		48	0.565511	1.77243	0.00790514	0.0764807	0.729	4682	tags=38%, list=8%, signal=41%
GO_REGULATION_OF_LAMELLIPODIUM_ORGANIZATION	GO_REGULATION_OF_LAMELLIPODIUM_ORGANIZATION		49	0.550413	1.77142	0.00854701	0.0769107	0.731	5729	tags=41%, list=10%, signal=45%
GO_LENS_DEVELOPMENT_IN_CAMERA_TYPE_EYE	GO_LENS_DEVELOPMENT_IN_CAMERA_TYPE_EYE		83	0.503446	1.77055	0.00413223	0.0771301	0.734	5250	tags=35%, list=9%, signal=39%
GO_EXPLORATION_BEHAVIOR	GO_EXPLORATION_BEHAVIOR		25	0.597373	1.77019	0.00209205	0.077031	0.736	5332	tags=36%, list=10%, signal=40%
GO_REGULATION_OF_FIBROBLAST_GROWTH_FACTOR_RECEPTOR_SIGNALING_PATHWAY	GO_REGULATION_OF_FIBROBLAST_GROWTH_FACTOR_RECEPTOR_SIGNALING_PATHWAY		37	0.549277	1.76994	0.00961539	0.0768693	0.737	5235	tags=35%, list=9%, signal=39%
GO_REGULATION_OF_HISTONE_H3_K9_METHYLATION	GO_REGULATION_OF_HISTONE_H3_K9_METHYLATION		22	0.641923	1.76955	0.0040568	0.0768103	0.739	3438	tags=45%, list=6%, signal=48%
GO_HISTONE_H2A_MONOUBIQUITINATION	GO_HISTONE_H2A_MONOUBIQUITINATION		17	0.675956	1.76888	0.00604839	0.0770095	0.739	10313	tags=76%, list=19%, signal=94%
GO_REGULATION_OF_DENDRITE_MORPHOGENESIS	GO_REGULATION_OF_DENDRITE_MORPHOGENESIS		95	0.50942	1.76842	0.00785855	0.07689	0.74	4682	tags=35%, list=8%, signal=38%
GO_STRESS_GRANULE_ASSEMBLY	GO_STRESS_GRANULE_ASSEMBLY		23	0.697656	1.76826	0	0.0766357	0.74	6226	tags=70%, list=11%, signal=78%
GO_SELECTIVE_AUTOPHAGY	GO_SELECTIVE_AUTOPHAGY		60	0.553563	1.76725	0.00407332	0.0771016	0.74	3943	tags=45%, list=7%, signal=48%
GO_FILOPODIUM_ASSEMBLY	GO_FILOPODIUM_ASSEMBLY		60	0.532282	1.76721	0.00618557	0.0767681	0.74	3619	tags=40%, list=7%, signal=43%
GO_REGULATION_OF_MRNA_SPLICING_VIA_SPLICEOSOME	GO_REGULATION_OF_MRNA_SPLICING_VIA_SPLICEOSOME		113	0.578673	1.76456	0.01	0.0785911	0.749	8065	tags=48%, list=15%, signal=56%
GO_REGULATION_OF_SMALL_GTPASE_MEDIATED_SIGNAL_TRANSDUCTION	GO_REGULATION_OF_SMALL_GTPASE_MEDIATED_SIGNAL_TRANSDUCTION		321	0.482004	1.76368	0.0137795	0.0788406	0.753	6090	tags=37%, list=11%, signal=42%
GO_CELLULAR_SENESCENCE	GO_CELLULAR_SENESCENCE		71	0.505121	1.76365	0.0104167	0.0785004	0.753	5886	tags=38%, list=11%, signal=43%
GO_CELL_DEATH_IN_RESPONSE_TO_OXIDATIVE_STRESS	GO_CELL_DEATH_IN_RESPONSE_TO_OXIDATIVE_STRESS		84	0.486742	1.76361	0.00215517	0.078178	0.753	4787	tags=33%, list=9%, signal=36%
GO_REGULATION_OF_RNA_SPLICING	GO_REGULATION_OF_RNA_SPLICING		155	0.5647	1.76285	0.01002	0.0784931	0.754	8065	tags=50%, list=15%, signal=59%
GO_NEURAL_TUBE_DEVELOPMENT	GO_NEURAL_TUBE_DEVELOPMENT		163	0.504403	1.7626	0.0185567	0.0783087	0.755	6224	tags=42%, list=11%, signal=48%
GO_POSITIVE_REGULATION_OF_CELL_CYCLE_PHASE_TRANSITION	GO_POSITIVE_REGULATION_OF_CELL_CYCLE_PHASE_TRANSITION		108	0.502087	1.76228	0.00606061	0.0781768	0.756	5755	tags=33%, list=10%, signal=37%
GO_REGULATION_OF_NUCLEASE_ACTIVITY	GO_REGULATION_OF_NUCLEASE_ACTIVITY		22	0.622155	1.76188	0.0103306	0.0780999	0.757	7437	tags=45%, list=13%, signal=53%
GO_EXTRINSIC_APOPTOTIC_SIGNALING_PATHWAY_VIA_DEATH_DOMAIN_RECEPTORS	GO_EXTRINSIC_APOPTOTIC_SIGNALING_PATHWAY_VIA_DEATH_DOMAIN_RECEPTORS		89	0.498176	1.7616	0.00410678	0.0780163	0.76	5312	tags=36%, list=10%, signal=40%
GO_DNA_INTEGRITY_CHECKPOINT	GO_DNA_INTEGRITY_CHECKPOINT		159	0.552359	1.76121	0.0105932	0.0779642	0.76	5372	tags=38%, list=10%, signal=42%
GO_TELOMERE_ORGANIZATION	GO_TELOMERE_ORGANIZATION		147	0.557811	1.76107	0.00847458	0.0777481	0.76	6437	tags=46%, list=12%, signal=52%
GO_MEMBRANE_BIOGENESIS	GO_MEMBRANE_BIOGENESIS		44	0.496325	1.76062	0.00392927	0.077715	0.76	5708	tags=34%, list=10%, signal=38%
GO_PHOSPHATIDYLSERINE_METABOLIC_PROCESS	GO_PHOSPHATIDYLSERINE_METABOLIC_PROCESS		33	0.559966	1.75966	0.00214133	0.0781045	0.763	4729	tags=36%, list=9%, signal=40%
GO_NEGATIVE_REGULATION_OF_SYNAPSE_ORGANIZATION	GO_NEGATIVE_REGULATION_OF_SYNAPSE_ORGANIZATION		25	0.583566	1.75917	0.00824742	0.0781047	0.763	3807	tags=36%, list=7%, signal=39%
GO_GANGLION_DEVELOPMENT	GO_GANGLION_DEVELOPMENT		16	0.673558	1.75901	0.00801603	0.0779029	0.763	5291	tags=50%, list=10%, signal=55%
GO_POSTSYNAPTIC_MEMBRANE_ORGANIZATION	GO_POSTSYNAPTIC_MEMBRANE_ORGANIZATION		41	0.517191	1.75831	0.0102249	0.0780787	0.763	5332	tags=34%, list=10%, signal=38%
GO_DNA_CONFORMATION_CHANGE	GO_DNA_CONFORMATION_CHANGE		281	0.531279	1.75678	0.0167364	0.0788761	0.765	5354	tags=42%, list=10%, signal=46%
GO_NEGATIVE_REGULATION_OF_AXON_GUIDANCE	GO_NEGATIVE_REGULATION_OF_AXON_GUIDANCE		28	0.611523	1.75567	0.016129	0.0793581	0.768	4796	tags=50%, list=9%, signal=55%
GO_MAGNESIUM_ION_TRANSPORT	GO_MAGNESIUM_ION_TRANSPORT		17	0.702922	1.75544	0.0143737	0.0791775	0.768	4146	tags=53%, list=8%, signal=57%
GO_PROTEIN_K48_LINKED_UBIQUITINATION	GO_PROTEIN_K48_LINKED_UBIQUITINATION		56	0.583828	1.75479	0.0105042	0.0793594	0.77	7565	tags=59%, list=14%, signal=68%
GO_REGULATION_OF_ERYTHROCYTE_DIFFERENTIATION	GO_REGULATION_OF_ERYTHROCYTE_DIFFERENTIATION		50	0.551118	1.75346	0.010101	0.0801072	0.772	5228	tags=48%, list=9%, signal=53%
GO_REGULATION_OF_DOUBLE_STRAND_BREAK_REPAIR	GO_REGULATION_OF_DOUBLE_STRAND_BREAK_REPAIR		84	0.540913	1.75314	0.0102881	0.0800165	0.772	5672	tags=40%, list=10%, signal=45%
GO_HIPPO_SIGNALING	GO_HIPPO_SIGNALING		43	0.632873	1.75294	0.0281125	0.0797955	0.772	5103	tags=51%, list=9%, signal=56%
GO_CELL_CELL_JUNCTION_ASSEMBLY	GO_CELL_CELL_JUNCTION_ASSEMBLY		147	0.462196	1.751	0.00601202	0.0809418	0.776	4357	tags=31%, list=8%, signal=33%
GO_REGULATION_OF_KERATINOCYTE_PROLIFERATION	GO_REGULATION_OF_KERATINOCYTE_PROLIFERATION		38	0.584326	1.75072	0.0161943	0.0808089	0.778	5863	tags=39%, list=11%, signal=44%
GO_PROTEIN_TARGETING_TO_VACUOLE	GO_PROTEIN_TARGETING_TO_VACUOLE		40	0.627807	1.75064	0.0121457	0.0805112	0.778	3963	tags=50%, list=7%, signal=54%
GO_POSITIVE_REGULATION_OF_CATABOLIC_PROCESS	GO_POSITIVE_REGULATION_OF_CATABOLIC_PROCESS		451	0.453994	1.75005	0.00207469	0.0805973	0.779	5913	tags=37%, list=11%, signal=42%
GO_ESTABLISHMENT_OF_PROTEIN_LOCALIZATION_TO_POSTSYNAPTIC_MEMBRANE	GO_ESTABLISHMENT_OF_PROTEIN_LOCALIZATION_TO_POSTSYNAPTIC_MEMBRANE		17	0.635336	1.74942	0.0104384	0.0807477	0.781	4312	tags=47%, list=8%, signal=51%
GO_POSITIVE_REGULATION_OF_MRNA_PROCESSING	GO_POSITIVE_REGULATION_OF_MRNA_PROCESSING		33	0.603985	1.74911	0.00603622	0.0806198	0.781	7555	tags=45%, list=14%, signal=53%
GO_REGULATION_OF_DNA_RECOMBINATION	GO_REGULATION_OF_DNA_RECOMBINATION		96	0.554311	1.74896	0.0168421	0.0803454	0.781	6569	tags=40%, list=12%, signal=45%
GO_MICROTUBULE_ANCHORING	GO_MICROTUBULE_ANCHORING		24	0.695382	1.74837	0.00613497	0.080535	0.782	3497	tags=46%, list=6%, signal=49%
GO_REGULATION_OF_UBIQUITIN_DEPENDENT_PROTEIN_CATABOLIC_PROCESS	GO_REGULATION_OF_UBIQUITIN_DEPENDENT_PROTEIN_CATABOLIC_PROCESS		158	0.476152	1.74804	0.00616016	0.0805417	0.784	5480	tags=35%, list=10%, signal=39%
GO_REGULATION_OF_CELL_CYCLE_G1_S_PHASE_TRANSITION	GO_REGULATION_OF_CELL_CYCLE_G1_S_PHASE_TRANSITION		194	0.466591	1.74798	0.00421053	0.0802681	0.784	5701	tags=31%, list=10%, signal=35%
GO_REGULATION_OF_AUTOPHAGY_OF_MITOCHONDRION	GO_REGULATION_OF_AUTOPHAGY_OF_MITOCHONDRION		43	0.54843	1.74745	0.0103734	0.0803407	0.785	3681	tags=37%, list=7%, signal=40%
GO_POSITIVE_REGULATION_OF_RECEPTOR_MEDIATED_ENDOCYTOSIS	GO_POSITIVE_REGULATION_OF_RECEPTOR_MEDIATED_ENDOCYTOSIS		51	0.498317	1.74745	0.0102459	0.0800168	0.785	7129	tags=43%, list=13%, signal=49%
GO_REGULATION_OF_ACTIN_FILAMENT_BASED_PROCESS	GO_REGULATION_OF_ACTIN_FILAMENT_BASED_PROCESS		394	0.442943	1.74683	0.00407332	0.0801654	0.788	5487	tags=33%, list=10%, signal=36%
GO_REGULATION_OF_CELL_PROJECTION_ASSEMBLY	GO_REGULATION_OF_CELL_PROJECTION_ASSEMBLY		180	0.45586	1.74585	0	0.0806096	0.791	6000	tags=39%, list=11%, signal=43%
GO_ESTABLISHMENT_OF_PLANAR_POLARITY_OF_EMBRYONIC_EPITHELIUM	GO_ESTABLISHMENT_OF_PLANAR_POLARITY_OF_EMBRYONIC_EPITHELIUM		17	0.655006	1.74413	0.0077821	0.0814507	0.792	6134	tags=53%, list=11%, signal=60%
GO_NEGATIVE_REGULATION_OF_AXON_EXTENSION	GO_NEGATIVE_REGULATION_OF_AXON_EXTENSION		43	0.544133	1.74352	0.00204918	0.0815475	0.795	5063	tags=42%, list=9%, signal=46%
GO_REGULATION_OF_TELOMERE_CAPPING	GO_REGULATION_OF_TELOMERE_CAPPING		26	0.617322	1.74257	0.00996016	0.082008	0.797	6437	tags=50%, list=12%, signal=57%
GO_POSITIVE_REGULATION_OF_CELLULAR_PROTEIN_LOCALIZATION	GO_POSITIVE_REGULATION_OF_CELLULAR_PROTEIN_LOCALIZATION		335	0.450771	1.74247	0.00639659	0.0817325	0.797	6000	tags=34%, list=11%, signal=38%
GO_DNA_GEOMETRIC_CHANGE	GO_DNA_GEOMETRIC_CHANGE		116	0.568525	1.74214	0.0188285	0.0816904	0.799	5204	tags=46%, list=9%, signal=50%
GO_POSITIVE_REGULATION_OF_PROTEIN_KINASE_B_SIGNALING	GO_POSITIVE_REGULATION_OF_PROTEIN_KINASE_B_SIGNALING		175	0.472718	1.74161	0.0063425	0.0818178	0.8	5487	tags=31%, list=10%, signal=34%
GO_NEURON_PROJECTION_GUIDANCE	GO_NEURON_PROJECTION_GUIDANCE		283	0.470687	1.74158	0.0120724	0.0815128	0.8	5704	tags=35%, list=10%, signal=39%
GO_VASCULOGENESIS	GO_VASCULOGENESIS		82	0.530565	1.74146	0.00808081	0.0812821	0.8	3999	tags=35%, list=7%, signal=38%
GO_POSITIVE_REGULATION_OF_CELLULAR_PROTEIN_CATABOLIC_PROCESS	GO_POSITIVE_REGULATION_OF_CELLULAR_PROTEIN_CATABOLIC_PROCESS		148	0.464021	1.74133	0	0.0811146	0.8	5480	tags=36%, list=10%, signal=40%
GO_REGULATION_OF_ACTIN_FILAMENT_LENGTH	GO_REGULATION_OF_ACTIN_FILAMENT_LENGTH		186	0.462395	1.74102	0.00612245	0.0810476	0.8	5956	tags=38%, list=11%, signal=43%
GO_PROTEIN_MONOUBIQUITINATION	GO_PROTEIN_MONOUBIQUITINATION		67	0.584447	1.74093	0.0105708	0.080807	0.801	7455	tags=60%, list=13%, signal=69%
GO_RAS_PROTEIN_SIGNAL_TRANSDUCTION	GO_RAS_PROTEIN_SIGNAL_TRANSDUCTION		345	0.476657	1.74063	0.0122951	0.0807745	0.804	6187	tags=39%, list=11%, signal=44%
GO_POSITIVE_REGULATION_OF_TELOMERASE_ACTIVITY	GO_POSITIVE_REGULATION_OF_TELOMERASE_ACTIVITY		36	0.598928	1.74039	0.012024	0.0806764	0.805	5764	tags=47%, list=10%, signal=53%
GO_NEGATIVE_REGULATION_OF_PROTEIN_POLYMERIZATION	GO_NEGATIVE_REGULATION_OF_PROTEIN_POLYMERIZATION		76	0.471854	1.73992	0.0019802	0.080789	0.806	4500	tags=29%, list=8%, signal=31%
GO_ENDOTHELIAL_CELL_DEVELOPMENT	GO_ENDOTHELIAL_CELL_DEVELOPMENT		64	0.536929	1.73979	0.0153257	0.0805671	0.806	3219	tags=31%, list=6%, signal=33%
GO_ACTIN_FILAMENT_ORGANIZATION	GO_ACTIN_FILAMENT_ORGANIZATION		424	0.441569	1.73861	0.00407332	0.0813266	0.809	5795	tags=35%, list=10%, signal=39%
GO_REGULATION_OF_MRNA_PROCESSING	GO_REGULATION_OF_MRNA_PROCESSING		152	0.560344	1.73853	0.012	0.0810984	0.809	8065	tags=48%, list=15%, signal=56%
GO_NEGATIVE_REGULATION_OF_NERVOUS_SYSTEM_DEVELOPMENT	GO_NEGATIVE_REGULATION_OF_NERVOUS_SYSTEM_DEVELOPMENT		313	0.439125	1.73846	0.00201613	0.0808502	0.809	5887	tags=34%, list=11%, signal=37%
GO_RETINAL_GANGLION_CELL_AXON_GUIDANCE	GO_RETINAL_GANGLION_CELL_AXON_GUIDANCE		20	0.596173	1.73679	0.00849257	0.0816973	0.813	2006	tags=35%, list=4%, signal=36%
GO_HISTONE_MONOUBIQUITINATION	GO_HISTONE_MONOUBIQUITINATION		29	0.643461	1.73648	0.00833333	0.0816695	0.813	7455	tags=66%, list=13%, signal=76%
GO_POSITIVE_REGULATION_OF_INTRACELLULAR_TRANSPORT	GO_POSITIVE_REGULATION_OF_INTRACELLULAR_TRANSPORT		220	0.46654	1.73638	0.00856531	0.0814117	0.814	5999	tags=38%, list=11%, signal=42%
GO_NEGATIVE_REGULATION_OF_KERATINOCYTE_PROLIFERATION	GO_NEGATIVE_REGULATION_OF_KERATINOCYTE_PROLIFERATION		18	0.648679	1.73608	0.0078125	0.0813425	0.814	5863	tags=50%, list=11%, signal=56%
GO_POSITIVE_REGULATION_OF_VASCULAR_ENDOTHELIAL_CELL_PROLIFERATION	GO_POSITIVE_REGULATION_OF_VASCULAR_ENDOTHELIAL_CELL_PROLIFERATION		23	0.586044	1.736	0.00400802	0.0810921	0.814	3203	tags=30%, list=6%, signal=32%
GO_REGULATION_OF_POSTSYNAPTIC_MEMBRANE_NEUROTRANSMITTER_RECEPTOR_LEVELS	GO_REGULATION_OF_POSTSYNAPTIC_MEMBRANE_NEUROTRANSMITTER_RECEPTOR_LEVELS		67	0.511724	1.73588	0.00204918	0.0808819	0.814	6631	tags=36%, list=12%, signal=41%
GO_NEGATIVE_REGULATION_OF_EXTRINSIC_APOPTOTIC_SIGNALING_PATHWAY_VIA_DEATH_DOMAIN_RECEPTORS	GO_NEGATIVE_REGULATION_OF_EXTRINSIC_APOPTOTIC_SIGNALING_PATHWAY_VIA_DEATH_DOMAIN_RECEPTORS		41	0.565376	1.73568	0.01417	0.0807451	0.815	5312	tags=37%, list=10%, signal=40%
GO_POSITIVE_REGULATION_OF_TELOMERE_MAINTENANCE_VIA_TELOMERE_LENGTHENING	GO_POSITIVE_REGULATION_OF_TELOMERE_MAINTENANCE_VIA_TELOMERE_LENGTHENING		37	0.632499	1.73515	0.014862	0.0808801	0.816	5764	tags=49%, list=10%, signal=54%
GO_RESPONSE_TO_INTERLEUKIN_6	GO_RESPONSE_TO_INTERLEUKIN_6		54	0.540021	1.73515	0.0121951	0.0805908	0.816	3155	tags=31%, list=6%, signal=33%
GO_PROTEIN_LOCALIZATION_TO_GOLGI_APPARATUS	GO_PROTEIN_LOCALIZATION_TO_GOLGI_APPARATUS		28	0.612896	1.73508	0.0122449	0.080348	0.816	6584	tags=61%, list=12%, signal=69%
GO_BRANCH_ELONGATION_OF_AN_EPITHELIUM	GO_BRANCH_ELONGATION_OF_AN_EPITHELIUM		19	0.658338	1.73481	0.0101833	0.0802913	0.816	7193	tags=53%, list=13%, signal=60%
GO_HOMOPHILIC_CELL_ADHESION_VIA_PLASMA_MEMBRANE_ADHESION_MOLECULES	GO_HOMOPHILIC_CELL_ADHESION_VIA_PLASMA_MEMBRANE_ADHESION_MOLECULES		168	0.499208	1.73467	0.0159681	0.0801235	0.816	8042	tags=39%, list=15%, signal=45%
GO_REGULATION_OF_CYTOPLASMIC_TRANSPORT	GO_REGULATION_OF_CYTOPLASMIC_TRANSPORT		25	0.635645	1.73465	0.0167015	0.0798476	0.816	5999	tags=60%, list=11%, signal=67%
GO_CORTICAL_ACTIN_CYTOSKELETON_ORGANIZATION	GO_CORTICAL_ACTIN_CYTOSKELETON_ORGANIZATION		39	0.582347	1.73366	0.0102881	0.0803172	0.816	2891	tags=41%, list=5%, signal=43%
GO_LAMELLIPODIUM_ORGANIZATION	GO_LAMELLIPODIUM_ORGANIZATION		85	0.508892	1.73319	0.00828157	0.0803975	0.818	5729	tags=41%, list=10%, signal=46%
GO_ACTIN_FILAMENT_DEPOLYMERIZATION	GO_ACTIN_FILAMENT_DEPOLYMERIZATION		57	0.530031	1.73316	0.00813008	0.080134	0.818	5734	tags=37%, list=10%, signal=41%
GO_HISTONE_H3_K4_TRIMETHYLATION	GO_HISTONE_H3_K4_TRIMETHYLATION		18	0.770633	1.7329	0.00589391	0.0800559	0.819	2312	tags=50%, list=4%, signal=52%
GO_SPERMATID_NUCLEUS_DIFFERENTIATION	GO_SPERMATID_NUCLEUS_DIFFERENTIATION		21	0.627503	1.73274	0.00412371	0.079972	0.82	2337	tags=33%, list=4%, signal=35%
GO_POSITIVE_REGULATION_OF_DNA_BIOSYNTHETIC_PROCESS	GO_POSITIVE_REGULATION_OF_DNA_BIOSYNTHETIC_PROCESS		69	0.553064	1.73261	0.0150862	0.0798443	0.822	4256	tags=36%, list=8%, signal=39%
GO_POSITIVE_REGULATION_OF_SUPRAMOLECULAR_FIBER_ORGANIZATION	GO_POSITIVE_REGULATION_OF_SUPRAMOLECULAR_FIBER_ORGANIZATION		205	0.456586	1.73139	0.00813008	0.0805173	0.825	5729	tags=38%, list=10%, signal=42%
GO_CELL_MIGRATION_IN_HINDBRAIN	GO_CELL_MIGRATION_IN_HINDBRAIN		15	0.675822	1.7309	0.00585938	0.0806123	0.828	4672	tags=47%, list=8%, signal=51%
GO_REGULATION_OF_CELL_SHAPE	GO_REGULATION_OF_CELL_SHAPE		153	0.48964	1.73001	0.00843882	0.081044	0.83	7490	tags=46%, list=14%, signal=53%
GO_REGULATION_OF_SPINDLE_ASSEMBLY	GO_REGULATION_OF_SPINDLE_ASSEMBLY		24	0.610246	1.72935	0.0102881	0.0812686	0.831	2453	tags=42%, list=4%, signal=44%
GO_CERAMIDE_METABOLIC_PROCESS	GO_CERAMIDE_METABOLIC_PROCESS		97	0.466915	1.72918	0.00627615	0.0811378	0.832	6925	tags=39%, list=13%, signal=45%
GO_NEGATIVE_REGULATION_OF_CHROMATIN_ORGANIZATION	GO_NEGATIVE_REGULATION_OF_CHROMATIN_ORGANIZATION		52	0.567695	1.72899	0.0167715	0.0809964	0.832	5835	tags=42%, list=11%, signal=47%
GO_HISTONE_H3_K9_TRIMETHYLATION	GO_HISTONE_H3_K9_TRIMETHYLATION		16	0.701209	1.72886	0.00816326	0.080805	0.832	3438	tags=56%, list=6%, signal=60%
GO_REGULATION_OF_CYTOKINESIS	GO_REGULATION_OF_CYTOKINESIS		90	0.551168	1.7284	0.00873363	0.0808645	0.832	5753	tags=40%, list=10%, signal=45%
GO_POSITIVE_REGULATION_OF_PEPTIDYL_THREONINE_PHOSPHORYLATION	GO_POSITIVE_REGULATION_OF_PEPTIDYL_THREONINE_PHOSPHORYLATION		30	0.570574	1.72838	0.0127389	0.0805965	0.832	3143	tags=37%, list=6%, signal=39%
GO_REGULATION_OF_RUFFLE_ASSEMBLY	GO_REGULATION_OF_RUFFLE_ASSEMBLY		30	0.559959	1.72828	0.00806452	0.0803866	0.832	4607	tags=40%, list=8%, signal=44%
GO_EPITHELIAL_TUBE_BRANCHING_INVOLVED_IN_LUNG_MORPHOGENESIS	GO_EPITHELIAL_TUBE_BRANCHING_INVOLVED_IN_LUNG_MORPHOGENESIS		29	0.605215	1.72768	0.00814664	0.0806156	0.833	7193	tags=45%, list=13%, signal=52%
GO_3_UTR_MEDIATED_MRNA_STABILIZATION	GO_3_UTR_MEDIATED_MRNA_STABILIZATION		23	0.608318	1.72662	0.0177515	0.0810417	0.834	6653	tags=48%, list=12%, signal=54%
GO_ESTABLISHMENT_OF_PLANAR_POLARITY_INVOLVED_IN_NEURAL_TUBE_CLOSURE	GO_ESTABLISHMENT_OF_PLANAR_POLARITY_INVOLVED_IN_NEURAL_TUBE_CLOSURE		15	0.684075	1.72659	0.00798403	0.080807	0.834	9232	tags=73%, list=17%, signal=88%
GO_POSITIVE_REGULATION_OF_PROTEIN_EXPORT_FROM_NUCLEUS	GO_POSITIVE_REGULATION_OF_PROTEIN_EXPORT_FROM_NUCLEUS		21	0.578155	1.72616	0.00808081	0.0807922	0.834	7756	tags=57%, list=14%, signal=66%
GO_REGULATION_OF_NUCLEOCYTOPLASMIC_TRANSPORT	GO_REGULATION_OF_NUCLEOCYTOPLASMIC_TRANSPORT		112	0.514028	1.726	0.0104167	0.0806464	0.834	7756	tags=51%, list=14%, signal=59%
GO_POSITIVE_REGULATION_OF_FIBROBLAST_PROLIFERATION	GO_POSITIVE_REGULATION_OF_FIBROBLAST_PROLIFERATION		50	0.525891	1.72537	0.010352	0.0808638	0.837	8366	tags=46%, list=15%, signal=54%
GO_REGULATION_OF_PROTEIN_CONTAINING_COMPLEX_ASSEMBLY	GO_REGULATION_OF_PROTEIN_CONTAINING_COMPLEX_ASSEMBLY		437	0.43148	1.72476	0.00212314	0.081078	0.837	5956	tags=36%, list=11%, signal=40%
GO_POSITIVE_REGULATION_OF_CELL_CYCLE_PROCESS	GO_POSITIVE_REGULATION_OF_CELL_CYCLE_PROCESS		297	0.474375	1.72449	0.00835073	0.0809978	0.837	5884	tags=34%, list=11%, signal=38%
GO_REGULATION_OF_AUTOPHAGY	GO_REGULATION_OF_AUTOPHAGY		344	0.461428	1.72394	0.00416667	0.0811502	0.837	6094	tags=39%, list=11%, signal=44%
GO_POSITIVE_REGULATION_OF_TELOMERE_MAINTENANCE	GO_POSITIVE_REGULATION_OF_TELOMERE_MAINTENANCE		51	0.584847	1.72362	0.0149573	0.0811023	0.837	5764	tags=43%, list=10%, signal=48%
GO_DOUBLE_STRAND_BREAK_REPAIR	GO_DOUBLE_STRAND_BREAK_REPAIR		244	0.518015	1.72201	0.012685	0.0819554	0.84	5317	tags=39%, list=10%, signal=43%
GO_SYNAPSE_ORGANIZATION	GO_SYNAPSE_ORGANIZATION		431	0.435529	1.72185	0.00803213	0.0817752	0.841	5332	tags=31%, list=10%, signal=34%
GO_MITOTIC_DNA_REPLICATION	GO_MITOTIC_DNA_REPLICATION		16	0.765165	1.72177	0.00849257	0.0815659	0.842	4637	tags=56%, list=8%, signal=61%
GO_REGULATION_OF_CELLULAR_PROTEIN_CATABOLIC_PROCESS	GO_REGULATION_OF_CELLULAR_PROTEIN_CATABOLIC_PROCESS		256	0.4527	1.72152	0.00821355	0.0814601	0.842	5480	tags=34%, list=10%, signal=37%
GO_MEMBRANE_DOCKING	GO_MEMBRANE_DOCKING		179	0.478055	1.72058	0.00416667	0.0818564	0.842	6239	tags=41%, list=11%, signal=46%
GO_POSITIVE_REGULATION_OF_CHROMOSOME_ORGANIZATION	GO_POSITIVE_REGULATION_OF_CHROMOSOME_ORGANIZATION		178	0.518276	1.72032	0.012685	0.0817997	0.843	5764	tags=38%, list=10%, signal=42%
GO_POSITIVE_REGULATION_OF_CHROMOSOME_SEGREGATION	GO_POSITIVE_REGULATION_OF_CHROMOSOME_SEGREGATION		32	0.629857	1.71988	0.0103093	0.0818886	0.843	5458	tags=44%, list=10%, signal=49%
GO_RETROGRADE_TRANSPORT_ENDOSOME_TO_PLASMA_MEMBRANE	GO_RETROGRADE_TRANSPORT_ENDOSOME_TO_PLASMA_MEMBRANE		29	0.57382	1.71913	0.0104603	0.0821203	0.844	4288	tags=41%, list=8%, signal=45%
GO_REGULATION_OF_DENDRITE_DEVELOPMENT	GO_REGULATION_OF_DENDRITE_DEVELOPMENT		155	0.486127	1.71833	0.012	0.0824098	0.847	6056	tags=39%, list=11%, signal=43%
GO_POSITIVE_REGULATION_OF_PROTEIN_CONTAINING_COMPLEX_ASSEMBLY	GO_POSITIVE_REGULATION_OF_PROTEIN_CONTAINING_COMPLEX_ASSEMBLY		255	0.446547	1.71828	0.00628931	0.0821847	0.847	5956	tags=39%, list=11%, signal=43%
GO_CYTOSOLIC_TRANSPORT	GO_CYTOSOLIC_TRANSPORT		163	0.524919	1.71807	0.0102249	0.0820731	0.847	5029	tags=42%, list=9%, signal=46%
GO_NUCLEAR_TRANSPORT	GO_NUCLEAR_TRANSPORT		356	0.48825	1.71759	0.012766	0.082168	0.848	7911	tags=47%, list=14%, signal=54%
GO_REGULATION_OF_PROTEIN_LOCALIZATION_TO_CELL_PERIPHERY	GO_REGULATION_OF_PROTEIN_LOCALIZATION_TO_CELL_PERIPHERY		121	0.449738	1.71695	0.00813008	0.0824456	0.849	6680	tags=34%, list=12%, signal=38%
GO_REGULATION_OF_DNA_METABOLIC_PROCESS	GO_REGULATION_OF_DNA_METABOLIC_PROCESS		347	0.476084	1.71629	0.0208333	0.0826812	0.85	6569	tags=38%, list=12%, signal=43%
GO_REGULATION_OF_RHO_PROTEIN_SIGNAL_TRANSDUCTION	GO_REGULATION_OF_RHO_PROTEIN_SIGNAL_TRANSDUCTION		86	0.511996	1.71627	0.015873	0.0824522	0.85	5332	tags=34%, list=10%, signal=37%
GO_LIPID_TRANSLOCATION	GO_LIPID_TRANSLOCATION		46	0.526828	1.71553	0.0197239	0.0827304	0.853	7480	tags=48%, list=14%, signal=55%
GO_HISTONE_H4_ACETYLATION	GO_HISTONE_H4_ACETYLATION		69	0.569372	1.71523	0.0160321	0.0826929	0.853	6302	tags=49%, list=11%, signal=56%
GO_RESPONSE_TO_MURAMYL_DIPEPTIDE	GO_RESPONSE_TO_MURAMYL_DIPEPTIDE		20	0.659981	1.71513	0.0146444	0.082478	0.853	3047	tags=45%, list=6%, signal=48%
GO_POSITIVE_REGULATION_OF_WNT_SIGNALING_PATHWAY	GO_POSITIVE_REGULATION_OF_WNT_SIGNALING_PATHWAY		180	0.463978	1.71498	0.0020284	0.0823465	0.854	7047	tags=38%, list=13%, signal=43%
GO_GANGLIOSIDE_METABOLIC_PROCESS	GO_GANGLIOSIDE_METABOLIC_PROCESS		22	0.57157	1.71415	0.0100604	0.0827696	0.854	3878	tags=36%, list=7%, signal=39%
GO_CELLULAR_RESPONSE_TO_AMYLOID_BETA	GO_CELLULAR_RESPONSE_TO_AMYLOID_BETA		44	0.553546	1.71405	0.0250522	0.0825853	0.854	4181	tags=34%, list=8%, signal=37%
GO_AMYLOID_PRECURSOR_PROTEIN_METABOLIC_PROCESS	GO_AMYLOID_PRECURSOR_PROTEIN_METABOLIC_PROCESS		70	0.476433	1.71397	0.00826446	0.0824059	0.854	5332	tags=40%, list=10%, signal=44%
GO_MIDBRAIN_DOPAMINERGIC_NEURON_DIFFERENTIATION	GO_MIDBRAIN_DOPAMINERGIC_NEURON_DIFFERENTIATION		17	0.634112	1.71281	0.0102041	0.0829772	0.855	4213	tags=41%, list=8%, signal=45%
GO_NEGATIVE_REGULATION_OF_ORGANELLE_ORGANIZATION	GO_NEGATIVE_REGULATION_OF_ORGANELLE_ORGANIZATION		394	0.441869	1.71223	0.00630252	0.0831531	0.856	5473	tags=34%, list=10%, signal=38%
GO_REGULATION_OF_PROTEIN_EXPORT_FROM_NUCLEUS	GO_REGULATION_OF_PROTEIN_EXPORT_FROM_NUCLEUS		41	0.530256	1.71174	0.015873	0.0832899	0.857	4036	tags=41%, list=7%, signal=45%
GO_PROTEIN_O_LINKED_GLYCOSYLATION	GO_PROTEIN_O_LINKED_GLYCOSYLATION		102	0.461612	1.71165	0.00601202	0.0830846	0.857	3095	tags=25%, list=6%, signal=27%
GO_INTEGRIN_MEDIATED_SIGNALING_PATHWAY	GO_INTEGRIN_MEDIATED_SIGNALING_PATHWAY		107	0.533389	1.71131	0.024948	0.0830628	0.858	6185	tags=38%, list=11%, signal=43%
GO_REGULATION_OF_INTRACELLULAR_STEROID_HORMONE_RECEPTOR_SIGNALING_PATHWAY	GO_REGULATION_OF_INTRACELLULAR_STEROID_HORMONE_RECEPTOR_SIGNALING_PATHWAY		75	0.524344	1.71116	0	0.0829351	0.858	6596	tags=45%, list=12%, signal=51%
GO_CILIARY_BASAL_BODY_PLASMA_MEMBRANE_DOCKING	GO_CILIARY_BASAL_BODY_PLASMA_MEMBRANE_DOCKING		94	0.550276	1.7104	0.00829876	0.0832841	0.858	6831	tags=46%, list=12%, signal=52%
GO_SPINDLE_LOCALIZATION	GO_SPINDLE_LOCALIZATION		49	0.594236	1.71003	0.0142276	0.0832908	0.858	5782	tags=49%, list=10%, signal=55%
GO_POSITIVE_REGULATION_OF_VASCULAR_ASSOCIATED_SMOOTH_MUSCLE_CELL_MIGRATION	GO_POSITIVE_REGULATION_OF_VASCULAR_ASSOCIATED_SMOOTH_MUSCLE_CELL_MIGRATION		22	0.621375	1.70987	0.0179641	0.0831272	0.859	7211	tags=50%, list=13%, signal=57%
GO_CHROMATIN_ASSEMBLY_OR_DISASSEMBLY	GO_CHROMATIN_ASSEMBLY_OR_DISASSEMBLY		146	0.532144	1.70986	0.0309278	0.0828892	0.859	5310	tags=42%, list=10%, signal=46%
GO_REGULATION_OF_ACTOMYOSIN_STRUCTURE_ORGANIZATION	GO_REGULATION_OF_ACTOMYOSIN_STRUCTURE_ORGANIZATION		98	0.485605	1.70939	0.0137795	0.0829444	0.859	5795	tags=38%, list=10%, signal=42%
GO_CEREBRAL_CORTEX_RADIALLY_ORIENTED_CELL_MIGRATION	GO_CEREBRAL_CORTEX_RADIALLY_ORIENTED_CELL_MIGRATION		30	0.592162	1.70901	0.00816326	0.0829828	0.86	5288	tags=43%, list=10%, signal=48%
GO_POSITIVE_REGULATION_OF_AXONOGENESIS	GO_POSITIVE_REGULATION_OF_AXONOGENESIS		86	0.507723	1.7088	0.0104167	0.0828632	0.86	5637	tags=41%, list=10%, signal=45%
GO_NUCLEAR_EXPORT	GO_NUCLEAR_EXPORT		203	0.519561	1.70831	0.0227273	0.0829526	0.863	5240	tags=42%, list=9%, signal=46%
GO_POSITIVE_REGULATION_OF_MRNA_SPLICING_VIA_SPLICEOSOME	GO_POSITIVE_REGULATION_OF_MRNA_SPLICING_VIA_SPLICEOSOME		23	0.623828	1.70828	0.00612245	0.082757	0.863	7555	tags=39%, list=14%, signal=45%
GO_MORPHOGENESIS_OF_EMBRYONIC_EPITHELIUM	GO_MORPHOGENESIS_OF_EMBRYONIC_EPITHELIUM		151	0.483018	1.70802	0.022541	0.082661	0.863	6134	tags=37%, list=11%, signal=42%
GO_NEGATIVE_REGULATION_OF_EPITHELIAL_CELL_DIFFERENTIATION	GO_NEGATIVE_REGULATION_OF_EPITHELIAL_CELL_DIFFERENTIATION		49	0.512561	1.70792	0.0136719	0.0824891	0.863	3338	tags=29%, list=6%, signal=30%
GO_DNA_UNWINDING_INVOLVED_IN_DNA_REPLICATION	GO_DNA_UNWINDING_INVOLVED_IN_DNA_REPLICATION		16	0.691051	1.70747	0.0181818	0.0825565	0.864	4122	tags=56%, list=7%, signal=61%
GO_POSITIVE_REGULATION_OF_INTRACELLULAR_PROTEIN_TRANSPORT	GO_POSITIVE_REGULATION_OF_INTRACELLULAR_PROTEIN_TRANSPORT		181	0.4605	1.70672	0.012959	0.0828423	0.864	5981	tags=36%, list=11%, signal=41%
GO_REGULATION_OF_PROTEIN_LOCALIZATION_TO_PLASMA_MEMBRANE	GO_REGULATION_OF_PROTEIN_LOCALIZATION_TO_PLASMA_MEMBRANE		100	0.453039	1.70643	0.0101626	0.0828091	0.864	6680	tags=33%, list=12%, signal=37%
GO_ESTABLISHMENT_OF_PROTEIN_LOCALIZATION_TO_VACUOLE	GO_ESTABLISHMENT_OF_PROTEIN_LOCALIZATION_TO_VACUOLE		52	0.543288	1.70636	0.0141129	0.0826212	0.864	4415	tags=42%, list=8%, signal=46%
GO_REGULATION_OF_RAC_PROTEIN_SIGNAL_TRANSDUCTION	GO_REGULATION_OF_RAC_PROTEIN_SIGNAL_TRANSDUCTION		17	0.634264	1.70435	0.0184426	0.0837187	0.868	5258	tags=71%, list=10%, signal=78%
GO_DNA_STRAND_ELONGATION	GO_DNA_STRAND_ELONGATION		26	0.708506	1.70412	0.0165631	0.0836401	0.868	7762	tags=69%, list=14%, signal=81%
GO_POSITIVE_REGULATION_OF_MICROTUBULE_POLYMERIZATION_OR_DEPOLYMERIZATION	GO_POSITIVE_REGULATION_OF_MICROTUBULE_POLYMERIZATION_OR_DEPOLYMERIZATION		34	0.557308	1.70269	0.0178218	0.0845395	0.872	6878	tags=44%, list=12%, signal=50%
GO_ESTABLISHMENT_OF_RNA_LOCALIZATION	GO_ESTABLISHMENT_OF_RNA_LOCALIZATION		201	0.527108	1.70247	0.0164271	0.0844649	0.872	5279	tags=39%, list=10%, signal=43%
GO_STRESS_FIBER_ASSEMBLY	GO_STRESS_FIBER_ASSEMBLY		103	0.486875	1.70233	0.0141988	0.0843653	0.872	3619	tags=31%, list=7%, signal=33%
GO_NEGATIVE_REGULATION_OF_NEURON_DIFFERENTIATION	GO_NEGATIVE_REGULATION_OF_NEURON_DIFFERENTIATION		223	0.442275	1.70185	0.00811359	0.0845245	0.872	5862	tags=34%, list=11%, signal=38%
GO_RUFFLE_ASSEMBLY	GO_RUFFLE_ASSEMBLY		43	0.514133	1.70162	0.0158103	0.0844543	0.872	4607	tags=37%, list=8%, signal=41%
GO_HISTONE_H3_K9_METHYLATION	GO_HISTONE_H3_K9_METHYLATION		37	0.616485	1.70048	0.0284553	0.0849968	0.874	4411	tags=49%, list=8%, signal=53%
GO_REGULATION_OF_PROTEIN_LOCALIZATION_TO_NUCLEUS	GO_REGULATION_OF_PROTEIN_LOCALIZATION_TO_NUCLEUS		126	0.477681	1.69947	0.0146138	0.0854506	0.874	5981	tags=39%, list=11%, signal=44%
GO_INSULIN_RECEPTOR_SIGNALING_PATHWAY	GO_INSULIN_RECEPTOR_SIGNALING_PATHWAY		143	0.453127	1.69935	0.0040568	0.0852853	0.874	6736	tags=39%, list=12%, signal=44%
GO_POSITIVE_REGULATION_OF_RESPONSE_TO_ENDOPLASMIC_RETICULUM_STRESS	GO_POSITIVE_REGULATION_OF_RESPONSE_TO_ENDOPLASMIC_RETICULUM_STRESS		37	0.563029	1.69927	0.022541	0.0850819	0.874	5003	tags=46%, list=9%, signal=50%
GO_INTERACTION_WITH_SYMBIONT	GO_INTERACTION_WITH_SYMBIONT		93	0.450186	1.69834	0.00617284	0.0855324	0.877	6044	tags=32%, list=11%, signal=36%
GO_POSITIVE_REGULATION_OF_CYTOSKELETON_ORGANIZATION	GO_POSITIVE_REGULATION_OF_CYTOSKELETON_ORGANIZATION		227	0.445705	1.69785	0.00829876	0.0857284	0.877	5729	tags=37%, list=10%, signal=41%
GO_RESPONSE_TO_FIBROBLAST_GROWTH_FACTOR	GO_RESPONSE_TO_FIBROBLAST_GROWTH_FACTOR		148	0.458184	1.69744	0.0101833	0.0858529	0.879	5452	tags=31%, list=10%, signal=34%
GO_CELL_JUNCTION_ASSEMBLY	GO_CELL_JUNCTION_ASSEMBLY		434	0.440535	1.69675	0.0101626	0.0860932	0.88	5250	tags=30%, list=9%, signal=33%
GO_POSITIVE_REGULATION_OF_LAMELLIPODIUM_ORGANIZATION	GO_POSITIVE_REGULATION_OF_LAMELLIPODIUM_ORGANIZATION		33	0.552777	1.69659	0.0145833	0.0859812	0.88	5729	tags=39%, list=10%, signal=44%
GO_POSITIVE_REGULATION_OF_ORGANELLE_ASSEMBLY	GO_POSITIVE_REGULATION_OF_ORGANELLE_ASSEMBLY		69	0.552733	1.69628	0.014862	0.0859637	0.881	5141	tags=46%, list=9%, signal=51%
GO_REGULATION_OF_NUCLEOBASE_CONTAINING_COMPOUND_TRANSPORT	GO_REGULATION_OF_NUCLEOBASE_CONTAINING_COMPOUND_TRANSPORT		19	0.761066	1.69612	0.00205761	0.0858204	0.882	6943	tags=63%, list=13%, signal=72%
GO_POSITIVE_REGULATION_OF_NEURON_DIFFERENTIATION	GO_POSITIVE_REGULATION_OF_NEURON_DIFFERENTIATION		378	0.441064	1.69604	0.00616016	0.0856483	0.882	6668	tags=35%, list=12%, signal=40%
GO_POSITIVE_REGULATION_OF_DNA_REPLICATION	GO_POSITIVE_REGULATION_OF_DNA_REPLICATION		40	0.545563	1.69602	0.01222	0.0854226	0.882	8852	tags=52%, list=16%, signal=62%
GO_MODULATION_OF_PROCESS_OF_OTHER_ORGANISM	GO_MODULATION_OF_PROCESS_OF_OTHER_ORGANISM		113	0.457581	1.69563	0.00819672	0.0854775	0.882	6044	tags=37%, list=11%, signal=42%
GO_POSITIVE_REGULATION_OF_TISSUE_REMODELING	GO_POSITIVE_REGULATION_OF_TISSUE_REMODELING		39	0.540727	1.69536	0.0145228	0.0854267	0.882	6055	tags=26%, list=11%, signal=29%
GO_TOLL_LIKE_RECEPTOR_3_SIGNALING_PATHWAY	GO_TOLL_LIKE_RECEPTOR_3_SIGNALING_PATHWAY		20	0.675806	1.69501	0.0187891	0.085418	0.883	5561	tags=40%, list=10%, signal=44%
GO_REGULATION_OF_CELLULAR_RESPONSE_TO_TRANSFORMING_GROWTH_FACTOR_BETA_STIMULUS	GO_REGULATION_OF_CELLULAR_RESPONSE_TO_TRANSFORMING_GROWTH_FACTOR_BETA_STIMULUS		127	0.465641	1.69474	0.0142857	0.0853802	0.883	6661	tags=39%, list=12%, signal=45%
GO_NEGATIVE_REGULATION_OF_DNA_METABOLIC_PROCESS	GO_NEGATIVE_REGULATION_OF_DNA_METABOLIC_PROCESS		114	0.495825	1.69463	0.0165631	0.0852584	0.883	5546	tags=38%, list=10%, signal=42%
GO_PRESYNAPTIC_ENDOCYTOSIS	GO_PRESYNAPTIC_ENDOCYTOSIS		62	0.48721	1.69367	0.0122951	0.0858346	0.884	4046	tags=31%, list=7%, signal=33%
GO_NCRNA_EXPORT_FROM_NUCLEUS	GO_NCRNA_EXPORT_FROM_NUCLEUS		37	0.683892	1.69333	0.0165289	0.0858907	0.884	4853	tags=54%, list=9%, signal=59%
GO_SERTOLI_CELL_DEVELOPMENT	GO_SERTOLI_CELL_DEVELOPMENT		15	0.592148	1.69325	0.00621118	0.0856983	0.884	2109	tags=40%, list=4%, signal=42%
GO_ACTIN_FILAMENT_BUNDLE_ORGANIZATION	GO_ACTIN_FILAMENT_BUNDLE_ORGANIZATION		157	0.460631	1.69309	0.0202429	0.0855897	0.884	3642	tags=30%, list=7%, signal=32%
GO_EPITHELIAL_TUBE_FORMATION	GO_EPITHELIAL_TUBE_FORMATION		133	0.482883	1.69294	0.0183299	0.0855025	0.884	6134	tags=39%, list=11%, signal=44%
GO_POSITIVE_REGULATION_OF_DNA_METABOLIC_PROCESS	GO_POSITIVE_REGULATION_OF_DNA_METABOLIC_PROCESS		199	0.478971	1.69268	0.0210084	0.085422	0.884	4409	tags=33%, list=8%, signal=36%
GO_POSITIVE_REGULATION_OF_PROTEOLYSIS	GO_POSITIVE_REGULATION_OF_PROTEOLYSIS		358	0.415499	1.69243	0.00814664	0.0853819	0.884	5691	tags=30%, list=10%, signal=33%
GO_ACTIN_POLYMERIZATION_OR_DEPOLYMERIZATION	GO_ACTIN_POLYMERIZATION_OR_DEPOLYMERIZATION		216	0.445625	1.69216	0.0143737	0.0853567	0.884	5956	tags=37%, list=11%, signal=41%
GO_REGULATION_OF_RECEPTOR_MEDIATED_ENDOCYTOSIS	GO_REGULATION_OF_RECEPTOR_MEDIATED_ENDOCYTOSIS		102	0.445051	1.69208	0.00803213	0.085179	0.885	7129	tags=38%, list=13%, signal=44%
GO_FOCAL_ADHESION_ASSEMBLY	GO_FOCAL_ADHESION_ASSEMBLY		83	0.53139	1.69208	0.0259481	0.0849577	0.885	8148	tags=49%, list=15%, signal=58%
GO_MITOTIC_SISTER_CHROMATID_COHESION	GO_MITOTIC_SISTER_CHROMATID_COHESION		25	0.670955	1.69186	0.00996016	0.0849038	0.885	4705	tags=52%, list=9%, signal=57%
GO_REGULATION_OF_CHROMATIN_ORGANIZATION	GO_REGULATION_OF_CHROMATIN_ORGANIZATION		181	0.501883	1.69164	0.0269151	0.0848201	0.885	5545	tags=37%, list=10%, signal=41%
GO_NEURON_PROJECTION_ARBORIZATION	GO_NEURON_PROJECTION_ARBORIZATION		26	0.56647	1.69151	0.0190114	0.0846945	0.885	6668	tags=50%, list=12%, signal=57%
GO_MAMMARY_GLAND_EPITHELIUM_DEVELOPMENT	GO_MAMMARY_GLAND_EPITHELIUM_DEVELOPMENT		71	0.484933	1.69147	0.0122951	0.0845038	0.885	5781	tags=37%, list=10%, signal=41%
GO_PROTEIN_LOCALIZATION_TO_VACUOLE	GO_PROTEIN_LOCALIZATION_TO_VACUOLE		67	0.507665	1.69134	0.014	0.0843691	0.885	4415	tags=39%, list=8%, signal=42%
GO_POSITIVE_REGULATION_OF_PROTEIN_SERINE_THREONINE_KINASE_ACTIVITY	GO_POSITIVE_REGULATION_OF_PROTEIN_SERINE_THREONINE_KINASE_ACTIVITY		341	0.437808	1.69078	0.010395	0.0845369	0.886	5433	tags=32%, list=10%, signal=36%
GO_POSITIVE_REGULATION_OF_PROTEIN_EXIT_FROM_ENDOPLASMIC_RETICULUM	GO_POSITIVE_REGULATION_OF_PROTEIN_EXIT_FROM_ENDOPLASMIC_RETICULUM		15	0.634825	1.68962	0.0122449	0.0851479	0.888	4541	tags=53%, list=8%, signal=58%
GO_REGULATION_OF_EPITHELIAL_CELL_DIFFERENTIATION	GO_REGULATION_OF_EPITHELIAL_CELL_DIFFERENTIATION		161	0.438115	1.68915	0.00596422	0.0852765	0.888	6515	tags=32%, list=12%, signal=37%
GO_REGULATION_OF_POSTTRANSCRIPTIONAL_GENE_SILENCING	GO_REGULATION_OF_POSTTRANSCRIPTIONAL_GENE_SILENCING		89	0.535623	1.68862	0.0362903	0.0853876	0.888	6688	tags=47%, list=12%, signal=54%
GO_METHIONINE_METABOLIC_PROCESS	GO_METHIONINE_METABOLIC_PROCESS		16	0.642919	1.68828	0.0148305	0.0854056	0.888	6491	tags=50%, list=12%, signal=57%
GO_CIRCADIAN_REGULATION_OF_GENE_EXPRESSION	GO_CIRCADIAN_REGULATION_OF_GENE_EXPRESSION		66	0.50884	1.68818	0.0275049	0.0852448	0.888	4448	tags=41%, list=8%, signal=44%
GO_SPINDLE_ASSEMBLY	GO_SPINDLE_ASSEMBLY		114	0.531177	1.68816	0.0169851	0.0850528	0.888	7948	tags=47%, list=14%, signal=55%
GO_MAINTENANCE_OF_BLOOD_BRAIN_BARRIER	GO_MAINTENANCE_OF_BLOOD_BRAIN_BARRIER		34	0.552483	1.68807	0.0175097	0.0848943	0.888	3200	tags=38%, list=6%, signal=41%
GO_REGULATION_OF_TELOMERASE_ACTIVITY	GO_REGULATION_OF_TELOMERASE_ACTIVITY		48	0.552722	1.68777	0.0206186	0.0848561	0.888	5764	tags=44%, list=10%, signal=49%
GO_PROTEIN_POLYMERIZATION	GO_PROTEIN_POLYMERIZATION		295	0.42194	1.68746	0.00618557	0.0848704	0.888	5956	tags=34%, list=11%, signal=38%
GO_REGULATION_OF_CAMP_DEPENDENT_PROTEIN_KINASE_ACTIVITY	GO_REGULATION_OF_CAMP_DEPENDENT_PROTEIN_KINASE_ACTIVITY		20	0.543427	1.68729	0.0103093	0.0847882	0.888	1447	tags=20%, list=3%, signal=21%
GO_RESPONSE_TO_UV	GO_RESPONSE_TO_UV		138	0.478398	1.68697	0.0146751	0.0847864	0.889	5135	tags=37%, list=9%, signal=41%
GO_REGULATION_OF_INTRACELLULAR_ESTROGEN_RECEPTOR_SIGNALING_PATHWAY	GO_REGULATION_OF_INTRACELLULAR_ESTROGEN_RECEPTOR_SIGNALING_PATHWAY		39	0.555384	1.68697	0.0106838	0.084576	0.889	5701	tags=46%, list=10%, signal=51%
GO_POSITIVE_REGULATION_OF_PEPTIDYL_SERINE_PHOSPHORYLATION	GO_POSITIVE_REGULATION_OF_PEPTIDYL_SERINE_PHOSPHORYLATION		109	0.432231	1.68695	0.00425532	0.0843775	0.889	7710	tags=37%, list=14%, signal=43%
GO_ACTIVATION_OF_JUN_KINASE_ACTIVITY	GO_ACTIVATION_OF_JUN_KINASE_ACTIVITY		40	0.544136	1.68677	0.0120724	0.0843068	0.889	6859	tags=45%, list=12%, signal=51%
GO_REGULATION_OF_LONG_TERM_SYNAPTIC_POTENTIATION	GO_REGULATION_OF_LONG_TERM_SYNAPTIC_POTENTIATION		48	0.511166	1.68575	0.0165975	0.0848057	0.891	4071	tags=33%, list=7%, signal=36%
GO_CELLULAR_RESPONSE_TO_RADIATION	GO_CELLULAR_RESPONSE_TO_RADIATION		185	0.440157	1.68408	0.010661	0.0858222	0.893	4062	tags=31%, list=7%, signal=33%
GO_RHO_PROTEIN_SIGNAL_TRANSDUCTION	GO_RHO_PROTEIN_SIGNAL_TRANSDUCTION		140	0.481461	1.68364	0.0218688	0.0859117	0.894	6134	tags=38%, list=11%, signal=42%
GO_CELL_SUBSTRATE_JUNCTION_ORGANIZATION	GO_CELL_SUBSTRATE_JUNCTION_ORGANIZATION		102	0.535891	1.68323	0.0264766	0.0859809	0.894	3720	tags=35%, list=7%, signal=38%
GO_TISSUE_REGENERATION	GO_TISSUE_REGENERATION		76	0.464319	1.68226	0.011976	0.0864548	0.896	5691	tags=29%, list=10%, signal=32%
GO_REGULATION_OF_MACROAUTOPHAGY	GO_REGULATION_OF_MACROAUTOPHAGY		174	0.487719	1.68192	0.00831601	0.086467	0.896	5487	tags=41%, list=10%, signal=45%
GO_PORE_COMPLEX_ASSEMBLY	GO_PORE_COMPLEX_ASSEMBLY		20	0.637259	1.68189	0.0262626	0.08628	0.896	2621	tags=50%, list=5%, signal=52%
GO_POSITIVE_REGULATION_OF_PATTERN_RECOGNITION_RECEPTOR_SIGNALING_PATHWAY	GO_POSITIVE_REGULATION_OF_PATTERN_RECOGNITION_RECEPTOR_SIGNALING_PATHWAY		37	0.585169	1.6812	0.0153846	0.0865809	0.896	5561	tags=38%, list=10%, signal=42%
GO_PROTEIN_LOCALIZATION_TO_MICROTUBULE_ORGANIZING_CENTER	GO_PROTEIN_LOCALIZATION_TO_MICROTUBULE_ORGANIZING_CENTER		33	0.619287	1.68089	0.0265849	0.0866112	0.896	6750	tags=58%, list=12%, signal=66%
GO_REGULATION_OF_DNA_TEMPLATED_TRANSCRIPTION_INITIATION	GO_REGULATION_OF_DNA_TEMPLATED_TRANSCRIPTION_INITIATION		46	0.54026	1.68085	0.0100806	0.0864369	0.896	6431	tags=48%, list=12%, signal=54%
GO_REGULATION_OF_ENDOCYTOSIS	GO_REGULATION_OF_ENDOCYTOSIS		207	0.424727	1.68031	0.010101	0.086631	0.898	7129	tags=38%, list=13%, signal=43%
GO_REGULATION_OF_SYNAPTIC_VESICLE_ENDOCYTOSIS	GO_REGULATION_OF_SYNAPTIC_VESICLE_ENDOCYTOSIS		17	0.612061	1.68018	0.0123967	0.0865253	0.899	3737	tags=41%, list=7%, signal=44%
GO_NEGATIVE_REGULATION_OF_CELL_DEVELOPMENT	GO_NEGATIVE_REGULATION_OF_CELL_DEVELOPMENT		335	0.423836	1.68015	0.00831601	0.0863435	0.899	5862	tags=32%, list=11%, signal=36%
GO_PLASMA_MEMBRANE_TUBULATION	GO_PLASMA_MEMBRANE_TUBULATION		19	0.586714	1.67997	0.020202	0.0862875	0.899	8148	tags=58%, list=15%, signal=68%
GO_HISTONE_H3_K4_METHYLATION	GO_HISTONE_H3_K4_METHYLATION		53	0.592314	1.67967	0.0204918	0.0863154	0.899	6474	tags=45%, list=12%, signal=51%
GO_REGULATION_OF_CHROMATIN_ASSEMBLY	GO_REGULATION_OF_CHROMATIN_ASSEMBLY		19	0.661505	1.67912	0.0307692	0.0865104	0.899	3467	tags=53%, list=6%, signal=56%
GO_REGULATION_OF_WNT_SIGNALING_PATHWAY	GO_REGULATION_OF_WNT_SIGNALING_PATHWAY		367	0.434145	1.67881	0.00612245	0.0865197	0.899	6158	tags=33%, list=11%, signal=37%
GO_POSITIVE_REGULATION_OF_REACTIVE_OXYGEN_SPECIES_BIOSYNTHETIC_PROCESS	GO_POSITIVE_REGULATION_OF_REACTIVE_OXYGEN_SPECIES_BIOSYNTHETIC_PROCESS		58	0.47568	1.67877	0.0119048	0.0863534	0.899	7723	tags=36%, list=14%, signal=42%
GO_PEPTIDYL_LYSINE_ACETYLATION	GO_PEPTIDYL_LYSINE_ACETYLATION		171	0.503475	1.6787	0.026971	0.0861887	0.899	7264	tags=46%, list=13%, signal=52%
GO_ORGANISM_EMERGENCE_FROM_PROTECTIVE_STRUCTURE	GO_ORGANISM_EMERGENCE_FROM_PROTECTIVE_STRUCTURE		29	0.534666	1.67867	0.0124481	0.0860107	0.899	7000	tags=59%, list=13%, signal=67%
GO_REGULATION_OF_AXON_GUIDANCE	GO_REGULATION_OF_AXON_GUIDANCE		44	0.541964	1.67708	0.0161616	0.0869926	0.903	5637	tags=43%, list=10%, signal=48%
GO_SUBSTRATE_DEPENDENT_CELL_MIGRATION	GO_SUBSTRATE_DEPENDENT_CELL_MIGRATION		28	0.595198	1.67629	0.0205761	0.0873867	0.904	4975	tags=43%, list=9%, signal=47%
GO_PROTEIN_ACETYLATION	GO_PROTEIN_ACETYLATION		201	0.491656	1.67616	0.0250522	0.0872788	0.904	7264	tags=45%, list=13%, signal=51%
GO_NEGATIVE_REGULATION_OF_EPITHELIAL_TO_MESENCHYMAL_TRANSITION	GO_NEGATIVE_REGULATION_OF_EPITHELIAL_TO_MESENCHYMAL_TRANSITION		37	0.511519	1.67609	0.0163934	0.0871227	0.904	6829	tags=41%, list=12%, signal=46%
GO_TUBE_FORMATION	GO_TUBE_FORMATION		150	0.468814	1.67607	0.0224949	0.0869336	0.904	5062	tags=35%, list=9%, signal=38%
GO_NEGATIVE_REGULATION_OF_CELLULAR_AMIDE_METABOLIC_PROCESS	GO_NEGATIVE_REGULATION_OF_CELLULAR_AMIDE_METABOLIC_PROCESS		216	0.428723	1.67605	0.0178218	0.0867459	0.904	5921	tags=31%, list=11%, signal=34%
GO_HISTONE_METHYLATION	GO_HISTONE_METHYLATION		137	0.53642	1.67595	0.0383065	0.0866034	0.904	6585	tags=42%, list=12%, signal=48%
GO_DNA_REPLICATION	GO_DNA_REPLICATION		272	0.503826	1.67595	0.0310559	0.0864071	0.904	8074	tags=45%, list=15%, signal=52%
GO_CELL_CYCLE_DNA_REPLICATION	GO_CELL_CYCLE_DNA_REPLICATION		65	0.610382	1.67494	0.0313808	0.0869154	0.906	8867	tags=57%, list=16%, signal=68%
GO_CYTOPLASMIC_MICROTUBULE_ORGANIZATION	GO_CYTOPLASMIC_MICROTUBULE_ORGANIZATION		63	0.531227	1.67455	0.0162933	0.086962	0.906	6107	tags=49%, list=11%, signal=55%
GO_GOLGI_TO_PLASMA_MEMBRANE_TRANSPORT	GO_GOLGI_TO_PLASMA_MEMBRANE_TRANSPORT		60	0.54106	1.67432	0.014433	0.0869621	0.906	5624	tags=45%, list=10%, signal=50%
GO_REGULATION_OF_MRNA_3_END_PROCESSING	GO_REGULATION_OF_MRNA_3_END_PROCESSING		28	0.63626	1.67421	0.0204918	0.0868409	0.906	5156	tags=57%, list=9%, signal=63%
GO_PROTEIN_LOCALIZATION_TO_CYTOSKELETON	GO_PROTEIN_LOCALIZATION_TO_CYTOSKELETON		57	0.555713	1.67352	0.0165631	0.0871527	0.906	7191	tags=51%, list=13%, signal=58%
GO_REGULATION_OF_NEURON_MIGRATION	GO_REGULATION_OF_NEURON_MIGRATION		45	0.538737	1.67283	0.012024	0.0875155	0.906	5685	tags=36%, list=10%, signal=40%
GO_COVALENT_CHROMATIN_MODIFICATION	GO_COVALENT_CHROMATIN_MODIFICATION		471	0.496357	1.67249	0.0330578	0.087543	0.907	7285	tags=43%, list=13%, signal=49%
GO_G2_DNA_DAMAGE_CHECKPOINT	GO_G2_DNA_DAMAGE_CHECKPOINT		35	0.570922	1.67191	0.0224033	0.0878301	0.908	6030	tags=43%, list=11%, signal=48%
GO_POSITIVE_REGULATION_OF_CYCLIN_DEPENDENT_PROTEIN_KINASE_ACTIVITY	GO_POSITIVE_REGULATION_OF_CYCLIN_DEPENDENT_PROTEIN_KINASE_ACTIVITY		35	0.544271	1.67119	0.0205761	0.0881407	0.908	5277	tags=43%, list=10%, signal=47%
GO_NEGATIVE_REGULATION_OF_AUTOPHAGY	GO_NEGATIVE_REGULATION_OF_AUTOPHAGY		84	0.483853	1.67008	0.0263692	0.0887804	0.911	6094	tags=38%, list=11%, signal=43%
GO_NEGATIVE_REGULATION_OF_UBIQUITIN_DEPENDENT_PROTEIN_CATABOLIC_PROCESS	GO_NEGATIVE_REGULATION_OF_UBIQUITIN_DEPENDENT_PROTEIN_CATABOLIC_PROCESS		48	0.517732	1.6696	0.022449	0.0889269	0.911	4739	tags=42%, list=9%, signal=46%
GO_PROTEIN_KINASE_B_SIGNALING	GO_PROTEIN_KINASE_B_SIGNALING		267	0.424723	1.6693	0.00852879	0.0889069	0.911	5487	tags=27%, list=10%, signal=30%
GO_EXTRINSIC_APOPTOTIC_SIGNALING_PATHWAY	GO_EXTRINSIC_APOPTOTIC_SIGNALING_PATHWAY		228	0.436276	1.66884	0.0164609	0.0890492	0.911	6000	tags=32%, list=11%, signal=35%
GO_REGULATION_OF_DNA_BIOSYNTHETIC_PROCESS	GO_REGULATION_OF_DNA_BIOSYNTHETIC_PROCESS		108	0.501624	1.66869	0.021692	0.0889771	0.911	5365	tags=36%, list=10%, signal=40%
GO_POSITIVE_REGULATION_OF_CELLULAR_RESPONSE_TO_TRANSFORMING_GROWTH_FACTOR_BETA_STIMULUS	GO_POSITIVE_REGULATION_OF_CELLULAR_RESPONSE_TO_TRANSFORMING_GROWTH_FACTOR_BETA_STIMULUS		30	0.535913	1.66857	0.0181087	0.0888583	0.911	6044	tags=50%, list=11%, signal=56%
GO_POSITIVE_REGULATION_OF_ACTIN_FILAMENT_POLYMERIZATION	GO_POSITIVE_REGULATION_OF_ACTIN_FILAMENT_POLYMERIZATION		100	0.470301	1.66785	0.0147059	0.0891539	0.912	5956	tags=44%, list=11%, signal=49%
GO_LYTIC_VACUOLE_ORGANIZATION	GO_LYTIC_VACUOLE_ORGANIZATION		66	0.496734	1.66778	0.0214592	0.0890213	0.912	5487	tags=41%, list=10%, signal=45%
GO_PROTEIN_DEPOLYMERIZATION	GO_PROTEIN_DEPOLYMERIZATION		113	0.468069	1.66688	0.0179641	0.0894426	0.914	5734	tags=35%, list=10%, signal=38%
GO_DNA_PACKAGING	GO_DNA_PACKAGING		166	0.500965	1.6668	0.0372671	0.0893046	0.914	5354	tags=39%, list=10%, signal=43%
GO_VIRAL_LIFE_CYCLE	GO_VIRAL_LIFE_CYCLE		337	0.458381	1.66634	0.0210526	0.0894761	0.915	5380	tags=34%, list=10%, signal=37%
GO_PHOSPHATIDYLINOSITOL_DEPHOSPHORYLATION	GO_PHOSPHATIDYLINOSITOL_DEPHOSPHORYLATION		31	0.610706	1.66586	0.0180723	0.0896293	0.915	6829	tags=55%, list=12%, signal=63%
GO_REGULATION_OF_ACTIN_FILAMENT_BUNDLE_ASSEMBLY	GO_REGULATION_OF_ACTIN_FILAMENT_BUNDLE_ASSEMBLY		101	0.469767	1.66584	0.0252918	0.0894533	0.915	3619	tags=31%, list=7%, signal=33%
GO_REGULATION_OF_CHROMATIN_ASSEMBLY_OR_DISASSEMBLY	GO_REGULATION_OF_CHROMATIN_ASSEMBLY_OR_DISASSEMBLY		24	0.620294	1.66583	0.0313725	0.0892589	0.915	5097	tags=50%, list=9%, signal=55%
GO_REGULATION_OF_ORGANELLE_ASSEMBLY	GO_REGULATION_OF_ORGANELLE_ASSEMBLY		189	0.467483	1.66538	0.00424628	0.0893926	0.915	5274	tags=38%, list=10%, signal=42%
GO_LIPOPROTEIN_CATABOLIC_PROCESS	GO_LIPOPROTEIN_CATABOLIC_PROCESS		15	0.600354	1.6651	0.010101	0.0893282	0.915	5332	tags=40%, list=10%, signal=44%
GO_CYTOKINESIS	GO_CYTOKINESIS		159	0.483802	1.66506	0.0190275	0.0891554	0.915	5753	tags=37%, list=10%, signal=41%
GO_PEPTIDYL_LYSINE_TRIMETHYLATION	GO_PEPTIDYL_LYSINE_TRIMETHYLATION		48	0.618232	1.6644	0.028	0.0894433	0.917	6585	tags=50%, list=12%, signal=57%
GO_MITOTIC_RECOMBINATION	GO_MITOTIC_RECOMBINATION		22	0.607381	1.66344	0.0266393	0.0899965	0.917	6437	tags=59%, list=12%, signal=67%
GO_INTERACTION_WITH_HOST	GO_INTERACTION_WITH_HOST		212	0.458754	1.66332	0.0226337	0.089884	0.917	7331	tags=39%, list=13%, signal=44%
GO_POLARIZED_EPITHELIAL_CELL_DIFFERENTIATION	GO_POLARIZED_EPITHELIAL_CELL_DIFFERENTIATION		22	0.564285	1.66299	0.0195312	0.0898906	0.918	5083	tags=50%, list=9%, signal=55%
GO_INTESTINAL_EPITHELIAL_CELL_DIFFERENTIATION	GO_INTESTINAL_EPITHELIAL_CELL_DIFFERENTIATION		23	0.598016	1.6629	0.0108932	0.0897509	0.918	1231	tags=26%, list=2%, signal=27%
GO_MICROTUBULE_ORGANIZING_CENTER_LOCALIZATION	GO_MICROTUBULE_ORGANIZING_CENTER_LOCALIZATION		31	0.637838	1.66281	0.0390947	0.089635	0.918	5956	tags=52%, list=11%, signal=58%
GO_POSITIVE_REGULATION_OF_NITRIC_OXIDE_METABOLIC_PROCESS	GO_POSITIVE_REGULATION_OF_NITRIC_OXIDE_METABOLIC_PROCESS		46	0.52346	1.66246	0.0305499	0.0896969	0.918	7723	tags=37%, list=14%, signal=43%
GO_PEPTIDYL_TYROSINE_MODIFICATION	GO_PEPTIDYL_TYROSINE_MODIFICATION		372	0.434263	1.66166	0.0147992	0.0900384	0.918	6534	tags=32%, list=12%, signal=36%
GO_NLS_BEARING_PROTEIN_IMPORT_INTO_NUCLEUS	GO_NLS_BEARING_PROTEIN_IMPORT_INTO_NUCLEUS		20	0.659342	1.66141	0.0218254	0.0899948	0.918	9719	tags=65%, list=18%, signal=79%
GO_MOVEMENT_IN_HOST_ENVIRONMENT	GO_MOVEMENT_IN_HOST_ENVIRONMENT		169	0.476071	1.66119	0.0230608	0.0899536	0.919	7331	tags=38%, list=13%, signal=44%
GO_GLIAL_CELL_MIGRATION	GO_GLIAL_CELL_MIGRATION		54	0.517307	1.65983	0.0250522	0.0907194	0.921	5781	tags=43%, list=10%, signal=48%
GO_POSITIVE_REGULATION_OF_GLYCOPROTEIN_BIOSYNTHETIC_PROCESS	GO_POSITIVE_REGULATION_OF_GLYCOPROTEIN_BIOSYNTHETIC_PROCESS		22	0.591112	1.65978	0.0102459	0.0905626	0.921	5201	tags=50%, list=9%, signal=55%
GO_POSTSYNAPTIC_MODULATION_OF_CHEMICAL_SYNAPTIC_TRANSMISSION	GO_POSTSYNAPTIC_MODULATION_OF_CHEMICAL_SYNAPTIC_TRANSMISSION		16	0.627402	1.6596	0.0200803	0.0905528	0.922	8811	tags=50%, list=16%, signal=59%
GO_ESTABLISHMENT_OF_ORGANELLE_LOCALIZATION	GO_ESTABLISHMENT_OF_ORGANELLE_LOCALIZATION		429	0.447197	1.65951	0.0189076	0.0904256	0.922	5326	tags=34%, list=10%, signal=37%
GO_NEGATIVE_REGULATION_OF_CELLULAR_CATABOLIC_PROCESS	GO_NEGATIVE_REGULATION_OF_CELLULAR_CATABOLIC_PROCESS		259	0.437917	1.65951	0.01875	0.0902382	0.922	6695	tags=36%, list=12%, signal=41%
GO_N_ACETYLGLUCOSAMINE_METABOLIC_PROCESS	GO_N_ACETYLGLUCOSAMINE_METABOLIC_PROCESS		19	0.548316	1.65878	0.0199601	0.0907163	0.922	4996	tags=37%, list=9%, signal=40%
GO_BLASTOCYST_GROWTH	GO_BLASTOCYST_GROWTH		20	0.663932	1.65838	0.02537	0.0908307	0.922	4023	tags=45%, list=7%, signal=49%
GO_MITOPHAGY	GO_MITOPHAGY		25	0.606924	1.65776	0.0301205	0.0910763	0.922	3943	tags=48%, list=7%, signal=52%
GO_REGULATION_OF_CELLULAR_RESPONSE_TO_INSULIN_STIMULUS	GO_REGULATION_OF_CELLULAR_RESPONSE_TO_INSULIN_STIMULUS		75	0.459337	1.65766	0.0105042	0.0909616	0.922	6596	tags=39%, list=12%, signal=44%
GO_LONG_TERM_SYNAPTIC_POTENTIATION	GO_LONG_TERM_SYNAPTIC_POTENTIATION		87	0.46077	1.65743	0.0101833	0.0909246	0.922	3488	tags=28%, list=6%, signal=29%
GO_NEGATIVE_REGULATION_OF_EXOCYTOSIS	GO_NEGATIVE_REGULATION_OF_EXOCYTOSIS		33	0.571009	1.65669	0.0321199	0.091243	0.922	3729	tags=36%, list=7%, signal=39%
GO_POSITIVE_REGULATION_OF_GTPASE_ACTIVITY	GO_POSITIVE_REGULATION_OF_GTPASE_ACTIVITY		399	0.444668	1.65578	0.0264766	0.0917206	0.925	6081	tags=36%, list=11%, signal=40%
GO_NEUROTRANSMITTER_RECEPTOR_TRANSPORT	GO_NEUROTRANSMITTER_RECEPTOR_TRANSPORT		47	0.503777	1.65551	0.00616016	0.0916755	0.925	4312	tags=30%, list=8%, signal=32%
GO_POSITIVE_REGULATION_OF_PEPTIDYL_TYROSINE_PHOSPHORYLATION	GO_POSITIVE_REGULATION_OF_PEPTIDYL_TYROSINE_PHOSPHORYLATION		192	0.449881	1.65502	0.0212766	0.0917882	0.925	3575	tags=23%, list=6%, signal=25%
GO_NEGATIVE_REGULATION_OF_TELOMERE_MAINTENANCE_VIA_TELOMERE_LENGTHENING	GO_NEGATIVE_REGULATION_OF_TELOMERE_MAINTENANCE_VIA_TELOMERE_LENGTHENING		27	0.617363	1.655	0.0309278	0.0916078	0.925	6437	tags=56%, list=12%, signal=63%
GO_REGULATION_OF_MEMBRANE_PROTEIN_ECTODOMAIN_PROTEOLYSIS	GO_REGULATION_OF_MEMBRANE_PROTEIN_ECTODOMAIN_PROTEOLYSIS		23	0.594738	1.65469	0.0187891	0.0916238	0.925	7773	tags=52%, list=14%, signal=61%
GO_RESPONSE_TO_EPIDERMAL_GROWTH_FACTOR	GO_RESPONSE_TO_EPIDERMAL_GROWTH_FACTOR		46	0.542704	1.65398	0.030426	0.0918898	0.927	4122	tags=43%, list=7%, signal=47%
GO_AMYLOID_BETA_CLEARANCE	GO_AMYLOID_BETA_CLEARANCE		35	0.554273	1.65392	0.0209644	0.0917411	0.927	6125	tags=46%, list=11%, signal=51%
GO_FIBROBLAST_PROLIFERATION	GO_FIBROBLAST_PROLIFERATION		83	0.452633	1.65361	0.0149254	0.0917536	0.927	4866	tags=31%, list=9%, signal=34%
GO_T_HELPER_1_CELL_DIFFERENTIATION	GO_T_HELPER_1_CELL_DIFFERENTIATION		19	0.662108	1.65361	0.0329897	0.0915721	0.927	2560	tags=37%, list=5%, signal=39%
GO_ENDOSOMAL_TRANSPORT	GO_ENDOSOMAL_TRANSPORT		241	0.472229	1.65352	0.0271967	0.0914402	0.927	5663	tags=41%, list=10%, signal=45%
GO_REGULATION_OF_EPIDERMIS_DEVELOPMENT	GO_REGULATION_OF_EPIDERMIS_DEVELOPMENT		87	0.469995	1.65345	0.0222222	0.0913055	0.927	5405	tags=36%, list=10%, signal=39%
GO_REGULATION_OF_DNA_DAMAGE_CHECKPOINT	GO_REGULATION_OF_DNA_DAMAGE_CHECKPOINT		16	0.657839	1.65315	0.0209205	0.0913127	0.927	4926	tags=50%, list=9%, signal=55%
GO_RNA_LOCALIZATION	GO_RNA_LOCALIZATION		234	0.509579	1.65279	0.0273109	0.09141	0.927	5279	tags=38%, list=10%, signal=42%
GO_CEREBRAL_CORTEX_DEVELOPMENT	GO_CEREBRAL_CORTEX_DEVELOPMENT		113	0.48388	1.65254	0.0309917	0.0914067	0.928	5942	tags=39%, list=11%, signal=44%
GO_HETEROTYPIC_CELL_CELL_ADHESION	GO_HETEROTYPIC_CELL_CELL_ADHESION		62	0.533782	1.65197	0.0229167	0.0915904	0.929	3874	tags=31%, list=7%, signal=33%
GO_REGULATION_OF_PROTEIN_STABILITY	GO_REGULATION_OF_PROTEIN_STABILITY		291	0.428618	1.65172	0.0274841	0.0915739	0.929	4866	tags=34%, list=9%, signal=37%
GO_RNA_EXPORT_FROM_NUCLEUS	GO_RNA_EXPORT_FROM_NUCLEUS		143	0.540164	1.65147	0.0365854	0.091573	0.93	5191	tags=42%, list=9%, signal=46%
GO_NEGATIVE_REGULATION_OF_NEURON_DEATH	GO_NEGATIVE_REGULATION_OF_NEURON_DEATH		210	0.420252	1.65104	0.0168776	0.091649	0.93	5931	tags=30%, list=11%, signal=33%
GO_PROTEIN_DNA_COMPLEX_SUBUNIT_ORGANIZATION	GO_PROTEIN_DNA_COMPLEX_SUBUNIT_ORGANIZATION		209	0.482965	1.65072	0.0427699	0.0916827	0.93	6539	tags=44%, list=12%, signal=50%
GO_REPRODUCTIVE_SYSTEM_DEVELOPMENT	GO_REPRODUCTIVE_SYSTEM_DEVELOPMENT		444	0.413779	1.65061	0.0127119	0.091563	0.93	5538	tags=30%, list=10%, signal=33%
GO_REGULATION_OF_ACTIN_NUCLEATION	GO_REGULATION_OF_ACTIN_NUCLEATION		30	0.547274	1.64985	0.0189474	0.0919131	0.93	4383	tags=47%, list=8%, signal=51%
GO_SKELETAL_MUSCLE_TISSUE_REGENERATION	GO_SKELETAL_MUSCLE_TISSUE_REGENERATION		40	0.5034	1.64918	0.0121704	0.0922377	0.931	7270	tags=38%, list=13%, signal=43%
GO_REGULATION_OF_INTRACELLULAR_PROTEIN_TRANSPORT	GO_REGULATION_OF_INTRACELLULAR_PROTEIN_TRANSPORT		262	0.440371	1.64716	0.0196078	0.0934718	0.932	5981	tags=37%, list=11%, signal=41%
GO_POSITIVE_REGULATION_OF_MUSCLE_HYPERTROPHY	GO_POSITIVE_REGULATION_OF_MUSCLE_HYPERTROPHY		34	0.523422	1.64698	0.0119284	0.0933996	0.932	7902	tags=38%, list=14%, signal=45%
GO_REGULATION_OF_PROTEIN_SUMOYLATION	GO_REGULATION_OF_PROTEIN_SUMOYLATION		26	0.56816	1.64599	0.0362173	0.0939362	0.932	5691	tags=42%, list=10%, signal=47%
GO_REGULATION_OF_CYCLIN_DEPENDENT_PROTEIN_KINASE_ACTIVITY	GO_REGULATION_OF_CYCLIN_DEPENDENT_PROTEIN_KINASE_ACTIVITY		103	0.456633	1.64597	0.0146751	0.0937643	0.932	3896	tags=30%, list=7%, signal=32%
GO_POSITIVE_REGULATION_OF_MITOTIC_SISTER_CHROMATID_SEGREGATION	GO_POSITIVE_REGULATION_OF_MITOTIC_SISTER_CHROMATID_SEGREGATION		21	0.64173	1.64588	0.0170213	0.0936387	0.932	6539	tags=52%, list=12%, signal=59%
GO_CHAPERONE_MEDIATED_AUTOPHAGY	GO_CHAPERONE_MEDIATED_AUTOPHAGY		16	0.608918	1.64579	0.0280561	0.0935204	0.932	5372	tags=44%, list=10%, signal=48%
GO_AUTOPHAGOSOME_MATURATION	GO_AUTOPHAGOSOME_MATURATION		40	0.539589	1.64507	0.0221328	0.0938414	0.932	5036	tags=40%, list=9%, signal=44%
GO_POSITIVE_REGULATION_OF_PROTEIN_AUTOPHOSPHORYLATION	GO_POSITIVE_REGULATION_OF_PROTEIN_AUTOPHOSPHORYLATION		27	0.597538	1.64481	0.0301811	0.0938714	0.932	5590	tags=44%, list=10%, signal=49%
GO_NEGATIVE_REGULATION_OF_OXIDATIVE_STRESS_INDUCED_NEURON_DEATH	GO_NEGATIVE_REGULATION_OF_OXIDATIVE_STRESS_INDUCED_NEURON_DEATH		20	0.565508	1.64453	0.00616016	0.0938622	0.932	4670	tags=40%, list=8%, signal=44%
GO_REGULATION_OF_CHROMOSOME_ORGANIZATION	GO_REGULATION_OF_CHROMOSOME_ORGANIZATION		340	0.482245	1.6444	0.0382166	0.0937925	0.932	5835	tags=37%, list=11%, signal=41%
GO_FIBROBLAST_MIGRATION	GO_FIBROBLAST_MIGRATION		44	0.531901	1.644	0.0422535	0.0939036	0.933	8345	tags=50%, list=15%, signal=59%
GO_REGULATION_OF_PROTEIN_LOCALIZATION_TO_MEMBRANE	GO_REGULATION_OF_PROTEIN_LOCALIZATION_TO_MEMBRANE		193	0.416222	1.64302	0.0162602	0.0943641	0.934	6680	tags=32%, list=12%, signal=36%
GO_PLACENTA_BLOOD_VESSEL_DEVELOPMENT	GO_PLACENTA_BLOOD_VESSEL_DEVELOPMENT		34	0.509473	1.6428	0.0201207	0.0943647	0.934	5020	tags=32%, list=9%, signal=36%
GO_NEGATIVE_REGULATION_OF_CHROMOSOME_ORGANIZATION	GO_NEGATIVE_REGULATION_OF_CHROMOSOME_ORGANIZATION		134	0.505255	1.64264	0.04375	0.0942963	0.934	5473	tags=41%, list=10%, signal=45%
GO_POSITIVE_REGULATION_OF_PROTEIN_LOCALIZATION_TO_NUCLEUS	GO_POSITIVE_REGULATION_OF_PROTEIN_LOCALIZATION_TO_NUCLEUS		80	0.488639	1.64253	0.0310559	0.0941839	0.934	5981	tags=38%, list=11%, signal=42%
GO_ACTIVATION_OF_PROTEIN_KINASE_ACTIVITY	GO_ACTIVATION_OF_PROTEIN_KINASE_ACTIVITY		328	0.42288	1.64252	0.022869	0.0940143	0.934	6178	tags=33%, list=11%, signal=37%
GO_NEURON_MIGRATION	GO_NEURON_MIGRATION		164	0.457367	1.64239	0.01222	0.0939155	0.934	5685	tags=28%, list=10%, signal=31%
GO_REGULATION_OF_PEPTIDYL_TYROSINE_PHOSPHORYLATION	GO_REGULATION_OF_PEPTIDYL_TYROSINE_PHOSPHORYLATION		258	0.432988	1.64233	0.0186335	0.0937807	0.934	3575	tags=23%, list=6%, signal=25%
GO_REGULATION_OF_PROTEASOMAL_UBIQUITIN_DEPENDENT_PROTEIN_CATABOLIC_PROCESS	GO_REGULATION_OF_PROTEASOMAL_UBIQUITIN_DEPENDENT_PROTEIN_CATABOLIC_PROCESS		130	0.452169	1.64133	0.0163934	0.0943598	0.936	5480	tags=34%, list=10%, signal=37%
GO_REGULATION_OF_MITOTIC_SPINDLE_ASSEMBLY	GO_REGULATION_OF_MITOTIC_SPINDLE_ASSEMBLY		17	0.619093	1.641	0.0285714	0.094412	0.937	4269	tags=47%, list=8%, signal=51%
GO_REGULATION_OF_MAP_KINASE_ACTIVITY	GO_REGULATION_OF_MAP_KINASE_ACTIVITY		339	0.423773	1.64076	0.0187891	0.0944385	0.937	6119	tags=34%, list=11%, signal=38%
GO_POSITIVE_REGULATION_OF_VIRAL_PROCESS	GO_POSITIVE_REGULATION_OF_VIRAL_PROCESS		107	0.465242	1.64069	0.0222222	0.0943079	0.937	6560	tags=43%, list=12%, signal=49%
GO_POSITIVE_REGULATION_OF_MAP_KINASE_ACTIVITY	GO_POSITIVE_REGULATION_OF_MAP_KINASE_ACTIVITY		261	0.431591	1.6404	0.0229645	0.0943076	0.937	6119	tags=34%, list=11%, signal=38%
GO_MEMBRANE_LIPID_BIOSYNTHETIC_PROCESS	GO_MEMBRANE_LIPID_BIOSYNTHETIC_PROCESS		143	0.4343	1.64036	0.02537	0.0941613	0.937	7029	tags=38%, list=13%, signal=44%
GO_ESTABLISHMENT_OF_MITOTIC_SPINDLE_LOCALIZATION	GO_ESTABLISHMENT_OF_MITOTIC_SPINDLE_LOCALIZATION		35	0.596107	1.63993	0.0394191	0.0942628	0.938	5782	tags=46%, list=10%, signal=51%
GO_ACTIN_CYTOSKELETON_REORGANIZATION	GO_ACTIN_CYTOSKELETON_REORGANIZATION		105	0.471248	1.6399	0.0221774	0.0941079	0.938	5648	tags=36%, list=10%, signal=40%
GO_CELLULAR_RESPONSE_TO_INSULIN_STIMULUS	GO_CELLULAR_RESPONSE_TO_INSULIN_STIMULUS		224	0.421841	1.63976	0.00627615	0.0940524	0.938	6829	tags=37%, list=12%, signal=42%
GO_POSITIVE_REGULATION_OF_CELLULAR_RESPONSE_TO_INSULIN_STIMULUS	GO_POSITIVE_REGULATION_OF_CELLULAR_RESPONSE_TO_INSULIN_STIMULUS		27	0.545203	1.63958	0.0164948	0.0940132	0.939	7211	tags=44%, list=13%, signal=51%
GO_NEGATIVE_REGULATION_OF_DEPHOSPHORYLATION	GO_NEGATIVE_REGULATION_OF_DEPHOSPHORYLATION		111	0.442236	1.63944	0.014862	0.0939511	0.939	5991	tags=37%, list=11%, signal=41%
GO_MODULATION_OF_EXCITATORY_POSTSYNAPTIC_POTENTIAL	GO_MODULATION_OF_EXCITATORY_POSTSYNAPTIC_POTENTIAL		45	0.501105	1.63942	0.0178571	0.093786	0.939	8193	tags=51%, list=15%, signal=60%
GO_TRANSFORMING_GROWTH_FACTOR_BETA_RECEPTOR_SIGNALING_PATHWAY	GO_TRANSFORMING_GROWTH_FACTOR_BETA_RECEPTOR_SIGNALING_PATHWAY		199	0.439023	1.63902	0.0306748	0.0939162	0.939	6951	tags=39%, list=13%, signal=45%
GO_ACTIVATION_OF_GTPASE_ACTIVITY	GO_ACTIVATION_OF_GTPASE_ACTIVITY		107	0.466881	1.63797	0.0331384	0.0944826	0.94	5192	tags=36%, list=9%, signal=39%
GO_REGULATION_OF_GTPASE_ACTIVITY	GO_REGULATION_OF_GTPASE_ACTIVITY		472	0.43575	1.63781	0.0265306	0.0944101	0.94	6081	tags=36%, list=11%, signal=40%
GO_CELLULAR_RESPONSE_TO_DSRNA	GO_CELLULAR_RESPONSE_TO_DSRNA		21	0.598691	1.63777	0.0273109	0.0942561	0.94	9344	tags=52%, list=17%, signal=63%
GO_RECEPTOR_METABOLIC_PROCESS	GO_RECEPTOR_METABOLIC_PROCESS		198	0.420665	1.63746	0.0165631	0.0942821	0.94	6226	tags=34%, list=11%, signal=38%
GO_SPHINGOID_METABOLIC_PROCESS	GO_SPHINGOID_METABOLIC_PROCESS		21	0.59003	1.63726	0.012474	0.0942638	0.94	6812	tags=52%, list=12%, signal=60%
GO_EXTRACELLULAR_VESICLE_BIOGENESIS	GO_EXTRACELLULAR_VESICLE_BIOGENESIS		22	0.508458	1.63621	0.0102881	0.0948416	0.94	2956	tags=36%, list=5%, signal=38%
GO_NEGATIVE_REGULATION_OF_PROTEASOMAL_UBIQUITIN_DEPENDENT_PROTEIN_CATABOLIC_PROCESS	GO_NEGATIVE_REGULATION_OF_PROTEASOMAL_UBIQUITIN_DEPENDENT_PROTEIN_CATABOLIC_PROCESS		35	0.517576	1.63587	0.0355731	0.0949092	0.941	4739	tags=43%, list=9%, signal=47%
GO_TELENCEPHALON_GLIAL_CELL_MIGRATION	GO_TELENCEPHALON_GLIAL_CELL_MIGRATION		23	0.589622	1.63539	0.0227743	0.0950447	0.941	5288	tags=48%, list=10%, signal=53%
GO_CELLULAR_RESPONSE_TO_ABIOTIC_STIMULUS	GO_CELLULAR_RESPONSE_TO_ABIOTIC_STIMULUS		326	0.417414	1.63478	0.0193133	0.0953345	0.942	4062	tags=28%, list=7%, signal=30%
GO_OVULATION	GO_OVULATION		21	0.612873	1.6345	0.0400844	0.0953509	0.942	8736	tags=52%, list=16%, signal=62%
GO_POSITIVE_REGULATION_OF_ACTIN_NUCLEATION	GO_POSITIVE_REGULATION_OF_ACTIN_NUCLEATION		16	0.62852	1.63448	0.025	0.0951874	0.942	4383	tags=56%, list=8%, signal=61%
GO_POSITIVE_REGULATION_OF_I_KAPPAB_KINASE_NF_KAPPAB_SIGNALING	GO_POSITIVE_REGULATION_OF_I_KAPPAB_KINASE_NF_KAPPAB_SIGNALING		188	0.484468	1.63406	0.026087	0.0953538	0.943	5561	tags=36%, list=10%, signal=40%
GO_NEGATIVE_REGULATION_OF_CELLULAR_COMPONENT_MOVEMENT	GO_NEGATIVE_REGULATION_OF_CELLULAR_COMPONENT_MOVEMENT		366	0.404929	1.63395	0.020284	0.0952485	0.943	5135	tags=26%, list=9%, signal=29%
GO_REGULATION_OF_DEVELOPMENTAL_GROWTH	GO_REGULATION_OF_DEVELOPMENTAL_GROWTH		347	0.417297	1.63357	0.012474	0.0952858	0.943	5876	tags=31%, list=11%, signal=35%
GO_REGULATION_OF_RNA_EXPORT_FROM_NUCLEUS	GO_REGULATION_OF_RNA_EXPORT_FROM_NUCLEUS		16	0.7596	1.63317	0.0060241	0.0952192	0.944	6943	tags=69%, list=13%, signal=79%
GO_REGULATION_OF_HISTONE_MODIFICATION	GO_REGULATION_OF_HISTONE_MODIFICATION		146	0.483123	1.63302	0.0292276	0.0951379	0.944	6474	tags=38%, list=12%, signal=43%
GO_REGULATION_OF_NON_CANONICAL_WNT_SIGNALING_PATHWAY	GO_REGULATION_OF_NON_CANONICAL_WNT_SIGNALING_PATHWAY		23	0.572169	1.63255	0.0230126	0.0952817	0.944	3847	tags=39%, list=7%, signal=42%
GO_NEGATIVE_REGULATION_OF_MORPHOGENESIS_OF_AN_EPITHELIUM	GO_NEGATIVE_REGULATION_OF_MORPHOGENESIS_OF_AN_EPITHELIUM		16	0.633137	1.63244	0.0220884	0.0951995	0.944	7708	tags=69%, list=14%, signal=80%
GO_HISTONE_UBIQUITINATION	GO_HISTONE_UBIQUITINATION		48	0.559064	1.63186	0.0207039	0.0954809	0.944	7900	tags=60%, list=14%, signal=70%
GO_REGULATION_OF_INTRACELLULAR_TRANSPORT	GO_REGULATION_OF_INTRACELLULAR_TRANSPORT		351	0.427281	1.6312	0.0192308	0.0957659	0.944	5999	tags=36%, list=11%, signal=40%
GO_NUCLEOSOME_ORGANIZATION	GO_NUCLEOSOME_ORGANIZATION		111	0.509689	1.63085	0.0349076	0.0958312	0.944	6538	tags=43%, list=12%, signal=49%
GO_COCHLEA_DEVELOPMENT	GO_COCHLEA_DEVELOPMENT		51	0.463205	1.63027	0.0104384	0.0959709	0.944	3143	tags=25%, list=6%, signal=27%
GO_MRNA_TRANSPORT	GO_MRNA_TRANSPORT		150	0.514339	1.62969	0.0306122	0.0962388	0.944	5279	tags=39%, list=10%, signal=43%
GO_POSITIVE_REGULATION_OF_ERBB_SIGNALING_PATHWAY	GO_POSITIVE_REGULATION_OF_ERBB_SIGNALING_PATHWAY		38	0.52539	1.62853	0.0107296	0.0969378	0.949	5020	tags=32%, list=9%, signal=35%
GO_HISTONE_H3_K9_MODIFICATION	GO_HISTONE_H3_K9_MODIFICATION		48	0.56901	1.62805	0.0454545	0.0971372	0.949	5274	tags=46%, list=10%, signal=51%
GO_CELL_GROWTH	GO_CELL_GROWTH		476	0.396554	1.62797	0.0162933	0.0970264	0.949	5816	tags=31%, list=11%, signal=34%
GO_ANATOMICAL_STRUCTURE_HOMEOSTASIS	GO_ANATOMICAL_STRUCTURE_HOMEOSTASIS		452	0.405725	1.62773	0.0189474	0.0970234	0.949	5791	tags=31%, list=10%, signal=34%
GO_CLATHRIN_DEPENDENT_ENDOCYTOSIS	GO_CLATHRIN_DEPENDENT_ENDOCYTOSIS		45	0.524236	1.62719	0.0394477	0.097226	0.95	7504	tags=58%, list=14%, signal=67%
GO_PEPTIDYL_TYROSINE_AUTOPHOSPHORYLATION	GO_PEPTIDYL_TYROSINE_AUTOPHOSPHORYLATION		41	0.529837	1.62633	0.0211864	0.0976481	0.95	6357	tags=41%, list=12%, signal=47%
GO_REGULATION_OF_RESPONSE_TO_INTERFERON_GAMMA	GO_REGULATION_OF_RESPONSE_TO_INTERFERON_GAMMA		25	0.582399	1.62383	0.0330578	0.0992691	0.952	4667	tags=36%, list=8%, signal=39%
GO_HEPATOCYTE_GROWTH_FACTOR_RECEPTOR_SIGNALING_PATHWAY	GO_HEPATOCYTE_GROWTH_FACTOR_RECEPTOR_SIGNALING_PATHWAY		16	0.590318	1.62333	0.0264228	0.0995004	0.952	3155	tags=25%, list=6%, signal=27%
GO_NEGATIVE_REGULATION_OF_CELLULAR_SENESCENCE	GO_NEGATIVE_REGULATION_OF_CELLULAR_SENESCENCE		22	0.587001	1.62295	0.0334029	0.0996048	0.952	4637	tags=41%, list=8%, signal=45%
GO_POSITIVE_REGULATION_OF_INTERFERON_ALPHA_PRODUCTION	GO_POSITIVE_REGULATION_OF_INTERFERON_ALPHA_PRODUCTION		20	0.671656	1.62282	0.0409836	0.099516	0.952	5672	tags=45%, list=10%, signal=50%
GO_NEGATIVE_REGULATION_OF_TELOMERE_MAINTENANCE_VIA_TELOMERASE	GO_NEGATIVE_REGULATION_OF_TELOMERE_MAINTENANCE_VIA_TELOMERASE		20	0.6372	1.6223	0.0355649	0.0997263	0.953	5365	tags=60%, list=10%, signal=66%
GO_LOCOMOTORY_BEHAVIOR	GO_LOCOMOTORY_BEHAVIOR		197	0.408363	1.62195	0.00196464	0.0998208	0.953	6829	tags=34%, list=12%, signal=38%
GO_POSITIVE_REGULATION_OF_EXTRINSIC_APOPTOTIC_SIGNALING_PATHWAY_VIA_DEATH_DOMAIN_RECEPTORS	GO_POSITIVE_REGULATION_OF_EXTRINSIC_APOPTOTIC_SIGNALING_PATHWAY_VIA_DEATH_DOMAIN_RECEPTORS		15	0.641212	1.6218	0.038	0.0997793	0.953	7832	tags=53%, list=14%, signal=62%
GO_CELLULAR_RESPONSE_TO_PEPTIDE	GO_CELLULAR_RESPONSE_TO_PEPTIDE		394	0.403799	1.6213	0.00849257	0.0999987	0.953	6596	tags=33%, list=12%, signal=37%
GO_CELL_CYCLE_CHECKPOINT	GO_CELL_CYCLE_CHECKPOINT		217	0.491966	1.62108	0.034632	0.0999623	0.953	6279	tags=37%, list=11%, signal=42%
GO_MITOTIC_DNA_INTEGRITY_CHECKPOINT	GO_MITOTIC_DNA_INTEGRITY_CHECKPOINT		107	0.511402	1.62098	0.0421053	0.0998818	0.953	8505	tags=45%, list=15%, signal=53%
GO_N_GLYCAN_PROCESSING	GO_N_GLYCAN_PROCESSING		18	0.587359	1.62013	0.0306122	0.100312	0.953	4318	tags=39%, list=8%, signal=42%
GO_REGULATION_OF_CELL_CYCLE_PHASE_TRANSITION	GO_REGULATION_OF_CELL_CYCLE_PHASE_TRANSITION		469	0.431938	1.61997	0.0272537	0.100252	0.953	6279	tags=33%, list=11%, signal=37%
GO_REGULATION_OF_CELL_MATRIX_ADHESION	GO_REGULATION_OF_CELL_MATRIX_ADHESION		120	0.47079	1.61861	0.0327198	0.101204	0.955	8126	tags=44%, list=15%, signal=52%
GO_CELLULAR_RESPONSE_TO_PEPTIDE_HORMONE_STIMULUS	GO_CELLULAR_RESPONSE_TO_PEPTIDE_HORMONE_STIMULUS		327	0.403608	1.61853	0.00616016	0.101082	0.955	6596	tags=33%, list=12%, signal=38%
GO_IMPORT_INTO_NUCLEUS	GO_IMPORT_INTO_NUCLEUS		171	0.457085	1.61745	0.0378151	0.101804	0.955	7690	tags=43%, list=14%, signal=50%
GO_PROTEIN_LOCALIZATION_TO_NUCLEUS	GO_PROTEIN_LOCALIZATION_TO_NUCLEUS		276	0.43869	1.61733	0.04	0.101704	0.955	7263	tags=40%, list=13%, signal=46%
GO_REGULATION_OF_PROTEIN_DEPOLYMERIZATION	GO_REGULATION_OF_PROTEIN_DEPOLYMERIZATION		86	0.470782	1.61731	0.0299401	0.101549	0.955	5443	tags=34%, list=10%, signal=37%
GO_RNA_POLYADENYLATION	GO_RNA_POLYADENYLATION		48	0.590803	1.61644	0.0277186	0.101993	0.955	5365	tags=54%, list=10%, signal=60%
GO_ATRIAL_SEPTUM_MORPHOGENESIS	GO_ATRIAL_SEPTUM_MORPHOGENESIS		15	0.594199	1.61641	0.0213592	0.101834	0.955	2985	tags=40%, list=5%, signal=42%
GO_VACUOLE_ORGANIZATION	GO_VACUOLE_ORGANIZATION		171	0.458889	1.61631	0.0173536	0.101756	0.955	5889	tags=39%, list=11%, signal=44%
GO_BRANCHING_INVOLVED_IN_MAMMARY_GLAND_DUCT_MORPHOGENESIS	GO_BRANCHING_INVOLVED_IN_MAMMARY_GLAND_DUCT_MORPHOGENESIS		24	0.555414	1.6162	0.0323232	0.101671	0.955	7911	tags=54%, list=14%, signal=63%
GO_RNA_DESTABILIZATION	GO_RNA_DESTABILIZATION		35	0.569903	1.61609	0.0387755	0.101578	0.955	4183	tags=40%, list=8%, signal=43%
GO_POSITIVE_REGULATION_OF_NITRIC_OXIDE_SYNTHASE_ACTIVITY	GO_POSITIVE_REGULATION_OF_NITRIC_OXIDE_SYNTHASE_ACTIVITY		22	0.556873	1.61568	0.0303644	0.101685	0.955	5975	tags=41%, list=11%, signal=46%
GO_PROTEIN_K48_LINKED_DEUBIQUITINATION	GO_PROTEIN_K48_LINKED_DEUBIQUITINATION		36	0.578273	1.615	0.0256917	0.102079	0.955	6399	tags=53%, list=12%, signal=60%
GO_GOLGI_TO_ENDOSOME_TRANSPORT	GO_GOLGI_TO_ENDOSOME_TRANSPORT		17	0.6702	1.61463	0.0334728	0.102199	0.955	3781	tags=59%, list=7%, signal=63%
GO_POSITIVE_REGULATION_OF_RESPONSE_TO_CYTOKINE_STIMULUS	GO_POSITIVE_REGULATION_OF_RESPONSE_TO_CYTOKINE_STIMULUS		57	0.544998	1.61444	0.0444915	0.102182	0.956	4761	tags=35%, list=9%, signal=38%
GO_REGULATION_OF_SYNAPTIC_VESICLE_RECYCLING	GO_REGULATION_OF_SYNAPTIC_VESICLE_RECYCLING		25	0.543616	1.61403	0.0190275	0.102325	0.957	6630	tags=52%, list=12%, signal=59%
GO_POSITIVE_REGULATION_OF_PROTEOLYSIS_INVOLVED_IN_CELLULAR_PROTEIN_CATABOLIC_PROCESS	GO_POSITIVE_REGULATION_OF_PROTEOLYSIS_INVOLVED_IN_CELLULAR_PROTEIN_CATABOLIC_PROCESS		126	0.433573	1.61321	0.0144928	0.102789	0.957	5480	tags=32%, list=10%, signal=35%
GO_RESPONSE_TO_OSMOTIC_STRESS	GO_RESPONSE_TO_OSMOTIC_STRESS		85	0.443129	1.61317	0.0242424	0.102644	0.957	5931	tags=35%, list=11%, signal=39%
GO_REGULATION_OF_TRANSCRIPTION_INITIATION_FROM_RNA_POLYMERASE_II_PROMOTER	GO_REGULATION_OF_TRANSCRIPTION_INITIATION_FROM_RNA_POLYMERASE_II_PROMOTER		37	0.531788	1.61267	0.0201207	0.102895	0.957	6431	tags=49%, list=12%, signal=55%
GO_RESPONSE_TO_INTERLEUKIN_4	GO_RESPONSE_TO_INTERLEUKIN_4		35	0.560665	1.6125	0.035865	0.102879	0.957	3797	tags=34%, list=7%, signal=37%
GO_REGULATION_OF_CELL_DIVISION	GO_REGULATION_OF_CELL_DIVISION		171	0.439409	1.61167	0.0194805	0.103377	0.958	5753	tags=31%, list=10%, signal=34%
GO_REGULATION_OF_NITRIC_OXIDE_SYNTHASE_ACTIVITY	GO_REGULATION_OF_NITRIC_OXIDE_SYNTHASE_ACTIVITY		52	0.460611	1.61026	0.0163265	0.104099	0.959	3662	tags=27%, list=7%, signal=29%
GO_MEMBRANE_LIPID_METABOLIC_PROCESS	GO_MEMBRANE_LIPID_METABOLIC_PROCESS		208	0.407024	1.60987	0.0226804	0.104206	0.96	7029	tags=36%, list=13%, signal=41%
GO_REGULATION_OF_PROTEIN_CONTAINING_COMPLEX_DISASSEMBLY	GO_REGULATION_OF_PROTEIN_CONTAINING_COMPLEX_DISASSEMBLY		119	0.469848	1.60912	0.0349794	0.1046	0.96	5480	tags=34%, list=10%, signal=37%
GO_CYTOKINETIC_PROCESS	GO_CYTOKINETIC_PROCESS		39	0.544921	1.60909	0.0268595	0.104437	0.96	5753	tags=49%, list=10%, signal=54%
GO_PEPTIDYL_SERINE_MODIFICATION	GO_PEPTIDYL_SERINE_MODIFICATION		330	0.420922	1.6083	0.0368852	0.104843	0.96	6949	tags=36%, list=13%, signal=41%
GO_AUTOPHAGOSOME_ORGANIZATION	GO_AUTOPHAGOSOME_ORGANIZATION		97	0.48813	1.60754	0.0291667	0.105314	0.96	5889	tags=41%, list=11%, signal=46%
GO_ACTOMYOSIN_STRUCTURE_ORGANIZATION	GO_ACTOMYOSIN_STRUCTURE_ORGANIZATION		195	0.469681	1.6071	0.0200803	0.105443	0.96	5795	tags=33%, list=10%, signal=37%
GO_MRNA_TRANSCRIPTION	GO_MRNA_TRANSCRIPTION		17	0.605104	1.60652	0.038835	0.105697	0.961	4475	tags=41%, list=8%, signal=45%
GO_REGENERATION	GO_REGENERATION		198	0.413937	1.60646	0.027027	0.10556	0.961	5691	tags=29%, list=10%, signal=33%
GO_REGULATION_OF_MEMBRANE_LIPID_DISTRIBUTION	GO_REGULATION_OF_MEMBRANE_LIPID_DISTRIBUTION		52	0.469045	1.60643	0.0248963	0.105407	0.961	7480	tags=44%, list=14%, signal=51%
GO_OSTEOCLAST_DEVELOPMENT	GO_OSTEOCLAST_DEVELOPMENT		18	0.609168	1.60624	0.0359408	0.105396	0.961	4504	tags=39%, list=8%, signal=42%
GO_MRNA_3_END_PROCESSING	GO_MRNA_3_END_PROCESSING		101	0.545311	1.60623	0.0271399	0.105237	0.961	8316	tags=54%, list=15%, signal=64%
GO_PLATELET_DEGRANULATION	GO_PLATELET_DEGRANULATION		128	0.434575	1.60541	0.030303	0.105666	0.961	4605	tags=27%, list=8%, signal=29%
GO_REGULATION_OF_CELL_JUNCTION_ASSEMBLY	GO_REGULATION_OF_CELL_JUNCTION_ASSEMBLY		200	0.43222	1.60512	0.0264228	0.105697	0.961	5250	tags=29%, list=9%, signal=32%
GO_TRNA_TRANSPORT	GO_TRNA_TRANSPORT		36	0.640232	1.60497	0.0454545	0.105619	0.961	6688	tags=53%, list=12%, signal=60%
GO_NEGATIVE_REGULATION_OF_VIRAL_TRANSCRIPTION	GO_NEGATIVE_REGULATION_OF_VIRAL_TRANSCRIPTION		27	0.548947	1.60462	0.0455487	0.105687	0.961	5223	tags=44%, list=9%, signal=49%
GO_WALKING_BEHAVIOR	GO_WALKING_BEHAVIOR		29	0.500778	1.60368	0.00811359	0.106055	0.961	2487	tags=24%, list=4%, signal=25%
GO_MACROAUTOPHAGY	GO_MACROAUTOPHAGY		307	0.453355	1.60366	0.0129032	0.105894	0.961	5889	tags=39%, list=11%, signal=44%
GO_PHOSPHATIDYLINOSITOL_BIOSYNTHETIC_PROCESS	GO_PHOSPHATIDYLINOSITOL_BIOSYNTHETIC_PROCESS		117	0.46589	1.60266	0.0314465	0.106512	0.961	6009	tags=36%, list=11%, signal=40%
GO_POSITIVE_REGULATION_OF_ISOTYPE_SWITCHING	GO_POSITIVE_REGULATION_OF_ISOTYPE_SWITCHING		28	0.554361	1.60251	0.0357895	0.106445	0.961	3169	tags=25%, list=6%, signal=27%
GO_ENDOSOME_ORGANIZATION	GO_ENDOSOME_ORGANIZATION		79	0.476681	1.6024	0.0268595	0.106359	0.961	5258	tags=42%, list=10%, signal=46%
GO_REGULATION_OF_RESPONSE_TO_CYTOKINE_STIMULUS	GO_REGULATION_OF_RESPONSE_TO_CYTOKINE_STIMULUS		188	0.456928	1.60239	0.0365591	0.10619	0.961	3932	tags=28%, list=7%, signal=30%
GO_POSITIVE_REGULATION_OF_TRANSCRIPTION_OF_NOTCH_RECEPTOR_TARGET	GO_POSITIVE_REGULATION_OF_TRANSCRIPTION_OF_NOTCH_RECEPTOR_TARGET		18	0.680137	1.60153	0.0437376	0.106699	0.961	7372	tags=67%, list=13%, signal=77%
GO_POSITIVE_REGULATION_OF_PROTEIN_IMPORT	GO_POSITIVE_REGULATION_OF_PROTEIN_IMPORT		42	0.50232	1.60117	0.036961	0.106786	0.961	5981	tags=40%, list=11%, signal=45%
GO_NUCLEUS_ORGANIZATION	GO_NUCLEUS_ORGANIZATION		128	0.482827	1.60062	0.0363248	0.107036	0.961	5245	tags=35%, list=9%, signal=39%
GO_CELL_MATRIX_ADHESION	GO_CELL_MATRIX_ADHESION		224	0.444248	1.59886	0.030303	0.108167	0.961	6178	tags=32%, list=11%, signal=36%
GO_AXO_DENDRITIC_TRANSPORT	GO_AXO_DENDRITIC_TRANSPORT		70	0.4877	1.5985	0.0264228	0.108273	0.962	4909	tags=37%, list=9%, signal=41%
GO_REGULATION_OF_RECEPTOR_RECYCLING	GO_REGULATION_OF_RECEPTOR_RECYCLING		23	0.553068	1.59835	0.0149254	0.108192	0.963	4322	tags=48%, list=8%, signal=52%
GO_REGULATION_OF_MICROTUBULE_POLYMERIZATION	GO_REGULATION_OF_MICROTUBULE_POLYMERIZATION		51	0.483832	1.59764	0.019685	0.108607	0.963	5245	tags=35%, list=9%, signal=39%
GO_POSITIVE_REGULATION_OF_MRNA_CATABOLIC_PROCESS	GO_POSITIVE_REGULATION_OF_MRNA_CATABOLIC_PROCESS		50	0.558244	1.59749	0.037422	0.108566	0.963	5913	tags=46%, list=11%, signal=51%
GO_INTRACELLULAR_RECEPTOR_SIGNALING_PATHWAY	GO_INTRACELLULAR_RECEPTOR_SIGNALING_PATHWAY		265	0.428092	1.59728	0.021645	0.108509	0.963	6678	tags=39%, list=12%, signal=44%
GO_REGULATION_OF_AUTOPHAGOSOME_ASSEMBLY	GO_REGULATION_OF_AUTOPHAGOSOME_ASSEMBLY		36	0.532418	1.59703	0.0210084	0.108502	0.963	5001	tags=47%, list=9%, signal=52%
GO_REGULATION_OF_CELLULAR_RESPONSE_TO_GROWTH_FACTOR_STIMULUS	GO_REGULATION_OF_CELLULAR_RESPONSE_TO_GROWTH_FACTOR_STIMULUS		297	0.412576	1.5967	0.0184805	0.108596	0.963	6178	tags=32%, list=11%, signal=35%
GO_REGULATION_OF_CENTRIOLE_REPLICATION	GO_REGULATION_OF_CENTRIOLE_REPLICATION		23	0.603436	1.59614	0.0384615	0.108869	0.963	4130	tags=43%, list=7%, signal=47%
GO_GLIAL_CELL_PROLIFERATION	GO_GLIAL_CELL_PROLIFERATION		49	0.474426	1.59491	0.0238612	0.109572	0.963	5781	tags=33%, list=10%, signal=36%
GO_REGULATION_OF_CENTROSOME_DUPLICATION	GO_REGULATION_OF_CENTROSOME_DUPLICATION		44	0.536396	1.59484	0.0349794	0.109453	0.963	4269	tags=39%, list=8%, signal=42%
GO_SYNAPTIC_VESICLE_RECYCLING	GO_SYNAPTIC_VESICLE_RECYCLING		74	0.462781	1.59429	0.025	0.109691	0.964	4046	tags=30%, list=7%, signal=32%
GO_NEURON_RECOGNITION	GO_NEURON_RECOGNITION		50	0.497172	1.59423	0.0314465	0.109558	0.964	6689	tags=44%, list=12%, signal=50%
GO_POSITIVE_REGULATION_OF_CHROMATIN_ORGANIZATION	GO_POSITIVE_REGULATION_OF_CHROMATIN_ORGANIZATION		103	0.477514	1.59409	0.0489796	0.109483	0.964	5545	tags=35%, list=10%, signal=39%
GO_VASCULAR_ASSOCIATED_SMOOTH_MUSCLE_CELL_MIGRATION	GO_VASCULAR_ASSOCIATED_SMOOTH_MUSCLE_CELL_MIGRATION		36	0.502518	1.59395	0.0382294	0.109416	0.964	7211	tags=33%, list=13%, signal=38%
GO_RECEPTOR_RECYCLING	GO_RECEPTOR_RECYCLING		34	0.495987	1.59394	0.0263158	0.109246	0.964	5258	tags=47%, list=10%, signal=52%
GO_TETRAHYDROFOLATE_METABOLIC_PROCESS	GO_TETRAHYDROFOLATE_METABOLIC_PROCESS		19	0.586316	1.59354	0.0316456	0.109398	0.964	7718	tags=53%, list=14%, signal=61%
GO_POSITIVE_REGULATION_OF_MITOTIC_NUCLEAR_DIVISION	GO_POSITIVE_REGULATION_OF_MITOTIC_NUCLEAR_DIVISION		56	0.472963	1.5932	0.0282258	0.109501	0.964	6812	tags=34%, list=12%, signal=39%
GO_NEURON_DEATH	GO_NEURON_DEATH		357	0.393574	1.593	0.0226337	0.10948	0.964	5666	tags=30%, list=10%, signal=33%
GO_POSITIVE_REGULATION_OF_BONE_RESORPTION	GO_POSITIVE_REGULATION_OF_BONE_RESORPTION		19	0.58507	1.59278	0.026971	0.109492	0.964	2819	tags=26%, list=5%, signal=28%
GO_POST_EMBRYONIC_DEVELOPMENT	GO_POST_EMBRYONIC_DEVELOPMENT		84	0.476677	1.59243	0.0329218	0.109601	0.964	5487	tags=38%, list=10%, signal=42%
GO_KERATINOCYTE_PROLIFERATION	GO_KERATINOCYTE_PROLIFERATION		49	0.50881	1.59234	0.0289256	0.109511	0.964	5863	tags=35%, list=11%, signal=39%
GO_PROTEIN_LOCALIZATION_TO_CELL_JUNCTION	GO_PROTEIN_LOCALIZATION_TO_CELL_JUNCTION		104	0.423316	1.59115	0.0159681	0.110236	0.965	6631	tags=37%, list=12%, signal=41%
GO_PEROXISOME_PROLIFERATOR_ACTIVATED_RECEPTOR_SIGNALING_PATHWAY	GO_PEROXISOME_PROLIFERATOR_ACTIVATED_RECEPTOR_SIGNALING_PATHWAY		21	0.534208	1.59114	0.0225873	0.110073	0.965	4486	tags=43%, list=8%, signal=47%
GO_POSITIVE_REGULATION_OF_MEMBRANE_PROTEIN_ECTODOMAIN_PROTEOLYSIS	GO_POSITIVE_REGULATION_OF_MEMBRANE_PROTEIN_ECTODOMAIN_PROTEOLYSIS		15	0.630142	1.59083	0.038055	0.110192	0.965	5332	tags=40%, list=10%, signal=44%
GO_REGULATION_OF_SYMBIOTIC_PROCESS	GO_REGULATION_OF_SYMBIOTIC_PROCESS		229	0.424716	1.59061	0.0207469	0.110207	0.965	6347	tags=34%, list=11%, signal=39%
GO_REGULATION_OF_METALLOPEPTIDASE_ACTIVITY	GO_REGULATION_OF_METALLOPEPTIDASE_ACTIVITY		21	0.540405	1.59054	0.0258449	0.110093	0.965	5929	tags=43%, list=11%, signal=48%
GO_PRESYNAPSE_ORGANIZATION	GO_PRESYNAPSE_ORGANIZATION		53	0.480492	1.59034	0.0243408	0.110082	0.965	5202	tags=32%, list=9%, signal=35%
GO_REGULATION_OF_CELLULAR_AMIDE_METABOLIC_PROCESS	GO_REGULATION_OF_CELLULAR_AMIDE_METABOLIC_PROCESS		484	0.402332	1.59019	0.0333333	0.110031	0.965	6350	tags=32%, list=11%, signal=36%
GO_REGULATION_OF_DNA_REPAIR	GO_REGULATION_OF_DNA_REPAIR		130	0.480669	1.59017	0.0423729	0.109879	0.965	6686	tags=41%, list=12%, signal=46%
GO_BLASTOCYST_DEVELOPMENT	GO_BLASTOCYST_DEVELOPMENT		104	0.422772	1.58976	0.0188679	0.11003	0.965	5776	tags=36%, list=10%, signal=40%
GO_POSITIVE_REGULATION_OF_PHOSPHATIDYLINOSITOL_3_KINASE_SIGNALING	GO_POSITIVE_REGULATION_OF_PHOSPHATIDYLINOSITOL_3_KINASE_SIGNALING		87	0.465173	1.58965	0.0295359	0.109944	0.965	5192	tags=29%, list=9%, signal=32%
GO_VIRAL_RELEASE_FROM_HOST_CELL	GO_VIRAL_RELEASE_FROM_HOST_CELL		34	0.532549	1.58935	0.0443975	0.110035	0.965	6141	tags=50%, list=11%, signal=56%
GO_MITOTIC_CHROMOSOME_CONDENSATION	GO_MITOTIC_CHROMOSOME_CONDENSATION		16	0.654241	1.58841	0.0318725	0.110425	0.966	5311	tags=44%, list=10%, signal=48%
GO_AGING	GO_AGING		307	0.383742	1.58782	0.0206612	0.110706	0.966	6053	tags=29%, list=11%, signal=33%
GO_DEVELOPMENT_OF_PRIMARY_SEXUAL_CHARACTERISTICS	GO_DEVELOPMENT_OF_PRIMARY_SEXUAL_CHARACTERISTICS		227	0.405723	1.58774	0.0194805	0.110578	0.966	6302	tags=30%, list=11%, signal=34%
GO_POSITIVE_REGULATION_OF_CELL_DIVISION	GO_POSITIVE_REGULATION_OF_CELL_DIVISION		87	0.437387	1.58773	0.0226804	0.110417	0.966	4475	tags=26%, list=8%, signal=29%
GO_NEGATIVE_REGULATION_OF_CATABOLIC_PROCESS	GO_NEGATIVE_REGULATION_OF_CATABOLIC_PROCESS		317	0.407997	1.58735	0.031185	0.110404	0.966	6695	tags=35%, list=12%, signal=39%
GO_HISTONE_H4_K5_ACETYLATION	GO_HISTONE_H4_K5_ACETYLATION		16	0.688252	1.58683	0.0434783	0.110625	0.966	8504	tags=75%, list=15%, signal=89%
GO_REGULATION_OF_PROTEIN_IMPORT	GO_REGULATION_OF_PROTEIN_IMPORT		62	0.478327	1.58656	0.0398323	0.11068	0.966	5981	tags=42%, list=11%, signal=47%
GO_I_KAPPAB_KINASE_NF_KAPPAB_SIGNALING	GO_I_KAPPAB_KINASE_NF_KAPPAB_SIGNALING		283	0.445974	1.5865	0.0456522	0.110548	0.966	6382	tags=35%, list=12%, signal=39%
GO_CELLULAR_RESPONSE_TO_STEROID_HORMONE_STIMULUS	GO_CELLULAR_RESPONSE_TO_STEROID_HORMONE_STIMULUS		206	0.422648	1.58631	0.0190275	0.110532	0.966	6596	tags=35%, list=12%, signal=40%
GO_PHOSPHOLIPID_BIOSYNTHETIC_PROCESS	GO_PHOSPHOLIPID_BIOSYNTHETIC_PROCESS		269	0.408335	1.5856	0.0168421	0.110908	0.966	5482	tags=29%, list=10%, signal=32%
GO_RESPONSE_TO_AMYLOID_BETA	GO_RESPONSE_TO_AMYLOID_BETA		55	0.486755	1.58535	0.0376569	0.110918	0.966	4181	tags=27%, list=8%, signal=29%
GO_EPITHELIAL_CELL_DEVELOPMENT	GO_EPITHELIAL_CELL_DEVELOPMENT		219	0.414224	1.58502	0.0339321	0.111025	0.966	4935	tags=27%, list=9%, signal=30%
GO_PROTEIN_AUTOUBIQUITINATION	GO_PROTEIN_AUTOUBIQUITINATION		71	0.482373	1.58502	0.0365112	0.110859	0.966	4189	tags=42%, list=8%, signal=46%
GO_DNA_BIOSYNTHETIC_PROCESS	GO_DNA_BIOSYNTHETIC_PROCESS		188	0.446028	1.58489	0.0405983	0.110764	0.966	5365	tags=34%, list=10%, signal=38%
GO_PATTERN_RECOGNITION_RECEPTOR_SIGNALING_PATHWAY	GO_PATTERN_RECOGNITION_RECEPTOR_SIGNALING_PATHWAY		198	0.464828	1.58452	0.0429185	0.110865	0.966	6678	tags=36%, list=12%, signal=41%
GO_GLIOGENESIS	GO_GLIOGENESIS		304	0.395612	1.58446	0.0190678	0.110742	0.966	6018	tags=30%, list=11%, signal=33%
GO_CALCIUM_INDEPENDENT_CELL_CELL_ADHESION_VIA_PLASMA_MEMBRANE_CELL_ADHESION_MOLECULES	GO_CALCIUM_INDEPENDENT_CELL_CELL_ADHESION_VIA_PLASMA_MEMBRANE_CELL_ADHESION_MOLECULES		23	0.547978	1.58418	0.0323887	0.110787	0.967	3457	tags=30%, list=6%, signal=32%
GO_CENTROSOME_DUPLICATION	GO_CENTROSOME_DUPLICATION		68	0.527851	1.58386	0.0469388	0.110887	0.967	6073	tags=44%, list=11%, signal=50%
GO_SEX_DIFFERENTIATION	GO_SEX_DIFFERENTIATION		278	0.398919	1.58304	0.0127932	0.111395	0.968	7276	tags=32%, list=13%, signal=37%
GO_REGULATION_OF_PATTERN_RECOGNITION_RECEPTOR_SIGNALING_PATHWAY	GO_REGULATION_OF_PATTERN_RECOGNITION_RECEPTOR_SIGNALING_PATHWAY		96	0.475998	1.58269	0.0417537	0.111529	0.968	6678	tags=35%, list=12%, signal=40%
GO_POSITIVE_REGULATION_BY_HOST_OF_VIRAL_TRANSCRIPTION	GO_POSITIVE_REGULATION_BY_HOST_OF_VIRAL_TRANSCRIPTION		17	0.610966	1.58247	0.0435644	0.111548	0.968	6044	tags=65%, list=11%, signal=73%
GO_RESPONSE_TO_GROWTH_HORMONE	GO_RESPONSE_TO_GROWTH_HORMONE		39	0.496613	1.58223	0.031185	0.111585	0.968	5746	tags=41%, list=10%, signal=46%
GO_POST_ANAL_TAIL_MORPHOGENESIS	GO_POST_ANAL_TAIL_MORPHOGENESIS		19	0.572674	1.58209	0.0386179	0.111509	0.968	3999	tags=32%, list=7%, signal=34%
GO_PHOSPHOLIPID_TRANSPORT	GO_PHOSPHOLIPID_TRANSPORT		89	0.423649	1.58163	0.0165975	0.111693	0.968	7480	tags=39%, list=14%, signal=45%
GO_NEGATIVE_REGULATION_OF_NERVOUS_SYSTEM_PROCESS	GO_NEGATIVE_REGULATION_OF_NERVOUS_SYSTEM_PROCESS		27	0.509486	1.58147	0.0346939	0.111642	0.968	7667	tags=52%, list=14%, signal=60%
GO_PROTEIN_ACYLATION	GO_PROTEIN_ACYLATION		246	0.450094	1.581	0.0395833	0.111841	0.968	5835	tags=37%, list=11%, signal=42%
GO_INTRACELLULAR_STEROID_HORMONE_RECEPTOR_SIGNALING_PATHWAY	GO_INTRACELLULAR_STEROID_HORMONE_RECEPTOR_SIGNALING_PATHWAY		116	0.461338	1.57916	0.0169851	0.113155	0.969	6596	tags=41%, list=12%, signal=46%
GO_TUMOR_NECROSIS_FACTOR_SECRETION	GO_TUMOR_NECROSIS_FACTOR_SECRETION		46	0.489105	1.57873	0.0344828	0.113355	0.97	3643	tags=20%, list=7%, signal=21%
GO_RESPONSE_TO_LEUKEMIA_INHIBITORY_FACTOR	GO_RESPONSE_TO_LEUKEMIA_INHIBITORY_FACTOR		97	0.467799	1.57841	0.0426829	0.113437	0.97	8085	tags=44%, list=15%, signal=52%
GO_RESPONSE_TO_INSULIN	GO_RESPONSE_TO_INSULIN		280	0.394959	1.57821	0.00833333	0.113411	0.97	6922	tags=36%, list=13%, signal=41%
GO_REGULATION_OF_FIBROBLAST_MIGRATION	GO_REGULATION_OF_FIBROBLAST_MIGRATION		33	0.532417	1.57797	0.0455487	0.113481	0.97	7365	tags=45%, list=13%, signal=52%
GO_NEGATIVE_REGULATION_OF_VIRAL_PROCESS	GO_NEGATIVE_REGULATION_OF_VIRAL_PROCESS		101	0.491762	1.577	0.0458515	0.113895	0.97	6141	tags=36%, list=11%, signal=40%
GO_ENTRY_INTO_HOST	GO_ENTRY_INTO_HOST		147	0.46369	1.57694	0.0496894	0.113775	0.97	7331	tags=36%, list=13%, signal=41%
GO_PEPTIDYL_THREONINE_DEPHOSPHORYLATION	GO_PEPTIDYL_THREONINE_DEPHOSPHORYLATION		22	0.586625	1.57694	0.0442656	0.113611	0.97	3418	tags=36%, list=6%, signal=39%
GO_REGULATION_OF_REACTIVE_OXYGEN_SPECIES_BIOSYNTHETIC_PROCESS	GO_REGULATION_OF_REACTIVE_OXYGEN_SPECIES_BIOSYNTHETIC_PROCESS		100	0.42215	1.57688	0.0346939	0.113499	0.97	4253	tags=22%, list=8%, signal=24%
GO_RUFFLE_ORGANIZATION	GO_RUFFLE_ORGANIZATION		55	0.476481	1.57637	0.0480962	0.113596	0.97	4607	tags=33%, list=8%, signal=36%
GO_POSITIVE_REGULATION_OF_POTASSIUM_ION_TRANSPORT	GO_POSITIVE_REGULATION_OF_POTASSIUM_ION_TRANSPORT		45	0.457256	1.57636	0.0219561	0.113445	0.97	4212	tags=29%, list=8%, signal=31%
GO_GASTRULATION_WITH_MOUTH_FORMING_SECOND	GO_GASTRULATION_WITH_MOUTH_FORMING_SECOND		27	0.577004	1.57502	0.04	0.11419	0.972	3512	tags=37%, list=6%, signal=40%
GO_PHOSPHATIDYLSERINE_ACYL_CHAIN_REMODELING	GO_PHOSPHATIDYLSERINE_ACYL_CHAIN_REMODELING		20	0.55999	1.57413	0.0234542	0.114751	0.973	4729	tags=35%, list=9%, signal=38%
GO_NON_RECOMBINATIONAL_REPAIR	GO_NON_RECOMBINATIONAL_REPAIR		88	0.510063	1.5726	0.0452586	0.115596	0.973	5960	tags=40%, list=11%, signal=45%
GO_NEGATIVE_REGULATION_OF_BINDING	GO_NEGATIVE_REGULATION_OF_BINDING		166	0.405455	1.5725	0.0209205	0.115509	0.973	6073	tags=31%, list=11%, signal=34%
GO_REGULATION_OF_DEPHOSPHORYLATION	GO_REGULATION_OF_DEPHOSPHORYLATION		209	0.416523	1.57235	0.0388548	0.115465	0.973	5991	tags=36%, list=11%, signal=40%
GO_REGULATION_OF_PHOSPHATIDYLINOSITOL_3_KINASE_SIGNALING	GO_REGULATION_OF_PHOSPHATIDYLINOSITOL_3_KINASE_SIGNALING		124	0.438439	1.57195	0.04	0.115709	0.976	5192	tags=26%, list=9%, signal=28%
GO_POSITIVE_REGULATION_OF_CELL_MORPHOGENESIS_INVOLVED_IN_DIFFERENTIATION	GO_POSITIVE_REGULATION_OF_CELL_MORPHOGENESIS_INVOLVED_IN_DIFFERENTIATION		157	0.432231	1.57166	0.0451745	0.115792	0.976	5905	tags=35%, list=11%, signal=39%
GO_POSITIVE_REGULATION_OF_CYTOKINESIS	GO_POSITIVE_REGULATION_OF_CYTOKINESIS		40	0.523723	1.5698	0.033195	0.117127	0.976	4130	tags=28%, list=7%, signal=30%
GO_POSITIVE_REGULATION_OF_CELLULAR_AMIDE_METABOLIC_PROCESS	GO_POSITIVE_REGULATION_OF_CELLULAR_AMIDE_METABOLIC_PROCESS		165	0.415907	1.56954	0.0432099	0.117117	0.976	6053	tags=35%, list=11%, signal=39%
GO_POSITIVE_REGULATION_OF_VIRAL_LIFE_CYCLE	GO_POSITIVE_REGULATION_OF_VIRAL_LIFE_CYCLE		61	0.474906	1.56916	0.0393375	0.117242	0.976	5708	tags=41%, list=10%, signal=46%
GO_CANONICAL_WNT_SIGNALING_PATHWAY	GO_CANONICAL_WNT_SIGNALING_PATHWAY		332	0.406277	1.56884	0.020202	0.117382	0.976	6158	tags=31%, list=11%, signal=35%
GO_NEGATIVE_REGULATION_OF_CELLULAR_RESPONSE_TO_TRANSFORMING_GROWTH_FACTOR_BETA_STIMULUS	GO_NEGATIVE_REGULATION_OF_CELLULAR_RESPONSE_TO_TRANSFORMING_GROWTH_FACTOR_BETA_STIMULUS		87	0.45238	1.56879	0.0471311	0.11725	0.976	6951	tags=40%, list=13%, signal=46%
GO_POSITIVE_REGULATION_OF_CANONICAL_WNT_SIGNALING_PATHWAY	GO_POSITIVE_REGULATION_OF_CANONICAL_WNT_SIGNALING_PATHWAY		148	0.428976	1.56872	0.0383838	0.117138	0.976	7047	tags=36%, list=13%, signal=41%
GO_PROTEIN_LOCALIZATION_TO_POSTSYNAPSE	GO_PROTEIN_LOCALIZATION_TO_POSTSYNAPSE		47	0.455871	1.5682	0.0188679	0.117409	0.976	6631	tags=40%, list=12%, signal=46%
GO_NEGATIVE_REGULATION_OF_TRANSCRIPTION_REGULATORY_REGION_DNA_BINDING	GO_NEGATIVE_REGULATION_OF_TRANSCRIPTION_REGULATORY_REGION_DNA_BINDING		21	0.505379	1.56781	0.0335968	0.11756	0.976	5473	tags=43%, list=10%, signal=48%
GO_REGULATION_OF_WATER_LOSS_VIA_SKIN	GO_REGULATION_OF_WATER_LOSS_VIA_SKIN		28	0.523621	1.56777	0.028	0.117429	0.976	6896	tags=50%, list=12%, signal=57%
GO_AXONAL_TRANSPORT	GO_AXONAL_TRANSPORT		59	0.477948	1.567	0.0457256	0.117892	0.976	4909	tags=36%, list=9%, signal=39%
GO_REGULATION_OF_POSTSYNAPTIC_NEUROTRANSMITTER_RECEPTOR_ACTIVITY	GO_REGULATION_OF_POSTSYNAPTIC_NEUROTRANSMITTER_RECEPTOR_ACTIVITY		17	0.577429	1.56649	0.0412574	0.118133	0.977	1170	tags=24%, list=2%, signal=24%
GO_POSITIVE_REGULATION_OF_ESTABLISHMENT_OF_PROTEIN_LOCALIZATION	GO_POSITIVE_REGULATION_OF_ESTABLISHMENT_OF_PROTEIN_LOCALIZATION		398	0.393154	1.56579	0.0151515	0.118389	0.977	6053	tags=29%, list=11%, signal=32%
GO_MITOTIC_CYTOKINESIS	GO_MITOTIC_CYTOKINESIS		71	0.493617	1.56543	0.0416667	0.118355	0.977	7948	tags=48%, list=14%, signal=56%
GO_POSITIVE_REGULATION_OF_CELL_CYCLE	GO_POSITIVE_REGULATION_OF_CELL_CYCLE		391	0.414429	1.56488	0.0274262	0.118461	0.978	5884	tags=32%, list=11%, signal=35%
GO_RECEPTOR_CLUSTERING	GO_RECEPTOR_CLUSTERING		56	0.422901	1.56462	0.022869	0.118496	0.978	6631	tags=38%, list=12%, signal=43%
GO_STEROID_HORMONE_MEDIATED_SIGNALING_PATHWAY	GO_STEROID_HORMONE_MEDIATED_SIGNALING_PATHWAY		139	0.443016	1.56451	0.0308008	0.118435	0.978	6596	tags=40%, list=12%, signal=45%
GO_POSITIVE_REGULATION_OF_TELOMERE_CAPPING	GO_POSITIVE_REGULATION_OF_TELOMERE_CAPPING		17	0.564854	1.56448	0.0425101	0.118298	0.978	5142	tags=41%, list=9%, signal=45%
GO_INTRINSIC_APOPTOTIC_SIGNALING_PATHWAY_IN_RESPONSE_TO_OXIDATIVE_STRESS	GO_INTRINSIC_APOPTOTIC_SIGNALING_PATHWAY_IN_RESPONSE_TO_OXIDATIVE_STRESS		43	0.469053	1.56422	0.0447761	0.118324	0.979	5886	tags=37%, list=11%, signal=42%
GO_REACTIVE_OXYGEN_SPECIES_BIOSYNTHETIC_PROCESS	GO_REACTIVE_OXYGEN_SPECIES_BIOSYNTHETIC_PROCESS		121	0.408553	1.56415	0.029106	0.118218	0.979	4253	tags=22%, list=8%, signal=24%
GO_ACIDIC_AMINO_ACID_TRANSPORT	GO_ACIDIC_AMINO_ACID_TRANSPORT		71	0.423346	1.56413	0.0121704	0.118071	0.979	3808	tags=25%, list=7%, signal=27%
GO_OOCYTE_MATURATION	GO_OOCYTE_MATURATION		27	0.512497	1.56388	0.0388548	0.118059	0.979	8867	tags=48%, list=16%, signal=57%
GO_POSITIVE_REGULATION_OF_RNA_SPLICING	GO_POSITIVE_REGULATION_OF_RNA_SPLICING		37	0.549274	1.56362	0.0378151	0.118101	0.979	7555	tags=41%, list=14%, signal=47%
GO_EPITHELIAL_TO_MESENCHYMAL_TRANSITION	GO_EPITHELIAL_TO_MESENCHYMAL_TRANSITION		148	0.435381	1.56311	0.0376569	0.118172	0.979	5617	tags=32%, list=10%, signal=36%
GO_REGULATION_OF_STEM_CELL_POPULATION_MAINTENANCE	GO_REGULATION_OF_STEM_CELL_POPULATION_MAINTENANCE		34	0.53354	1.5614	0.0308642	0.119173	0.979	6306	tags=44%, list=11%, signal=50%
GO_POSITIVE_REGULATION_OF_PROTEIN_TARGETING_TO_MITOCHONDRION	GO_POSITIVE_REGULATION_OF_PROTEIN_TARGETING_TO_MITOCHONDRION		32	0.49404	1.56135	0.038055	0.119047	0.979	5586	tags=38%, list=10%, signal=42%
GO_RESPONSE_TO_TRANSFORMING_GROWTH_FACTOR_BETA	GO_RESPONSE_TO_TRANSFORMING_GROWTH_FACTOR_BETA		255	0.415731	1.56128	0.0452675	0.118962	0.979	6661	tags=37%, list=12%, signal=42%
GO_NEGATIVE_REGULATION_OF_CELL_AGING	GO_NEGATIVE_REGULATION_OF_CELL_AGING		27	0.525488	1.56105	0.04	0.11898	0.979	4637	tags=33%, list=8%, signal=36%
GO_REGULATION_OF_MUSCLE_HYPERTROPHY	GO_REGULATION_OF_MUSCLE_HYPERTROPHY		66	0.437164	1.56103	0.0385396	0.118832	0.979	7902	tags=36%, list=14%, signal=42%
GO_REGULATION_OF_RESPONSE_TO_DNA_DAMAGE_STIMULUS	GO_REGULATION_OF_RESPONSE_TO_DNA_DAMAGE_STIMULUS		222	0.447172	1.56093	0.0388769	0.118757	0.979	6730	tags=39%, list=12%, signal=44%
GO_VESICLE_LOCALIZATION	GO_VESICLE_LOCALIZATION		227	0.438843	1.56088	0.0455487	0.118628	0.979	5326	tags=34%, list=10%, signal=38%
GO_MODULATION_BY_HOST_OF_VIRAL_PROCESS	GO_MODULATION_BY_HOST_OF_VIRAL_PROCESS		30	0.479678	1.55923	0.0299401	0.119451	0.979	5708	tags=40%, list=10%, signal=45%
GO_NEGATIVE_REGULATION_OF_CELLULAR_RESPONSE_TO_GROWTH_FACTOR_STIMULUS	GO_NEGATIVE_REGULATION_OF_CELLULAR_RESPONSE_TO_GROWTH_FACTOR_STIMULUS		175	0.420494	1.55826	0.029106	0.119574	0.979	5931	tags=30%, list=11%, signal=34%
GO_CENTRAL_NERVOUS_SYSTEM_PROJECTION_NEURON_AXONOGENESIS	GO_CENTRAL_NERVOUS_SYSTEM_PROJECTION_NEURON_AXONOGENESIS		26	0.516372	1.55778	0.0351562	0.1196	0.979	4033	tags=31%, list=7%, signal=33%
GO_MALE_SEX_DIFFERENTIATION	GO_MALE_SEX_DIFFERENTIATION		162	0.406906	1.55592	0.0273684	0.120288	0.98	5538	tags=29%, list=10%, signal=32%
GO_POSITIVE_REGULATION_OF_DNA_RECOMBINATION	GO_POSITIVE_REGULATION_OF_DNA_RECOMBINATION		45	0.509021	1.5555	0.0463158	0.120321	0.98	4409	tags=31%, list=8%, signal=34%
GO_ORGANELLE_TRANSPORT_ALONG_MICROTUBULE	GO_ORGANELLE_TRANSPORT_ALONG_MICROTUBULE		85	0.476197	1.55496	0.0383065	0.120124	0.98	6541	tags=41%, list=12%, signal=47%
GO_NEGATIVE_REGULATION_OF_PEPTIDYL_THREONINE_PHOSPHORYLATION	GO_NEGATIVE_REGULATION_OF_PEPTIDYL_THREONINE_PHOSPHORYLATION		20	0.550836	1.55493	0.0392157	0.120005	0.98	3338	tags=35%, list=6%, signal=37%
GO_CENTRAL_NERVOUS_SYSTEM_NEURON_DEVELOPMENT	GO_CENTRAL_NERVOUS_SYSTEM_NEURON_DEVELOPMENT		82	0.443372	1.55465	0.0345528	0.119904	0.98	5914	tags=35%, list=11%, signal=40%
GO_MAMMARY_GLAND_MORPHOGENESIS	GO_MAMMARY_GLAND_MORPHOGENESIS		45	0.477405	1.55385	0.0449898	0.120122	0.98	5781	tags=38%, list=10%, signal=42%
GO_MOTOR_NEURON_AXON_GUIDANCE	GO_MOTOR_NEURON_AXON_GUIDANCE		31	0.491332	1.55312	0.026749	0.12035	0.98	5637	tags=35%, list=10%, signal=39%
GO_HISTONE_MRNA_METABOLIC_PROCESS	GO_HISTONE_MRNA_METABOLIC_PROCESS		25	0.564474	1.55294	0.0387931	0.120331	0.98	5365	tags=52%, list=10%, signal=58%
GO_REGULATION_OF_MAMMARY_GLAND_EPITHELIAL_CELL_PROLIFERATION	GO_REGULATION_OF_MAMMARY_GLAND_EPITHELIAL_CELL_PROLIFERATION		17	0.560178	1.55286	0.0378486	0.120256	0.98	4975	tags=35%, list=9%, signal=39%
GO_REGULATION_OF_VASCULOGENESIS	GO_REGULATION_OF_VASCULOGENESIS		16	0.580896	1.55207	0.0354906	0.120597	0.98	3917	tags=50%, list=7%, signal=54%
GO_INOSITOL_PHOSPHATE_METABOLIC_PROCESS	GO_INOSITOL_PHOSPHATE_METABOLIC_PROCESS		71	0.427484	1.55142	0.0254403	0.12099	0.98	6829	tags=38%, list=12%, signal=43%
GO_POSITIVE_REGULATION_OF_GLYCOPROTEIN_METABOLIC_PROCESS	GO_POSITIVE_REGULATION_OF_GLYCOPROTEIN_METABOLIC_PROCESS		26	0.532764	1.55104	0.0232068	0.121121	0.98	5201	tags=46%, list=9%, signal=51%
GO_NEGATIVE_REGULATION_OF_RESPONSE_TO_DNA_DAMAGE_STIMULUS	GO_NEGATIVE_REGULATION_OF_RESPONSE_TO_DNA_DAMAGE_STIMULUS		81	0.450754	1.54931	0.0377359	0.122375	0.98	6626	tags=42%, list=12%, signal=48%
GO_POSITIVE_REGULATION_OF_PROTEIN_BINDING	GO_POSITIVE_REGULATION_OF_PROTEIN_BINDING		84	0.438331	1.5488	0.0313152	0.12263	0.98	5475	tags=39%, list=10%, signal=44%
GO_CELLULAR_RESPONSE_TO_DRUG	GO_CELLULAR_RESPONSE_TO_DRUG		70	0.44366	1.54826	0.0275424	0.122925	0.98	3471	tags=29%, list=6%, signal=30%
GO_REGULATION_OF_ARP2_3_COMPLEX_MEDIATED_ACTIN_NUCLEATION	GO_REGULATION_OF_ARP2_3_COMPLEX_MEDIATED_ACTIN_NUCLEATION		20	0.542623	1.54728	0.0491803	0.123394	0.98	4383	tags=50%, list=8%, signal=54%
GO_REGULATION_OF_EPITHELIAL_TO_MESENCHYMAL_TRANSITION	GO_REGULATION_OF_EPITHELIAL_TO_MESENCHYMAL_TRANSITION		95	0.453091	1.54658	0.0440252	0.123476	0.98	5617	tags=34%, list=10%, signal=37%
GO_NEGATIVE_REGULATION_OF_PROTEIN_CATABOLIC_PROCESS	GO_NEGATIVE_REGULATION_OF_PROTEIN_CATABOLIC_PROCESS		130	0.412808	1.54646	0.0468432	0.123382	0.98	6695	tags=35%, list=12%, signal=40%
GO_POSITIVE_REGULATION_OF_AUTOPHAGY_OF_MITOCHONDRION	GO_POSITIVE_REGULATION_OF_AUTOPHAGY_OF_MITOCHONDRION		21	0.549442	1.5461	0.0474227	0.123511	0.98	3310	tags=43%, list=6%, signal=46%
GO_NEGATIVE_REGULATION_OF_TRANSMEMBRANE_RECEPTOR_PROTEIN_SERINE_THREONINE_KINASE_SIGNALING_PATHWAY	GO_NEGATIVE_REGULATION_OF_TRANSMEMBRANE_RECEPTOR_PROTEIN_SERINE_THREONINE_KINASE_SIGNALING_PATHWAY		129	0.424703	1.54522	0.037037	0.123746	0.98	6661	tags=36%, list=12%, signal=40%
GO_RESPONSE_TO_RADIATION	GO_RESPONSE_TO_RADIATION		440	0.38873	1.54358	0.0407725	0.124317	0.981	5487	tags=30%, list=10%, signal=33%
GO_ESTABLISHMENT_OF_EPITHELIAL_CELL_APICAL_BASAL_POLARITY	GO_ESTABLISHMENT_OF_EPITHELIAL_CELL_APICAL_BASAL_POLARITY		15	0.544861	1.54334	0.0393701	0.124372	0.981	4750	tags=53%, list=9%, signal=58%
GO_POSITIVE_REGULATION_OF_TUMOR_NECROSIS_FACTOR_SECRETION	GO_POSITIVE_REGULATION_OF_TUMOR_NECROSIS_FACTOR_SECRETION		26	0.560773	1.5419	0.0497925	0.124812	0.981	3643	tags=27%, list=7%, signal=29%
GO_CYTOSKELETON_DEPENDENT_INTRACELLULAR_TRANSPORT	GO_CYTOSKELETON_DEPENDENT_INTRACELLULAR_TRANSPORT		199	0.429975	1.5418	0.0391753	0.124723	0.981	5663	tags=35%, list=10%, signal=39%
GO_INSULIN_LIKE_GROWTH_FACTOR_RECEPTOR_SIGNALING_PATHWAY	GO_INSULIN_LIKE_GROWTH_FACTOR_RECEPTOR_SIGNALING_PATHWAY		36	0.467998	1.54143	0.0324544	0.124894	0.981	3299	tags=25%, list=6%, signal=27%
GO_HETEROPHILIC_CELL_CELL_ADHESION_VIA_PLASMA_MEMBRANE_CELL_ADHESION_MOLECULES	GO_HETEROPHILIC_CELL_CELL_ADHESION_VIA_PLASMA_MEMBRANE_CELL_ADHESION_MOLECULES		47	0.456163	1.54047	0.0471311	0.125514	0.981	3807	tags=19%, list=7%, signal=21%
GO_NEGATIVE_REGULATION_OF_PROTEIN_MODIFICATION_BY_SMALL_PROTEIN_CONJUGATION_OR_REMOVAL	GO_NEGATIVE_REGULATION_OF_PROTEIN_MODIFICATION_BY_SMALL_PROTEIN_CONJUGATION_OR_REMOVAL		90	0.415017	1.54002	0.0298805	0.125255	0.981	5835	tags=33%, list=11%, signal=37%
GO_POSITIVE_REGULATION_OF_VASCULAR_ENDOTHELIAL_GROWTH_FACTOR_PRODUCTION	GO_POSITIVE_REGULATION_OF_VASCULAR_ENDOTHELIAL_GROWTH_FACTOR_PRODUCTION		28	0.526987	1.53894	0.0443038	0.125588	0.981	4065	tags=32%, list=7%, signal=35%
GO_NEGATIVE_REGULATION_OF_CELLULAR_PROTEIN_CATABOLIC_PROCESS	GO_NEGATIVE_REGULATION_OF_CELLULAR_PROTEIN_CATABOLIC_PROCESS		84	0.441965	1.53883	0.0452675	0.125514	0.981	4930	tags=32%, list=9%, signal=35%
GO_PALLIUM_DEVELOPMENT	GO_PALLIUM_DEVELOPMENT		168	0.41674	1.5386	0.0392562	0.125512	0.981	5942	tags=33%, list=11%, signal=37%
GO_REGULATION_OF_PEPTIDYL_SERINE_PHOSPHORYLATION	GO_REGULATION_OF_PEPTIDYL_SERINE_PHOSPHORYLATION		145	0.392629	1.53857	0.026087	0.125393	0.981	7710	tags=37%, list=14%, signal=42%
GO_PHOSPHOLIPID_METABOLIC_PROCESS	GO_PHOSPHOLIPID_METABOLIC_PROCESS		447	0.372893	1.53839	0.0230608	0.125394	0.981	6219	tags=29%, list=11%, signal=33%
GO_INTRACELLULAR_ESTROGEN_RECEPTOR_SIGNALING_PATHWAY	GO_INTRACELLULAR_ESTROGEN_RECEPTOR_SIGNALING_PATHWAY		57	0.478021	1.53792	0.0381356	0.125465	0.981	5701	tags=37%, list=10%, signal=41%
GO_PHOSPHATIDYLINOSITOL_METABOLIC_PROCESS	GO_PHOSPHATIDYLINOSITOL_METABOLIC_PROCESS		181	0.419863	1.5359	0.045929	0.12673	0.982	6219	tags=32%, list=11%, signal=36%
GO_RESPONSE_TO_STEROID_HORMONE	GO_RESPONSE_TO_STEROID_HORMONE		345	0.370038	1.53452	0.0274262	0.127532	0.983	6662	tags=31%, list=12%, signal=35%
GO_REGULATION_OF_GLIOGENESIS	GO_REGULATION_OF_GLIOGENESIS		125	0.403905	1.53405	0.0293501	0.12764	0.983	6018	tags=30%, list=11%, signal=33%
GO_NEGATIVE_REGULATION_OF_DNA_BINDING	GO_NEGATIVE_REGULATION_OF_DNA_BINDING		52	0.449881	1.53382	0.0354906	0.127658	0.983	5617	tags=35%, list=10%, signal=38%
GO_CELLULAR_RESPONSE_TO_VIRUS	GO_CELLULAR_RESPONSE_TO_VIRUS		60	0.457071	1.53319	0.0412371	0.127982	0.983	3643	tags=28%, list=7%, signal=30%
GO_REGULATION_OF_PLASMA_MEMBRANE_ORGANIZATION	GO_REGULATION_OF_PLASMA_MEMBRANE_ORGANIZATION		16	0.531586	1.53288	0.0496894	0.128079	0.983	6587	tags=50%, list=12%, signal=57%
GO_CELL_SUBSTRATE_ADHESION	GO_CELL_SUBSTRATE_ADHESION		352	0.409152	1.53267	0.0448065	0.127924	0.983	4757	tags=26%, list=9%, signal=28%
GO_SERTOLI_CELL_DIFFERENTIATION	GO_SERTOLI_CELL_DIFFERENTIATION		21	0.499628	1.53256	0.026749	0.127861	0.983	4081	tags=33%, list=7%, signal=36%
GO_LABYRINTHINE_LAYER_DEVELOPMENT	GO_LABYRINTHINE_LAYER_DEVELOPMENT		48	0.446032	1.53152	0.0210526	0.128394	0.983	5020	tags=33%, list=9%, signal=37%
GO_REGULATION_OF_VIRAL_LIFE_CYCLE	GO_REGULATION_OF_VIRAL_LIFE_CYCLE		154	0.432628	1.53141	0.0423729	0.128308	0.983	6252	tags=34%, list=11%, signal=38%
GO_EPITHELIAL_TUBE_MORPHOGENESIS	GO_EPITHELIAL_TUBE_MORPHOGENESIS		330	0.404617	1.52889	0.0442105	0.129548	0.984	6134	tags=32%, list=11%, signal=36%
GO_ACTIVATION_OF_MAPK_ACTIVITY	GO_ACTIVATION_OF_MAPK_ACTIVITY		155	0.407624	1.52868	0.0293501	0.129534	0.984	5366	tags=30%, list=10%, signal=33%
GO_HOMOTYPIC_CELL_CELL_ADHESION	GO_HOMOTYPIC_CELL_CELL_ADHESION		86	0.433748	1.52831	0.0462185	0.129717	0.984	8167	tags=38%, list=15%, signal=45%
GO_POSITIVE_REGULATION_OF_ESTABLISHMENT_OF_PROTEIN_LOCALIZATION_TO_MITOCHONDRION	GO_POSITIVE_REGULATION_OF_ESTABLISHMENT_OF_PROTEIN_LOCALIZATION_TO_MITOCHONDRION		58	0.444592	1.52826	0.0470085	0.129596	0.984	5586	tags=33%, list=10%, signal=36%
GO_REGULATION_OF_PROTEIN_MODIFICATION_BY_SMALL_PROTEIN_CONJUGATION_OR_REMOVAL	GO_REGULATION_OF_PROTEIN_MODIFICATION_BY_SMALL_PROTEIN_CONJUGATION_OR_REMOVAL		238	0.414628	1.52818	0.0465116	0.129525	0.985	5137	tags=32%, list=9%, signal=35%
GO_PROTEIN_CATABOLIC_PROCESS_IN_THE_VACUOLE	GO_PROTEIN_CATABOLIC_PROCESS_IN_THE_VACUOLE		19	0.542228	1.5261	0.0398406	0.13089	0.985	5480	tags=53%, list=10%, signal=58%
GO_POSITIVE_REGULATION_OF_STRIATED_MUSCLE_CELL_APOPTOTIC_PROCESS	GO_POSITIVE_REGULATION_OF_STRIATED_MUSCLE_CELL_APOPTOTIC_PROCESS		16	0.522544	1.52535	0.0483193	0.130904	0.986	1956	tags=19%, list=4%, signal=19%
GO_REGULATION_OF_BINDING	GO_REGULATION_OF_BINDING		360	0.377203	1.52335	0.0277778	0.132154	0.986	5701	tags=30%, list=10%, signal=34%
GO_REGULATION_OF_ANDROGEN_RECEPTOR_SIGNALING_PATHWAY	GO_REGULATION_OF_ANDROGEN_RECEPTOR_SIGNALING_PATHWAY		26	0.508479	1.52329	0.0425101	0.132078	0.986	6548	tags=38%, list=12%, signal=44%
GO_REGULATION_OF_PROTEASOMAL_PROTEIN_CATABOLIC_PROCESS	GO_REGULATION_OF_PROTEASOMAL_PROTEIN_CATABOLIC_PROCESS		189	0.414646	1.52288	0.0341151	0.131936	0.986	5480	tags=30%, list=10%, signal=33%
GO_REGULATION_OF_VACUOLE_ORGANIZATION	GO_REGULATION_OF_VACUOLE_ORGANIZATION		46	0.47391	1.5222	0.0377359	0.13218	0.986	5001	tags=41%, list=9%, signal=45%
GO_MESENCHYMAL_CELL_DIFFERENTIATION	GO_MESENCHYMAL_CELL_DIFFERENTIATION		225	0.406343	1.52038	0.0407332	0.133089	0.986	5617	tags=31%, list=10%, signal=34%
GO_NEGATIVE_REGULATION_OF_ANDROGEN_RECEPTOR_SIGNALING_PATHWAY	GO_NEGATIVE_REGULATION_OF_ANDROGEN_RECEPTOR_SIGNALING_PATHWAY		15	0.574694	1.51941	0.0488281	0.133427	0.987	6548	tags=40%, list=12%, signal=45%
GO_NEGATIVE_REGULATION_OF_DENDRITE_MORPHOGENESIS	GO_NEGATIVE_REGULATION_OF_DENDRITE_MORPHOGENESIS		16	0.551192	1.51796	0.0498008	0.134013	0.988	2972	tags=38%, list=5%, signal=40%
GO_POSITIVE_REGULATION_OF_UBIQUITIN_DEPENDENT_PROTEIN_CATABOLIC_PROCESS	GO_POSITIVE_REGULATION_OF_UBIQUITIN_DEPENDENT_PROTEIN_CATABOLIC_PROCESS		102	0.417072	1.51702	0.0477178	0.134649	0.988	5480	tags=30%, list=10%, signal=34%
GO_POSITIVE_REGULATION_OF_SYNAPTIC_TRANSMISSION	GO_POSITIVE_REGULATION_OF_SYNAPTIC_TRANSMISSION		172	0.393723	1.51625	0.0269151	0.134631	0.988	4312	tags=23%, list=8%, signal=25%
GO_NEGATIVE_REGULATION_OF_CYCLIN_DEPENDENT_PROTEIN_KINASE_ACTIVITY	GO_NEGATIVE_REGULATION_OF_CYCLIN_DEPENDENT_PROTEIN_KINASE_ACTIVITY		32	0.471441	1.5112	0.0372671	0.137879	0.988	8743	tags=41%, list=16%, signal=48%
GO_TISSUE_MIGRATION	GO_TISSUE_MIGRATION		350	0.379983	1.51108	0.048	0.137822	0.988	6178	tags=27%, list=11%, signal=30%
GO_POSITIVE_REGULATION_OF_CELL_CYCLE_G2_M_PHASE_TRANSITION	GO_POSITIVE_REGULATION_OF_CELL_CYCLE_G2_M_PHASE_TRANSITION		30	0.519768	1.50682	0.0388548	0.140065	0.988	5755	tags=43%, list=10%, signal=48%
GO_CELLULAR_RESPONSE_TO_LOW_DENSITY_LIPOPROTEIN_PARTICLE_STIMULUS	GO_CELLULAR_RESPONSE_TO_LOW_DENSITY_LIPOPROTEIN_PARTICLE_STIMULUS		21	0.518987	1.50673	0.0460922	0.139979	0.988	2543	tags=29%, list=5%, signal=30%
GO_REGULATION_OF_RESPONSE_TO_OXIDATIVE_STRESS	GO_REGULATION_OF_RESPONSE_TO_OXIDATIVE_STRESS		87	0.415971	1.50534	0.0267857	0.140705	0.988	4787	tags=30%, list=9%, signal=33%
GO_PERIPHERAL_NERVOUS_SYSTEM_DEVELOPMENT	GO_PERIPHERAL_NERVOUS_SYSTEM_DEVELOPMENT		77	0.408868	1.50525	0.021611	0.140644	0.988	5637	tags=31%, list=10%, signal=35%
GO_CLATHRIN_COAT_ASSEMBLY	GO_CLATHRIN_COAT_ASSEMBLY		18	0.520965	1.50181	0.0424242	0.141421	0.988	7600	tags=56%, list=14%, signal=64%
GO_STEM_CELL_PROLIFERATION	GO_STEM_CELL_PROLIFERATION		123	0.406135	1.50161	0.0482897	0.141427	0.988	5026	tags=28%, list=9%, signal=30%
GO_RESPONSE_TO_IMMOBILIZATION_STRESS	GO_RESPONSE_TO_IMMOBILIZATION_STRESS		26	0.49411	1.49979	0.0229167	0.142332	0.988	4507	tags=35%, list=8%, signal=38%
GO_PHOSPHATIDYLCHOLINE_BIOSYNTHETIC_PROCESS	GO_PHOSPHATIDYLCHOLINE_BIOSYNTHETIC_PROCESS		39	0.426931	1.49908	0.0257937	0.142325	0.989	6404	tags=31%, list=12%, signal=35%
GO_DEPHOSPHORYLATION	GO_DEPHOSPHORYLATION		490	0.38247	1.49642	0.0472103	0.143812	0.989	6462	tags=32%, list=12%, signal=36%
GO_PHOSPHATIDYLINOSITOL_3_KINASE_SIGNALING	GO_PHOSPHATIDYLINOSITOL_3_KINASE_SIGNALING		151	0.412063	1.49591	0.0491453	0.143924	0.989	3482	tags=22%, list=6%, signal=23%
GO_CHROMOSOME_ORGANIZATION_INVOLVED_IN_MEIOTIC_CELL_CYCLE	GO_CHROMOSOME_ORGANIZATION_INVOLVED_IN_MEIOTIC_CELL_CYCLE		68	0.441998	1.49577	0.0455487	0.143871	0.989	6888	tags=38%, list=12%, signal=44%
GO_AMEBOIDAL_TYPE_CELL_MIGRATION	GO_AMEBOIDAL_TYPE_CELL_MIGRATION		456	0.377259	1.49502	0.0489796	0.144336	0.989	6178	tags=27%, list=11%, signal=30%
GO_NITRIC_OXIDE_MEDIATED_SIGNAL_TRANSDUCTION	GO_NITRIC_OXIDE_MEDIATED_SIGNAL_TRANSDUCTION		29	0.49867	1.4949	0.0394477	0.144304	0.989	3656	tags=24%, list=7%, signal=26%
GO_NEGATIVE_REGULATION_OF_APOPTOTIC_SIGNALING_PATHWAY	GO_NEGATIVE_REGULATION_OF_APOPTOTIC_SIGNALING_PATHWAY		228	0.375248	1.49348	0.0352697	0.145091	0.99	5755	tags=28%, list=10%, signal=31%
GO_REGULATION_OF_PROTEIN_BINDING	GO_REGULATION_OF_PROTEIN_BINDING		208	0.378397	1.49343	0.0458333	0.144973	0.99	6073	tags=32%, list=11%, signal=36%
GO_POSITIVE_REGULATION_OF_EPITHELIAL_CELL_PROLIFERATION	GO_POSITIVE_REGULATION_OF_EPITHELIAL_CELL_PROLIFERATION		206	0.392058	1.49131	0.0399202	0.145651	0.992	4036	tags=23%, list=7%, signal=25%
GO_POSITIVE_REGULATION_OF_EMBRYONIC_DEVELOPMENT	GO_POSITIVE_REGULATION_OF_EMBRYONIC_DEVELOPMENT		40	0.464262	1.49086	0.0494845	0.145857	0.992	2333	tags=23%, list=4%, signal=23%
GO_POSITIVE_REGULATION_OF_INSULIN_SECRETION_INVOLVED_IN_CELLULAR_RESPONSE_TO_GLUCOSE_STIMULUS	GO_POSITIVE_REGULATION_OF_INSULIN_SECRETION_INVOLVED_IN_CELLULAR_RESPONSE_TO_GLUCOSE_STIMULUS		34	0.450354	1.49065	0.036961	0.145873	0.992	4181	tags=26%, list=8%, signal=29%
GO_RESPONSE_TO_AXON_INJURY	GO_RESPONSE_TO_AXON_INJURY		79	0.396366	1.4762	0.0452675	0.152426	0.995	5192	tags=29%, list=9%, signal=32%
GO_PIGMENTATION	GO_PIGMENTATION		99	0.403151	1.47619	0.0475207	0.152278	0.995	5234	tags=28%, list=9%, signal=31%
GO_REGULATION_OF_MITOCHONDRION_ORGANIZATION	GO_REGULATION_OF_MITOCHONDRION_ORGANIZATION		189	0.374132	1.47571	0.0486258	0.152531	0.995	3681	tags=26%, list=7%, signal=28%
GO_HORMONE_MEDIATED_SIGNALING_PATHWAY	GO_HORMONE_MEDIATED_SIGNALING_PATHWAY		200	0.393755	1.47333	0.0435685	0.153361	0.995	6596	tags=34%, list=12%, signal=38%
GO_SKIN_DEVELOPMENT	GO_SKIN_DEVELOPMENT		420	0.367412	1.47116	0.0318091	0.153631	0.996	5700	tags=22%, list=10%, signal=25%
GO_MUSCLE_CELL_CELLULAR_HOMEOSTASIS	GO_MUSCLE_CELL_CELLULAR_HOMEOSTASIS		21	0.482209	1.47114	0.0444444	0.153499	0.996	3881	tags=38%, list=7%, signal=41%
GO_RESPONSE_TO_PEPTIDE_HORMONE	GO_RESPONSE_TO_PEPTIDE_HORMONE		442	0.35843	1.47103	0.0398323	0.153446	0.996	6736	tags=31%, list=12%, signal=35%
GO_EPITHELIAL_CELL_PROLIFERATION	GO_EPITHELIAL_CELL_PROLIFERATION		435	0.361109	1.46511	0.0417537	0.156221	0.996	5956	tags=26%, list=11%, signal=29%
GO_VASCULAR_ENDOTHELIAL_CELL_PROLIFERATION	GO_VASCULAR_ENDOTHELIAL_CELL_PROLIFERATION		41	0.440909	1.46484	0.0353635	0.156158	0.996	3203	tags=20%, list=6%, signal=21%
GO_POSITIVE_REGULATION_OF_CELL_GROWTH	GO_POSITIVE_REGULATION_OF_CELL_GROWTH		163	0.38657	1.464	0.0474227	0.156149	0.996	5685	tags=31%, list=10%, signal=34%
GO_MAMMARY_GLAND_DEVELOPMENT	GO_MAMMARY_GLAND_DEVELOPMENT		142	0.379311	1.46393	0.0445344	0.156071	0.996	6548	tags=32%, list=12%, signal=37%
GO_REGULATION_OF_RESPIRATORY_GASEOUS_EXCHANGE	GO_REGULATION_OF_RESPIRATORY_GASEOUS_EXCHANGE		23	0.467619	1.45933	0.0386847	0.157383	0.996	5936	tags=30%, list=11%, signal=34%
GO_GLYCEROLIPID_BIOSYNTHETIC_PROCESS	GO_GLYCEROLIPID_BIOSYNTHETIC_PROCESS		267	0.361953	1.45743	0.0398323	0.158019	0.996	5482	tags=26%, list=10%, signal=29%
GO_WATER_HOMEOSTASIS	GO_WATER_HOMEOSTASIS		79	0.373877	1.45657	0.0246914	0.158669	0.996	6896	tags=34%, list=12%, signal=39%
GO_REGULATION_OF_HEART_RATE_BY_CARDIAC_CONDUCTION	GO_REGULATION_OF_HEART_RATE_BY_CARDIAC_CONDUCTION		39	0.420174	1.4563	0.048583	0.158777	0.996	3745	tags=28%, list=7%, signal=30%
GO_REGULATION_OF_BODY_FLUID_LEVELS	GO_REGULATION_OF_BODY_FLUID_LEVELS		498	0.354552	1.45246	0.0458333	0.160588	0.996	6302	tags=27%, list=11%, signal=30%
GO_NEGATIVE_REGULATION_OF_AMYLOID_PRECURSOR_PROTEIN_CATABOLIC_PROCESS	GO_NEGATIVE_REGULATION_OF_AMYLOID_PRECURSOR_PROTEIN_CATABOLIC_PROCESS		17	0.502758	1.45152	0.0452756	0.160946	0.996	3474	tags=41%, list=6%, signal=44%
GO_DOPAMINERGIC_NEURON_DIFFERENTIATION	GO_DOPAMINERGIC_NEURON_DIFFERENTIATION		37	0.439486	1.44535	0.0433884	0.162345	0.996	4823	tags=32%, list=9%, signal=36%
GO_GLYCEROLIPID_METABOLIC_PROCESS	GO_GLYCEROLIPID_METABOLIC_PROCESS		424	0.344953	1.44419	0.0443038	0.162957	0.996	5482	tags=26%, list=10%, signal=28%
GO_REGULATION_OF_MONOOXYGENASE_ACTIVITY	GO_REGULATION_OF_MONOOXYGENASE_ACTIVITY		65	0.399541	1.43905	0.0485232	0.164906	0.996	3662	tags=25%, list=7%, signal=26%
GO_REGULATION_OF_SYNAPTIC_PLASTICITY	GO_REGULATION_OF_SYNAPTIC_PLASTICITY		191	0.361268	1.43283	0.0486815	0.166758	0.996	4169	tags=23%, list=8%, signal=25%
GO_ADULT_LOCOMOTORY_BEHAVIOR	GO_ADULT_LOCOMOTORY_BEHAVIOR		75	0.392145	1.42628	0.0382294	0.169689	0.996	5981	tags=27%, list=11%, signal=30%
GO_NEGATIVE_REGULATION_OF_HYDROLASE_ACTIVITY	GO_NEGATIVE_REGULATION_OF_HYDROLASE_ACTIVITY		458	0.33256	1.42316	0.0442105	0.170494	0.996	5078	tags=23%, list=9%, signal=25%

## Sheet: BP
NAME	name	GS<br> follow link to MSigDB	GS DETAILS	SIZE	ES	NES	NOM p-val	FDR q-val	FWER p-val	RANK AT MAX	LEADING EDGE
GO_AXON_EXTENSION	go_axon_extension	GO_AXON_EXTENSION	Details ...	123	0.651363	2.19313	0	0.00472471	0.004	5637	tags=52%, list=10%, signal=58%
GO_NEURON_PROJECTION_EXTENSION	go_neuron_projection_extension	GO_NEURON_PROJECTION_EXTENSION	Details ...	172	0.587005	2.05378	0	0.150244	0.108	5685	tags=45%, list=10%, signal=50%
GO_EPIDERMAL_GROWTH_FACTOR_RECEPTOR_SIGNALING_PATHWAY	go_epidermal_growth_factor_receptor_signaling_pathway	GO_EPIDERMAL_GROWTH_FACTOR_RECEPTOR_SIGNALING_PATHWAY	Details ...	120	0.596011	2.05359	0	0.100163	0.108	4475	tags=42%, list=8%, signal=45%
GO_DENDRITIC_SPINE_MAINTENANCE	go_dendritic_spine_maintenance	GO_DENDRITIC_SPINE_MAINTENANCE	Details ...	20	0.7372	2.05248	0	0.0763211	0.109	5887	tags=55%, list=11%, signal=62%
GO_PROTEIN_TARGETING_TO_LYSOSOME	go_protein_targeting_to_lysosome	GO_PROTEIN_TARGETING_TO_LYSOSOME	Details ...	22	0.784134	2.04156	0.00202429	0.0787107	0.126	6658	tags=73%, list=12%, signal=83%
GO_BARBED_END_ACTIN_FILAMENT_CAPPING	go_barbed_end_actin_filament_capping	GO_BARBED_END_ACTIN_FILAMENT_CAPPING	Details ...	25	0.696017	2.03529	0	0.0758444	0.135	3369	tags=40%, list=6%, signal=43%
GO_LAMELLIPODIUM_MORPHOGENESIS	go_lamellipodium_morphogenesis	GO_LAMELLIPODIUM_MORPHOGENESIS	Details ...	17	0.772096	2.02546	0	0.0775083	0.15	1229	tags=47%, list=2%, signal=48%
GO_NEGATIVE_REGULATION_OF_GENE_EXPRESSION_EPIGENETIC	go_negative_regulation_of_gene_expression_epigenetic	GO_NEGATIVE_REGULATION_OF_GENE_EXPRESSION_EPIGENETIC	Details ...	60	0.682324	2.02517	0	0.0681815	0.151	6180	tags=53%, list=11%, signal=60%
GO_REGULATION_OF_EXTENT_OF_CELL_GROWTH	go_regulation_of_extent_of_cell_growth	GO_REGULATION_OF_EXTENT_OF_CELL_GROWTH	Details ...	111	0.576054	2.02492	0	0.0607766	0.152	5637	tags=43%, list=10%, signal=48%
GO_POSITIVE_REGULATION_OF_G1_S_TRANSITION_OF_MITOTIC_CELL_CYCLE	go_positive_regulation_of_g1_s_transition_of_mitotic_cell_cycle	GO_POSITIVE_REGULATION_OF_G1_S_TRANSITION_OF_MITOTIC_CELL_CYCLE	Details ...	47	0.612068	2.01714	0	0.0629694	0.162	5026	tags=36%, list=9%, signal=40%
GO_CHROMATIN_SILENCING	go_chromatin_silencing	GO_CHROMATIN_SILENCING	Details ...	41	0.681124	2.00562	0	0.0683443	0.179	5617	tags=51%, list=10%, signal=57%
GO_ENTRY_OF_BACTERIUM_INTO_HOST_CELL	go_entry_of_bacterium_into_host_cell	GO_ENTRY_OF_BACTERIUM_INTO_HOST_CELL	Details ...	15	0.850371	2.00414	0	0.0651376	0.181	1061	tags=40%, list=2%, signal=41%
GO_ERBB_SIGNALING_PATHWAY	go_erbb_signaling_pathway	GO_ERBB_SIGNALING_PATHWAY	Details ...	142	0.556445	1.99322	0	0.0714734	0.207	4475	tags=39%, list=8%, signal=43%
GO_NEGATIVE_REGULATION_OF_RHO_PROTEIN_SIGNAL_TRANSDUCTION	go_negative_regulation_of_rho_protein_signal_transduction	GO_NEGATIVE_REGULATION_OF_RHO_PROTEIN_SIGNAL_TRANSDUCTION	Details ...	22	0.769084	1.9899	0	0.0703511	0.211	5062	tags=64%, list=9%, signal=70%
GO_REGULATION_OF_GENE_EXPRESSION_EPIGENETIC	go_regulation_of_gene_expression_epigenetic	GO_REGULATION_OF_GENE_EXPRESSION_EPIGENETIC	Details ...	143	0.598342	1.98708	0	0.0687674	0.216	6194	tags=48%, list=11%, signal=54%
GO_POSITIVE_REGULATION_OF_PROTEIN_LOCALIZATION_TO_CELL_PERIPHERY	go_positive_regulation_of_protein_localization_to_cell_periphery	GO_POSITIVE_REGULATION_OF_PROTEIN_LOCALIZATION_TO_CELL_PERIPHERY	Details ...	67	0.554993	1.98687	0	0.0645641	0.216	4181	tags=34%, list=8%, signal=37%
GO_AMYLOID_BETA_METABOLIC_PROCESS	go_amyloid_beta_metabolic_process	GO_AMYLOID_BETA_METABOLIC_PROCESS	Details ...	51	0.592584	1.975	0	0.0737703	0.246	5332	tags=49%, list=10%, signal=54%
GO_DEVELOPMENTAL_GROWTH_INVOLVED_IN_MORPHOGENESIS	go_developmental_growth_involved_in_morphogenesis	GO_DEVELOPMENTAL_GROWTH_INVOLVED_IN_MORPHOGENESIS	Details ...	235	0.548158	1.97345	0	0.0722569	0.25	5781	tags=41%, list=10%, signal=45%
GO_CHROMATIN_ORGANIZATION_INVOLVED_IN_REGULATION_OF_TRANSCRIPTION	go_chromatin_organization_involved_in_regulation_of_transcription	GO_CHROMATIN_ORGANIZATION_INVOLVED_IN_REGULATION_OF_TRANSCRIPTION	Details ...	89	0.632923	1.97339	0	0.0685571	0.25	5617	tags=49%, list=10%, signal=55%
GO_MAMMARY_GLAND_EPITHELIAL_CELL_PROLIFERATION	go_mammary_gland_epithelial_cell_proliferation	GO_MAMMARY_GLAND_EPITHELIAL_CELL_PROLIFERATION	Details ...	28	0.668022	1.97223	0	0.0661086	0.253	4975	tags=46%, list=9%, signal=51%
GO_NEGATIVE_REGULATION_OF_RECEPTOR_SIGNALING_PATHWAY_VIA_STAT	go_negative_regulation_of_receptor_signaling_pathway_via_stat	GO_NEGATIVE_REGULATION_OF_RECEPTOR_SIGNALING_PATHWAY_VIA_STAT	Details ...	30	0.629413	1.96692	0	0.0682364	0.263	3733	tags=30%, list=7%, signal=32%
GO_POSITIVE_REGULATION_OF_PROTEIN_TYROSINE_KINASE_ACTIVITY	go_positive_regulation_of_protein_tyrosine_kinase_activity	GO_POSITIVE_REGULATION_OF_PROTEIN_TYROSINE_KINASE_ACTIVITY	Details ...	60	0.5899	1.96494	0	0.0668531	0.265	3575	tags=37%, list=6%, signal=39%
GO_LYSOSOMAL_TRANSPORT	go_lysosomal_transport	GO_LYSOSOMAL_TRANSPORT	Details ...	110	0.597363	1.96384	0	0.0654775	0.271	4881	tags=45%, list=9%, signal=50%
GO_NEGATIVE_REGULATION_OF_CELL_MORPHOGENESIS_INVOLVED_IN_DIFFERENTIATION	go_negative_regulation_of_cell_morphogenesis_involved_in_differentiation	GO_NEGATIVE_REGULATION_OF_CELL_MORPHOGENESIS_INVOLVED_IN_DIFFERENTIATION	Details ...	98	0.559642	1.96058	0	0.0658737	0.278	5420	tags=42%, list=10%, signal=46%
GO_REGULATION_OF_PROTEIN_TYROSINE_KINASE_ACTIVITY	go_regulation_of_protein_tyrosine_kinase_activity	GO_REGULATION_OF_PROTEIN_TYROSINE_KINASE_ACTIVITY	Details ...	92	0.557409	1.95479	0	0.0687063	0.29	5475	tags=41%, list=10%, signal=46%
GO_REGULATION_OF_AXONOGENESIS	go_regulation_of_axonogenesis	GO_REGULATION_OF_AXONOGENESIS	Details ...	186	0.542457	1.95256	0	0.068239	0.297	5637	tags=40%, list=10%, signal=44%
GO_SPHINGOLIPID_BIOSYNTHETIC_PROCESS	go_sphingolipid_biosynthetic_process	GO_SPHINGOLIPID_BIOSYNTHETIC_PROCESS	Details ...	104	0.537382	1.94947	0.00213675	0.0681764	0.301	6339	tags=45%, list=11%, signal=51%
GO_LENS_FIBER_CELL_DIFFERENTIATION	go_lens_fiber_cell_differentiation	GO_LENS_FIBER_CELL_DIFFERENTIATION	Details ...	35	0.614527	1.94662	0	0.0686857	0.31	5250	tags=49%, list=9%, signal=54%
GO_POSITIVE_REGULATION_OF_GENE_EXPRESSION_EPIGENETIC	go_positive_regulation_of_gene_expression_epigenetic	GO_POSITIVE_REGULATION_OF_GENE_EXPRESSION_EPIGENETIC	Details ...	48	0.629778	1.94494	0	0.0684613	0.316	6194	tags=54%, list=11%, signal=61%
GO_NEGATIVE_REGULATION_OF_SMALL_GTPASE_MEDIATED_SIGNAL_TRANSDUCTION	go_negative_regulation_of_small_gtpase_mediated_signal_transduction	GO_NEGATIVE_REGULATION_OF_SMALL_GTPASE_MEDIATED_SIGNAL_TRANSDUCTION	Details ...	58	0.63166	1.94415	0	0.0668779	0.317	5929	tags=55%, list=11%, signal=62%
GO_RESPONSE_TO_X_RAY	go_response_to_x_ray	GO_RESPONSE_TO_X_RAY	Details ...	31	0.692545	1.93919	0.00213675	0.0698776	0.322	3909	tags=48%, list=7%, signal=52%
GO_DEVELOPMENTAL_CELL_GROWTH	go_developmental_cell_growth	GO_DEVELOPMENTAL_CELL_GROWTH	Details ...	231	0.527969	1.93773	0	0.0693915	0.328	5685	tags=39%, list=10%, signal=43%
GO_POSITIVE_REGULATION_OF_FILOPODIUM_ASSEMBLY	go_positive_regulation_of_filopodium_assembly	GO_POSITIVE_REGULATION_OF_FILOPODIUM_ASSEMBLY	Details ...	30	0.638956	1.93164	0.00204499	0.0732822	0.343	3619	tags=47%, list=7%, signal=50%
GO_REGULATION_OF_TYPE_I_INTERFERON_MEDIATED_SIGNALING_PATHWAY	go_regulation_of_type_i_interferon_mediated_signaling_pathway	GO_REGULATION_OF_TYPE_I_INTERFERON_MEDIATED_SIGNALING_PATHWAY	Details ...	34	0.701866	1.92734	0	0.0753896	0.351	3516	tags=50%, list=6%, signal=53%
GO_NEGATIVE_REGULATION_OF_EXTRINSIC_APOPTOTIC_SIGNALING_PATHWAY	go_negative_regulation_of_extrinsic_apoptotic_signaling_pathway	GO_NEGATIVE_REGULATION_OF_EXTRINSIC_APOPTOTIC_SIGNALING_PATHWAY	Details ...	106	0.546645	1.92516	0.00205339	0.0760603	0.359	5312	tags=34%, list=10%, signal=38%
GO_RESPONSE_TO_STEROL_DEPLETION	go_response_to_sterol_depletion	GO_RESPONSE_TO_STEROL_DEPLETION	Details ...	17	0.748921	1.92475	0.00206612	0.0742646	0.36	8032	tags=71%, list=15%, signal=83%
GO_REGULATION_OF_FILOPODIUM_ASSEMBLY	go_regulation_of_filopodium_assembly	GO_REGULATION_OF_FILOPODIUM_ASSEMBLY	Details ...	45	0.593791	1.92418	0.00205339	0.0728974	0.362	3619	tags=47%, list=7%, signal=50%
GO_VESICLE_MEDIATED_TRANSPORT_BETWEEN_ENDOSOMAL_COMPARTMENTS	go_vesicle_mediated_transport_between_endosomal_compartments	GO_VESICLE_MEDIATED_TRANSPORT_BETWEEN_ENDOSOMAL_COMPARTMENTS	Details ...	41	0.644877	1.9217	0.00207039	0.0733867	0.365	4176	tags=51%, list=8%, signal=55%
GO_NEGATIVE_CHEMOTAXIS	go_negative_chemotaxis	GO_NEGATIVE_CHEMOTAXIS	Details ...	47	0.615714	1.91928	0.00403226	0.0742977	0.37	6178	tags=51%, list=11%, signal=57%
GO_POSTSYNAPSE_ORGANIZATION	go_postsynapse_organization	GO_POSTSYNAPSE_ORGANIZATION	Details ...	173	0.516896	1.91645	0	0.0748764	0.377	6056	tags=39%, list=11%, signal=43%
GO_REGULATION_OF_CELL_MORPHOGENESIS	go_regulation_of_cell_morphogenesis	GO_REGULATION_OF_CELL_MORPHOGENESIS	Details ...	496	0.503436	1.91615	0	0.0733228	0.379	6056	tags=39%, list=11%, signal=43%
GO_UTERUS_DEVELOPMENT	go_uterus_development	GO_UTERUS_DEVELOPMENT	Details ...	21	0.797773	1.91148	0.00204918	0.0757293	0.389	6086	tags=52%, list=11%, signal=59%
GO_REGULATION_OF_CELL_MORPHOGENESIS_INVOLVED_IN_DIFFERENTIATION	go_regulation_of_cell_morphogenesis_involved_in_differentiation	GO_REGULATION_OF_CELL_MORPHOGENESIS_INVOLVED_IN_DIFFERENTIATION	Details ...	310	0.506524	1.90987	0	0.0756073	0.392	5729	tags=38%, list=10%, signal=42%
GO_REGULATION_OF_ESTABLISHMENT_OR_MAINTENANCE_OF_CELL_POLARITY	go_regulation_of_establishment_or_maintenance_of_cell_polarity	GO_REGULATION_OF_ESTABLISHMENT_OR_MAINTENANCE_OF_CELL_POLARITY	Details ...	24	0.724687	1.90863	0.00206612	0.0751821	0.395	3642	tags=50%, list=7%, signal=54%
GO_REGULATION_OF_CELL_SIZE	go_regulation_of_cell_size	GO_REGULATION_OF_CELL_SIZE	Details ...	180	0.514943	1.9071	0	0.0748262	0.397	5637	tags=38%, list=10%, signal=43%
GO_MODIFICATION_OF_SYNAPTIC_STRUCTURE	go_modification_of_synaptic_structure	GO_MODIFICATION_OF_SYNAPTIC_STRUCTURE	Details ...	24	0.667008	1.9041	0.00592885	0.0760016	0.405	6454	tags=71%, list=12%, signal=80%
GO_MEMBRANE_FISSION	go_membrane_fission	GO_MEMBRANE_FISSION	Details ...	15	0.720186	1.8998	0	0.0782406	0.413	2263	tags=40%, list=4%, signal=42%
GO_AMYLOID_BETA_FORMATION	go_amyloid_beta_formation	GO_AMYLOID_BETA_FORMATION	Details ...	39	0.605213	1.89883	0	0.0776932	0.418	5332	tags=54%, list=10%, signal=60%
GO_POSITIVE_REGULATION_OF_AMYLOID_PRECURSOR_PROTEIN_CATABOLIC_PROCESS	go_positive_regulation_of_amyloid_precursor_protein_catabolic_process	GO_POSITIVE_REGULATION_OF_AMYLOID_PRECURSOR_PROTEIN_CATABOLIC_PROCESS	Details ...	24	0.661421	1.898	0	0.0769241	0.419	4758	tags=46%, list=9%, signal=50%
GO_RAC_PROTEIN_SIGNAL_TRANSDUCTION	go_rac_protein_signal_transduction	GO_RAC_PROTEIN_SIGNAL_TRANSDUCTION	Details ...	38	0.645503	1.89452	0.00631579	0.079212	0.427	5258	tags=61%, list=10%, signal=67%
GO_CELLULAR_RESPONSE_TO_STEROL_DEPLETION	go_cellular_response_to_sterol_depletion	GO_CELLULAR_RESPONSE_TO_STEROL_DEPLETION	Details ...	15	0.74701	1.89247	0.00414079	0.07979	0.433	8032	tags=73%, list=15%, signal=86%
GO_MODIFICATION_OF_POSTSYNAPTIC_STRUCTURE	go_modification_of_postsynaptic_structure	GO_MODIFICATION_OF_POSTSYNAPTIC_STRUCTURE	Details ...	18	0.706855	1.89228	0.00398406	0.0783383	0.433	4383	tags=67%, list=8%, signal=72%
GO_AMYLOID_PRECURSOR_PROTEIN_CATABOLIC_PROCESS	go_amyloid_precursor_protein_catabolic_process	GO_AMYLOID_PRECURSOR_PROTEIN_CATABOLIC_PROCESS	Details ...	50	0.555414	1.89137	0.00204918	0.0777818	0.433	5332	tags=48%, list=10%, signal=53%
GO_APICAL_JUNCTION_ASSEMBLY	go_apical_junction_assembly	GO_APICAL_JUNCTION_ASSEMBLY	Details ...	85	0.540866	1.88798	0	0.0798846	0.445	5083	tags=40%, list=9%, signal=44%
GO_POSITIVE_REGULATION_OF_CELL_AGING	go_positive_regulation_of_cell_aging	GO_POSITIVE_REGULATION_OF_CELL_AGING	Details ...	17	0.699607	1.8869	0.00206186	0.0792632	0.448	7255	tags=47%, list=13%, signal=54%
GO_CELLULAR_RESPONSE_TO_IONIZING_RADIATION	go_cellular_response_to_ionizing_radiation	GO_CELLULAR_RESPONSE_TO_IONIZING_RADIATION	Details ...	67	0.579295	1.88689	0.00213675	0.0778654	0.448	3993	tags=42%, list=7%, signal=45%
GO_NEGATIVE_REGULATION_OF_RECEPTOR_SIGNALING_PATHWAY_VIA_JAK_STAT	go_negative_regulation_of_receptor_signaling_pathway_via_jak_stat	GO_NEGATIVE_REGULATION_OF_RECEPTOR_SIGNALING_PATHWAY_VIA_JAK_STAT	Details ...	24	0.643425	1.8843	0.00201207	0.0788951	0.454	3733	tags=33%, list=7%, signal=36%
GO_REGULATION_OF_ERBB_SIGNALING_PATHWAY	go_regulation_of_erbb_signaling_pathway	GO_REGULATION_OF_ERBB_SIGNALING_PATHWAY	Details ...	94	0.535443	1.88153	0	0.0798564	0.459	4475	tags=38%, list=8%, signal=42%
GO_ACTIVATION_OF_MAPKK_ACTIVITY	go_activation_of_mapkk_activity	GO_ACTIVATION_OF_MAPKK_ACTIVITY	Details ...	52	0.60439	1.88134	0.00402414	0.0786045	0.459	6859	tags=56%, list=12%, signal=64%
GO_RESPONSE_TO_DSRNA	go_response_to_dsrna	GO_RESPONSE_TO_DSRNA	Details ...	52	0.56132	1.88121	0.0020284	0.0773482	0.459	5424	tags=35%, list=10%, signal=38%
GO_EPHRIN_RECEPTOR_SIGNALING_PATHWAY	go_ephrin_receptor_signaling_pathway	GO_EPHRIN_RECEPTOR_SIGNALING_PATHWAY	Details ...	87	0.524496	1.87845	0.00603622	0.0786705	0.465	6680	tags=41%, list=12%, signal=47%
GO_DENDRITE_MORPHOGENESIS	go_dendrite_morphogenesis	GO_DENDRITE_MORPHOGENESIS	Details ...	145	0.553603	1.87804	0	0.0780451	0.467	4682	tags=39%, list=8%, signal=42%
GO_ERBB2_SIGNALING_PATHWAY	go_erbb2_signaling_pathway	GO_ERBB2_SIGNALING_PATHWAY	Details ...	32	0.618347	1.87167	0	0.0826168	0.479	4475	tags=47%, list=8%, signal=51%
GO_PROTEIN_LOCALIZATION_TO_LYSOSOME	go_protein_localization_to_lysosome	GO_PROTEIN_LOCALIZATION_TO_LYSOSOME	Details ...	42	0.588695	1.87107	0	0.0820095	0.481	3963	tags=38%, list=7%, signal=41%
GO_NEGATIVE_REGULATION_OF_TYROSINE_PHOSPHORYLATION_OF_STAT_PROTEIN	go_negative_regulation_of_tyrosine_phosphorylation_of_stat_protein	GO_NEGATIVE_REGULATION_OF_TYROSINE_PHOSPHORYLATION_OF_STAT_PROTEIN	Details ...	15	0.709004	1.86907	0.00399202	0.0827669	0.484	3155	tags=33%, list=6%, signal=35%
GO_INTERLEUKIN_6_MEDIATED_SIGNALING_PATHWAY	go_interleukin_6_mediated_signaling_pathway	GO_INTERLEUKIN_6_MEDIATED_SIGNALING_PATHWAY	Details ...	33	0.694628	1.86801	0.00628931	0.082665	0.487	3155	tags=36%, list=6%, signal=39%
GO_PEPTIDYL_THREONINE_MODIFICATION	go_peptidyl_threonine_modification	GO_PEPTIDYL_THREONINE_MODIFICATION	Details ...	124	0.551245	1.86738	0.00209644	0.0820071	0.491	6949	tags=49%, list=13%, signal=56%
GO_CERAMIDE_BIOSYNTHETIC_PROCESS	go_ceramide_biosynthetic_process	GO_CERAMIDE_BIOSYNTHETIC_PROCESS	Details ...	65	0.538657	1.86642	0.00421053	0.0819119	0.494	6812	tags=45%, list=12%, signal=51%
GO_ADHERENS_JUNCTION_ORGANIZATION	go_adherens_junction_organization	GO_ADHERENS_JUNCTION_ORGANIZATION	Details ...	67	0.570242	1.86595	0.00198807	0.0812918	0.495	5999	tags=39%, list=11%, signal=43%
GO_NEURAL_TUBE_FORMATION	go_neural_tube_formation	GO_NEURAL_TUBE_FORMATION	Details ...	106	0.561877	1.86519	0.0102459	0.0809696	0.5	6134	tags=47%, list=11%, signal=53%
GO_REGULATION_OF_NEURON_PROJECTION_REGENERATION	go_regulation_of_neuron_projection_regeneration	GO_REGULATION_OF_NEURON_PROJECTION_REGENERATION	Details ...	32	0.615383	1.86506	0.00399202	0.0799104	0.5	5192	tags=38%, list=9%, signal=41%
GO_REGULATION_OF_EXTRINSIC_APOPTOTIC_SIGNALING_PATHWAY_VIA_DEATH_DOMAIN_RECEPTORS	go_regulation_of_extrinsic_apoptotic_signaling_pathway_via_death_domain_receptors	GO_REGULATION_OF_EXTRINSIC_APOPTOTIC_SIGNALING_PATHWAY_VIA_DEATH_DOMAIN_RECEPTORS	Details ...	61	0.582622	1.86472	0.00205761	0.0792042	0.502	8572	tags=48%, list=16%, signal=56%
GO_VACUOLAR_TRANSPORT	go_vacuolar_transport	GO_VACUOLAR_TRANSPORT	Details ...	150	0.536459	1.86448	0.00410678	0.0785289	0.502	5258	tags=43%, list=10%, signal=48%
GO_POSITIVE_REGULATION_OF_AUTOPHAGY	go_positive_regulation_of_autophagy	GO_POSITIVE_REGULATION_OF_AUTOPHAGY	Details ...	129	0.560063	1.86427	0.00207039	0.0777089	0.502	5480	tags=45%, list=10%, signal=50%
GO_NEGATIVE_REGULATION_OF_ERBB_SIGNALING_PATHWAY	go_negative_regulation_of_erbb_signaling_pathway	GO_NEGATIVE_REGULATION_OF_ERBB_SIGNALING_PATHWAY	Details ...	52	0.574499	1.86378	0.0020202	0.0771002	0.502	4475	tags=48%, list=8%, signal=52%
GO_REGULATION_OF_POSTSYNAPSE_ORGANIZATION	go_regulation_of_postsynapse_organization	GO_REGULATION_OF_POSTSYNAPSE_ORGANIZATION	Details ...	107	0.526067	1.86372	0.00200803	0.0761248	0.502	5332	tags=36%, list=10%, signal=40%
GO_REGULATION_OF_EPIDERMAL_GROWTH_FACTOR_ACTIVATED_RECEPTOR_ACTIVITY	go_regulation_of_epidermal_growth_factor_activated_receptor_activity	GO_REGULATION_OF_EPIDERMAL_GROWTH_FACTOR_ACTIVATED_RECEPTOR_ACTIVITY	Details ...	30	0.62678	1.86114	0.00204499	0.0776079	0.513	4475	tags=43%, list=8%, signal=47%
GO_NEURON_PROJECTION_ORGANIZATION	go_neuron_projection_organization	GO_NEURON_PROJECTION_ORGANIZATION	Details ...	92	0.552808	1.86011	0	0.0773419	0.515	6056	tags=42%, list=11%, signal=48%
GO_CELL_AGING	go_cell_aging	GO_CELL_AGING	Details ...	108	0.507055	1.85762	0.00207039	0.0785941	0.523	5886	tags=38%, list=11%, signal=42%
GO_MITOTIC_G2_DNA_DAMAGE_CHECKPOINT	go_mitotic_g2_dna_damage_checkpoint	GO_MITOTIC_G2_DNA_DAMAGE_CHECKPOINT	Details ...	23	0.695672	1.85736	0.00205339	0.0777692	0.524	6030	tags=52%, list=11%, signal=59%
GO_POSITIVE_REGULATION_OF_POSTTRANSCRIPTIONAL_GENE_SILENCING	go_positive_regulation_of_posttranscriptional_gene_silencing	GO_POSITIVE_REGULATION_OF_POSTTRANSCRIPTIONAL_GENE_SILENCING	Details ...	25	0.694409	1.85523	0.00197628	0.0789354	0.529	4935	tags=56%, list=9%, signal=61%
GO_VIRAL_RNA_GENOME_REPLICATION	go_viral_rna_genome_replication	GO_VIRAL_RNA_GENOME_REPLICATION	Details ...	33	0.62245	1.85497	0.00628931	0.0783167	0.529	8764	tags=48%, list=16%, signal=58%
GO_REGULATION_OF_CELLULAR_COMPONENT_SIZE	go_regulation_of_cellular_component_size	GO_REGULATION_OF_CELLULAR_COMPONENT_SIZE	Details ...	377	0.466038	1.85206	0	0.0798098	0.536	5729	tags=36%, list=10%, signal=40%
GO_NEGATIVE_REGULATION_OF_ACTIN_FILAMENT_BUNDLE_ASSEMBLY	go_negative_regulation_of_actin_filament_bundle_assembly	GO_NEGATIVE_REGULATION_OF_ACTIN_FILAMENT_BUNDLE_ASSEMBLY	Details ...	32	0.602542	1.84991	0.00391389	0.0808442	0.544	2446	tags=41%, list=4%, signal=42%
GO_POSITIVE_REGULATION_OF_NUCLEOCYTOPLASMIC_TRANSPORT	go_positive_regulation_of_nucleocytoplasmic_transport	GO_POSITIVE_REGULATION_OF_NUCLEOCYTOPLASMIC_TRANSPORT	Details ...	66	0.562754	1.84851	0.00614754	0.0810591	0.546	7756	tags=52%, list=14%, signal=60%
GO_NEGATIVE_REGULATION_OF_CELL_PROJECTION_ORGANIZATION	go_negative_regulation_of_cell_projection_organization	GO_NEGATIVE_REGULATION_OF_CELL_PROJECTION_ORGANIZATION	Details ...	184	0.483529	1.84667	0.0020284	0.0820043	0.549	5886	tags=39%, list=11%, signal=43%
GO_CEREBRAL_CORTEX_CELL_MIGRATION	go_cerebral_cortex_cell_migration	GO_CEREBRAL_CORTEX_CELL_MIGRATION	Details ...	41	0.607491	1.84586	0.0020202	0.081955	0.549	5288	tags=44%, list=10%, signal=49%
GO_REGULATION_OF_HISTONE_METHYLATION	go_regulation_of_histone_methylation	GO_REGULATION_OF_HISTONE_METHYLATION	Details ...	64	0.621373	1.84536	0.00198807	0.0815655	0.551	6474	tags=47%, list=12%, signal=53%
GO_ENDOSOME_TO_LYSOSOME_TRANSPORT	go_endosome_to_lysosome_transport	GO_ENDOSOME_TO_LYSOSOME_TRANSPORT	Details ...	53	0.609236	1.84495	0.00417537	0.0809898	0.552	4543	tags=51%, list=8%, signal=55%
GO_HISTONE_H3_K27_METHYLATION	go_histone_h3_k27_methylation	GO_HISTONE_H3_K27_METHYLATION	Details ...	16	0.748575	1.84397	0	0.0810073	0.553	3633	tags=44%, list=7%, signal=47%
GO_NEURON_PROJECTION_EXTENSION_INVOLVED_IN_NEURON_PROJECTION_GUIDANCE	go_neuron_projection_extension_involved_in_neuron_projection_guidance	GO_NEURON_PROJECTION_EXTENSION_INVOLVED_IN_NEURON_PROJECTION_GUIDANCE	Details ...	37	0.622657	1.84377	0.00608519	0.0802456	0.553	5637	tags=54%, list=10%, signal=60%
GO_SYMPATHETIC_NERVOUS_SYSTEM_DEVELOPMENT	go_sympathetic_nervous_system_development	GO_SYMPATHETIC_NERVOUS_SYSTEM_DEVELOPMENT	Details ...	21	0.652581	1.84351	0.00808081	0.0795305	0.553	5637	tags=33%, list=10%, signal=37%
GO_POSITIVE_REGULATION_OF_AMYLOID_BETA_FORMATION	go_positive_regulation_of_amyloid_beta_formation	GO_POSITIVE_REGULATION_OF_AMYLOID_BETA_FORMATION	Details ...	20	0.672831	1.84307	0.00824742	0.0791493	0.553	4758	tags=50%, list=9%, signal=55%
GO_NEGATIVE_REGULATION_OF_AXONOGENESIS	go_negative_regulation_of_axonogenesis	GO_NEGATIVE_REGULATION_OF_AXONOGENESIS	Details ...	70	0.546551	1.84058	0	0.0807747	0.563	5420	tags=40%, list=10%, signal=44%
GO_NEGATIVE_REGULATION_OF_SUPRAMOLECULAR_FIBER_ORGANIZATION	go_negative_regulation_of_supramolecular_fiber_organization	GO_NEGATIVE_REGULATION_OF_SUPRAMOLECULAR_FIBER_ORGANIZATION	Details ...	148	0.492949	1.84044	0	0.0801041	0.564	5443	tags=35%, list=10%, signal=39%
GO_G0_TO_G1_TRANSITION	go_g0_to_g1_transition	GO_G0_TO_G1_TRANSITION	Details ...	44	0.631711	1.83973	0	0.080071	0.564	8135	tags=55%, list=15%, signal=64%
GO_POSITIVE_REGULATION_OF_CELL_PROJECTION_ORGANIZATION	go_positive_regulation_of_cell_projection_organization	GO_POSITIVE_REGULATION_OF_CELL_PROJECTION_ORGANIZATION	Details ...	391	0.478427	1.83884	0	0.0799793	0.567	5908	tags=37%, list=11%, signal=41%
GO_DENDRITIC_SPINE_DEVELOPMENT	go_dendritic_spine_development	GO_DENDRITIC_SPINE_DEVELOPMENT	Details ...	102	0.565415	1.83834	0.002	0.0797443	0.57	6829	tags=47%, list=12%, signal=54%
GO_POSITIVE_REGULATION_OF_MACROAUTOPHAGY	go_positive_regulation_of_macroautophagy	GO_POSITIVE_REGULATION_OF_MACROAUTOPHAGY	Details ...	66	0.605047	1.83525	0.00205761	0.0816234	0.579	5001	tags=47%, list=9%, signal=52%
GO_ACTIN_FILAMENT_BASED_TRANSPORT	go_actin_filament_based_transport	GO_ACTIN_FILAMENT_BASED_TRANSPORT	Details ...	21	0.704028	1.8343	0.00204082	0.081739	0.582	6063	tags=62%, list=11%, signal=70%
GO_POSITIVE_REGULATION_OF_CELL_CYCLE_G1_S_PHASE_TRANSITION	go_positive_regulation_of_cell_cycle_g1_s_phase_transition	GO_POSITIVE_REGULATION_OF_CELL_CYCLE_G1_S_PHASE_TRANSITION		58	0.542514	1.83407	0.00205761	0.0810771	0.582	5026	tags=31%, list=9%, signal=34%
GO_SEMAPHORIN_PLEXIN_SIGNALING_PATHWAY	go_semaphorin_plexin_signaling_pathway	GO_SEMAPHORIN_PLEXIN_SIGNALING_PATHWAY		40	0.593991	1.8327	0.00583658	0.0814734	0.586	5637	tags=48%, list=10%, signal=53%
GO_POSITIVE_REGULATION_OF_HISTONE_METHYLATION	go_positive_regulation_of_histone_methylation	GO_POSITIVE_REGULATION_OF_HISTONE_METHYLATION		40	0.627347	1.83202	0.0019802	0.0812114	0.588	7529	tags=50%, list=14%, signal=58%
GO_GLUCOSAMINE_CONTAINING_COMPOUND_METABOLIC_PROCESS	go_glucosamine_containing_compound_metabolic_process	GO_GLUCOSAMINE_CONTAINING_COMPOUND_METABOLIC_PROCESS		26	0.565513	1.8294	0.0040568	0.0827242	0.593	5697	tags=38%, list=10%, signal=43%
GO_POSITIVE_REGULATION_OF_NEURON_MIGRATION	go_positive_regulation_of_neuron_migration	GO_POSITIVE_REGULATION_OF_NEURON_MIGRATION		16	0.743948	1.82754	0.00402414	0.0835525	0.597	5685	tags=69%, list=10%, signal=77%
GO_CELL_CYCLE_G1_S_PHASE_TRANSITION	go_cell_cycle_g1_s_phase_transition	GO_CELL_CYCLE_G1_S_PHASE_TRANSITION		298	0.501618	1.82668	0	0.0834051	0.601	5701	tags=36%, list=10%, signal=39%
GO_NEGATIVE_REGULATION_OF_NEURON_PROJECTION_DEVELOPMENT	go_negative_regulation_of_neuron_projection_development	GO_NEGATIVE_REGULATION_OF_NEURON_PROJECTION_DEVELOPMENT		152	0.491692	1.82576	0.0020202	0.0834677	0.606	5701	tags=39%, list=10%, signal=43%
GO_RESPONSE_TO_PLATELET_DERIVED_GROWTH_FACTOR	go_response_to_platelet_derived_growth_factor	GO_RESPONSE_TO_PLATELET_DERIVED_GROWTH_FACTOR		21	0.675041	1.82504	0.00817996	0.0833274	0.606	6515	tags=48%, list=12%, signal=54%
GO_REGULATION_OF_PROTEIN_POLYMERIZATION	go_regulation_of_protein_polymerization	GO_REGULATION_OF_PROTEIN_POLYMERIZATION		226	0.467333	1.82438	0.00200803	0.0830842	0.607	5956	tags=38%, list=11%, signal=42%
GO_NEGATIVE_REGULATION_OF_CYTOSKELETON_ORGANIZATION	go_negative_regulation_of_cytoskeleton_organization	GO_NEGATIVE_REGULATION_OF_CYTOSKELETON_ORGANIZATION		156	0.491046	1.82354	0	0.0830571	0.609	5443	tags=35%, list=10%, signal=38%
GO_REGULATION_OF_TELOMERE_MAINTENANCE	go_regulation_of_telomere_maintenance	GO_REGULATION_OF_TELOMERE_MAINTENANCE		80	0.615912	1.82295	0.00650759	0.0827566	0.612	5764	tags=49%, list=10%, signal=54%
GO_CELLULAR_PROTEIN_CONTAINING_COMPLEX_LOCALIZATION	go_cellular_protein_containing_complex_localization	GO_CELLULAR_PROTEIN_CONTAINING_COMPLEX_LOCALIZATION		25	0.661723	1.82225	0.0083682	0.0825998	0.612	6730	tags=60%, list=12%, signal=68%
GO_REGULATION_OF_ACTIN_FILAMENT_ORGANIZATION	go_regulation_of_actin_filament_organization	GO_REGULATION_OF_ACTIN_FILAMENT_ORGANIZATION		270	0.47448	1.82125	0.00203252	0.0826542	0.613	5956	tags=38%, list=11%, signal=43%
GO_POSITIVE_REGULATION_OF_PLASMA_MEMBRANE_BOUNDED_CELL_PROJECTION_ASSEMBLY	go_positive_regulation_of_plasma_membrane_bounded_cell_projection_assembly	GO_POSITIVE_REGULATION_OF_PLASMA_MEMBRANE_BOUNDED_CELL_PROJECTION_ASSEMBLY		102	0.503006	1.8199	0	0.0829804	0.617	5729	tags=42%, list=10%, signal=47%
GO_NEGATIVE_REGULATION_OF_PROTEIN_CONTAINING_COMPLEX_DISASSEMBLY	go_negative_regulation_of_protein_containing_complex_disassembly	GO_NEGATIVE_REGULATION_OF_PROTEIN_CONTAINING_COMPLEX_DISASSEMBLY		79	0.54913	1.81906	0	0.0828769	0.618	4904	tags=34%, list=9%, signal=37%
GO_REGULATION_OF_SISTER_CHROMATID_COHESION	go_regulation_of_sister_chromatid_cohesion	GO_REGULATION_OF_SISTER_CHROMATID_COHESION		21	0.722526	1.81814	0.0020202	0.0829909	0.621	4836	tags=62%, list=9%, signal=68%
GO_NEGATIVE_REGULATION_OF_MACROAUTOPHAGY	go_negative_regulation_of_macroautophagy	GO_NEGATIVE_REGULATION_OF_MACROAUTOPHAGY		34	0.601153	1.81614	0	0.0840491	0.622	5487	tags=47%, list=10%, signal=52%
GO_CELL_CELL_JUNCTION_ORGANIZATION	go_cell_cell_junction_organization	GO_CELL_CELL_JUNCTION_ORGANIZATION		210	0.481961	1.81546	0.00403226	0.0839549	0.623	5513	tags=33%, list=10%, signal=37%
GO_NEGATIVE_REGULATION_OF_ACTIN_FILAMENT_POLYMERIZATION	go_negative_regulation_of_actin_filament_polymerization	GO_NEGATIVE_REGULATION_OF_ACTIN_FILAMENT_POLYMERIZATION		62	0.513868	1.81476	0	0.0838085	0.625	2144	tags=27%, list=4%, signal=28%
GO_HISTONE_H2A_UBIQUITINATION	go_histone_h2a_ubiquitination	GO_HISTONE_H2A_UBIQUITINATION		26	0.656169	1.81473	0.00407332	0.0831238	0.625	4177	tags=54%, list=8%, signal=58%
GO_PEPTIDE_CATABOLIC_PROCESS	go_peptide_catabolic_process	GO_PEPTIDE_CATABOLIC_PROCESS		30	0.555033	1.81433	0.00389864	0.0828218	0.626	3391	tags=33%, list=6%, signal=35%
GO_NEGATIVE_REGULATION_OF_RESPONSE_TO_OXIDATIVE_STRESS	go_negative_regulation_of_response_to_oxidative_stress	GO_NEGATIVE_REGULATION_OF_RESPONSE_TO_OXIDATIVE_STRESS		48	0.519529	1.81432	0	0.0821495	0.626	3310	tags=29%, list=6%, signal=31%
GO_PHOSPHOLIPID_DEPHOSPHORYLATION	go_phospholipid_dephosphorylation	GO_PHOSPHOLIPID_DEPHOSPHORYLATION		45	0.599283	1.81429	0.00208333	0.081495	0.626	6829	tags=51%, list=12%, signal=58%
GO_POSITIVE_REGULATION_OF_ENDOCYTOSIS	go_positive_regulation_of_endocytosis	GO_POSITIVE_REGULATION_OF_ENDOCYTOSIS		99	0.497775	1.8134	0.00207469	0.0816409	0.628	6479	tags=41%, list=12%, signal=47%
GO_RNA_DEPENDENT_DNA_BIOSYNTHETIC_PROCESS	go_rna_dependent_dna_biosynthetic_process	GO_RNA_DEPENDENT_DNA_BIOSYNTHETIC_PROCESS		71	0.612035	1.81216	0.0125786	0.0820706	0.632	5764	tags=52%, list=10%, signal=58%
GO_NEGATIVE_REGULATION_OF_ACTIN_FILAMENT_DEPOLYMERIZATION	go_negative_regulation_of_actin_filament_depolymerization	GO_NEGATIVE_REGULATION_OF_ACTIN_FILAMENT_DEPOLYMERIZATION		43	0.566128	1.81054	0	0.0827815	0.639	3369	tags=33%, list=6%, signal=35%
GO_REGULATION_OF_PROTEIN_LOCALIZATION_TO_CELL_SURFACE	go_regulation_of_protein_localization_to_cell_surface	GO_REGULATION_OF_PROTEIN_LOCALIZATION_TO_CELL_SURFACE		41	0.543495	1.81012	0.00416667	0.0825798	0.64	5475	tags=37%, list=10%, signal=41%
GO_SISTER_CHROMATID_COHESION	go_sister_chromatid_cohesion	GO_SISTER_CHROMATID_COHESION		62	0.617188	1.80886	0	0.0829958	0.643	5311	tags=47%, list=10%, signal=52%
GO_DOSAGE_COMPENSATION	go_dosage_compensation	GO_DOSAGE_COMPENSATION		17	0.7267	1.80883	0	0.0823742	0.643	8765	tags=76%, list=16%, signal=91%
GO_BETA_CATENIN_DESTRUCTION_COMPLEX_DISASSEMBLY	go_beta_catenin_destruction_complex_disassembly	GO_BETA_CATENIN_DESTRUCTION_COMPLEX_DISASSEMBLY		21	0.628377	1.80811	0.00583658	0.0822459	0.643	6020	tags=48%, list=11%, signal=53%
GO_RESPONSE_TO_ANGIOTENSIN	go_response_to_angiotensin	GO_RESPONSE_TO_ANGIOTENSIN		27	0.612606	1.80798	0.00431035	0.081718	0.644	7902	tags=44%, list=14%, signal=52%
GO_MEMBRANE_PROTEIN_INTRACELLULAR_DOMAIN_PROTEOLYSIS	go_membrane_protein_intracellular_domain_proteolysis	GO_MEMBRANE_PROTEIN_INTRACELLULAR_DOMAIN_PROTEOLYSIS		18	0.699723	1.8079	0.00598802	0.0811947	0.644	5429	tags=72%, list=10%, signal=80%
GO_VESICLE_MEDIATED_TRANSPORT_TO_THE_PLASMA_MEMBRANE	go_vesicle_mediated_transport_to_the_plasma_membrane	GO_VESICLE_MEDIATED_TRANSPORT_TO_THE_PLASMA_MEMBRANE		93	0.543955	1.80722	0	0.0811765	0.646	5624	tags=44%, list=10%, signal=49%
GO_PROTEIN_LOCALIZATION_TO_ENDOSOME	go_protein_localization_to_endosome	GO_PROTEIN_LOCALIZATION_TO_ENDOSOME		25	0.688512	1.80721	0.00610998	0.0805818	0.646	5017	tags=56%, list=9%, signal=62%
GO_MEMBRANE_PROTEIN_ECTODOMAIN_PROTEOLYSIS	go_membrane_protein_ectodomain_proteolysis	GO_MEMBRANE_PROTEIN_ECTODOMAIN_PROTEOLYSIS		42	0.593328	1.80671	0.00608519	0.0803619	0.647	7773	tags=57%, list=14%, signal=66%
GO_REGULATION_OF_PROTEIN_CATABOLIC_PROCESS	go_regulation_of_protein_catabolic_process	GO_REGULATION_OF_PROTEIN_CATABOLIC_PROCESS		393	0.462346	1.80643	0.00204918	0.0799869	0.647	5372	tags=35%, list=10%, signal=39%
GO_NEGATIVE_REGULATION_OF_PROTEIN_CONTAINING_COMPLEX_ASSEMBLY	go_negative_regulation_of_protein_containing_complex_assembly	GO_NEGATIVE_REGULATION_OF_PROTEIN_CONTAINING_COMPLEX_ASSEMBLY		137	0.463499	1.80572	0	0.0800358	0.648	4530	tags=31%, list=8%, signal=33%
GO_MEMBRANE_PROTEIN_PROTEOLYSIS	go_membrane_protein_proteolysis	GO_MEMBRANE_PROTEIN_PROTEOLYSIS		61	0.555053	1.80496	0.00622407	0.0800457	0.649	5929	tags=49%, list=11%, signal=55%
GO_MITOTIC_G2_M_TRANSITION_CHECKPOINT	go_mitotic_g2_m_transition_checkpoint	GO_MITOTIC_G2_M_TRANSITION_CHECKPOINT		31	0.648141	1.80402	0.00607288	0.0804288	0.652	6030	tags=42%, list=11%, signal=47%
GO_REGULATION_OF_OXIDATIVE_STRESS_INDUCED_CELL_DEATH	go_regulation_of_oxidative_stress_induced_cell_death	GO_REGULATION_OF_OXIDATIVE_STRESS_INDUCED_CELL_DEATH		64	0.501632	1.80373	0.00211864	0.0801591	0.654	4787	tags=34%, list=9%, signal=38%
GO_NEGATIVE_REGULATION_OF_TELOMERE_MAINTENANCE	go_negative_regulation_of_telomere_maintenance	GO_NEGATIVE_REGULATION_OF_TELOMERE_MAINTENANCE		36	0.665127	1.80271	0.010352	0.080323	0.654	5365	tags=58%, list=10%, signal=65%
GO_MODULATION_BY_HOST_OF_SYMBIONT_PROCESS	go_modulation_by_host_of_symbiont_process	GO_MODULATION_BY_HOST_OF_SYMBIONT_PROCESS		62	0.521246	1.80264	0	0.0797879	0.654	6044	tags=44%, list=11%, signal=49%
GO_FIBROBLAST_GROWTH_FACTOR_RECEPTOR_SIGNALING_PATHWAY	go_fibroblast_growth_factor_receptor_signaling_pathway	GO_FIBROBLAST_GROWTH_FACTOR_RECEPTOR_SIGNALING_PATHWAY		114	0.498468	1.80211	0.00603622	0.0795939	0.655	5452	tags=33%, list=10%, signal=37%
GO_POST_GOLGI_VESICLE_MEDIATED_TRANSPORT	go_post_golgi_vesicle_mediated_transport	GO_POST_GOLGI_VESICLE_MEDIATED_TRANSPORT		104	0.573923	1.79932	0.00207469	0.081534	0.664	5624	tags=45%, list=10%, signal=50%
GO_POSITIVE_REGULATION_OF_NEURON_PROJECTION_DEVELOPMENT	go_positive_regulation_of_neuron_projection_development	GO_POSITIVE_REGULATION_OF_NEURON_PROJECTION_DEVELOPMENT		290	0.476879	1.79854	0	0.0816171	0.665	5700	tags=36%, list=10%, signal=39%
GO_POSITIVE_REGULATION_OF_MITOTIC_CELL_CYCLE	go_positive_regulation_of_mitotic_cell_cycle	GO_POSITIVE_REGULATION_OF_MITOTIC_CELL_CYCLE		165	0.500774	1.79776	0	0.0815936	0.667	5473	tags=35%, list=10%, signal=38%
GO_ESTABLISHMENT_OF_ENDOTHELIAL_BARRIER	go_establishment_of_endothelial_barrier	GO_ESTABLISHMENT_OF_ENDOTHELIAL_BARRIER		46	0.589294	1.79706	0.00757576	0.0816819	0.672	3219	tags=35%, list=6%, signal=37%
GO_LENS_MORPHOGENESIS_IN_CAMERA_TYPE_EYE	go_lens_morphogenesis_in_camera_type_eye	GO_LENS_MORPHOGENESIS_IN_CAMERA_TYPE_EYE		22	0.613681	1.79683	0.00588235	0.0813786	0.673	7519	tags=50%, list=14%, signal=58%
GO_DENDRITE_DEVELOPMENT	go_dendrite_development	GO_DENDRITE_DEVELOPMENT		246	0.50398	1.79655	0.00205339	0.081141	0.675	5914	tags=40%, list=11%, signal=44%
GO_PINOCYTOSIS	go_pinocytosis	GO_PINOCYTOSIS		23	0.637341	1.79616	0.00829876	0.0809393	0.675	4658	tags=52%, list=8%, signal=57%
GO_REGULATION_OF_GENE_SILENCING	go_regulation_of_gene_silencing	GO_REGULATION_OF_GENE_SILENCING		99	0.562969	1.79441	0.00803213	0.0820655	0.678	6688	tags=49%, list=12%, signal=56%
GO_REGULATION_OF_PEPTIDYL_THREONINE_PHOSPHORYLATION	go_regulation_of_peptidyl_threonine_phosphorylation	GO_REGULATION_OF_PEPTIDYL_THREONINE_PHOSPHORYLATION		47	0.547844	1.79422	0.00409836	0.0816594	0.679	3338	tags=36%, list=6%, signal=38%
GO_REGULATION_OF_BICELLULAR_TIGHT_JUNCTION_ASSEMBLY	go_regulation_of_bicellular_tight_junction_assembly	GO_REGULATION_OF_BICELLULAR_TIGHT_JUNCTION_ASSEMBLY		23	0.638959	1.79382	0.00622407	0.0814912	0.679	4357	tags=43%, list=8%, signal=47%
GO_CHROMATIN_REMODELING	go_chromatin_remodeling	GO_CHROMATIN_REMODELING		185	0.542225	1.79294	0.00831601	0.0816723	0.686	5305	tags=42%, list=10%, signal=46%
GO_POSITIVE_REGULATION_OF_MRNA_METABOLIC_PROCESS	go_positive_regulation_of_mrna_metabolic_process	GO_POSITIVE_REGULATION_OF_MRNA_METABOLIC_PROCESS		82	0.569397	1.7929	0.00609756	0.081211	0.686	6044	tags=43%, list=11%, signal=48%
GO_ALTERNATIVE_MRNA_SPLICING_VIA_SPLICEOSOME	go_alternative_mrna_splicing_via_spliceosome	GO_ALTERNATIVE_MRNA_SPLICING_VIA_SPLICEOSOME		87	0.620416	1.79286	0.00604839	0.0807462	0.686	8065	tags=52%, list=15%, signal=60%
GO_TELOMERE_CAPPING	go_telomere_capping	GO_TELOMERE_CAPPING		40	0.628625	1.79257	0.01222	0.0804769	0.687	5546	tags=48%, list=10%, signal=53%
GO_REGULATION_OF_SYNAPSE_STRUCTURE_OR_ACTIVITY	go_regulation_of_synapse_structure_or_activity	GO_REGULATION_OF_SYNAPSE_STRUCTURE_OR_ACTIVITY		239	0.468076	1.79256	0.00207039	0.0799792	0.687	5475	tags=32%, list=10%, signal=36%
GO_POSITIVE_REGULATION_OF_AXON_EXTENSION	go_positive_regulation_of_axon_extension	GO_POSITIVE_REGULATION_OF_AXON_EXTENSION		43	0.585133	1.79199	0.0100604	0.079893	0.687	7009	tags=49%, list=13%, signal=56%
GO_O_GLYCAN_PROCESSING	go_o_glycan_processing	GO_O_GLYCAN_PROCESSING		60	0.513165	1.79158	0.00205339	0.0797041	0.687	3095	tags=23%, list=6%, signal=25%
GO_SPHINGOLIPID_METABOLIC_PROCESS	go_sphingolipid_metabolic_process	GO_SPHINGOLIPID_METABOLIC_PROCESS		160	0.461812	1.79149	0.00209205	0.0793102	0.687	7029	tags=41%, list=13%, signal=46%
GO_POSITIVE_REGULATION_OF_PROTEIN_POLYMERIZATION	go_positive_regulation_of_protein_polymerization	GO_POSITIVE_REGULATION_OF_PROTEIN_POLYMERIZATION		136	0.484048	1.79115	0.00604839	0.0790925	0.687	5956	tags=43%, list=11%, signal=48%
GO_HETEROCHROMATIN_ORGANIZATION	go_heterochromatin_organization	GO_HETEROCHROMATIN_ORGANIZATION		49	0.597726	1.79073	0.013834	0.0789856	0.687	4401	tags=51%, list=8%, signal=55%
GO_REGULATION_OF_AMYLOID_BETA_FORMATION	go_regulation_of_amyloid_beta_formation	GO_REGULATION_OF_AMYLOID_BETA_FORMATION		33	0.576703	1.78985	0.00204918	0.0791488	0.688	5332	tags=48%, list=10%, signal=54%
GO_CENTRAL_NERVOUS_SYSTEM_NEURON_AXONOGENESIS	go_central_nervous_system_neuron_axonogenesis	GO_CENTRAL_NERVOUS_SYSTEM_NEURON_AXONOGENESIS		36	0.591431	1.78912	0	0.0791981	0.688	5637	tags=44%, list=10%, signal=49%
GO_POSITIVE_REGULATION_OF_GLIAL_CELL_PROLIFERATION	go_positive_regulation_of_glial_cell_proliferation	GO_POSITIVE_REGULATION_OF_GLIAL_CELL_PROLIFERATION		19	0.649667	1.78869	0.00211416	0.0790163	0.688	5487	tags=42%, list=10%, signal=47%
GO_MITOTIC_SPINDLE_ASSEMBLY	go_mitotic_spindle_assembly	GO_MITOTIC_SPINDLE_ASSEMBLY		65	0.60203	1.78826	0.0105485	0.0789556	0.688	8276	tags=54%, list=15%, signal=63%
GO_ESTABLISHMENT_OF_CELL_POLARITY	go_establishment_of_cell_polarity	GO_ESTABLISHMENT_OF_CELL_POLARITY		140	0.51884	1.78738	0.0140562	0.0792498	0.689	3897	tags=35%, list=7%, signal=38%
GO_NEGATIVE_REGULATION_OF_DNA_REPAIR	go_negative_regulation_of_dna_repair	GO_NEGATIVE_REGULATION_OF_DNA_REPAIR		35	0.595801	1.78676	0.012	0.0793864	0.691	7103	tags=49%, list=13%, signal=56%
GO_POSITIVE_REGULATION_OF_PROTEIN_CATABOLIC_PROCESS	go_positive_regulation_of_protein_catabolic_process	GO_POSITIVE_REGULATION_OF_PROTEIN_CATABOLIC_PROCESS		224	0.460162	1.78607	0	0.0794884	0.694	5480	tags=37%, list=10%, signal=41%
GO_CONNECTIVE_TISSUE_REPLACEMENT	go_connective_tissue_replacement	GO_CONNECTIVE_TISSUE_REPLACEMENT		16	0.677144	1.7859	0.00819672	0.0791656	0.694	3304	tags=25%, list=6%, signal=27%
GO_REGULATION_OF_CELL_AGING	go_regulation_of_cell_aging	GO_REGULATION_OF_CELL_AGING		53	0.532249	1.78564	0.00817996	0.0788834	0.694	7255	tags=38%, list=13%, signal=43%
GO_PROTEIN_DESTABILIZATION	go_protein_destabilization	GO_PROTEIN_DESTABILIZATION		50	0.563979	1.78556	0.00622407	0.0784919	0.694	4866	tags=42%, list=9%, signal=46%
GO_DNA_REPLICATION_INITIATION	go_dna_replication_initiation	GO_DNA_REPLICATION_INITIATION		39	0.670494	1.78523	0.0104167	0.0783008	0.694	8982	tags=64%, list=16%, signal=76%
GO_PROTEIN_LOCALIZATION_TO_CELL_SURFACE	go_protein_localization_to_cell_surface	GO_PROTEIN_LOCALIZATION_TO_CELL_SURFACE		66	0.503487	1.78516	0.00209644	0.0779163	0.694	5555	tags=36%, list=10%, signal=40%
GO_TELOMERE_MAINTENANCE_VIA_TELOMERE_LENGTHENING	go_telomere_maintenance_via_telomere_lengthening	GO_TELOMERE_MAINTENANCE_VIA_TELOMERE_LENGTHENING		81	0.591079	1.78452	0.0127119	0.077997	0.697	6437	tags=51%, list=12%, signal=57%
GO_HISTONE_H3_ACETYLATION	go_histone_h3_acetylation	GO_HISTONE_H3_ACETYLATION		60	0.583029	1.78407	0.00409836	0.0778621	0.698	5473	tags=42%, list=10%, signal=46%
GO_NEGATIVE_REGULATION_OF_GENE_SILENCING	go_negative_regulation_of_gene_silencing	GO_NEGATIVE_REGULATION_OF_GENE_SILENCING		26	0.60694	1.78281	0.00208333	0.0783361	0.699	6548	tags=46%, list=12%, signal=52%
GO_SUBSTRATE_ADHESION_DEPENDENT_CELL_SPREADING	go_substrate_adhesion_dependent_cell_spreading	GO_SUBSTRATE_ADHESION_DEPENDENT_CELL_SPREADING		106	0.519137	1.78265	0.0103734	0.078095	0.699	3897	tags=36%, list=7%, signal=38%
GO_POSITIVE_REGULATION_OF_DNA_TEMPLATED_TRANSCRIPTION_ELONGATION	go_positive_regulation_of_dna_templated_transcription_elongation	GO_POSITIVE_REGULATION_OF_DNA_TEMPLATED_TRANSCRIPTION_ELONGATION		27	0.687643	1.78264	0.00622407	0.0776696	0.699	8316	tags=67%, list=15%, signal=78%
GO_AXONAL_FASCICULATION	go_axonal_fasciculation	GO_AXONAL_FASCICULATION		23	0.624625	1.78233	0.010142	0.077486	0.7	6689	tags=52%, list=12%, signal=59%
GO_REGULATION_OF_SUPRAMOLECULAR_FIBER_ORGANIZATION	go_regulation_of_supramolecular_fiber_organization	GO_REGULATION_OF_SUPRAMOLECULAR_FIBER_ORGANIZATION		361	0.452666	1.78228	0.00406504	0.0771252	0.701	5956	tags=37%, list=11%, signal=41%
GO_REGULATION_OF_DENDRITIC_SPINE_DEVELOPMENT	go_regulation_of_dendritic_spine_development	GO_REGULATION_OF_DENDRITIC_SPINE_DEVELOPMENT		78	0.55823	1.78207	0.00400802	0.0768489	0.702	6829	tags=46%, list=12%, signal=53%
GO_POSITIVE_REGULATION_OF_PROTEIN_LOCALIZATION_TO_MEMBRANE	go_positive_regulation_of_protein_localization_to_membrane	GO_POSITIVE_REGULATION_OF_PROTEIN_LOCALIZATION_TO_MEMBRANE		126	0.462813	1.78151	0	0.0768186	0.702	4780	tags=31%, list=9%, signal=34%
GO_REGULATION_OF_TELOMERE_MAINTENANCE_VIA_TELOMERE_LENGTHENING	go_regulation_of_telomere_maintenance_via_telomere_lengthening	GO_REGULATION_OF_TELOMERE_MAINTENANCE_VIA_TELOMERE_LENGTHENING		61	0.61793	1.78112	0.0150215	0.0767602	0.703	5764	tags=49%, list=10%, signal=55%
GO_RESPONSE_TO_IONIZING_RADIATION	go_response_to_ionizing_radiation	GO_RESPONSE_TO_IONIZING_RADIATION		142	0.523572	1.78066	0.0128205	0.0766951	0.703	6280	tags=43%, list=11%, signal=48%
GO_NEGATIVE_REGULATION_OF_FATTY_ACID_BIOSYNTHETIC_PROCESS	go_negative_regulation_of_fatty_acid_biosynthetic_process	GO_NEGATIVE_REGULATION_OF_FATTY_ACID_BIOSYNTHETIC_PROCESS		21	0.599578	1.77921	0.0020202	0.0774531	0.705	8032	tags=33%, list=15%, signal=39%
GO_ESTABLISHMENT_OF_SPINDLE_ORIENTATION	go_establishment_of_spindle_orientation	GO_ESTABLISHMENT_OF_SPINDLE_ORIENTATION		36	0.60693	1.77835	0.00819672	0.0777385	0.71	5782	tags=47%, list=10%, signal=53%
GO_NEGATIVE_REGULATION_OF_I_KAPPAB_KINASE_NF_KAPPAB_SIGNALING	go_negative_regulation_of_i_kappab_kinase_nf_kappab_signaling	GO_NEGATIVE_REGULATION_OF_I_KAPPAB_KINASE_NF_KAPPAB_SIGNALING		50	0.554281	1.77817	0	0.0775011	0.71	4819	tags=36%, list=9%, signal=39%
GO_REGULATION_OF_RAS_PROTEIN_SIGNAL_TRANSDUCTION	go_regulation_of_ras_protein_signal_transduction	GO_REGULATION_OF_RAS_PROTEIN_SIGNAL_TRANSDUCTION		194	0.49464	1.77792	0.00803213	0.0772583	0.71	6090	tags=38%, list=11%, signal=43%
GO_CELL_CELL_ADHESION_VIA_PLASMA_MEMBRANE_ADHESION_MOLECULES	go_cell_cell_adhesion_via_plasma_membrane_adhesion_molecules	GO_CELL_CELL_ADHESION_VIA_PLASMA_MEMBRANE_ADHESION_MOLECULES		277	0.475197	1.77751	0.010142	0.0772263	0.712	7719	tags=34%, list=14%, signal=39%
GO_DENDRITIC_SPINE_MORPHOGENESIS	go_dendritic_spine_morphogenesis	GO_DENDRITIC_SPINE_MORPHOGENESIS		62	0.549574	1.77732	0.00788955	0.0769939	0.712	4682	tags=37%, list=8%, signal=40%
GO_REGULATION_OF_DOUBLE_STRAND_BREAK_REPAIR_VIA_HOMOLOGOUS_RECOMBINATION	go_regulation_of_double_strand_break_repair_via_homologous_recombination	GO_REGULATION_OF_DOUBLE_STRAND_BREAK_REPAIR_VIA_HOMOLOGOUS_RECOMBINATION		46	0.59873	1.77699	0.0120968	0.076928	0.713	7103	tags=48%, list=13%, signal=55%
GO_POSITIVE_REGULATION_OF_ERYTHROCYTE_DIFFERENTIATION	go_positive_regulation_of_erythrocyte_differentiation	GO_POSITIVE_REGULATION_OF_ERYTHROCYTE_DIFFERENTIATION		34	0.596036	1.7769	0.00606061	0.0765794	0.713	5228	tags=50%, list=9%, signal=55%
GO_VESICLE_CYTOSKELETAL_TRAFFICKING	go_vesicle_cytoskeletal_trafficking	GO_VESICLE_CYTOSKELETAL_TRAFFICKING		75	0.542359	1.77645	0.008	0.0765533	0.714	6541	tags=45%, list=12%, signal=51%
GO_REGULATION_OF_AMYLOID_PRECURSOR_PROTEIN_CATABOLIC_PROCESS	go_regulation_of_amyloid_precursor_protein_catabolic_process	GO_REGULATION_OF_AMYLOID_PRECURSOR_PROTEIN_CATABOLIC_PROCESS		40	0.535192	1.7763	0.00408998	0.0762401	0.714	3474	tags=38%, list=6%, signal=40%
GO_VASCULAR_ENDOTHELIAL_GROWTH_FACTOR_RECEPTOR_SIGNALING_PATHWAY	go_vascular_endothelial_growth_factor_receptor_signaling_pathway	GO_VASCULAR_ENDOTHELIAL_GROWTH_FACTOR_RECEPTOR_SIGNALING_PATHWAY		95	0.503489	1.77542	0.0040404	0.0765214	0.715	4658	tags=38%, list=8%, signal=41%
GO_REGULATION_OF_EXTRINSIC_APOPTOTIC_SIGNALING_PATHWAY	go_regulation_of_extrinsic_apoptotic_signaling_pathway	GO_REGULATION_OF_EXTRINSIC_APOPTOTIC_SIGNALING_PATHWAY		160	0.481211	1.77526	0.00401606	0.0762281	0.715	6000	tags=33%, list=11%, signal=36%
GO_FOREBRAIN_CELL_MIGRATION	go_forebrain_cell_migration	GO_FOREBRAIN_CELL_MIGRATION		57	0.551289	1.77437	0.00206612	0.07653	0.719	5288	tags=39%, list=10%, signal=43%
GO_REGULATION_OF_EARLY_ENDOSOME_TO_LATE_ENDOSOME_TRANSPORT	go_regulation_of_early_endosome_to_late_endosome_transport	GO_REGULATION_OF_EARLY_ENDOSOME_TO_LATE_ENDOSOME_TRANSPORT		17	0.706643	1.77401	0.0103093	0.0763995	0.721	5999	tags=65%, list=11%, signal=73%
GO_RECOMBINATIONAL_REPAIR	go_recombinational_repair	GO_RECOMBINATIONAL_REPAIR		136	0.556859	1.77368	0.0123457	0.0763343	0.722	7204	tags=48%, list=13%, signal=55%
GO_CELLULAR_COMPONENT_MAINTENANCE	go_cellular_component_maintenance	GO_CELLULAR_COMPONENT_MAINTENANCE		61	0.513777	1.77291	0.00965251	0.0765152	0.725	5956	tags=41%, list=11%, signal=46%
GO_REGULATION_OF_DENDRITIC_SPINE_MORPHOGENESIS	go_regulation_of_dendritic_spine_morphogenesis	GO_REGULATION_OF_DENDRITIC_SPINE_MORPHOGENESIS		48	0.565511	1.77243	0.00790514	0.0764807	0.729	4682	tags=38%, list=8%, signal=41%
GO_REGULATION_OF_LAMELLIPODIUM_ORGANIZATION	go_regulation_of_lamellipodium_organization	GO_REGULATION_OF_LAMELLIPODIUM_ORGANIZATION		49	0.550413	1.77142	0.00854701	0.0769107	0.731	5729	tags=41%, list=10%, signal=45%
GO_LENS_DEVELOPMENT_IN_CAMERA_TYPE_EYE	go_lens_development_in_camera_type_eye	GO_LENS_DEVELOPMENT_IN_CAMERA_TYPE_EYE		83	0.503446	1.77055	0.00413223	0.0771301	0.734	5250	tags=35%, list=9%, signal=39%
GO_EXPLORATION_BEHAVIOR	go_exploration_behavior	GO_EXPLORATION_BEHAVIOR		25	0.597373	1.77019	0.00209205	0.077031	0.736	5332	tags=36%, list=10%, signal=40%
GO_REGULATION_OF_FIBROBLAST_GROWTH_FACTOR_RECEPTOR_SIGNALING_PATHWAY	go_regulation_of_fibroblast_growth_factor_receptor_signaling_pathway	GO_REGULATION_OF_FIBROBLAST_GROWTH_FACTOR_RECEPTOR_SIGNALING_PATHWAY		37	0.549277	1.76994	0.00961539	0.0768693	0.737	5235	tags=35%, list=9%, signal=39%
GO_REGULATION_OF_HISTONE_H3_K9_METHYLATION	go_regulation_of_histone_h3_k9_methylation	GO_REGULATION_OF_HISTONE_H3_K9_METHYLATION		22	0.641923	1.76955	0.0040568	0.0768103	0.739	3438	tags=45%, list=6%, signal=48%
GO_HISTONE_H2A_MONOUBIQUITINATION	go_histone_h2a_monoubiquitination	GO_HISTONE_H2A_MONOUBIQUITINATION		17	0.675956	1.76888	0.00604839	0.0770095	0.739	10313	tags=76%, list=19%, signal=94%
GO_REGULATION_OF_DENDRITE_MORPHOGENESIS	go_regulation_of_dendrite_morphogenesis	GO_REGULATION_OF_DENDRITE_MORPHOGENESIS		95	0.50942	1.76842	0.00785855	0.07689	0.74	4682	tags=35%, list=8%, signal=38%
GO_STRESS_GRANULE_ASSEMBLY	go_stress_granule_assembly	GO_STRESS_GRANULE_ASSEMBLY		23	0.697656	1.76826	0	0.0766357	0.74	6226	tags=70%, list=11%, signal=78%
GO_SELECTIVE_AUTOPHAGY	go_selective_autophagy	GO_SELECTIVE_AUTOPHAGY		60	0.553563	1.76725	0.00407332	0.0771016	0.74	3943	tags=45%, list=7%, signal=48%
GO_FILOPODIUM_ASSEMBLY	go_filopodium_assembly	GO_FILOPODIUM_ASSEMBLY		60	0.532282	1.76721	0.00618557	0.0767681	0.74	3619	tags=40%, list=7%, signal=43%
GO_REGULATION_OF_MRNA_SPLICING_VIA_SPLICEOSOME	go_regulation_of_mrna_splicing_via_spliceosome	GO_REGULATION_OF_MRNA_SPLICING_VIA_SPLICEOSOME		113	0.578673	1.76456	0.01	0.0785911	0.749	8065	tags=48%, list=15%, signal=56%
GO_REGULATION_OF_SMALL_GTPASE_MEDIATED_SIGNAL_TRANSDUCTION	go_regulation_of_small_gtpase_mediated_signal_transduction	GO_REGULATION_OF_SMALL_GTPASE_MEDIATED_SIGNAL_TRANSDUCTION		321	0.482004	1.76368	0.0137795	0.0788406	0.753	6090	tags=37%, list=11%, signal=42%
GO_CELLULAR_SENESCENCE	go_cellular_senescence	GO_CELLULAR_SENESCENCE		71	0.505121	1.76365	0.0104167	0.0785004	0.753	5886	tags=38%, list=11%, signal=43%
GO_CELL_DEATH_IN_RESPONSE_TO_OXIDATIVE_STRESS	go_cell_death_in_response_to_oxidative_stress	GO_CELL_DEATH_IN_RESPONSE_TO_OXIDATIVE_STRESS		84	0.486742	1.76361	0.00215517	0.078178	0.753	4787	tags=33%, list=9%, signal=36%
GO_REGULATION_OF_RNA_SPLICING	go_regulation_of_rna_splicing	GO_REGULATION_OF_RNA_SPLICING		155	0.5647	1.76285	0.01002	0.0784931	0.754	8065	tags=50%, list=15%, signal=59%
GO_NEURAL_TUBE_DEVELOPMENT	go_neural_tube_development	GO_NEURAL_TUBE_DEVELOPMENT		163	0.504403	1.7626	0.0185567	0.0783087	0.755	6224	tags=42%, list=11%, signal=48%
GO_POSITIVE_REGULATION_OF_CELL_CYCLE_PHASE_TRANSITION	go_positive_regulation_of_cell_cycle_phase_transition	GO_POSITIVE_REGULATION_OF_CELL_CYCLE_PHASE_TRANSITION		108	0.502087	1.76228	0.00606061	0.0781768	0.756	5755	tags=33%, list=10%, signal=37%
GO_REGULATION_OF_NUCLEASE_ACTIVITY	go_regulation_of_nuclease_activity	GO_REGULATION_OF_NUCLEASE_ACTIVITY		22	0.622155	1.76188	0.0103306	0.0780999	0.757	7437	tags=45%, list=13%, signal=53%
GO_EXTRINSIC_APOPTOTIC_SIGNALING_PATHWAY_VIA_DEATH_DOMAIN_RECEPTORS	go_extrinsic_apoptotic_signaling_pathway_via_death_domain_receptors	GO_EXTRINSIC_APOPTOTIC_SIGNALING_PATHWAY_VIA_DEATH_DOMAIN_RECEPTORS		89	0.498176	1.7616	0.00410678	0.0780163	0.76	5312	tags=36%, list=10%, signal=40%
GO_DNA_INTEGRITY_CHECKPOINT	go_dna_integrity_checkpoint	GO_DNA_INTEGRITY_CHECKPOINT		159	0.552359	1.76121	0.0105932	0.0779642	0.76	5372	tags=38%, list=10%, signal=42%
GO_TELOMERE_ORGANIZATION	go_telomere_organization	GO_TELOMERE_ORGANIZATION		147	0.557811	1.76107	0.00847458	0.0777481	0.76	6437	tags=46%, list=12%, signal=52%
GO_MEMBRANE_BIOGENESIS	go_membrane_biogenesis	GO_MEMBRANE_BIOGENESIS		44	0.496325	1.76062	0.00392927	0.077715	0.76	5708	tags=34%, list=10%, signal=38%
GO_PHOSPHATIDYLSERINE_METABOLIC_PROCESS	go_phosphatidylserine_metabolic_process	GO_PHOSPHATIDYLSERINE_METABOLIC_PROCESS		33	0.559966	1.75966	0.00214133	0.0781045	0.763	4729	tags=36%, list=9%, signal=40%
GO_NEGATIVE_REGULATION_OF_SYNAPSE_ORGANIZATION	go_negative_regulation_of_synapse_organization	GO_NEGATIVE_REGULATION_OF_SYNAPSE_ORGANIZATION		25	0.583566	1.75917	0.00824742	0.0781047	0.763	3807	tags=36%, list=7%, signal=39%
GO_GANGLION_DEVELOPMENT	go_ganglion_development	GO_GANGLION_DEVELOPMENT		16	0.673558	1.75901	0.00801603	0.0779029	0.763	5291	tags=50%, list=10%, signal=55%
GO_POSTSYNAPTIC_MEMBRANE_ORGANIZATION	go_postsynaptic_membrane_organization	GO_POSTSYNAPTIC_MEMBRANE_ORGANIZATION		41	0.517191	1.75831	0.0102249	0.0780787	0.763	5332	tags=34%, list=10%, signal=38%
GO_DNA_CONFORMATION_CHANGE	go_dna_conformation_change	GO_DNA_CONFORMATION_CHANGE		281	0.531279	1.75678	0.0167364	0.0788761	0.765	5354	tags=42%, list=10%, signal=46%
GO_NEGATIVE_REGULATION_OF_AXON_GUIDANCE	go_negative_regulation_of_axon_guidance	GO_NEGATIVE_REGULATION_OF_AXON_GUIDANCE		28	0.611523	1.75567	0.016129	0.0793581	0.768	4796	tags=50%, list=9%, signal=55%
GO_MAGNESIUM_ION_TRANSPORT	go_magnesium_ion_transport	GO_MAGNESIUM_ION_TRANSPORT		17	0.702922	1.75544	0.0143737	0.0791775	0.768	4146	tags=53%, list=8%, signal=57%
GO_PROTEIN_K48_LINKED_UBIQUITINATION	go_protein_k48_linked_ubiquitination	GO_PROTEIN_K48_LINKED_UBIQUITINATION		56	0.583828	1.75479	0.0105042	0.0793594	0.77	7565	tags=59%, list=14%, signal=68%
GO_REGULATION_OF_ERYTHROCYTE_DIFFERENTIATION	go_regulation_of_erythrocyte_differentiation	GO_REGULATION_OF_ERYTHROCYTE_DIFFERENTIATION		50	0.551118	1.75346	0.010101	0.0801072	0.772	5228	tags=48%, list=9%, signal=53%
GO_REGULATION_OF_DOUBLE_STRAND_BREAK_REPAIR	go_regulation_of_double_strand_break_repair	GO_REGULATION_OF_DOUBLE_STRAND_BREAK_REPAIR		84	0.540913	1.75314	0.0102881	0.0800165	0.772	5672	tags=40%, list=10%, signal=45%
GO_HIPPO_SIGNALING	go_hippo_signaling	GO_HIPPO_SIGNALING		43	0.632873	1.75294	0.0281125	0.0797955	0.772	5103	tags=51%, list=9%, signal=56%
GO_CELL_CELL_JUNCTION_ASSEMBLY	go_cell_cell_junction_assembly	GO_CELL_CELL_JUNCTION_ASSEMBLY		147	0.462196	1.751	0.00601202	0.0809418	0.776	4357	tags=31%, list=8%, signal=33%
GO_REGULATION_OF_KERATINOCYTE_PROLIFERATION	go_regulation_of_keratinocyte_proliferation	GO_REGULATION_OF_KERATINOCYTE_PROLIFERATION		38	0.584326	1.75072	0.0161943	0.0808089	0.778	5863	tags=39%, list=11%, signal=44%
GO_PROTEIN_TARGETING_TO_VACUOLE	go_protein_targeting_to_vacuole	GO_PROTEIN_TARGETING_TO_VACUOLE		40	0.627807	1.75064	0.0121457	0.0805112	0.778	3963	tags=50%, list=7%, signal=54%
GO_POSITIVE_REGULATION_OF_CATABOLIC_PROCESS	go_positive_regulation_of_catabolic_process	GO_POSITIVE_REGULATION_OF_CATABOLIC_PROCESS		451	0.453994	1.75005	0.00207469	0.0805973	0.779	5913	tags=37%, list=11%, signal=42%
GO_ESTABLISHMENT_OF_PROTEIN_LOCALIZATION_TO_POSTSYNAPTIC_MEMBRANE	go_establishment_of_protein_localization_to_postsynaptic_membrane	GO_ESTABLISHMENT_OF_PROTEIN_LOCALIZATION_TO_POSTSYNAPTIC_MEMBRANE		17	0.635336	1.74942	0.0104384	0.0807477	0.781	4312	tags=47%, list=8%, signal=51%
GO_POSITIVE_REGULATION_OF_MRNA_PROCESSING	go_positive_regulation_of_mrna_processing	GO_POSITIVE_REGULATION_OF_MRNA_PROCESSING		33	0.603985	1.74911	0.00603622	0.0806198	0.781	7555	tags=45%, list=14%, signal=53%
GO_REGULATION_OF_DNA_RECOMBINATION	go_regulation_of_dna_recombination	GO_REGULATION_OF_DNA_RECOMBINATION		96	0.554311	1.74896	0.0168421	0.0803454	0.781	6569	tags=40%, list=12%, signal=45%
GO_MICROTUBULE_ANCHORING	go_microtubule_anchoring	GO_MICROTUBULE_ANCHORING		24	0.695382	1.74837	0.00613497	0.080535	0.782	3497	tags=46%, list=6%, signal=49%
GO_REGULATION_OF_UBIQUITIN_DEPENDENT_PROTEIN_CATABOLIC_PROCESS	go_regulation_of_ubiquitin_dependent_protein_catabolic_process	GO_REGULATION_OF_UBIQUITIN_DEPENDENT_PROTEIN_CATABOLIC_PROCESS		158	0.476152	1.74804	0.00616016	0.0805417	0.784	5480	tags=35%, list=10%, signal=39%
GO_REGULATION_OF_CELL_CYCLE_G1_S_PHASE_TRANSITION	go_regulation_of_cell_cycle_g1_s_phase_transition	GO_REGULATION_OF_CELL_CYCLE_G1_S_PHASE_TRANSITION		194	0.466591	1.74798	0.00421053	0.0802681	0.784	5701	tags=31%, list=10%, signal=35%
GO_REGULATION_OF_AUTOPHAGY_OF_MITOCHONDRION	go_regulation_of_autophagy_of_mitochondrion	GO_REGULATION_OF_AUTOPHAGY_OF_MITOCHONDRION		43	0.54843	1.74745	0.0103734	0.0803407	0.785	3681	tags=37%, list=7%, signal=40%
GO_POSITIVE_REGULATION_OF_RECEPTOR_MEDIATED_ENDOCYTOSIS	go_positive_regulation_of_receptor_mediated_endocytosis	GO_POSITIVE_REGULATION_OF_RECEPTOR_MEDIATED_ENDOCYTOSIS		51	0.498317	1.74745	0.0102459	0.0800168	0.785	7129	tags=43%, list=13%, signal=49%
GO_REGULATION_OF_ACTIN_FILAMENT_BASED_PROCESS	go_regulation_of_actin_filament_based_process	GO_REGULATION_OF_ACTIN_FILAMENT_BASED_PROCESS		394	0.442943	1.74683	0.00407332	0.0801654	0.788	5487	tags=33%, list=10%, signal=36%
GO_REGULATION_OF_CELL_PROJECTION_ASSEMBLY	go_regulation_of_cell_projection_assembly	GO_REGULATION_OF_CELL_PROJECTION_ASSEMBLY		180	0.45586	1.74585	0	0.0806096	0.791	6000	tags=39%, list=11%, signal=43%
GO_ESTABLISHMENT_OF_PLANAR_POLARITY_OF_EMBRYONIC_EPITHELIUM	go_establishment_of_planar_polarity_of_embryonic_epithelium	GO_ESTABLISHMENT_OF_PLANAR_POLARITY_OF_EMBRYONIC_EPITHELIUM		17	0.655006	1.74413	0.0077821	0.0814507	0.792	6134	tags=53%, list=11%, signal=60%
GO_NEGATIVE_REGULATION_OF_AXON_EXTENSION	go_negative_regulation_of_axon_extension	GO_NEGATIVE_REGULATION_OF_AXON_EXTENSION		43	0.544133	1.74352	0.00204918	0.0815475	0.795	5063	tags=42%, list=9%, signal=46%
GO_REGULATION_OF_TELOMERE_CAPPING	go_regulation_of_telomere_capping	GO_REGULATION_OF_TELOMERE_CAPPING		26	0.617322	1.74257	0.00996016	0.082008	0.797	6437	tags=50%, list=12%, signal=57%
GO_POSITIVE_REGULATION_OF_CELLULAR_PROTEIN_LOCALIZATION	go_positive_regulation_of_cellular_protein_localization	GO_POSITIVE_REGULATION_OF_CELLULAR_PROTEIN_LOCALIZATION		335	0.450771	1.74247	0.00639659	0.0817325	0.797	6000	tags=34%, list=11%, signal=38%
GO_DNA_GEOMETRIC_CHANGE	go_dna_geometric_change	GO_DNA_GEOMETRIC_CHANGE		116	0.568525	1.74214	0.0188285	0.0816904	0.799	5204	tags=46%, list=9%, signal=50%
GO_POSITIVE_REGULATION_OF_PROTEIN_KINASE_B_SIGNALING	go_positive_regulation_of_protein_kinase_b_signaling	GO_POSITIVE_REGULATION_OF_PROTEIN_KINASE_B_SIGNALING		175	0.472718	1.74161	0.0063425	0.0818178	0.8	5487	tags=31%, list=10%, signal=34%
GO_NEURON_PROJECTION_GUIDANCE	go_neuron_projection_guidance	GO_NEURON_PROJECTION_GUIDANCE		283	0.470687	1.74158	0.0120724	0.0815128	0.8	5704	tags=35%, list=10%, signal=39%
GO_VASCULOGENESIS	go_vasculogenesis	GO_VASCULOGENESIS		82	0.530565	1.74146	0.00808081	0.0812821	0.8	3999	tags=35%, list=7%, signal=38%
GO_POSITIVE_REGULATION_OF_CELLULAR_PROTEIN_CATABOLIC_PROCESS	go_positive_regulation_of_cellular_protein_catabolic_process	GO_POSITIVE_REGULATION_OF_CELLULAR_PROTEIN_CATABOLIC_PROCESS		148	0.464021	1.74133	0	0.0811146	0.8	5480	tags=36%, list=10%, signal=40%
GO_REGULATION_OF_ACTIN_FILAMENT_LENGTH	go_regulation_of_actin_filament_length	GO_REGULATION_OF_ACTIN_FILAMENT_LENGTH		186	0.462395	1.74102	0.00612245	0.0810476	0.8	5956	tags=38%, list=11%, signal=43%
GO_PROTEIN_MONOUBIQUITINATION	go_protein_monoubiquitination	GO_PROTEIN_MONOUBIQUITINATION		67	0.584447	1.74093	0.0105708	0.080807	0.801	7455	tags=60%, list=13%, signal=69%
GO_RAS_PROTEIN_SIGNAL_TRANSDUCTION	go_ras_protein_signal_transduction	GO_RAS_PROTEIN_SIGNAL_TRANSDUCTION		345	0.476657	1.74063	0.0122951	0.0807745	0.804	6187	tags=39%, list=11%, signal=44%
GO_POSITIVE_REGULATION_OF_TELOMERASE_ACTIVITY	go_positive_regulation_of_telomerase_activity	GO_POSITIVE_REGULATION_OF_TELOMERASE_ACTIVITY		36	0.598928	1.74039	0.012024	0.0806764	0.805	5764	tags=47%, list=10%, signal=53%
GO_NEGATIVE_REGULATION_OF_PROTEIN_POLYMERIZATION	go_negative_regulation_of_protein_polymerization	GO_NEGATIVE_REGULATION_OF_PROTEIN_POLYMERIZATION		76	0.471854	1.73992	0.0019802	0.080789	0.806	4500	tags=29%, list=8%, signal=31%
GO_ENDOTHELIAL_CELL_DEVELOPMENT	go_endothelial_cell_development	GO_ENDOTHELIAL_CELL_DEVELOPMENT		64	0.536929	1.73979	0.0153257	0.0805671	0.806	3219	tags=31%, list=6%, signal=33%
GO_ACTIN_FILAMENT_ORGANIZATION	go_actin_filament_organization	GO_ACTIN_FILAMENT_ORGANIZATION		424	0.441569	1.73861	0.00407332	0.0813266	0.809	5795	tags=35%, list=10%, signal=39%
GO_REGULATION_OF_MRNA_PROCESSING	go_regulation_of_mrna_processing	GO_REGULATION_OF_MRNA_PROCESSING		152	0.560344	1.73853	0.012	0.0810984	0.809	8065	tags=48%, list=15%, signal=56%
GO_NEGATIVE_REGULATION_OF_NERVOUS_SYSTEM_DEVELOPMENT	go_negative_regulation_of_nervous_system_development	GO_NEGATIVE_REGULATION_OF_NERVOUS_SYSTEM_DEVELOPMENT		313	0.439125	1.73846	0.00201613	0.0808502	0.809	5887	tags=34%, list=11%, signal=37%
GO_RETINAL_GANGLION_CELL_AXON_GUIDANCE	go_retinal_ganglion_cell_axon_guidance	GO_RETINAL_GANGLION_CELL_AXON_GUIDANCE		20	0.596173	1.73679	0.00849257	0.0816973	0.813	2006	tags=35%, list=4%, signal=36%
GO_HISTONE_MONOUBIQUITINATION	go_histone_monoubiquitination	GO_HISTONE_MONOUBIQUITINATION		29	0.643461	1.73648	0.00833333	0.0816695	0.813	7455	tags=66%, list=13%, signal=76%
GO_POSITIVE_REGULATION_OF_INTRACELLULAR_TRANSPORT	go_positive_regulation_of_intracellular_transport	GO_POSITIVE_REGULATION_OF_INTRACELLULAR_TRANSPORT		220	0.46654	1.73638	0.00856531	0.0814117	0.814	5999	tags=38%, list=11%, signal=42%
GO_NEGATIVE_REGULATION_OF_KERATINOCYTE_PROLIFERATION	go_negative_regulation_of_keratinocyte_proliferation	GO_NEGATIVE_REGULATION_OF_KERATINOCYTE_PROLIFERATION		18	0.648679	1.73608	0.0078125	0.0813425	0.814	5863	tags=50%, list=11%, signal=56%
GO_POSITIVE_REGULATION_OF_VASCULAR_ENDOTHELIAL_CELL_PROLIFERATION	go_positive_regulation_of_vascular_endothelial_cell_proliferation	GO_POSITIVE_REGULATION_OF_VASCULAR_ENDOTHELIAL_CELL_PROLIFERATION		23	0.586044	1.736	0.00400802	0.0810921	0.814	3203	tags=30%, list=6%, signal=32%
GO_REGULATION_OF_POSTSYNAPTIC_MEMBRANE_NEUROTRANSMITTER_RECEPTOR_LEVELS	go_regulation_of_postsynaptic_membrane_neurotransmitter_receptor_levels	GO_REGULATION_OF_POSTSYNAPTIC_MEMBRANE_NEUROTRANSMITTER_RECEPTOR_LEVELS		67	0.511724	1.73588	0.00204918	0.0808819	0.814	6631	tags=36%, list=12%, signal=41%
GO_NEGATIVE_REGULATION_OF_EXTRINSIC_APOPTOTIC_SIGNALING_PATHWAY_VIA_DEATH_DOMAIN_RECEPTORS	go_negative_regulation_of_extrinsic_apoptotic_signaling_pathway_via_death_domain_receptors	GO_NEGATIVE_REGULATION_OF_EXTRINSIC_APOPTOTIC_SIGNALING_PATHWAY_VIA_DEATH_DOMAIN_RECEPTORS		41	0.565376	1.73568	0.01417	0.0807451	0.815	5312	tags=37%, list=10%, signal=40%
GO_POSITIVE_REGULATION_OF_TELOMERE_MAINTENANCE_VIA_TELOMERE_LENGTHENING	go_positive_regulation_of_telomere_maintenance_via_telomere_lengthening	GO_POSITIVE_REGULATION_OF_TELOMERE_MAINTENANCE_VIA_TELOMERE_LENGTHENING		37	0.632499	1.73515	0.014862	0.0808801	0.816	5764	tags=49%, list=10%, signal=54%
GO_RESPONSE_TO_INTERLEUKIN_6	go_response_to_interleukin_6	GO_RESPONSE_TO_INTERLEUKIN_6		54	0.540021	1.73515	0.0121951	0.0805908	0.816	3155	tags=31%, list=6%, signal=33%
GO_PROTEIN_LOCALIZATION_TO_GOLGI_APPARATUS	go_protein_localization_to_golgi_apparatus	GO_PROTEIN_LOCALIZATION_TO_GOLGI_APPARATUS		28	0.612896	1.73508	0.0122449	0.080348	0.816	6584	tags=61%, list=12%, signal=69%
GO_BRANCH_ELONGATION_OF_AN_EPITHELIUM	go_branch_elongation_of_an_epithelium	GO_BRANCH_ELONGATION_OF_AN_EPITHELIUM		19	0.658338	1.73481	0.0101833	0.0802913	0.816	7193	tags=53%, list=13%, signal=60%
GO_HOMOPHILIC_CELL_ADHESION_VIA_PLASMA_MEMBRANE_ADHESION_MOLECULES	go_homophilic_cell_adhesion_via_plasma_membrane_adhesion_molecules	GO_HOMOPHILIC_CELL_ADHESION_VIA_PLASMA_MEMBRANE_ADHESION_MOLECULES		168	0.499208	1.73467	0.0159681	0.0801235	0.816	8042	tags=39%, list=15%, signal=45%
GO_REGULATION_OF_CYTOPLASMIC_TRANSPORT	go_regulation_of_cytoplasmic_transport	GO_REGULATION_OF_CYTOPLASMIC_TRANSPORT		25	0.635645	1.73465	0.0167015	0.0798476	0.816	5999	tags=60%, list=11%, signal=67%
GO_CORTICAL_ACTIN_CYTOSKELETON_ORGANIZATION	go_cortical_actin_cytoskeleton_organization	GO_CORTICAL_ACTIN_CYTOSKELETON_ORGANIZATION		39	0.582347	1.73366	0.0102881	0.0803172	0.816	2891	tags=41%, list=5%, signal=43%
GO_LAMELLIPODIUM_ORGANIZATION	go_lamellipodium_organization	GO_LAMELLIPODIUM_ORGANIZATION		85	0.508892	1.73319	0.00828157	0.0803975	0.818	5729	tags=41%, list=10%, signal=46%
GO_ACTIN_FILAMENT_DEPOLYMERIZATION	go_actin_filament_depolymerization	GO_ACTIN_FILAMENT_DEPOLYMERIZATION		57	0.530031	1.73316	0.00813008	0.080134	0.818	5734	tags=37%, list=10%, signal=41%
GO_HISTONE_H3_K4_TRIMETHYLATION	go_histone_h3_k4_trimethylation	GO_HISTONE_H3_K4_TRIMETHYLATION		18	0.770633	1.7329	0.00589391	0.0800559	0.819	2312	tags=50%, list=4%, signal=52%
GO_SPERMATID_NUCLEUS_DIFFERENTIATION	go_spermatid_nucleus_differentiation	GO_SPERMATID_NUCLEUS_DIFFERENTIATION		21	0.627503	1.73274	0.00412371	0.079972	0.82	2337	tags=33%, list=4%, signal=35%
GO_POSITIVE_REGULATION_OF_DNA_BIOSYNTHETIC_PROCESS	go_positive_regulation_of_dna_biosynthetic_process	GO_POSITIVE_REGULATION_OF_DNA_BIOSYNTHETIC_PROCESS		69	0.553064	1.73261	0.0150862	0.0798443	0.822	4256	tags=36%, list=8%, signal=39%
GO_POSITIVE_REGULATION_OF_SUPRAMOLECULAR_FIBER_ORGANIZATION	go_positive_regulation_of_supramolecular_fiber_organization	GO_POSITIVE_REGULATION_OF_SUPRAMOLECULAR_FIBER_ORGANIZATION		205	0.456586	1.73139	0.00813008	0.0805173	0.825	5729	tags=38%, list=10%, signal=42%
GO_CELL_MIGRATION_IN_HINDBRAIN	go_cell_migration_in_hindbrain	GO_CELL_MIGRATION_IN_HINDBRAIN		15	0.675822	1.7309	0.00585938	0.0806123	0.828	4672	tags=47%, list=8%, signal=51%
GO_REGULATION_OF_CELL_SHAPE	go_regulation_of_cell_shape	GO_REGULATION_OF_CELL_SHAPE		153	0.48964	1.73001	0.00843882	0.081044	0.83	7490	tags=46%, list=14%, signal=53%
GO_REGULATION_OF_SPINDLE_ASSEMBLY	go_regulation_of_spindle_assembly	GO_REGULATION_OF_SPINDLE_ASSEMBLY		24	0.610246	1.72935	0.0102881	0.0812686	0.831	2453	tags=42%, list=4%, signal=44%
GO_CERAMIDE_METABOLIC_PROCESS	go_ceramide_metabolic_process	GO_CERAMIDE_METABOLIC_PROCESS		97	0.466915	1.72918	0.00627615	0.0811378	0.832	6925	tags=39%, list=13%, signal=45%
GO_NEGATIVE_REGULATION_OF_CHROMATIN_ORGANIZATION	go_negative_regulation_of_chromatin_organization	GO_NEGATIVE_REGULATION_OF_CHROMATIN_ORGANIZATION		52	0.567695	1.72899	0.0167715	0.0809964	0.832	5835	tags=42%, list=11%, signal=47%
GO_HISTONE_H3_K9_TRIMETHYLATION	go_histone_h3_k9_trimethylation	GO_HISTONE_H3_K9_TRIMETHYLATION		16	0.701209	1.72886	0.00816326	0.080805	0.832	3438	tags=56%, list=6%, signal=60%
GO_REGULATION_OF_CYTOKINESIS	go_regulation_of_cytokinesis	GO_REGULATION_OF_CYTOKINESIS		90	0.551168	1.7284	0.00873363	0.0808645	0.832	5753	tags=40%, list=10%, signal=45%
GO_POSITIVE_REGULATION_OF_PEPTIDYL_THREONINE_PHOSPHORYLATION	go_positive_regulation_of_peptidyl_threonine_phosphorylation	GO_POSITIVE_REGULATION_OF_PEPTIDYL_THREONINE_PHOSPHORYLATION		30	0.570574	1.72838	0.0127389	0.0805965	0.832	3143	tags=37%, list=6%, signal=39%
GO_REGULATION_OF_RUFFLE_ASSEMBLY	go_regulation_of_ruffle_assembly	GO_REGULATION_OF_RUFFLE_ASSEMBLY		30	0.559959	1.72828	0.00806452	0.0803866	0.832	4607	tags=40%, list=8%, signal=44%
GO_EPITHELIAL_TUBE_BRANCHING_INVOLVED_IN_LUNG_MORPHOGENESIS	go_epithelial_tube_branching_involved_in_lung_morphogenesis	GO_EPITHELIAL_TUBE_BRANCHING_INVOLVED_IN_LUNG_MORPHOGENESIS		29	0.605215	1.72768	0.00814664	0.0806156	0.833	7193	tags=45%, list=13%, signal=52%
GO_3_UTR_MEDIATED_MRNA_STABILIZATION	go_3_utr_mediated_mrna_stabilization	GO_3_UTR_MEDIATED_MRNA_STABILIZATION		23	0.608318	1.72662	0.0177515	0.0810417	0.834	6653	tags=48%, list=12%, signal=54%
GO_ESTABLISHMENT_OF_PLANAR_POLARITY_INVOLVED_IN_NEURAL_TUBE_CLOSURE	go_establishment_of_planar_polarity_involved_in_neural_tube_closure	GO_ESTABLISHMENT_OF_PLANAR_POLARITY_INVOLVED_IN_NEURAL_TUBE_CLOSURE		15	0.684075	1.72659	0.00798403	0.080807	0.834	9232	tags=73%, list=17%, signal=88%
GO_POSITIVE_REGULATION_OF_PROTEIN_EXPORT_FROM_NUCLEUS	go_positive_regulation_of_protein_export_from_nucleus	GO_POSITIVE_REGULATION_OF_PROTEIN_EXPORT_FROM_NUCLEUS		21	0.578155	1.72616	0.00808081	0.0807922	0.834	7756	tags=57%, list=14%, signal=66%
GO_REGULATION_OF_NUCLEOCYTOPLASMIC_TRANSPORT	go_regulation_of_nucleocytoplasmic_transport	GO_REGULATION_OF_NUCLEOCYTOPLASMIC_TRANSPORT		112	0.514028	1.726	0.0104167	0.0806464	0.834	7756	tags=51%, list=14%, signal=59%
GO_POSITIVE_REGULATION_OF_FIBROBLAST_PROLIFERATION	go_positive_regulation_of_fibroblast_proliferation	GO_POSITIVE_REGULATION_OF_FIBROBLAST_PROLIFERATION		50	0.525891	1.72537	0.010352	0.0808638	0.837	8366	tags=46%, list=15%, signal=54%
GO_REGULATION_OF_PROTEIN_CONTAINING_COMPLEX_ASSEMBLY	go_regulation_of_protein_containing_complex_assembly	GO_REGULATION_OF_PROTEIN_CONTAINING_COMPLEX_ASSEMBLY		437	0.43148	1.72476	0.00212314	0.081078	0.837	5956	tags=36%, list=11%, signal=40%
GO_POSITIVE_REGULATION_OF_CELL_CYCLE_PROCESS	go_positive_regulation_of_cell_cycle_process	GO_POSITIVE_REGULATION_OF_CELL_CYCLE_PROCESS		297	0.474375	1.72449	0.00835073	0.0809978	0.837	5884	tags=34%, list=11%, signal=38%
GO_REGULATION_OF_AUTOPHAGY	go_regulation_of_autophagy	GO_REGULATION_OF_AUTOPHAGY		344	0.461428	1.72394	0.00416667	0.0811502	0.837	6094	tags=39%, list=11%, signal=44%
GO_POSITIVE_REGULATION_OF_TELOMERE_MAINTENANCE	go_positive_regulation_of_telomere_maintenance	GO_POSITIVE_REGULATION_OF_TELOMERE_MAINTENANCE		51	0.584847	1.72362	0.0149573	0.0811023	0.837	5764	tags=43%, list=10%, signal=48%
GO_DOUBLE_STRAND_BREAK_REPAIR	go_double_strand_break_repair	GO_DOUBLE_STRAND_BREAK_REPAIR		244	0.518015	1.72201	0.012685	0.0819554	0.84	5317	tags=39%, list=10%, signal=43%
GO_SYNAPSE_ORGANIZATION	go_synapse_organization	GO_SYNAPSE_ORGANIZATION		431	0.435529	1.72185	0.00803213	0.0817752	0.841	5332	tags=31%, list=10%, signal=34%
GO_MITOTIC_DNA_REPLICATION	go_mitotic_dna_replication	GO_MITOTIC_DNA_REPLICATION		16	0.765165	1.72177	0.00849257	0.0815659	0.842	4637	tags=56%, list=8%, signal=61%
GO_REGULATION_OF_CELLULAR_PROTEIN_CATABOLIC_PROCESS	go_regulation_of_cellular_protein_catabolic_process	GO_REGULATION_OF_CELLULAR_PROTEIN_CATABOLIC_PROCESS		256	0.4527	1.72152	0.00821355	0.0814601	0.842	5480	tags=34%, list=10%, signal=37%
GO_MEMBRANE_DOCKING	go_membrane_docking	GO_MEMBRANE_DOCKING		179	0.478055	1.72058	0.00416667	0.0818564	0.842	6239	tags=41%, list=11%, signal=46%
GO_POSITIVE_REGULATION_OF_CHROMOSOME_ORGANIZATION	go_positive_regulation_of_chromosome_organization	GO_POSITIVE_REGULATION_OF_CHROMOSOME_ORGANIZATION		178	0.518276	1.72032	0.012685	0.0817997	0.843	5764	tags=38%, list=10%, signal=42%
GO_POSITIVE_REGULATION_OF_CHROMOSOME_SEGREGATION	go_positive_regulation_of_chromosome_segregation	GO_POSITIVE_REGULATION_OF_CHROMOSOME_SEGREGATION		32	0.629857	1.71988	0.0103093	0.0818886	0.843	5458	tags=44%, list=10%, signal=49%
GO_RETROGRADE_TRANSPORT_ENDOSOME_TO_PLASMA_MEMBRANE	go_retrograde_transport_endosome_to_plasma_membrane	GO_RETROGRADE_TRANSPORT_ENDOSOME_TO_PLASMA_MEMBRANE		29	0.57382	1.71913	0.0104603	0.0821203	0.844	4288	tags=41%, list=8%, signal=45%
GO_REGULATION_OF_DENDRITE_DEVELOPMENT	go_regulation_of_dendrite_development	GO_REGULATION_OF_DENDRITE_DEVELOPMENT		155	0.486127	1.71833	0.012	0.0824098	0.847	6056	tags=39%, list=11%, signal=43%
GO_POSITIVE_REGULATION_OF_PROTEIN_CONTAINING_COMPLEX_ASSEMBLY	go_positive_regulation_of_protein_containing_complex_assembly	GO_POSITIVE_REGULATION_OF_PROTEIN_CONTAINING_COMPLEX_ASSEMBLY		255	0.446547	1.71828	0.00628931	0.0821847	0.847	5956	tags=39%, list=11%, signal=43%
GO_CYTOSOLIC_TRANSPORT	go_cytosolic_transport	GO_CYTOSOLIC_TRANSPORT		163	0.524919	1.71807	0.0102249	0.0820731	0.847	5029	tags=42%, list=9%, signal=46%
GO_NUCLEAR_TRANSPORT	go_nuclear_transport	GO_NUCLEAR_TRANSPORT		356	0.48825	1.71759	0.012766	0.082168	0.848	7911	tags=47%, list=14%, signal=54%
GO_REGULATION_OF_PROTEIN_LOCALIZATION_TO_CELL_PERIPHERY	go_regulation_of_protein_localization_to_cell_periphery	GO_REGULATION_OF_PROTEIN_LOCALIZATION_TO_CELL_PERIPHERY		121	0.449738	1.71695	0.00813008	0.0824456	0.849	6680	tags=34%, list=12%, signal=38%
GO_REGULATION_OF_DNA_METABOLIC_PROCESS	go_regulation_of_dna_metabolic_process	GO_REGULATION_OF_DNA_METABOLIC_PROCESS		347	0.476084	1.71629	0.0208333	0.0826812	0.85	6569	tags=38%, list=12%, signal=43%
GO_REGULATION_OF_RHO_PROTEIN_SIGNAL_TRANSDUCTION	go_regulation_of_rho_protein_signal_transduction	GO_REGULATION_OF_RHO_PROTEIN_SIGNAL_TRANSDUCTION		86	0.511996	1.71627	0.015873	0.0824522	0.85	5332	tags=34%, list=10%, signal=37%
GO_LIPID_TRANSLOCATION	go_lipid_translocation	GO_LIPID_TRANSLOCATION		46	0.526828	1.71553	0.0197239	0.0827304	0.853	7480	tags=48%, list=14%, signal=55%
GO_HISTONE_H4_ACETYLATION	go_histone_h4_acetylation	GO_HISTONE_H4_ACETYLATION		69	0.569372	1.71523	0.0160321	0.0826929	0.853	6302	tags=49%, list=11%, signal=56%
GO_RESPONSE_TO_MURAMYL_DIPEPTIDE	go_response_to_muramyl_dipeptide	GO_RESPONSE_TO_MURAMYL_DIPEPTIDE		20	0.659981	1.71513	0.0146444	0.082478	0.853	3047	tags=45%, list=6%, signal=48%
GO_POSITIVE_REGULATION_OF_WNT_SIGNALING_PATHWAY	go_positive_regulation_of_wnt_signaling_pathway	GO_POSITIVE_REGULATION_OF_WNT_SIGNALING_PATHWAY		180	0.463978	1.71498	0.0020284	0.0823465	0.854	7047	tags=38%, list=13%, signal=43%
GO_GANGLIOSIDE_METABOLIC_PROCESS	go_ganglioside_metabolic_process	GO_GANGLIOSIDE_METABOLIC_PROCESS		22	0.57157	1.71415	0.0100604	0.0827696	0.854	3878	tags=36%, list=7%, signal=39%
GO_CELLULAR_RESPONSE_TO_AMYLOID_BETA	go_cellular_response_to_amyloid_beta	GO_CELLULAR_RESPONSE_TO_AMYLOID_BETA		44	0.553546	1.71405	0.0250522	0.0825853	0.854	4181	tags=34%, list=8%, signal=37%
GO_AMYLOID_PRECURSOR_PROTEIN_METABOLIC_PROCESS	go_amyloid_precursor_protein_metabolic_process	GO_AMYLOID_PRECURSOR_PROTEIN_METABOLIC_PROCESS		70	0.476433	1.71397	0.00826446	0.0824059	0.854	5332	tags=40%, list=10%, signal=44%
GO_MIDBRAIN_DOPAMINERGIC_NEURON_DIFFERENTIATION	go_midbrain_dopaminergic_neuron_differentiation	GO_MIDBRAIN_DOPAMINERGIC_NEURON_DIFFERENTIATION		17	0.634112	1.71281	0.0102041	0.0829772	0.855	4213	tags=41%, list=8%, signal=45%
GO_NEGATIVE_REGULATION_OF_ORGANELLE_ORGANIZATION	go_negative_regulation_of_organelle_organization	GO_NEGATIVE_REGULATION_OF_ORGANELLE_ORGANIZATION		394	0.441869	1.71223	0.00630252	0.0831531	0.856	5473	tags=34%, list=10%, signal=38%
GO_REGULATION_OF_PROTEIN_EXPORT_FROM_NUCLEUS	go_regulation_of_protein_export_from_nucleus	GO_REGULATION_OF_PROTEIN_EXPORT_FROM_NUCLEUS		41	0.530256	1.71174	0.015873	0.0832899	0.857	4036	tags=41%, list=7%, signal=45%
GO_PROTEIN_O_LINKED_GLYCOSYLATION	go_protein_o_linked_glycosylation	GO_PROTEIN_O_LINKED_GLYCOSYLATION		102	0.461612	1.71165	0.00601202	0.0830846	0.857	3095	tags=25%, list=6%, signal=27%
GO_INTEGRIN_MEDIATED_SIGNALING_PATHWAY	go_integrin_mediated_signaling_pathway	GO_INTEGRIN_MEDIATED_SIGNALING_PATHWAY		107	0.533389	1.71131	0.024948	0.0830628	0.858	6185	tags=38%, list=11%, signal=43%
GO_REGULATION_OF_INTRACELLULAR_STEROID_HORMONE_RECEPTOR_SIGNALING_PATHWAY	go_regulation_of_intracellular_steroid_hormone_receptor_signaling_pathway	GO_REGULATION_OF_INTRACELLULAR_STEROID_HORMONE_RECEPTOR_SIGNALING_PATHWAY		75	0.524344	1.71116	0	0.0829351	0.858	6596	tags=45%, list=12%, signal=51%
GO_CILIARY_BASAL_BODY_PLASMA_MEMBRANE_DOCKING	go_ciliary_basal_body_plasma_membrane_docking	GO_CILIARY_BASAL_BODY_PLASMA_MEMBRANE_DOCKING		94	0.550276	1.7104	0.00829876	0.0832841	0.858	6831	tags=46%, list=12%, signal=52%
GO_SPINDLE_LOCALIZATION	go_spindle_localization	GO_SPINDLE_LOCALIZATION		49	0.594236	1.71003	0.0142276	0.0832908	0.858	5782	tags=49%, list=10%, signal=55%
GO_POSITIVE_REGULATION_OF_VASCULAR_ASSOCIATED_SMOOTH_MUSCLE_CELL_MIGRATION	go_positive_regulation_of_vascular_associated_smooth_muscle_cell_migration	GO_POSITIVE_REGULATION_OF_VASCULAR_ASSOCIATED_SMOOTH_MUSCLE_CELL_MIGRATION		22	0.621375	1.70987	0.0179641	0.0831272	0.859	7211	tags=50%, list=13%, signal=57%
GO_CHROMATIN_ASSEMBLY_OR_DISASSEMBLY	go_chromatin_assembly_or_disassembly	GO_CHROMATIN_ASSEMBLY_OR_DISASSEMBLY		146	0.532144	1.70986	0.0309278	0.0828892	0.859	5310	tags=42%, list=10%, signal=46%
GO_REGULATION_OF_ACTOMYOSIN_STRUCTURE_ORGANIZATION	go_regulation_of_actomyosin_structure_organization	GO_REGULATION_OF_ACTOMYOSIN_STRUCTURE_ORGANIZATION		98	0.485605	1.70939	0.0137795	0.0829444	0.859	5795	tags=38%, list=10%, signal=42%
GO_CEREBRAL_CORTEX_RADIALLY_ORIENTED_CELL_MIGRATION	go_cerebral_cortex_radially_oriented_cell_migration	GO_CEREBRAL_CORTEX_RADIALLY_ORIENTED_CELL_MIGRATION		30	0.592162	1.70901	0.00816326	0.0829828	0.86	5288	tags=43%, list=10%, signal=48%
GO_POSITIVE_REGULATION_OF_AXONOGENESIS	go_positive_regulation_of_axonogenesis	GO_POSITIVE_REGULATION_OF_AXONOGENESIS		86	0.507723	1.7088	0.0104167	0.0828632	0.86	5637	tags=41%, list=10%, signal=45%
GO_NUCLEAR_EXPORT	go_nuclear_export	GO_NUCLEAR_EXPORT		203	0.519561	1.70831	0.0227273	0.0829526	0.863	5240	tags=42%, list=9%, signal=46%
GO_POSITIVE_REGULATION_OF_MRNA_SPLICING_VIA_SPLICEOSOME	go_positive_regulation_of_mrna_splicing_via_spliceosome	GO_POSITIVE_REGULATION_OF_MRNA_SPLICING_VIA_SPLICEOSOME		23	0.623828	1.70828	0.00612245	0.082757	0.863	7555	tags=39%, list=14%, signal=45%
GO_MORPHOGENESIS_OF_EMBRYONIC_EPITHELIUM	go_morphogenesis_of_embryonic_epithelium	GO_MORPHOGENESIS_OF_EMBRYONIC_EPITHELIUM		151	0.483018	1.70802	0.022541	0.082661	0.863	6134	tags=37%, list=11%, signal=42%
GO_NEGATIVE_REGULATION_OF_EPITHELIAL_CELL_DIFFERENTIATION	go_negative_regulation_of_epithelial_cell_differentiation	GO_NEGATIVE_REGULATION_OF_EPITHELIAL_CELL_DIFFERENTIATION		49	0.512561	1.70792	0.0136719	0.0824891	0.863	3338	tags=29%, list=6%, signal=30%
GO_DNA_UNWINDING_INVOLVED_IN_DNA_REPLICATION	go_dna_unwinding_involved_in_dna_replication	GO_DNA_UNWINDING_INVOLVED_IN_DNA_REPLICATION		16	0.691051	1.70747	0.0181818	0.0825565	0.864	4122	tags=56%, list=7%, signal=61%
GO_POSITIVE_REGULATION_OF_INTRACELLULAR_PROTEIN_TRANSPORT	go_positive_regulation_of_intracellular_protein_transport	GO_POSITIVE_REGULATION_OF_INTRACELLULAR_PROTEIN_TRANSPORT		181	0.4605	1.70672	0.012959	0.0828423	0.864	5981	tags=36%, list=11%, signal=41%
GO_REGULATION_OF_PROTEIN_LOCALIZATION_TO_PLASMA_MEMBRANE	go_regulation_of_protein_localization_to_plasma_membrane	GO_REGULATION_OF_PROTEIN_LOCALIZATION_TO_PLASMA_MEMBRANE		100	0.453039	1.70643	0.0101626	0.0828091	0.864	6680	tags=33%, list=12%, signal=37%
GO_ESTABLISHMENT_OF_PROTEIN_LOCALIZATION_TO_VACUOLE	go_establishment_of_protein_localization_to_vacuole	GO_ESTABLISHMENT_OF_PROTEIN_LOCALIZATION_TO_VACUOLE		52	0.543288	1.70636	0.0141129	0.0826212	0.864	4415	tags=42%, list=8%, signal=46%
GO_REGULATION_OF_RAC_PROTEIN_SIGNAL_TRANSDUCTION	go_regulation_of_rac_protein_signal_transduction	GO_REGULATION_OF_RAC_PROTEIN_SIGNAL_TRANSDUCTION		17	0.634264	1.70435	0.0184426	0.0837187	0.868	5258	tags=71%, list=10%, signal=78%
GO_DNA_STRAND_ELONGATION	go_dna_strand_elongation	GO_DNA_STRAND_ELONGATION		26	0.708506	1.70412	0.0165631	0.0836401	0.868	7762	tags=69%, list=14%, signal=81%
GO_POSITIVE_REGULATION_OF_MICROTUBULE_POLYMERIZATION_OR_DEPOLYMERIZATION	go_positive_regulation_of_microtubule_polymerization_or_depolymerization	GO_POSITIVE_REGULATION_OF_MICROTUBULE_POLYMERIZATION_OR_DEPOLYMERIZATION		34	0.557308	1.70269	0.0178218	0.0845395	0.872	6878	tags=44%, list=12%, signal=50%
GO_ESTABLISHMENT_OF_RNA_LOCALIZATION	go_establishment_of_rna_localization	GO_ESTABLISHMENT_OF_RNA_LOCALIZATION		201	0.527108	1.70247	0.0164271	0.0844649	0.872	5279	tags=39%, list=10%, signal=43%
GO_STRESS_FIBER_ASSEMBLY	go_stress_fiber_assembly	GO_STRESS_FIBER_ASSEMBLY		103	0.486875	1.70233	0.0141988	0.0843653	0.872	3619	tags=31%, list=7%, signal=33%
GO_NEGATIVE_REGULATION_OF_NEURON_DIFFERENTIATION	go_negative_regulation_of_neuron_differentiation	GO_NEGATIVE_REGULATION_OF_NEURON_DIFFERENTIATION		223	0.442275	1.70185	0.00811359	0.0845245	0.872	5862	tags=34%, list=11%, signal=38%
GO_RUFFLE_ASSEMBLY	go_ruffle_assembly	GO_RUFFLE_ASSEMBLY		43	0.514133	1.70162	0.0158103	0.0844543	0.872	4607	tags=37%, list=8%, signal=41%
GO_HISTONE_H3_K9_METHYLATION	go_histone_h3_k9_methylation	GO_HISTONE_H3_K9_METHYLATION		37	0.616485	1.70048	0.0284553	0.0849968	0.874	4411	tags=49%, list=8%, signal=53%
GO_REGULATION_OF_PROTEIN_LOCALIZATION_TO_NUCLEUS	go_regulation_of_protein_localization_to_nucleus	GO_REGULATION_OF_PROTEIN_LOCALIZATION_TO_NUCLEUS		126	0.477681	1.69947	0.0146138	0.0854506	0.874	5981	tags=39%, list=11%, signal=44%
GO_INSULIN_RECEPTOR_SIGNALING_PATHWAY	go_insulin_receptor_signaling_pathway	GO_INSULIN_RECEPTOR_SIGNALING_PATHWAY		143	0.453127	1.69935	0.0040568	0.0852853	0.874	6736	tags=39%, list=12%, signal=44%
GO_POSITIVE_REGULATION_OF_RESPONSE_TO_ENDOPLASMIC_RETICULUM_STRESS	go_positive_regulation_of_response_to_endoplasmic_reticulum_stress	GO_POSITIVE_REGULATION_OF_RESPONSE_TO_ENDOPLASMIC_RETICULUM_STRESS		37	0.563029	1.69927	0.022541	0.0850819	0.874	5003	tags=46%, list=9%, signal=50%
GO_INTERACTION_WITH_SYMBIONT	go_interaction_with_symbiont	GO_INTERACTION_WITH_SYMBIONT		93	0.450186	1.69834	0.00617284	0.0855324	0.877	6044	tags=32%, list=11%, signal=36%
GO_POSITIVE_REGULATION_OF_CYTOSKELETON_ORGANIZATION	go_positive_regulation_of_cytoskeleton_organization	GO_POSITIVE_REGULATION_OF_CYTOSKELETON_ORGANIZATION		227	0.445705	1.69785	0.00829876	0.0857284	0.877	5729	tags=37%, list=10%, signal=41%
GO_RESPONSE_TO_FIBROBLAST_GROWTH_FACTOR	go_response_to_fibroblast_growth_factor	GO_RESPONSE_TO_FIBROBLAST_GROWTH_FACTOR		148	0.458184	1.69744	0.0101833	0.0858529	0.879	5452	tags=31%, list=10%, signal=34%
GO_CELL_JUNCTION_ASSEMBLY	go_cell_junction_assembly	GO_CELL_JUNCTION_ASSEMBLY		434	0.440535	1.69675	0.0101626	0.0860932	0.88	5250	tags=30%, list=9%, signal=33%
GO_POSITIVE_REGULATION_OF_LAMELLIPODIUM_ORGANIZATION	go_positive_regulation_of_lamellipodium_organization	GO_POSITIVE_REGULATION_OF_LAMELLIPODIUM_ORGANIZATION		33	0.552777	1.69659	0.0145833	0.0859812	0.88	5729	tags=39%, list=10%, signal=44%
GO_POSITIVE_REGULATION_OF_ORGANELLE_ASSEMBLY	go_positive_regulation_of_organelle_assembly	GO_POSITIVE_REGULATION_OF_ORGANELLE_ASSEMBLY		69	0.552733	1.69628	0.014862	0.0859637	0.881	5141	tags=46%, list=9%, signal=51%
GO_REGULATION_OF_NUCLEOBASE_CONTAINING_COMPOUND_TRANSPORT	go_regulation_of_nucleobase_containing_compound_transport	GO_REGULATION_OF_NUCLEOBASE_CONTAINING_COMPOUND_TRANSPORT		19	0.761066	1.69612	0.00205761	0.0858204	0.882	6943	tags=63%, list=13%, signal=72%
GO_POSITIVE_REGULATION_OF_NEURON_DIFFERENTIATION	go_positive_regulation_of_neuron_differentiation	GO_POSITIVE_REGULATION_OF_NEURON_DIFFERENTIATION		378	0.441064	1.69604	0.00616016	0.0856483	0.882	6668	tags=35%, list=12%, signal=40%
GO_POSITIVE_REGULATION_OF_DNA_REPLICATION	go_positive_regulation_of_dna_replication	GO_POSITIVE_REGULATION_OF_DNA_REPLICATION		40	0.545563	1.69602	0.01222	0.0854226	0.882	8852	tags=52%, list=16%, signal=62%
GO_MODULATION_OF_PROCESS_OF_OTHER_ORGANISM	go_modulation_of_process_of_other_organism	GO_MODULATION_OF_PROCESS_OF_OTHER_ORGANISM		113	0.457581	1.69563	0.00819672	0.0854775	0.882	6044	tags=37%, list=11%, signal=42%
GO_POSITIVE_REGULATION_OF_TISSUE_REMODELING	go_positive_regulation_of_tissue_remodeling	GO_POSITIVE_REGULATION_OF_TISSUE_REMODELING		39	0.540727	1.69536	0.0145228	0.0854267	0.882	6055	tags=26%, list=11%, signal=29%
GO_TOLL_LIKE_RECEPTOR_3_SIGNALING_PATHWAY	go_toll_like_receptor_3_signaling_pathway	GO_TOLL_LIKE_RECEPTOR_3_SIGNALING_PATHWAY		20	0.675806	1.69501	0.0187891	0.085418	0.883	5561	tags=40%, list=10%, signal=44%
GO_REGULATION_OF_CELLULAR_RESPONSE_TO_TRANSFORMING_GROWTH_FACTOR_BETA_STIMULUS	go_regulation_of_cellular_response_to_transforming_growth_factor_beta_stimulus	GO_REGULATION_OF_CELLULAR_RESPONSE_TO_TRANSFORMING_GROWTH_FACTOR_BETA_STIMULUS		127	0.465641	1.69474	0.0142857	0.0853802	0.883	6661	tags=39%, list=12%, signal=45%
GO_NEGATIVE_REGULATION_OF_DNA_METABOLIC_PROCESS	go_negative_regulation_of_dna_metabolic_process	GO_NEGATIVE_REGULATION_OF_DNA_METABOLIC_PROCESS		114	0.495825	1.69463	0.0165631	0.0852584	0.883	5546	tags=38%, list=10%, signal=42%
GO_PRESYNAPTIC_ENDOCYTOSIS	go_presynaptic_endocytosis	GO_PRESYNAPTIC_ENDOCYTOSIS		62	0.48721	1.69367	0.0122951	0.0858346	0.884	4046	tags=31%, list=7%, signal=33%
GO_NCRNA_EXPORT_FROM_NUCLEUS	go_ncrna_export_from_nucleus	GO_NCRNA_EXPORT_FROM_NUCLEUS		37	0.683892	1.69333	0.0165289	0.0858907	0.884	4853	tags=54%, list=9%, signal=59%
GO_SERTOLI_CELL_DEVELOPMENT	go_sertoli_cell_development	GO_SERTOLI_CELL_DEVELOPMENT		15	0.592148	1.69325	0.00621118	0.0856983	0.884	2109	tags=40%, list=4%, signal=42%
GO_ACTIN_FILAMENT_BUNDLE_ORGANIZATION	go_actin_filament_bundle_organization	GO_ACTIN_FILAMENT_BUNDLE_ORGANIZATION		157	0.460631	1.69309	0.0202429	0.0855897	0.884	3642	tags=30%, list=7%, signal=32%
GO_EPITHELIAL_TUBE_FORMATION	go_epithelial_tube_formation	GO_EPITHELIAL_TUBE_FORMATION		133	0.482883	1.69294	0.0183299	0.0855025	0.884	6134	tags=39%, list=11%, signal=44%
GO_POSITIVE_REGULATION_OF_DNA_METABOLIC_PROCESS	go_positive_regulation_of_dna_metabolic_process	GO_POSITIVE_REGULATION_OF_DNA_METABOLIC_PROCESS		199	0.478971	1.69268	0.0210084	0.085422	0.884	4409	tags=33%, list=8%, signal=36%
GO_POSITIVE_REGULATION_OF_PROTEOLYSIS	go_positive_regulation_of_proteolysis	GO_POSITIVE_REGULATION_OF_PROTEOLYSIS		358	0.415499	1.69243	0.00814664	0.0853819	0.884	5691	tags=30%, list=10%, signal=33%
GO_ACTIN_POLYMERIZATION_OR_DEPOLYMERIZATION	go_actin_polymerization_or_depolymerization	GO_ACTIN_POLYMERIZATION_OR_DEPOLYMERIZATION		216	0.445625	1.69216	0.0143737	0.0853567	0.884	5956	tags=37%, list=11%, signal=41%
GO_REGULATION_OF_RECEPTOR_MEDIATED_ENDOCYTOSIS	go_regulation_of_receptor_mediated_endocytosis	GO_REGULATION_OF_RECEPTOR_MEDIATED_ENDOCYTOSIS		102	0.445051	1.69208	0.00803213	0.085179	0.885	7129	tags=38%, list=13%, signal=44%
GO_FOCAL_ADHESION_ASSEMBLY	go_focal_adhesion_assembly	GO_FOCAL_ADHESION_ASSEMBLY		83	0.53139	1.69208	0.0259481	0.0849577	0.885	8148	tags=49%, list=15%, signal=58%
GO_MITOTIC_SISTER_CHROMATID_COHESION	go_mitotic_sister_chromatid_cohesion	GO_MITOTIC_SISTER_CHROMATID_COHESION		25	0.670955	1.69186	0.00996016	0.0849038	0.885	4705	tags=52%, list=9%, signal=57%
GO_REGULATION_OF_CHROMATIN_ORGANIZATION	go_regulation_of_chromatin_organization	GO_REGULATION_OF_CHROMATIN_ORGANIZATION		181	0.501883	1.69164	0.0269151	0.0848201	0.885	5545	tags=37%, list=10%, signal=41%
GO_NEURON_PROJECTION_ARBORIZATION	go_neuron_projection_arborization	GO_NEURON_PROJECTION_ARBORIZATION		26	0.56647	1.69151	0.0190114	0.0846945	0.885	6668	tags=50%, list=12%, signal=57%
GO_MAMMARY_GLAND_EPITHELIUM_DEVELOPMENT	go_mammary_gland_epithelium_development	GO_MAMMARY_GLAND_EPITHELIUM_DEVELOPMENT		71	0.484933	1.69147	0.0122951	0.0845038	0.885	5781	tags=37%, list=10%, signal=41%
GO_PROTEIN_LOCALIZATION_TO_VACUOLE	go_protein_localization_to_vacuole	GO_PROTEIN_LOCALIZATION_TO_VACUOLE		67	0.507665	1.69134	0.014	0.0843691	0.885	4415	tags=39%, list=8%, signal=42%
GO_POSITIVE_REGULATION_OF_PROTEIN_SERINE_THREONINE_KINASE_ACTIVITY	go_positive_regulation_of_protein_serine_threonine_kinase_activity	GO_POSITIVE_REGULATION_OF_PROTEIN_SERINE_THREONINE_KINASE_ACTIVITY		341	0.437808	1.69078	0.010395	0.0845369	0.886	5433	tags=32%, list=10%, signal=36%
GO_POSITIVE_REGULATION_OF_PROTEIN_EXIT_FROM_ENDOPLASMIC_RETICULUM	go_positive_regulation_of_protein_exit_from_endoplasmic_reticulum	GO_POSITIVE_REGULATION_OF_PROTEIN_EXIT_FROM_ENDOPLASMIC_RETICULUM		15	0.634825	1.68962	0.0122449	0.0851479	0.888	4541	tags=53%, list=8%, signal=58%
GO_REGULATION_OF_EPITHELIAL_CELL_DIFFERENTIATION	go_regulation_of_epithelial_cell_differentiation	GO_REGULATION_OF_EPITHELIAL_CELL_DIFFERENTIATION		161	0.438115	1.68915	0.00596422	0.0852765	0.888	6515	tags=32%, list=12%, signal=37%
GO_REGULATION_OF_POSTTRANSCRIPTIONAL_GENE_SILENCING	go_regulation_of_posttranscriptional_gene_silencing	GO_REGULATION_OF_POSTTRANSCRIPTIONAL_GENE_SILENCING		89	0.535623	1.68862	0.0362903	0.0853876	0.888	6688	tags=47%, list=12%, signal=54%
GO_METHIONINE_METABOLIC_PROCESS	go_methionine_metabolic_process	GO_METHIONINE_METABOLIC_PROCESS		16	0.642919	1.68828	0.0148305	0.0854056	0.888	6491	tags=50%, list=12%, signal=57%
GO_CIRCADIAN_REGULATION_OF_GENE_EXPRESSION	go_circadian_regulation_of_gene_expression	GO_CIRCADIAN_REGULATION_OF_GENE_EXPRESSION		66	0.50884	1.68818	0.0275049	0.0852448	0.888	4448	tags=41%, list=8%, signal=44%
GO_SPINDLE_ASSEMBLY	go_spindle_assembly	GO_SPINDLE_ASSEMBLY		114	0.531177	1.68816	0.0169851	0.0850528	0.888	7948	tags=47%, list=14%, signal=55%
GO_MAINTENANCE_OF_BLOOD_BRAIN_BARRIER	go_maintenance_of_blood_brain_barrier	GO_MAINTENANCE_OF_BLOOD_BRAIN_BARRIER		34	0.552483	1.68807	0.0175097	0.0848943	0.888	3200	tags=38%, list=6%, signal=41%
GO_REGULATION_OF_TELOMERASE_ACTIVITY	go_regulation_of_telomerase_activity	GO_REGULATION_OF_TELOMERASE_ACTIVITY		48	0.552722	1.68777	0.0206186	0.0848561	0.888	5764	tags=44%, list=10%, signal=49%
GO_PROTEIN_POLYMERIZATION	go_protein_polymerization	GO_PROTEIN_POLYMERIZATION		295	0.42194	1.68746	0.00618557	0.0848704	0.888	5956	tags=34%, list=11%, signal=38%
GO_REGULATION_OF_CAMP_DEPENDENT_PROTEIN_KINASE_ACTIVITY	go_regulation_of_camp_dependent_protein_kinase_activity	GO_REGULATION_OF_CAMP_DEPENDENT_PROTEIN_KINASE_ACTIVITY		20	0.543427	1.68729	0.0103093	0.0847882	0.888	1447	tags=20%, list=3%, signal=21%
GO_RESPONSE_TO_UV	go_response_to_uv	GO_RESPONSE_TO_UV		138	0.478398	1.68697	0.0146751	0.0847864	0.889	5135	tags=37%, list=9%, signal=41%
GO_REGULATION_OF_INTRACELLULAR_ESTROGEN_RECEPTOR_SIGNALING_PATHWAY	go_regulation_of_intracellular_estrogen_receptor_signaling_pathway	GO_REGULATION_OF_INTRACELLULAR_ESTROGEN_RECEPTOR_SIGNALING_PATHWAY		39	0.555384	1.68697	0.0106838	0.084576	0.889	5701	tags=46%, list=10%, signal=51%
GO_POSITIVE_REGULATION_OF_PEPTIDYL_SERINE_PHOSPHORYLATION	go_positive_regulation_of_peptidyl_serine_phosphorylation	GO_POSITIVE_REGULATION_OF_PEPTIDYL_SERINE_PHOSPHORYLATION		109	0.432231	1.68695	0.00425532	0.0843775	0.889	7710	tags=37%, list=14%, signal=43%
GO_ACTIVATION_OF_JUN_KINASE_ACTIVITY	go_activation_of_jun_kinase_activity	GO_ACTIVATION_OF_JUN_KINASE_ACTIVITY		40	0.544136	1.68677	0.0120724	0.0843068	0.889	6859	tags=45%, list=12%, signal=51%
GO_REGULATION_OF_LONG_TERM_SYNAPTIC_POTENTIATION	go_regulation_of_long_term_synaptic_potentiation	GO_REGULATION_OF_LONG_TERM_SYNAPTIC_POTENTIATION		48	0.511166	1.68575	0.0165975	0.0848057	0.891	4071	tags=33%, list=7%, signal=36%
GO_CELLULAR_RESPONSE_TO_RADIATION	go_cellular_response_to_radiation	GO_CELLULAR_RESPONSE_TO_RADIATION		185	0.440157	1.68408	0.010661	0.0858222	0.893	4062	tags=31%, list=7%, signal=33%
GO_RHO_PROTEIN_SIGNAL_TRANSDUCTION	go_rho_protein_signal_transduction	GO_RHO_PROTEIN_SIGNAL_TRANSDUCTION		140	0.481461	1.68364	0.0218688	0.0859117	0.894	6134	tags=38%, list=11%, signal=42%
GO_CELL_SUBSTRATE_JUNCTION_ORGANIZATION	go_cell_substrate_junction_organization	GO_CELL_SUBSTRATE_JUNCTION_ORGANIZATION		102	0.535891	1.68323	0.0264766	0.0859809	0.894	3720	tags=35%, list=7%, signal=38%
GO_TISSUE_REGENERATION	go_tissue_regeneration	GO_TISSUE_REGENERATION		76	0.464319	1.68226	0.011976	0.0864548	0.896	5691	tags=29%, list=10%, signal=32%
GO_REGULATION_OF_MACROAUTOPHAGY	go_regulation_of_macroautophagy	GO_REGULATION_OF_MACROAUTOPHAGY		174	0.487719	1.68192	0.00831601	0.086467	0.896	5487	tags=41%, list=10%, signal=45%
GO_PORE_COMPLEX_ASSEMBLY	go_pore_complex_assembly	GO_PORE_COMPLEX_ASSEMBLY		20	0.637259	1.68189	0.0262626	0.08628	0.896	2621	tags=50%, list=5%, signal=52%
GO_POSITIVE_REGULATION_OF_PATTERN_RECOGNITION_RECEPTOR_SIGNALING_PATHWAY	go_positive_regulation_of_pattern_recognition_receptor_signaling_pathway	GO_POSITIVE_REGULATION_OF_PATTERN_RECOGNITION_RECEPTOR_SIGNALING_PATHWAY		37	0.585169	1.6812	0.0153846	0.0865809	0.896	5561	tags=38%, list=10%, signal=42%
GO_PROTEIN_LOCALIZATION_TO_MICROTUBULE_ORGANIZING_CENTER	go_protein_localization_to_microtubule_organizing_center	GO_PROTEIN_LOCALIZATION_TO_MICROTUBULE_ORGANIZING_CENTER		33	0.619287	1.68089	0.0265849	0.0866112	0.896	6750	tags=58%, list=12%, signal=66%
GO_REGULATION_OF_DNA_TEMPLATED_TRANSCRIPTION_INITIATION	go_regulation_of_dna_templated_transcription_initiation	GO_REGULATION_OF_DNA_TEMPLATED_TRANSCRIPTION_INITIATION		46	0.54026	1.68085	0.0100806	0.0864369	0.896	6431	tags=48%, list=12%, signal=54%
GO_REGULATION_OF_ENDOCYTOSIS	go_regulation_of_endocytosis	GO_REGULATION_OF_ENDOCYTOSIS		207	0.424727	1.68031	0.010101	0.086631	0.898	7129	tags=38%, list=13%, signal=43%
GO_REGULATION_OF_SYNAPTIC_VESICLE_ENDOCYTOSIS	go_regulation_of_synaptic_vesicle_endocytosis	GO_REGULATION_OF_SYNAPTIC_VESICLE_ENDOCYTOSIS		17	0.612061	1.68018	0.0123967	0.0865253	0.899	3737	tags=41%, list=7%, signal=44%
GO_NEGATIVE_REGULATION_OF_CELL_DEVELOPMENT	go_negative_regulation_of_cell_development	GO_NEGATIVE_REGULATION_OF_CELL_DEVELOPMENT		335	0.423836	1.68015	0.00831601	0.0863435	0.899	5862	tags=32%, list=11%, signal=36%
GO_PLASMA_MEMBRANE_TUBULATION	go_plasma_membrane_tubulation	GO_PLASMA_MEMBRANE_TUBULATION		19	0.586714	1.67997	0.020202	0.0862875	0.899	8148	tags=58%, list=15%, signal=68%
GO_HISTONE_H3_K4_METHYLATION	go_histone_h3_k4_methylation	GO_HISTONE_H3_K4_METHYLATION		53	0.592314	1.67967	0.0204918	0.0863154	0.899	6474	tags=45%, list=12%, signal=51%
GO_REGULATION_OF_CHROMATIN_ASSEMBLY	go_regulation_of_chromatin_assembly	GO_REGULATION_OF_CHROMATIN_ASSEMBLY		19	0.661505	1.67912	0.0307692	0.0865104	0.899	3467	tags=53%, list=6%, signal=56%
GO_REGULATION_OF_WNT_SIGNALING_PATHWAY	go_regulation_of_wnt_signaling_pathway	GO_REGULATION_OF_WNT_SIGNALING_PATHWAY		367	0.434145	1.67881	0.00612245	0.0865197	0.899	6158	tags=33%, list=11%, signal=37%
GO_POSITIVE_REGULATION_OF_REACTIVE_OXYGEN_SPECIES_BIOSYNTHETIC_PROCESS	go_positive_regulation_of_reactive_oxygen_species_biosynthetic_process	GO_POSITIVE_REGULATION_OF_REACTIVE_OXYGEN_SPECIES_BIOSYNTHETIC_PROCESS		58	0.47568	1.67877	0.0119048	0.0863534	0.899	7723	tags=36%, list=14%, signal=42%
GO_PEPTIDYL_LYSINE_ACETYLATION	go_peptidyl_lysine_acetylation	GO_PEPTIDYL_LYSINE_ACETYLATION		171	0.503475	1.6787	0.026971	0.0861887	0.899	7264	tags=46%, list=13%, signal=52%
GO_ORGANISM_EMERGENCE_FROM_PROTECTIVE_STRUCTURE	go_organism_emergence_from_protective_structure	GO_ORGANISM_EMERGENCE_FROM_PROTECTIVE_STRUCTURE		29	0.534666	1.67867	0.0124481	0.0860107	0.899	7000	tags=59%, list=13%, signal=67%
GO_REGULATION_OF_AXON_GUIDANCE	go_regulation_of_axon_guidance	GO_REGULATION_OF_AXON_GUIDANCE		44	0.541964	1.67708	0.0161616	0.0869926	0.903	5637	tags=43%, list=10%, signal=48%
GO_SUBSTRATE_DEPENDENT_CELL_MIGRATION	go_substrate_dependent_cell_migration	GO_SUBSTRATE_DEPENDENT_CELL_MIGRATION		28	0.595198	1.67629	0.0205761	0.0873867	0.904	4975	tags=43%, list=9%, signal=47%
GO_PROTEIN_ACETYLATION	go_protein_acetylation	GO_PROTEIN_ACETYLATION		201	0.491656	1.67616	0.0250522	0.0872788	0.904	7264	tags=45%, list=13%, signal=51%
GO_NEGATIVE_REGULATION_OF_EPITHELIAL_TO_MESENCHYMAL_TRANSITION	go_negative_regulation_of_epithelial_to_mesenchymal_transition	GO_NEGATIVE_REGULATION_OF_EPITHELIAL_TO_MESENCHYMAL_TRANSITION		37	0.511519	1.67609	0.0163934	0.0871227	0.904	6829	tags=41%, list=12%, signal=46%
GO_TUBE_FORMATION	go_tube_formation	GO_TUBE_FORMATION		150	0.468814	1.67607	0.0224949	0.0869336	0.904	5062	tags=35%, list=9%, signal=38%
GO_NEGATIVE_REGULATION_OF_CELLULAR_AMIDE_METABOLIC_PROCESS	go_negative_regulation_of_cellular_amide_metabolic_process	GO_NEGATIVE_REGULATION_OF_CELLULAR_AMIDE_METABOLIC_PROCESS		216	0.428723	1.67605	0.0178218	0.0867459	0.904	5921	tags=31%, list=11%, signal=34%
GO_HISTONE_METHYLATION	go_histone_methylation	GO_HISTONE_METHYLATION		137	0.53642	1.67595	0.0383065	0.0866034	0.904	6585	tags=42%, list=12%, signal=48%
GO_DNA_REPLICATION	go_dna_replication	GO_DNA_REPLICATION		272	0.503826	1.67595	0.0310559	0.0864071	0.904	8074	tags=45%, list=15%, signal=52%
GO_CELL_CYCLE_DNA_REPLICATION	go_cell_cycle_dna_replication	GO_CELL_CYCLE_DNA_REPLICATION		65	0.610382	1.67494	0.0313808	0.0869154	0.906	8867	tags=57%, list=16%, signal=68%
GO_CYTOPLASMIC_MICROTUBULE_ORGANIZATION	go_cytoplasmic_microtubule_organization	GO_CYTOPLASMIC_MICROTUBULE_ORGANIZATION		63	0.531227	1.67455	0.0162933	0.086962	0.906	6107	tags=49%, list=11%, signal=55%
GO_GOLGI_TO_PLASMA_MEMBRANE_TRANSPORT	go_golgi_to_plasma_membrane_transport	GO_GOLGI_TO_PLASMA_MEMBRANE_TRANSPORT		60	0.54106	1.67432	0.014433	0.0869621	0.906	5624	tags=45%, list=10%, signal=50%
GO_REGULATION_OF_MRNA_3_END_PROCESSING	go_regulation_of_mrna_3_end_processing	GO_REGULATION_OF_MRNA_3_END_PROCESSING		28	0.63626	1.67421	0.0204918	0.0868409	0.906	5156	tags=57%, list=9%, signal=63%
GO_PROTEIN_LOCALIZATION_TO_CYTOSKELETON	go_protein_localization_to_cytoskeleton	GO_PROTEIN_LOCALIZATION_TO_CYTOSKELETON		57	0.555713	1.67352	0.0165631	0.0871527	0.906	7191	tags=51%, list=13%, signal=58%
GO_REGULATION_OF_NEURON_MIGRATION	go_regulation_of_neuron_migration	GO_REGULATION_OF_NEURON_MIGRATION		45	0.538737	1.67283	0.012024	0.0875155	0.906	5685	tags=36%, list=10%, signal=40%
GO_COVALENT_CHROMATIN_MODIFICATION	go_covalent_chromatin_modification	GO_COVALENT_CHROMATIN_MODIFICATION		471	0.496357	1.67249	0.0330578	0.087543	0.907	7285	tags=43%, list=13%, signal=49%
GO_G2_DNA_DAMAGE_CHECKPOINT	go_g2_dna_damage_checkpoint	GO_G2_DNA_DAMAGE_CHECKPOINT		35	0.570922	1.67191	0.0224033	0.0878301	0.908	6030	tags=43%, list=11%, signal=48%
GO_POSITIVE_REGULATION_OF_CYCLIN_DEPENDENT_PROTEIN_KINASE_ACTIVITY	go_positive_regulation_of_cyclin_dependent_protein_kinase_activity	GO_POSITIVE_REGULATION_OF_CYCLIN_DEPENDENT_PROTEIN_KINASE_ACTIVITY		35	0.544271	1.67119	0.0205761	0.0881407	0.908	5277	tags=43%, list=10%, signal=47%
GO_NEGATIVE_REGULATION_OF_AUTOPHAGY	go_negative_regulation_of_autophagy	GO_NEGATIVE_REGULATION_OF_AUTOPHAGY		84	0.483853	1.67008	0.0263692	0.0887804	0.911	6094	tags=38%, list=11%, signal=43%
GO_NEGATIVE_REGULATION_OF_UBIQUITIN_DEPENDENT_PROTEIN_CATABOLIC_PROCESS	go_negative_regulation_of_ubiquitin_dependent_protein_catabolic_process	GO_NEGATIVE_REGULATION_OF_UBIQUITIN_DEPENDENT_PROTEIN_CATABOLIC_PROCESS		48	0.517732	1.6696	0.022449	0.0889269	0.911	4739	tags=42%, list=9%, signal=46%
GO_PROTEIN_KINASE_B_SIGNALING	go_protein_kinase_b_signaling	GO_PROTEIN_KINASE_B_SIGNALING		267	0.424723	1.6693	0.00852879	0.0889069	0.911	5487	tags=27%, list=10%, signal=30%
GO_EXTRINSIC_APOPTOTIC_SIGNALING_PATHWAY	go_extrinsic_apoptotic_signaling_pathway	GO_EXTRINSIC_APOPTOTIC_SIGNALING_PATHWAY		228	0.436276	1.66884	0.0164609	0.0890492	0.911	6000	tags=32%, list=11%, signal=35%
GO_REGULATION_OF_DNA_BIOSYNTHETIC_PROCESS	go_regulation_of_dna_biosynthetic_process	GO_REGULATION_OF_DNA_BIOSYNTHETIC_PROCESS		108	0.501624	1.66869	0.021692	0.0889771	0.911	5365	tags=36%, list=10%, signal=40%
GO_POSITIVE_REGULATION_OF_CELLULAR_RESPONSE_TO_TRANSFORMING_GROWTH_FACTOR_BETA_STIMULUS	go_positive_regulation_of_cellular_response_to_transforming_growth_factor_beta_stimulus	GO_POSITIVE_REGULATION_OF_CELLULAR_RESPONSE_TO_TRANSFORMING_GROWTH_FACTOR_BETA_STIMULUS		30	0.535913	1.66857	0.0181087	0.0888583	0.911	6044	tags=50%, list=11%, signal=56%
GO_POSITIVE_REGULATION_OF_ACTIN_FILAMENT_POLYMERIZATION	go_positive_regulation_of_actin_filament_polymerization	GO_POSITIVE_REGULATION_OF_ACTIN_FILAMENT_POLYMERIZATION		100	0.470301	1.66785	0.0147059	0.0891539	0.912	5956	tags=44%, list=11%, signal=49%
GO_LYTIC_VACUOLE_ORGANIZATION	go_lytic_vacuole_organization	GO_LYTIC_VACUOLE_ORGANIZATION		66	0.496734	1.66778	0.0214592	0.0890213	0.912	5487	tags=41%, list=10%, signal=45%
GO_PROTEIN_DEPOLYMERIZATION	go_protein_depolymerization	GO_PROTEIN_DEPOLYMERIZATION		113	0.468069	1.66688	0.0179641	0.0894426	0.914	5734	tags=35%, list=10%, signal=38%
GO_DNA_PACKAGING	go_dna_packaging	GO_DNA_PACKAGING		166	0.500965	1.6668	0.0372671	0.0893046	0.914	5354	tags=39%, list=10%, signal=43%
GO_VIRAL_LIFE_CYCLE	go_viral_life_cycle	GO_VIRAL_LIFE_CYCLE		337	0.458381	1.66634	0.0210526	0.0894761	0.915	5380	tags=34%, list=10%, signal=37%
GO_PHOSPHATIDYLINOSITOL_DEPHOSPHORYLATION	go_phosphatidylinositol_dephosphorylation	GO_PHOSPHATIDYLINOSITOL_DEPHOSPHORYLATION		31	0.610706	1.66586	0.0180723	0.0896293	0.915	6829	tags=55%, list=12%, signal=63%
GO_REGULATION_OF_ACTIN_FILAMENT_BUNDLE_ASSEMBLY	go_regulation_of_actin_filament_bundle_assembly	GO_REGULATION_OF_ACTIN_FILAMENT_BUNDLE_ASSEMBLY		101	0.469767	1.66584	0.0252918	0.0894533	0.915	3619	tags=31%, list=7%, signal=33%
GO_REGULATION_OF_CHROMATIN_ASSEMBLY_OR_DISASSEMBLY	go_regulation_of_chromatin_assembly_or_disassembly	GO_REGULATION_OF_CHROMATIN_ASSEMBLY_OR_DISASSEMBLY		24	0.620294	1.66583	0.0313725	0.0892589	0.915	5097	tags=50%, list=9%, signal=55%
GO_REGULATION_OF_ORGANELLE_ASSEMBLY	go_regulation_of_organelle_assembly	GO_REGULATION_OF_ORGANELLE_ASSEMBLY		189	0.467483	1.66538	0.00424628	0.0893926	0.915	5274	tags=38%, list=10%, signal=42%
GO_LIPOPROTEIN_CATABOLIC_PROCESS	go_lipoprotein_catabolic_process	GO_LIPOPROTEIN_CATABOLIC_PROCESS		15	0.600354	1.6651	0.010101	0.0893282	0.915	5332	tags=40%, list=10%, signal=44%
GO_CYTOKINESIS	go_cytokinesis	GO_CYTOKINESIS		159	0.483802	1.66506	0.0190275	0.0891554	0.915	5753	tags=37%, list=10%, signal=41%
GO_PEPTIDYL_LYSINE_TRIMETHYLATION	go_peptidyl_lysine_trimethylation	GO_PEPTIDYL_LYSINE_TRIMETHYLATION		48	0.618232	1.6644	0.028	0.0894433	0.917	6585	tags=50%, list=12%, signal=57%
GO_MITOTIC_RECOMBINATION	go_mitotic_recombination	GO_MITOTIC_RECOMBINATION		22	0.607381	1.66344	0.0266393	0.0899965	0.917	6437	tags=59%, list=12%, signal=67%
GO_INTERACTION_WITH_HOST	go_interaction_with_host	GO_INTERACTION_WITH_HOST		212	0.458754	1.66332	0.0226337	0.089884	0.917	7331	tags=39%, list=13%, signal=44%
GO_POLARIZED_EPITHELIAL_CELL_DIFFERENTIATION	go_polarized_epithelial_cell_differentiation	GO_POLARIZED_EPITHELIAL_CELL_DIFFERENTIATION		22	0.564285	1.66299	0.0195312	0.0898906	0.918	5083	tags=50%, list=9%, signal=55%
GO_INTESTINAL_EPITHELIAL_CELL_DIFFERENTIATION	go_intestinal_epithelial_cell_differentiation	GO_INTESTINAL_EPITHELIAL_CELL_DIFFERENTIATION		23	0.598016	1.6629	0.0108932	0.0897509	0.918	1231	tags=26%, list=2%, signal=27%
GO_MICROTUBULE_ORGANIZING_CENTER_LOCALIZATION	go_microtubule_organizing_center_localization	GO_MICROTUBULE_ORGANIZING_CENTER_LOCALIZATION		31	0.637838	1.66281	0.0390947	0.089635	0.918	5956	tags=52%, list=11%, signal=58%
GO_POSITIVE_REGULATION_OF_NITRIC_OXIDE_METABOLIC_PROCESS	go_positive_regulation_of_nitric_oxide_metabolic_process	GO_POSITIVE_REGULATION_OF_NITRIC_OXIDE_METABOLIC_PROCESS		46	0.52346	1.66246	0.0305499	0.0896969	0.918	7723	tags=37%, list=14%, signal=43%
GO_PEPTIDYL_TYROSINE_MODIFICATION	go_peptidyl_tyrosine_modification	GO_PEPTIDYL_TYROSINE_MODIFICATION		372	0.434263	1.66166	0.0147992	0.0900384	0.918	6534	tags=32%, list=12%, signal=36%
GO_NLS_BEARING_PROTEIN_IMPORT_INTO_NUCLEUS	go_nls_bearing_protein_import_into_nucleus	GO_NLS_BEARING_PROTEIN_IMPORT_INTO_NUCLEUS		20	0.659342	1.66141	0.0218254	0.0899948	0.918	9719	tags=65%, list=18%, signal=79%
GO_MOVEMENT_IN_HOST_ENVIRONMENT	go_movement_in_host_environment	GO_MOVEMENT_IN_HOST_ENVIRONMENT		169	0.476071	1.66119	0.0230608	0.0899536	0.919	7331	tags=38%, list=13%, signal=44%
GO_GLIAL_CELL_MIGRATION	go_glial_cell_migration	GO_GLIAL_CELL_MIGRATION		54	0.517307	1.65983	0.0250522	0.0907194	0.921	5781	tags=43%, list=10%, signal=48%
GO_POSITIVE_REGULATION_OF_GLYCOPROTEIN_BIOSYNTHETIC_PROCESS	go_positive_regulation_of_glycoprotein_biosynthetic_process	GO_POSITIVE_REGULATION_OF_GLYCOPROTEIN_BIOSYNTHETIC_PROCESS		22	0.591112	1.65978	0.0102459	0.0905626	0.921	5201	tags=50%, list=9%, signal=55%
GO_POSTSYNAPTIC_MODULATION_OF_CHEMICAL_SYNAPTIC_TRANSMISSION	go_postsynaptic_modulation_of_chemical_synaptic_transmission	GO_POSTSYNAPTIC_MODULATION_OF_CHEMICAL_SYNAPTIC_TRANSMISSION		16	0.627402	1.6596	0.0200803	0.0905528	0.922	8811	tags=50%, list=16%, signal=59%
GO_ESTABLISHMENT_OF_ORGANELLE_LOCALIZATION	go_establishment_of_organelle_localization	GO_ESTABLISHMENT_OF_ORGANELLE_LOCALIZATION		429	0.447197	1.65951	0.0189076	0.0904256	0.922	5326	tags=34%, list=10%, signal=37%
GO_NEGATIVE_REGULATION_OF_CELLULAR_CATABOLIC_PROCESS	go_negative_regulation_of_cellular_catabolic_process	GO_NEGATIVE_REGULATION_OF_CELLULAR_CATABOLIC_PROCESS		259	0.437917	1.65951	0.01875	0.0902382	0.922	6695	tags=36%, list=12%, signal=41%
GO_N_ACETYLGLUCOSAMINE_METABOLIC_PROCESS	go_n_acetylglucosamine_metabolic_process	GO_N_ACETYLGLUCOSAMINE_METABOLIC_PROCESS		19	0.548316	1.65878	0.0199601	0.0907163	0.922	4996	tags=37%, list=9%, signal=40%
GO_BLASTOCYST_GROWTH	go_blastocyst_growth	GO_BLASTOCYST_GROWTH		20	0.663932	1.65838	0.02537	0.0908307	0.922	4023	tags=45%, list=7%, signal=49%
GO_MITOPHAGY	go_mitophagy	GO_MITOPHAGY		25	0.606924	1.65776	0.0301205	0.0910763	0.922	3943	tags=48%, list=7%, signal=52%
GO_REGULATION_OF_CELLULAR_RESPONSE_TO_INSULIN_STIMULUS	go_regulation_of_cellular_response_to_insulin_stimulus	GO_REGULATION_OF_CELLULAR_RESPONSE_TO_INSULIN_STIMULUS		75	0.459337	1.65766	0.0105042	0.0909616	0.922	6596	tags=39%, list=12%, signal=44%
GO_LONG_TERM_SYNAPTIC_POTENTIATION	go_long_term_synaptic_potentiation	GO_LONG_TERM_SYNAPTIC_POTENTIATION		87	0.46077	1.65743	0.0101833	0.0909246	0.922	3488	tags=28%, list=6%, signal=29%
GO_NEGATIVE_REGULATION_OF_EXOCYTOSIS	go_negative_regulation_of_exocytosis	GO_NEGATIVE_REGULATION_OF_EXOCYTOSIS		33	0.571009	1.65669	0.0321199	0.091243	0.922	3729	tags=36%, list=7%, signal=39%
GO_POSITIVE_REGULATION_OF_GTPASE_ACTIVITY	go_positive_regulation_of_gtpase_activity	GO_POSITIVE_REGULATION_OF_GTPASE_ACTIVITY		399	0.444668	1.65578	0.0264766	0.0917206	0.925	6081	tags=36%, list=11%, signal=40%
GO_NEUROTRANSMITTER_RECEPTOR_TRANSPORT	go_neurotransmitter_receptor_transport	GO_NEUROTRANSMITTER_RECEPTOR_TRANSPORT		47	0.503777	1.65551	0.00616016	0.0916755	0.925	4312	tags=30%, list=8%, signal=32%
GO_POSITIVE_REGULATION_OF_PEPTIDYL_TYROSINE_PHOSPHORYLATION	go_positive_regulation_of_peptidyl_tyrosine_phosphorylation	GO_POSITIVE_REGULATION_OF_PEPTIDYL_TYROSINE_PHOSPHORYLATION		192	0.449881	1.65502	0.0212766	0.0917882	0.925	3575	tags=23%, list=6%, signal=25%
GO_NEGATIVE_REGULATION_OF_TELOMERE_MAINTENANCE_VIA_TELOMERE_LENGTHENING	go_negative_regulation_of_telomere_maintenance_via_telomere_lengthening	GO_NEGATIVE_REGULATION_OF_TELOMERE_MAINTENANCE_VIA_TELOMERE_LENGTHENING		27	0.617363	1.655	0.0309278	0.0916078	0.925	6437	tags=56%, list=12%, signal=63%
GO_REGULATION_OF_MEMBRANE_PROTEIN_ECTODOMAIN_PROTEOLYSIS	go_regulation_of_membrane_protein_ectodomain_proteolysis	GO_REGULATION_OF_MEMBRANE_PROTEIN_ECTODOMAIN_PROTEOLYSIS		23	0.594738	1.65469	0.0187891	0.0916238	0.925	7773	tags=52%, list=14%, signal=61%
GO_RESPONSE_TO_EPIDERMAL_GROWTH_FACTOR	go_response_to_epidermal_growth_factor	GO_RESPONSE_TO_EPIDERMAL_GROWTH_FACTOR		46	0.542704	1.65398	0.030426	0.0918898	0.927	4122	tags=43%, list=7%, signal=47%
GO_AMYLOID_BETA_CLEARANCE	go_amyloid_beta_clearance	GO_AMYLOID_BETA_CLEARANCE		35	0.554273	1.65392	0.0209644	0.0917411	0.927	6125	tags=46%, list=11%, signal=51%
GO_FIBROBLAST_PROLIFERATION	go_fibroblast_proliferation	GO_FIBROBLAST_PROLIFERATION		83	0.452633	1.65361	0.0149254	0.0917536	0.927	4866	tags=31%, list=9%, signal=34%
GO_T_HELPER_1_CELL_DIFFERENTIATION	go_t_helper_1_cell_differentiation	GO_T_HELPER_1_CELL_DIFFERENTIATION		19	0.662108	1.65361	0.0329897	0.0915721	0.927	2560	tags=37%, list=5%, signal=39%
GO_ENDOSOMAL_TRANSPORT	go_endosomal_transport	GO_ENDOSOMAL_TRANSPORT		241	0.472229	1.65352	0.0271967	0.0914402	0.927	5663	tags=41%, list=10%, signal=45%
GO_REGULATION_OF_EPIDERMIS_DEVELOPMENT	go_regulation_of_epidermis_development	GO_REGULATION_OF_EPIDERMIS_DEVELOPMENT		87	0.469995	1.65345	0.0222222	0.0913055	0.927	5405	tags=36%, list=10%, signal=39%
GO_REGULATION_OF_DNA_DAMAGE_CHECKPOINT	go_regulation_of_dna_damage_checkpoint	GO_REGULATION_OF_DNA_DAMAGE_CHECKPOINT		16	0.657839	1.65315	0.0209205	0.0913127	0.927	4926	tags=50%, list=9%, signal=55%
GO_RNA_LOCALIZATION	go_rna_localization	GO_RNA_LOCALIZATION		234	0.509579	1.65279	0.0273109	0.09141	0.927	5279	tags=38%, list=10%, signal=42%
GO_CEREBRAL_CORTEX_DEVELOPMENT	go_cerebral_cortex_development	GO_CEREBRAL_CORTEX_DEVELOPMENT		113	0.48388	1.65254	0.0309917	0.0914067	0.928	5942	tags=39%, list=11%, signal=44%
GO_HETEROTYPIC_CELL_CELL_ADHESION	go_heterotypic_cell_cell_adhesion	GO_HETEROTYPIC_CELL_CELL_ADHESION		62	0.533782	1.65197	0.0229167	0.0915904	0.929	3874	tags=31%, list=7%, signal=33%
GO_REGULATION_OF_PROTEIN_STABILITY	go_regulation_of_protein_stability	GO_REGULATION_OF_PROTEIN_STABILITY		291	0.428618	1.65172	0.0274841	0.0915739	0.929	4866	tags=34%, list=9%, signal=37%
GO_RNA_EXPORT_FROM_NUCLEUS	go_rna_export_from_nucleus	GO_RNA_EXPORT_FROM_NUCLEUS		143	0.540164	1.65147	0.0365854	0.091573	0.93	5191	tags=42%, list=9%, signal=46%
GO_NEGATIVE_REGULATION_OF_NEURON_DEATH	go_negative_regulation_of_neuron_death	GO_NEGATIVE_REGULATION_OF_NEURON_DEATH		210	0.420252	1.65104	0.0168776	0.091649	0.93	5931	tags=30%, list=11%, signal=33%
GO_PROTEIN_DNA_COMPLEX_SUBUNIT_ORGANIZATION	go_protein_dna_complex_subunit_organization	GO_PROTEIN_DNA_COMPLEX_SUBUNIT_ORGANIZATION		209	0.482965	1.65072	0.0427699	0.0916827	0.93	6539	tags=44%, list=12%, signal=50%
GO_REPRODUCTIVE_SYSTEM_DEVELOPMENT	go_reproductive_system_development	GO_REPRODUCTIVE_SYSTEM_DEVELOPMENT		444	0.413779	1.65061	0.0127119	0.091563	0.93	5538	tags=30%, list=10%, signal=33%
GO_REGULATION_OF_ACTIN_NUCLEATION	go_regulation_of_actin_nucleation	GO_REGULATION_OF_ACTIN_NUCLEATION		30	0.547274	1.64985	0.0189474	0.0919131	0.93	4383	tags=47%, list=8%, signal=51%
GO_SKELETAL_MUSCLE_TISSUE_REGENERATION	go_skeletal_muscle_tissue_regeneration	GO_SKELETAL_MUSCLE_TISSUE_REGENERATION		40	0.5034	1.64918	0.0121704	0.0922377	0.931	7270	tags=38%, list=13%, signal=43%
GO_REGULATION_OF_INTRACELLULAR_PROTEIN_TRANSPORT	go_regulation_of_intracellular_protein_transport	GO_REGULATION_OF_INTRACELLULAR_PROTEIN_TRANSPORT		262	0.440371	1.64716	0.0196078	0.0934718	0.932	5981	tags=37%, list=11%, signal=41%
GO_POSITIVE_REGULATION_OF_MUSCLE_HYPERTROPHY	go_positive_regulation_of_muscle_hypertrophy	GO_POSITIVE_REGULATION_OF_MUSCLE_HYPERTROPHY		34	0.523422	1.64698	0.0119284	0.0933996	0.932	7902	tags=38%, list=14%, signal=45%
GO_REGULATION_OF_PROTEIN_SUMOYLATION	go_regulation_of_protein_sumoylation	GO_REGULATION_OF_PROTEIN_SUMOYLATION		26	0.56816	1.64599	0.0362173	0.0939362	0.932	5691	tags=42%, list=10%, signal=47%
GO_REGULATION_OF_CYCLIN_DEPENDENT_PROTEIN_KINASE_ACTIVITY	go_regulation_of_cyclin_dependent_protein_kinase_activity	GO_REGULATION_OF_CYCLIN_DEPENDENT_PROTEIN_KINASE_ACTIVITY		103	0.456633	1.64597	0.0146751	0.0937643	0.932	3896	tags=30%, list=7%, signal=32%
GO_POSITIVE_REGULATION_OF_MITOTIC_SISTER_CHROMATID_SEGREGATION	go_positive_regulation_of_mitotic_sister_chromatid_segregation	GO_POSITIVE_REGULATION_OF_MITOTIC_SISTER_CHROMATID_SEGREGATION		21	0.64173	1.64588	0.0170213	0.0936387	0.932	6539	tags=52%, list=12%, signal=59%
GO_CHAPERONE_MEDIATED_AUTOPHAGY	go_chaperone_mediated_autophagy	GO_CHAPERONE_MEDIATED_AUTOPHAGY		16	0.608918	1.64579	0.0280561	0.0935204	0.932	5372	tags=44%, list=10%, signal=48%
GO_AUTOPHAGOSOME_MATURATION	go_autophagosome_maturation	GO_AUTOPHAGOSOME_MATURATION		40	0.539589	1.64507	0.0221328	0.0938414	0.932	5036	tags=40%, list=9%, signal=44%
GO_POSITIVE_REGULATION_OF_PROTEIN_AUTOPHOSPHORYLATION	go_positive_regulation_of_protein_autophosphorylation	GO_POSITIVE_REGULATION_OF_PROTEIN_AUTOPHOSPHORYLATION		27	0.597538	1.64481	0.0301811	0.0938714	0.932	5590	tags=44%, list=10%, signal=49%
GO_NEGATIVE_REGULATION_OF_OXIDATIVE_STRESS_INDUCED_NEURON_DEATH	go_negative_regulation_of_oxidative_stress_induced_neuron_death	GO_NEGATIVE_REGULATION_OF_OXIDATIVE_STRESS_INDUCED_NEURON_DEATH		20	0.565508	1.64453	0.00616016	0.0938622	0.932	4670	tags=40%, list=8%, signal=44%
GO_REGULATION_OF_CHROMOSOME_ORGANIZATION	go_regulation_of_chromosome_organization	GO_REGULATION_OF_CHROMOSOME_ORGANIZATION		340	0.482245	1.6444	0.0382166	0.0937925	0.932	5835	tags=37%, list=11%, signal=41%
GO_FIBROBLAST_MIGRATION	go_fibroblast_migration	GO_FIBROBLAST_MIGRATION		44	0.531901	1.644	0.0422535	0.0939036	0.933	8345	tags=50%, list=15%, signal=59%
GO_REGULATION_OF_PROTEIN_LOCALIZATION_TO_MEMBRANE	go_regulation_of_protein_localization_to_membrane	GO_REGULATION_OF_PROTEIN_LOCALIZATION_TO_MEMBRANE		193	0.416222	1.64302	0.0162602	0.0943641	0.934	6680	tags=32%, list=12%, signal=36%
GO_PLACENTA_BLOOD_VESSEL_DEVELOPMENT	go_placenta_blood_vessel_development	GO_PLACENTA_BLOOD_VESSEL_DEVELOPMENT		34	0.509473	1.6428	0.0201207	0.0943647	0.934	5020	tags=32%, list=9%, signal=36%
GO_NEGATIVE_REGULATION_OF_CHROMOSOME_ORGANIZATION	go_negative_regulation_of_chromosome_organization	GO_NEGATIVE_REGULATION_OF_CHROMOSOME_ORGANIZATION		134	0.505255	1.64264	0.04375	0.0942963	0.934	5473	tags=41%, list=10%, signal=45%
GO_POSITIVE_REGULATION_OF_PROTEIN_LOCALIZATION_TO_NUCLEUS	go_positive_regulation_of_protein_localization_to_nucleus	GO_POSITIVE_REGULATION_OF_PROTEIN_LOCALIZATION_TO_NUCLEUS		80	0.488639	1.64253	0.0310559	0.0941839	0.934	5981	tags=38%, list=11%, signal=42%
GO_ACTIVATION_OF_PROTEIN_KINASE_ACTIVITY	go_activation_of_protein_kinase_activity	GO_ACTIVATION_OF_PROTEIN_KINASE_ACTIVITY		328	0.42288	1.64252	0.022869	0.0940143	0.934	6178	tags=33%, list=11%, signal=37%
GO_NEURON_MIGRATION	go_neuron_migration	GO_NEURON_MIGRATION		164	0.457367	1.64239	0.01222	0.0939155	0.934	5685	tags=28%, list=10%, signal=31%
GO_REGULATION_OF_PEPTIDYL_TYROSINE_PHOSPHORYLATION	go_regulation_of_peptidyl_tyrosine_phosphorylation	GO_REGULATION_OF_PEPTIDYL_TYROSINE_PHOSPHORYLATION		258	0.432988	1.64233	0.0186335	0.0937807	0.934	3575	tags=23%, list=6%, signal=25%
GO_REGULATION_OF_PROTEASOMAL_UBIQUITIN_DEPENDENT_PROTEIN_CATABOLIC_PROCESS	go_regulation_of_proteasomal_ubiquitin_dependent_protein_catabolic_process	GO_REGULATION_OF_PROTEASOMAL_UBIQUITIN_DEPENDENT_PROTEIN_CATABOLIC_PROCESS		130	0.452169	1.64133	0.0163934	0.0943598	0.936	5480	tags=34%, list=10%, signal=37%
GO_REGULATION_OF_MITOTIC_SPINDLE_ASSEMBLY	go_regulation_of_mitotic_spindle_assembly	GO_REGULATION_OF_MITOTIC_SPINDLE_ASSEMBLY		17	0.619093	1.641	0.0285714	0.094412	0.937	4269	tags=47%, list=8%, signal=51%
GO_REGULATION_OF_MAP_KINASE_ACTIVITY	go_regulation_of_map_kinase_activity	GO_REGULATION_OF_MAP_KINASE_ACTIVITY		339	0.423773	1.64076	0.0187891	0.0944385	0.937	6119	tags=34%, list=11%, signal=38%
GO_POSITIVE_REGULATION_OF_VIRAL_PROCESS	go_positive_regulation_of_viral_process	GO_POSITIVE_REGULATION_OF_VIRAL_PROCESS		107	0.465242	1.64069	0.0222222	0.0943079	0.937	6560	tags=43%, list=12%, signal=49%
GO_POSITIVE_REGULATION_OF_MAP_KINASE_ACTIVITY	go_positive_regulation_of_map_kinase_activity	GO_POSITIVE_REGULATION_OF_MAP_KINASE_ACTIVITY		261	0.431591	1.6404	0.0229645	0.0943076	0.937	6119	tags=34%, list=11%, signal=38%
GO_MEMBRANE_LIPID_BIOSYNTHETIC_PROCESS	go_membrane_lipid_biosynthetic_process	GO_MEMBRANE_LIPID_BIOSYNTHETIC_PROCESS		143	0.4343	1.64036	0.02537	0.0941613	0.937	7029	tags=38%, list=13%, signal=44%
GO_ESTABLISHMENT_OF_MITOTIC_SPINDLE_LOCALIZATION	go_establishment_of_mitotic_spindle_localization	GO_ESTABLISHMENT_OF_MITOTIC_SPINDLE_LOCALIZATION		35	0.596107	1.63993	0.0394191	0.0942628	0.938	5782	tags=46%, list=10%, signal=51%
GO_ACTIN_CYTOSKELETON_REORGANIZATION	go_actin_cytoskeleton_reorganization	GO_ACTIN_CYTOSKELETON_REORGANIZATION		105	0.471248	1.6399	0.0221774	0.0941079	0.938	5648	tags=36%, list=10%, signal=40%
GO_CELLULAR_RESPONSE_TO_INSULIN_STIMULUS	go_cellular_response_to_insulin_stimulus	GO_CELLULAR_RESPONSE_TO_INSULIN_STIMULUS		224	0.421841	1.63976	0.00627615	0.0940524	0.938	6829	tags=37%, list=12%, signal=42%
GO_POSITIVE_REGULATION_OF_CELLULAR_RESPONSE_TO_INSULIN_STIMULUS	go_positive_regulation_of_cellular_response_to_insulin_stimulus	GO_POSITIVE_REGULATION_OF_CELLULAR_RESPONSE_TO_INSULIN_STIMULUS		27	0.545203	1.63958	0.0164948	0.0940132	0.939	7211	tags=44%, list=13%, signal=51%
GO_NEGATIVE_REGULATION_OF_DEPHOSPHORYLATION	go_negative_regulation_of_dephosphorylation	GO_NEGATIVE_REGULATION_OF_DEPHOSPHORYLATION		111	0.442236	1.63944	0.014862	0.0939511	0.939	5991	tags=37%, list=11%, signal=41%
GO_MODULATION_OF_EXCITATORY_POSTSYNAPTIC_POTENTIAL	go_modulation_of_excitatory_postsynaptic_potential	GO_MODULATION_OF_EXCITATORY_POSTSYNAPTIC_POTENTIAL		45	0.501105	1.63942	0.0178571	0.093786	0.939	8193	tags=51%, list=15%, signal=60%
GO_TRANSFORMING_GROWTH_FACTOR_BETA_RECEPTOR_SIGNALING_PATHWAY	go_transforming_growth_factor_beta_receptor_signaling_pathway	GO_TRANSFORMING_GROWTH_FACTOR_BETA_RECEPTOR_SIGNALING_PATHWAY		199	0.439023	1.63902	0.0306748	0.0939162	0.939	6951	tags=39%, list=13%, signal=45%
GO_ACTIVATION_OF_GTPASE_ACTIVITY	go_activation_of_gtpase_activity	GO_ACTIVATION_OF_GTPASE_ACTIVITY		107	0.466881	1.63797	0.0331384	0.0944826	0.94	5192	tags=36%, list=9%, signal=39%
GO_REGULATION_OF_GTPASE_ACTIVITY	go_regulation_of_gtpase_activity	GO_REGULATION_OF_GTPASE_ACTIVITY		472	0.43575	1.63781	0.0265306	0.0944101	0.94	6081	tags=36%, list=11%, signal=40%
GO_CELLULAR_RESPONSE_TO_DSRNA	go_cellular_response_to_dsrna	GO_CELLULAR_RESPONSE_TO_DSRNA		21	0.598691	1.63777	0.0273109	0.0942561	0.94	9344	tags=52%, list=17%, signal=63%
GO_RECEPTOR_METABOLIC_PROCESS	go_receptor_metabolic_process	GO_RECEPTOR_METABOLIC_PROCESS		198	0.420665	1.63746	0.0165631	0.0942821	0.94	6226	tags=34%, list=11%, signal=38%
GO_SPHINGOID_METABOLIC_PROCESS	go_sphingoid_metabolic_process	GO_SPHINGOID_METABOLIC_PROCESS		21	0.59003	1.63726	0.012474	0.0942638	0.94	6812	tags=52%, list=12%, signal=60%
GO_EXTRACELLULAR_VESICLE_BIOGENESIS	go_extracellular_vesicle_biogenesis	GO_EXTRACELLULAR_VESICLE_BIOGENESIS		22	0.508458	1.63621	0.0102881	0.0948416	0.94	2956	tags=36%, list=5%, signal=38%
GO_NEGATIVE_REGULATION_OF_PROTEASOMAL_UBIQUITIN_DEPENDENT_PROTEIN_CATABOLIC_PROCESS	go_negative_regulation_of_proteasomal_ubiquitin_dependent_protein_catabolic_process	GO_NEGATIVE_REGULATION_OF_PROTEASOMAL_UBIQUITIN_DEPENDENT_PROTEIN_CATABOLIC_PROCESS		35	0.517576	1.63587	0.0355731	0.0949092	0.941	4739	tags=43%, list=9%, signal=47%
GO_TELENCEPHALON_GLIAL_CELL_MIGRATION	go_telencephalon_glial_cell_migration	GO_TELENCEPHALON_GLIAL_CELL_MIGRATION		23	0.589622	1.63539	0.0227743	0.0950447	0.941	5288	tags=48%, list=10%, signal=53%
GO_CELLULAR_RESPONSE_TO_ABIOTIC_STIMULUS	go_cellular_response_to_abiotic_stimulus	GO_CELLULAR_RESPONSE_TO_ABIOTIC_STIMULUS		326	0.417414	1.63478	0.0193133	0.0953345	0.942	4062	tags=28%, list=7%, signal=30%
GO_OVULATION	go_ovulation	GO_OVULATION		21	0.612873	1.6345	0.0400844	0.0953509	0.942	8736	tags=52%, list=16%, signal=62%
GO_POSITIVE_REGULATION_OF_ACTIN_NUCLEATION	go_positive_regulation_of_actin_nucleation	GO_POSITIVE_REGULATION_OF_ACTIN_NUCLEATION		16	0.62852	1.63448	0.025	0.0951874	0.942	4383	tags=56%, list=8%, signal=61%
GO_POSITIVE_REGULATION_OF_I_KAPPAB_KINASE_NF_KAPPAB_SIGNALING	go_positive_regulation_of_i_kappab_kinase_nf_kappab_signaling	GO_POSITIVE_REGULATION_OF_I_KAPPAB_KINASE_NF_KAPPAB_SIGNALING		188	0.484468	1.63406	0.026087	0.0953538	0.943	5561	tags=36%, list=10%, signal=40%
GO_NEGATIVE_REGULATION_OF_CELLULAR_COMPONENT_MOVEMENT	go_negative_regulation_of_cellular_component_movement	GO_NEGATIVE_REGULATION_OF_CELLULAR_COMPONENT_MOVEMENT		366	0.404929	1.63395	0.020284	0.0952485	0.943	5135	tags=26%, list=9%, signal=29%
GO_REGULATION_OF_DEVELOPMENTAL_GROWTH	go_regulation_of_developmental_growth	GO_REGULATION_OF_DEVELOPMENTAL_GROWTH		347	0.417297	1.63357	0.012474	0.0952858	0.943	5876	tags=31%, list=11%, signal=35%
GO_REGULATION_OF_RNA_EXPORT_FROM_NUCLEUS	go_regulation_of_rna_export_from_nucleus	GO_REGULATION_OF_RNA_EXPORT_FROM_NUCLEUS		16	0.7596	1.63317	0.0060241	0.0952192	0.944	6943	tags=69%, list=13%, signal=79%
GO_REGULATION_OF_HISTONE_MODIFICATION	go_regulation_of_histone_modification	GO_REGULATION_OF_HISTONE_MODIFICATION		146	0.483123	1.63302	0.0292276	0.0951379	0.944	6474	tags=38%, list=12%, signal=43%
GO_REGULATION_OF_NON_CANONICAL_WNT_SIGNALING_PATHWAY	go_regulation_of_non_canonical_wnt_signaling_pathway	GO_REGULATION_OF_NON_CANONICAL_WNT_SIGNALING_PATHWAY		23	0.572169	1.63255	0.0230126	0.0952817	0.944	3847	tags=39%, list=7%, signal=42%
GO_NEGATIVE_REGULATION_OF_MORPHOGENESIS_OF_AN_EPITHELIUM	go_negative_regulation_of_morphogenesis_of_an_epithelium	GO_NEGATIVE_REGULATION_OF_MORPHOGENESIS_OF_AN_EPITHELIUM		16	0.633137	1.63244	0.0220884	0.0951995	0.944	7708	tags=69%, list=14%, signal=80%
GO_HISTONE_UBIQUITINATION	go_histone_ubiquitination	GO_HISTONE_UBIQUITINATION		48	0.559064	1.63186	0.0207039	0.0954809	0.944	7900	tags=60%, list=14%, signal=70%
GO_REGULATION_OF_INTRACELLULAR_TRANSPORT	go_regulation_of_intracellular_transport	GO_REGULATION_OF_INTRACELLULAR_TRANSPORT		351	0.427281	1.6312	0.0192308	0.0957659	0.944	5999	tags=36%, list=11%, signal=40%
GO_NUCLEOSOME_ORGANIZATION	go_nucleosome_organization	GO_NUCLEOSOME_ORGANIZATION		111	0.509689	1.63085	0.0349076	0.0958312	0.944	6538	tags=43%, list=12%, signal=49%
GO_COCHLEA_DEVELOPMENT	go_cochlea_development	GO_COCHLEA_DEVELOPMENT		51	0.463205	1.63027	0.0104384	0.0959709	0.944	3143	tags=25%, list=6%, signal=27%
GO_MRNA_TRANSPORT	go_mrna_transport	GO_MRNA_TRANSPORT		150	0.514339	1.62969	0.0306122	0.0962388	0.944	5279	tags=39%, list=10%, signal=43%
GO_POSITIVE_REGULATION_OF_ERBB_SIGNALING_PATHWAY	go_positive_regulation_of_erbb_signaling_pathway	GO_POSITIVE_REGULATION_OF_ERBB_SIGNALING_PATHWAY		38	0.52539	1.62853	0.0107296	0.0969378	0.949	5020	tags=32%, list=9%, signal=35%
GO_HISTONE_H3_K9_MODIFICATION	go_histone_h3_k9_modification	GO_HISTONE_H3_K9_MODIFICATION		48	0.56901	1.62805	0.0454545	0.0971372	0.949	5274	tags=46%, list=10%, signal=51%
GO_CELL_GROWTH	go_cell_growth	GO_CELL_GROWTH		476	0.396554	1.62797	0.0162933	0.0970264	0.949	5816	tags=31%, list=11%, signal=34%
GO_ANATOMICAL_STRUCTURE_HOMEOSTASIS	go_anatomical_structure_homeostasis	GO_ANATOMICAL_STRUCTURE_HOMEOSTASIS		452	0.405725	1.62773	0.0189474	0.0970234	0.949	5791	tags=31%, list=10%, signal=34%
GO_CLATHRIN_DEPENDENT_ENDOCYTOSIS	go_clathrin_dependent_endocytosis	GO_CLATHRIN_DEPENDENT_ENDOCYTOSIS		45	0.524236	1.62719	0.0394477	0.097226	0.95	7504	tags=58%, list=14%, signal=67%
GO_PEPTIDYL_TYROSINE_AUTOPHOSPHORYLATION	go_peptidyl_tyrosine_autophosphorylation	GO_PEPTIDYL_TYROSINE_AUTOPHOSPHORYLATION		41	0.529837	1.62633	0.0211864	0.0976481	0.95	6357	tags=41%, list=12%, signal=47%
GO_REGULATION_OF_RESPONSE_TO_INTERFERON_GAMMA	go_regulation_of_response_to_interferon_gamma	GO_REGULATION_OF_RESPONSE_TO_INTERFERON_GAMMA		25	0.582399	1.62383	0.0330578	0.0992691	0.952	4667	tags=36%, list=8%, signal=39%
GO_HEPATOCYTE_GROWTH_FACTOR_RECEPTOR_SIGNALING_PATHWAY	go_hepatocyte_growth_factor_receptor_signaling_pathway	GO_HEPATOCYTE_GROWTH_FACTOR_RECEPTOR_SIGNALING_PATHWAY		16	0.590318	1.62333	0.0264228	0.0995004	0.952	3155	tags=25%, list=6%, signal=27%
GO_NEGATIVE_REGULATION_OF_CELLULAR_SENESCENCE	go_negative_regulation_of_cellular_senescence	GO_NEGATIVE_REGULATION_OF_CELLULAR_SENESCENCE		22	0.587001	1.62295	0.0334029	0.0996048	0.952	4637	tags=41%, list=8%, signal=45%
GO_POSITIVE_REGULATION_OF_INTERFERON_ALPHA_PRODUCTION	go_positive_regulation_of_interferon_alpha_production	GO_POSITIVE_REGULATION_OF_INTERFERON_ALPHA_PRODUCTION		20	0.671656	1.62282	0.0409836	0.099516	0.952	5672	tags=45%, list=10%, signal=50%
GO_NEGATIVE_REGULATION_OF_TELOMERE_MAINTENANCE_VIA_TELOMERASE	go_negative_regulation_of_telomere_maintenance_via_telomerase	GO_NEGATIVE_REGULATION_OF_TELOMERE_MAINTENANCE_VIA_TELOMERASE		20	0.6372	1.6223	0.0355649	0.0997263	0.953	5365	tags=60%, list=10%, signal=66%
GO_LOCOMOTORY_BEHAVIOR	go_locomotory_behavior	GO_LOCOMOTORY_BEHAVIOR		197	0.408363	1.62195	0.00196464	0.0998208	0.953	6829	tags=34%, list=12%, signal=38%
GO_POSITIVE_REGULATION_OF_EXTRINSIC_APOPTOTIC_SIGNALING_PATHWAY_VIA_DEATH_DOMAIN_RECEPTORS	go_positive_regulation_of_extrinsic_apoptotic_signaling_pathway_via_death_domain_receptors	GO_POSITIVE_REGULATION_OF_EXTRINSIC_APOPTOTIC_SIGNALING_PATHWAY_VIA_DEATH_DOMAIN_RECEPTORS		15	0.641212	1.6218	0.038	0.0997793	0.953	7832	tags=53%, list=14%, signal=62%
GO_CELLULAR_RESPONSE_TO_PEPTIDE	go_cellular_response_to_peptide	GO_CELLULAR_RESPONSE_TO_PEPTIDE		394	0.403799	1.6213	0.00849257	0.0999987	0.953	6596	tags=33%, list=12%, signal=37%
GO_CELL_CYCLE_CHECKPOINT	go_cell_cycle_checkpoint	GO_CELL_CYCLE_CHECKPOINT		217	0.491966	1.62108	0.034632	0.0999623	0.953	6279	tags=37%, list=11%, signal=42%
GO_MITOTIC_DNA_INTEGRITY_CHECKPOINT	go_mitotic_dna_integrity_checkpoint	GO_MITOTIC_DNA_INTEGRITY_CHECKPOINT		107	0.511402	1.62098	0.0421053	0.0998818	0.953	8505	tags=45%, list=15%, signal=53%
GO_N_GLYCAN_PROCESSING	go_n_glycan_processing	GO_N_GLYCAN_PROCESSING		18	0.587359	1.62013	0.0306122	0.100312	0.953	4318	tags=39%, list=8%, signal=42%
GO_REGULATION_OF_CELL_CYCLE_PHASE_TRANSITION	go_regulation_of_cell_cycle_phase_transition	GO_REGULATION_OF_CELL_CYCLE_PHASE_TRANSITION		469	0.431938	1.61997	0.0272537	0.100252	0.953	6279	tags=33%, list=11%, signal=37%
GO_REGULATION_OF_CELL_MATRIX_ADHESION	go_regulation_of_cell_matrix_adhesion	GO_REGULATION_OF_CELL_MATRIX_ADHESION		120	0.47079	1.61861	0.0327198	0.101204	0.955	8126	tags=44%, list=15%, signal=52%
GO_CELLULAR_RESPONSE_TO_PEPTIDE_HORMONE_STIMULUS	go_cellular_response_to_peptide_hormone_stimulus	GO_CELLULAR_RESPONSE_TO_PEPTIDE_HORMONE_STIMULUS		327	0.403608	1.61853	0.00616016	0.101082	0.955	6596	tags=33%, list=12%, signal=38%
GO_IMPORT_INTO_NUCLEUS	go_import_into_nucleus	GO_IMPORT_INTO_NUCLEUS		171	0.457085	1.61745	0.0378151	0.101804	0.955	7690	tags=43%, list=14%, signal=50%
GO_PROTEIN_LOCALIZATION_TO_NUCLEUS	go_protein_localization_to_nucleus	GO_PROTEIN_LOCALIZATION_TO_NUCLEUS		276	0.43869	1.61733	0.04	0.101704	0.955	7263	tags=40%, list=13%, signal=46%
GO_REGULATION_OF_PROTEIN_DEPOLYMERIZATION	go_regulation_of_protein_depolymerization	GO_REGULATION_OF_PROTEIN_DEPOLYMERIZATION		86	0.470782	1.61731	0.0299401	0.101549	0.955	5443	tags=34%, list=10%, signal=37%
GO_RNA_POLYADENYLATION	go_rna_polyadenylation	GO_RNA_POLYADENYLATION		48	0.590803	1.61644	0.0277186	0.101993	0.955	5365	tags=54%, list=10%, signal=60%
GO_ATRIAL_SEPTUM_MORPHOGENESIS	go_atrial_septum_morphogenesis	GO_ATRIAL_SEPTUM_MORPHOGENESIS		15	0.594199	1.61641	0.0213592	0.101834	0.955	2985	tags=40%, list=5%, signal=42%
GO_VACUOLE_ORGANIZATION	go_vacuole_organization	GO_VACUOLE_ORGANIZATION		171	0.458889	1.61631	0.0173536	0.101756	0.955	5889	tags=39%, list=11%, signal=44%
GO_BRANCHING_INVOLVED_IN_MAMMARY_GLAND_DUCT_MORPHOGENESIS	go_branching_involved_in_mammary_gland_duct_morphogenesis	GO_BRANCHING_INVOLVED_IN_MAMMARY_GLAND_DUCT_MORPHOGENESIS		24	0.555414	1.6162	0.0323232	0.101671	0.955	7911	tags=54%, list=14%, signal=63%
GO_RNA_DESTABILIZATION	go_rna_destabilization	GO_RNA_DESTABILIZATION		35	0.569903	1.61609	0.0387755	0.101578	0.955	4183	tags=40%, list=8%, signal=43%
GO_POSITIVE_REGULATION_OF_NITRIC_OXIDE_SYNTHASE_ACTIVITY	go_positive_regulation_of_nitric_oxide_synthase_activity	GO_POSITIVE_REGULATION_OF_NITRIC_OXIDE_SYNTHASE_ACTIVITY		22	0.556873	1.61568	0.0303644	0.101685	0.955	5975	tags=41%, list=11%, signal=46%
GO_PROTEIN_K48_LINKED_DEUBIQUITINATION	go_protein_k48_linked_deubiquitination	GO_PROTEIN_K48_LINKED_DEUBIQUITINATION		36	0.578273	1.615	0.0256917	0.102079	0.955	6399	tags=53%, list=12%, signal=60%
GO_GOLGI_TO_ENDOSOME_TRANSPORT	go_golgi_to_endosome_transport	GO_GOLGI_TO_ENDOSOME_TRANSPORT		17	0.6702	1.61463	0.0334728	0.102199	0.955	3781	tags=59%, list=7%, signal=63%
GO_POSITIVE_REGULATION_OF_RESPONSE_TO_CYTOKINE_STIMULUS	go_positive_regulation_of_response_to_cytokine_stimulus	GO_POSITIVE_REGULATION_OF_RESPONSE_TO_CYTOKINE_STIMULUS		57	0.544998	1.61444	0.0444915	0.102182	0.956	4761	tags=35%, list=9%, signal=38%
GO_REGULATION_OF_SYNAPTIC_VESICLE_RECYCLING	go_regulation_of_synaptic_vesicle_recycling	GO_REGULATION_OF_SYNAPTIC_VESICLE_RECYCLING		25	0.543616	1.61403	0.0190275	0.102325	0.957	6630	tags=52%, list=12%, signal=59%
GO_POSITIVE_REGULATION_OF_PROTEOLYSIS_INVOLVED_IN_CELLULAR_PROTEIN_CATABOLIC_PROCESS	go_positive_regulation_of_proteolysis_involved_in_cellular_protein_catabolic_process	GO_POSITIVE_REGULATION_OF_PROTEOLYSIS_INVOLVED_IN_CELLULAR_PROTEIN_CATABOLIC_PROCESS		126	0.433573	1.61321	0.0144928	0.102789	0.957	5480	tags=32%, list=10%, signal=35%
GO_RESPONSE_TO_OSMOTIC_STRESS	go_response_to_osmotic_stress	GO_RESPONSE_TO_OSMOTIC_STRESS		85	0.443129	1.61317	0.0242424	0.102644	0.957	5931	tags=35%, list=11%, signal=39%
GO_REGULATION_OF_TRANSCRIPTION_INITIATION_FROM_RNA_POLYMERASE_II_PROMOTER	go_regulation_of_transcription_initiation_from_rna_polymerase_ii_promoter	GO_REGULATION_OF_TRANSCRIPTION_INITIATION_FROM_RNA_POLYMERASE_II_PROMOTER		37	0.531788	1.61267	0.0201207	0.102895	0.957	6431	tags=49%, list=12%, signal=55%
GO_RESPONSE_TO_INTERLEUKIN_4	go_response_to_interleukin_4	GO_RESPONSE_TO_INTERLEUKIN_4		35	0.560665	1.6125	0.035865	0.102879	0.957	3797	tags=34%, list=7%, signal=37%
GO_REGULATION_OF_CELL_DIVISION	go_regulation_of_cell_division	GO_REGULATION_OF_CELL_DIVISION		171	0.439409	1.61167	0.0194805	0.103377	0.958	5753	tags=31%, list=10%, signal=34%
GO_REGULATION_OF_NITRIC_OXIDE_SYNTHASE_ACTIVITY	go_regulation_of_nitric_oxide_synthase_activity	GO_REGULATION_OF_NITRIC_OXIDE_SYNTHASE_ACTIVITY		52	0.460611	1.61026	0.0163265	0.104099	0.959	3662	tags=27%, list=7%, signal=29%
GO_MEMBRANE_LIPID_METABOLIC_PROCESS	go_membrane_lipid_metabolic_process	GO_MEMBRANE_LIPID_METABOLIC_PROCESS		208	0.407024	1.60987	0.0226804	0.104206	0.96	7029	tags=36%, list=13%, signal=41%
GO_REGULATION_OF_PROTEIN_CONTAINING_COMPLEX_DISASSEMBLY	go_regulation_of_protein_containing_complex_disassembly	GO_REGULATION_OF_PROTEIN_CONTAINING_COMPLEX_DISASSEMBLY		119	0.469848	1.60912	0.0349794	0.1046	0.96	5480	tags=34%, list=10%, signal=37%
GO_CYTOKINETIC_PROCESS	go_cytokinetic_process	GO_CYTOKINETIC_PROCESS		39	0.544921	1.60909	0.0268595	0.104437	0.96	5753	tags=49%, list=10%, signal=54%
GO_PEPTIDYL_SERINE_MODIFICATION	go_peptidyl_serine_modification	GO_PEPTIDYL_SERINE_MODIFICATION		330	0.420922	1.6083	0.0368852	0.104843	0.96	6949	tags=36%, list=13%, signal=41%
GO_AUTOPHAGOSOME_ORGANIZATION	go_autophagosome_organization	GO_AUTOPHAGOSOME_ORGANIZATION		97	0.48813	1.60754	0.0291667	0.105314	0.96	5889	tags=41%, list=11%, signal=46%
GO_ACTOMYOSIN_STRUCTURE_ORGANIZATION	go_actomyosin_structure_organization	GO_ACTOMYOSIN_STRUCTURE_ORGANIZATION		195	0.469681	1.6071	0.0200803	0.105443	0.96	5795	tags=33%, list=10%, signal=37%
GO_MRNA_TRANSCRIPTION	go_mrna_transcription	GO_MRNA_TRANSCRIPTION		17	0.605104	1.60652	0.038835	0.105697	0.961	4475	tags=41%, list=8%, signal=45%
GO_REGENERATION	go_regeneration	GO_REGENERATION		198	0.413937	1.60646	0.027027	0.10556	0.961	5691	tags=29%, list=10%, signal=33%
GO_REGULATION_OF_MEMBRANE_LIPID_DISTRIBUTION	go_regulation_of_membrane_lipid_distribution	GO_REGULATION_OF_MEMBRANE_LIPID_DISTRIBUTION		52	0.469045	1.60643	0.0248963	0.105407	0.961	7480	tags=44%, list=14%, signal=51%
GO_OSTEOCLAST_DEVELOPMENT	go_osteoclast_development	GO_OSTEOCLAST_DEVELOPMENT		18	0.609168	1.60624	0.0359408	0.105396	0.961	4504	tags=39%, list=8%, signal=42%
GO_MRNA_3_END_PROCESSING	go_mrna_3_end_processing	GO_MRNA_3_END_PROCESSING		101	0.545311	1.60623	0.0271399	0.105237	0.961	8316	tags=54%, list=15%, signal=64%
GO_PLATELET_DEGRANULATION	go_platelet_degranulation	GO_PLATELET_DEGRANULATION		128	0.434575	1.60541	0.030303	0.105666	0.961	4605	tags=27%, list=8%, signal=29%
GO_REGULATION_OF_CELL_JUNCTION_ASSEMBLY	go_regulation_of_cell_junction_assembly	GO_REGULATION_OF_CELL_JUNCTION_ASSEMBLY		200	0.43222	1.60512	0.0264228	0.105697	0.961	5250	tags=29%, list=9%, signal=32%
GO_TRNA_TRANSPORT	go_trna_transport	GO_TRNA_TRANSPORT		36	0.640232	1.60497	0.0454545	0.105619	0.961	6688	tags=53%, list=12%, signal=60%
GO_NEGATIVE_REGULATION_OF_VIRAL_TRANSCRIPTION	go_negative_regulation_of_viral_transcription	GO_NEGATIVE_REGULATION_OF_VIRAL_TRANSCRIPTION		27	0.548947	1.60462	0.0455487	0.105687	0.961	5223	tags=44%, list=9%, signal=49%
GO_WALKING_BEHAVIOR	go_walking_behavior	GO_WALKING_BEHAVIOR		29	0.500778	1.60368	0.00811359	0.106055	0.961	2487	tags=24%, list=4%, signal=25%
GO_MACROAUTOPHAGY	go_macroautophagy	GO_MACROAUTOPHAGY		307	0.453355	1.60366	0.0129032	0.105894	0.961	5889	tags=39%, list=11%, signal=44%
GO_PHOSPHATIDYLINOSITOL_BIOSYNTHETIC_PROCESS	go_phosphatidylinositol_biosynthetic_process	GO_PHOSPHATIDYLINOSITOL_BIOSYNTHETIC_PROCESS		117	0.46589	1.60266	0.0314465	0.106512	0.961	6009	tags=36%, list=11%, signal=40%
GO_POSITIVE_REGULATION_OF_ISOTYPE_SWITCHING	go_positive_regulation_of_isotype_switching	GO_POSITIVE_REGULATION_OF_ISOTYPE_SWITCHING		28	0.554361	1.60251	0.0357895	0.106445	0.961	3169	tags=25%, list=6%, signal=27%
GO_ENDOSOME_ORGANIZATION	go_endosome_organization	GO_ENDOSOME_ORGANIZATION		79	0.476681	1.6024	0.0268595	0.106359	0.961	5258	tags=42%, list=10%, signal=46%
GO_REGULATION_OF_RESPONSE_TO_CYTOKINE_STIMULUS	go_regulation_of_response_to_cytokine_stimulus	GO_REGULATION_OF_RESPONSE_TO_CYTOKINE_STIMULUS		188	0.456928	1.60239	0.0365591	0.10619	0.961	3932	tags=28%, list=7%, signal=30%
GO_POSITIVE_REGULATION_OF_TRANSCRIPTION_OF_NOTCH_RECEPTOR_TARGET	go_positive_regulation_of_transcription_of_notch_receptor_target	GO_POSITIVE_REGULATION_OF_TRANSCRIPTION_OF_NOTCH_RECEPTOR_TARGET		18	0.680137	1.60153	0.0437376	0.106699	0.961	7372	tags=67%, list=13%, signal=77%
GO_POSITIVE_REGULATION_OF_PROTEIN_IMPORT	go_positive_regulation_of_protein_import	GO_POSITIVE_REGULATION_OF_PROTEIN_IMPORT		42	0.50232	1.60117	0.036961	0.106786	0.961	5981	tags=40%, list=11%, signal=45%
GO_NUCLEUS_ORGANIZATION	go_nucleus_organization	GO_NUCLEUS_ORGANIZATION		128	0.482827	1.60062	0.0363248	0.107036	0.961	5245	tags=35%, list=9%, signal=39%
GO_CELL_MATRIX_ADHESION	go_cell_matrix_adhesion	GO_CELL_MATRIX_ADHESION		224	0.444248	1.59886	0.030303	0.108167	0.961	6178	tags=32%, list=11%, signal=36%
GO_AXO_DENDRITIC_TRANSPORT	go_axo_dendritic_transport	GO_AXO_DENDRITIC_TRANSPORT		70	0.4877	1.5985	0.0264228	0.108273	0.962	4909	tags=37%, list=9%, signal=41%
GO_REGULATION_OF_RECEPTOR_RECYCLING	go_regulation_of_receptor_recycling	GO_REGULATION_OF_RECEPTOR_RECYCLING		23	0.553068	1.59835	0.0149254	0.108192	0.963	4322	tags=48%, list=8%, signal=52%
GO_REGULATION_OF_MICROTUBULE_POLYMERIZATION	go_regulation_of_microtubule_polymerization	GO_REGULATION_OF_MICROTUBULE_POLYMERIZATION		51	0.483832	1.59764	0.019685	0.108607	0.963	5245	tags=35%, list=9%, signal=39%
GO_POSITIVE_REGULATION_OF_MRNA_CATABOLIC_PROCESS	go_positive_regulation_of_mrna_catabolic_process	GO_POSITIVE_REGULATION_OF_MRNA_CATABOLIC_PROCESS		50	0.558244	1.59749	0.037422	0.108566	0.963	5913	tags=46%, list=11%, signal=51%
GO_INTRACELLULAR_RECEPTOR_SIGNALING_PATHWAY	go_intracellular_receptor_signaling_pathway	GO_INTRACELLULAR_RECEPTOR_SIGNALING_PATHWAY		265	0.428092	1.59728	0.021645	0.108509	0.963	6678	tags=39%, list=12%, signal=44%
GO_REGULATION_OF_AUTOPHAGOSOME_ASSEMBLY	go_regulation_of_autophagosome_assembly	GO_REGULATION_OF_AUTOPHAGOSOME_ASSEMBLY		36	0.532418	1.59703	0.0210084	0.108502	0.963	5001	tags=47%, list=9%, signal=52%
GO_REGULATION_OF_CELLULAR_RESPONSE_TO_GROWTH_FACTOR_STIMULUS	go_regulation_of_cellular_response_to_growth_factor_stimulus	GO_REGULATION_OF_CELLULAR_RESPONSE_TO_GROWTH_FACTOR_STIMULUS		297	0.412576	1.5967	0.0184805	0.108596	0.963	6178	tags=32%, list=11%, signal=35%
GO_REGULATION_OF_CENTRIOLE_REPLICATION	go_regulation_of_centriole_replication	GO_REGULATION_OF_CENTRIOLE_REPLICATION		23	0.603436	1.59614	0.0384615	0.108869	0.963	4130	tags=43%, list=7%, signal=47%
GO_GLIAL_CELL_PROLIFERATION	go_glial_cell_proliferation	GO_GLIAL_CELL_PROLIFERATION		49	0.474426	1.59491	0.0238612	0.109572	0.963	5781	tags=33%, list=10%, signal=36%
GO_REGULATION_OF_CENTROSOME_DUPLICATION	go_regulation_of_centrosome_duplication	GO_REGULATION_OF_CENTROSOME_DUPLICATION		44	0.536396	1.59484	0.0349794	0.109453	0.963	4269	tags=39%, list=8%, signal=42%
GO_SYNAPTIC_VESICLE_RECYCLING	go_synaptic_vesicle_recycling	GO_SYNAPTIC_VESICLE_RECYCLING		74	0.462781	1.59429	0.025	0.109691	0.964	4046	tags=30%, list=7%, signal=32%
GO_NEURON_RECOGNITION	go_neuron_recognition	GO_NEURON_RECOGNITION		50	0.497172	1.59423	0.0314465	0.109558	0.964	6689	tags=44%, list=12%, signal=50%
GO_POSITIVE_REGULATION_OF_CHROMATIN_ORGANIZATION	go_positive_regulation_of_chromatin_organization	GO_POSITIVE_REGULATION_OF_CHROMATIN_ORGANIZATION		103	0.477514	1.59409	0.0489796	0.109483	0.964	5545	tags=35%, list=10%, signal=39%
GO_VASCULAR_ASSOCIATED_SMOOTH_MUSCLE_CELL_MIGRATION	go_vascular_associated_smooth_muscle_cell_migration	GO_VASCULAR_ASSOCIATED_SMOOTH_MUSCLE_CELL_MIGRATION		36	0.502518	1.59395	0.0382294	0.109416	0.964	7211	tags=33%, list=13%, signal=38%
GO_RECEPTOR_RECYCLING	go_receptor_recycling	GO_RECEPTOR_RECYCLING		34	0.495987	1.59394	0.0263158	0.109246	0.964	5258	tags=47%, list=10%, signal=52%
GO_TETRAHYDROFOLATE_METABOLIC_PROCESS	go_tetrahydrofolate_metabolic_process	GO_TETRAHYDROFOLATE_METABOLIC_PROCESS		19	0.586316	1.59354	0.0316456	0.109398	0.964	7718	tags=53%, list=14%, signal=61%
GO_POSITIVE_REGULATION_OF_MITOTIC_NUCLEAR_DIVISION	go_positive_regulation_of_mitotic_nuclear_division	GO_POSITIVE_REGULATION_OF_MITOTIC_NUCLEAR_DIVISION		56	0.472963	1.5932	0.0282258	0.109501	0.964	6812	tags=34%, list=12%, signal=39%
GO_NEURON_DEATH	go_neuron_death	GO_NEURON_DEATH		357	0.393574	1.593	0.0226337	0.10948	0.964	5666	tags=30%, list=10%, signal=33%
GO_POSITIVE_REGULATION_OF_BONE_RESORPTION	go_positive_regulation_of_bone_resorption	GO_POSITIVE_REGULATION_OF_BONE_RESORPTION		19	0.58507	1.59278	0.026971	0.109492	0.964	2819	tags=26%, list=5%, signal=28%
GO_POST_EMBRYONIC_DEVELOPMENT	go_post_embryonic_development	GO_POST_EMBRYONIC_DEVELOPMENT		84	0.476677	1.59243	0.0329218	0.109601	0.964	5487	tags=38%, list=10%, signal=42%
GO_KERATINOCYTE_PROLIFERATION	go_keratinocyte_proliferation	GO_KERATINOCYTE_PROLIFERATION		49	0.50881	1.59234	0.0289256	0.109511	0.964	5863	tags=35%, list=11%, signal=39%
GO_PROTEIN_LOCALIZATION_TO_CELL_JUNCTION	go_protein_localization_to_cell_junction	GO_PROTEIN_LOCALIZATION_TO_CELL_JUNCTION		104	0.423316	1.59115	0.0159681	0.110236	0.965	6631	tags=37%, list=12%, signal=41%
GO_PEROXISOME_PROLIFERATOR_ACTIVATED_RECEPTOR_SIGNALING_PATHWAY	go_peroxisome_proliferator_activated_receptor_signaling_pathway	GO_PEROXISOME_PROLIFERATOR_ACTIVATED_RECEPTOR_SIGNALING_PATHWAY		21	0.534208	1.59114	0.0225873	0.110073	0.965	4486	tags=43%, list=8%, signal=47%
GO_POSITIVE_REGULATION_OF_MEMBRANE_PROTEIN_ECTODOMAIN_PROTEOLYSIS	go_positive_regulation_of_membrane_protein_ectodomain_proteolysis	GO_POSITIVE_REGULATION_OF_MEMBRANE_PROTEIN_ECTODOMAIN_PROTEOLYSIS		15	0.630142	1.59083	0.038055	0.110192	0.965	5332	tags=40%, list=10%, signal=44%
GO_REGULATION_OF_SYMBIOTIC_PROCESS	go_regulation_of_symbiotic_process	GO_REGULATION_OF_SYMBIOTIC_PROCESS		229	0.424716	1.59061	0.0207469	0.110207	0.965	6347	tags=34%, list=11%, signal=39%
GO_REGULATION_OF_METALLOPEPTIDASE_ACTIVITY	go_regulation_of_metallopeptidase_activity	GO_REGULATION_OF_METALLOPEPTIDASE_ACTIVITY		21	0.540405	1.59054	0.0258449	0.110093	0.965	5929	tags=43%, list=11%, signal=48%
GO_PRESYNAPSE_ORGANIZATION	go_presynapse_organization	GO_PRESYNAPSE_ORGANIZATION		53	0.480492	1.59034	0.0243408	0.110082	0.965	5202	tags=32%, list=9%, signal=35%
GO_REGULATION_OF_CELLULAR_AMIDE_METABOLIC_PROCESS	go_regulation_of_cellular_amide_metabolic_process	GO_REGULATION_OF_CELLULAR_AMIDE_METABOLIC_PROCESS		484	0.402332	1.59019	0.0333333	0.110031	0.965	6350	tags=32%, list=11%, signal=36%
GO_REGULATION_OF_DNA_REPAIR	go_regulation_of_dna_repair	GO_REGULATION_OF_DNA_REPAIR		130	0.480669	1.59017	0.0423729	0.109879	0.965	6686	tags=41%, list=12%, signal=46%
GO_BLASTOCYST_DEVELOPMENT	go_blastocyst_development	GO_BLASTOCYST_DEVELOPMENT		104	0.422772	1.58976	0.0188679	0.11003	0.965	5776	tags=36%, list=10%, signal=40%
GO_POSITIVE_REGULATION_OF_PHOSPHATIDYLINOSITOL_3_KINASE_SIGNALING	go_positive_regulation_of_phosphatidylinositol_3_kinase_signaling	GO_POSITIVE_REGULATION_OF_PHOSPHATIDYLINOSITOL_3_KINASE_SIGNALING		87	0.465173	1.58965	0.0295359	0.109944	0.965	5192	tags=29%, list=9%, signal=32%
GO_VIRAL_RELEASE_FROM_HOST_CELL	go_viral_release_from_host_cell	GO_VIRAL_RELEASE_FROM_HOST_CELL		34	0.532549	1.58935	0.0443975	0.110035	0.965	6141	tags=50%, list=11%, signal=56%
GO_MITOTIC_CHROMOSOME_CONDENSATION	go_mitotic_chromosome_condensation	GO_MITOTIC_CHROMOSOME_CONDENSATION		16	0.654241	1.58841	0.0318725	0.110425	0.966	5311	tags=44%, list=10%, signal=48%
GO_AGING	go_aging	GO_AGING		307	0.383742	1.58782	0.0206612	0.110706	0.966	6053	tags=29%, list=11%, signal=33%
GO_DEVELOPMENT_OF_PRIMARY_SEXUAL_CHARACTERISTICS	go_development_of_primary_sexual_characteristics	GO_DEVELOPMENT_OF_PRIMARY_SEXUAL_CHARACTERISTICS		227	0.405723	1.58774	0.0194805	0.110578	0.966	6302	tags=30%, list=11%, signal=34%
GO_POSITIVE_REGULATION_OF_CELL_DIVISION	go_positive_regulation_of_cell_division	GO_POSITIVE_REGULATION_OF_CELL_DIVISION		87	0.437387	1.58773	0.0226804	0.110417	0.966	4475	tags=26%, list=8%, signal=29%
GO_NEGATIVE_REGULATION_OF_CATABOLIC_PROCESS	go_negative_regulation_of_catabolic_process	GO_NEGATIVE_REGULATION_OF_CATABOLIC_PROCESS		317	0.407997	1.58735	0.031185	0.110404	0.966	6695	tags=35%, list=12%, signal=39%
GO_HISTONE_H4_K5_ACETYLATION	go_histone_h4_k5_acetylation	GO_HISTONE_H4_K5_ACETYLATION		16	0.688252	1.58683	0.0434783	0.110625	0.966	8504	tags=75%, list=15%, signal=89%
GO_REGULATION_OF_PROTEIN_IMPORT	go_regulation_of_protein_import	GO_REGULATION_OF_PROTEIN_IMPORT		62	0.478327	1.58656	0.0398323	0.11068	0.966	5981	tags=42%, list=11%, signal=47%
GO_I_KAPPAB_KINASE_NF_KAPPAB_SIGNALING	go_i_kappab_kinase_nf_kappab_signaling	GO_I_KAPPAB_KINASE_NF_KAPPAB_SIGNALING		283	0.445974	1.5865	0.0456522	0.110548	0.966	6382	tags=35%, list=12%, signal=39%
GO_CELLULAR_RESPONSE_TO_STEROID_HORMONE_STIMULUS	go_cellular_response_to_steroid_hormone_stimulus	GO_CELLULAR_RESPONSE_TO_STEROID_HORMONE_STIMULUS		206	0.422648	1.58631	0.0190275	0.110532	0.966	6596	tags=35%, list=12%, signal=40%
GO_PHOSPHOLIPID_BIOSYNTHETIC_PROCESS	go_phospholipid_biosynthetic_process	GO_PHOSPHOLIPID_BIOSYNTHETIC_PROCESS		269	0.408335	1.5856	0.0168421	0.110908	0.966	5482	tags=29%, list=10%, signal=32%
GO_RESPONSE_TO_AMYLOID_BETA	go_response_to_amyloid_beta	GO_RESPONSE_TO_AMYLOID_BETA		55	0.486755	1.58535	0.0376569	0.110918	0.966	4181	tags=27%, list=8%, signal=29%
GO_EPITHELIAL_CELL_DEVELOPMENT	go_epithelial_cell_development	GO_EPITHELIAL_CELL_DEVELOPMENT		219	0.414224	1.58502	0.0339321	0.111025	0.966	4935	tags=27%, list=9%, signal=30%
GO_PROTEIN_AUTOUBIQUITINATION	go_protein_autoubiquitination	GO_PROTEIN_AUTOUBIQUITINATION		71	0.482373	1.58502	0.0365112	0.110859	0.966	4189	tags=42%, list=8%, signal=46%
GO_DNA_BIOSYNTHETIC_PROCESS	go_dna_biosynthetic_process	GO_DNA_BIOSYNTHETIC_PROCESS		188	0.446028	1.58489	0.0405983	0.110764	0.966	5365	tags=34%, list=10%, signal=38%
GO_PATTERN_RECOGNITION_RECEPTOR_SIGNALING_PATHWAY	go_pattern_recognition_receptor_signaling_pathway	GO_PATTERN_RECOGNITION_RECEPTOR_SIGNALING_PATHWAY		198	0.464828	1.58452	0.0429185	0.110865	0.966	6678	tags=36%, list=12%, signal=41%
GO_GLIOGENESIS	go_gliogenesis	GO_GLIOGENESIS		304	0.395612	1.58446	0.0190678	0.110742	0.966	6018	tags=30%, list=11%, signal=33%
GO_CALCIUM_INDEPENDENT_CELL_CELL_ADHESION_VIA_PLASMA_MEMBRANE_CELL_ADHESION_MOLECULES	go_calcium_independent_cell_cell_adhesion_via_plasma_membrane_cell_adhesion_molecules	GO_CALCIUM_INDEPENDENT_CELL_CELL_ADHESION_VIA_PLASMA_MEMBRANE_CELL_ADHESION_MOLECULES		23	0.547978	1.58418	0.0323887	0.110787	0.967	3457	tags=30%, list=6%, signal=32%
GO_CENTROSOME_DUPLICATION	go_centrosome_duplication	GO_CENTROSOME_DUPLICATION		68	0.527851	1.58386	0.0469388	0.110887	0.967	6073	tags=44%, list=11%, signal=50%
GO_SEX_DIFFERENTIATION	go_sex_differentiation	GO_SEX_DIFFERENTIATION		278	0.398919	1.58304	0.0127932	0.111395	0.968	7276	tags=32%, list=13%, signal=37%
GO_REGULATION_OF_PATTERN_RECOGNITION_RECEPTOR_SIGNALING_PATHWAY	go_regulation_of_pattern_recognition_receptor_signaling_pathway	GO_REGULATION_OF_PATTERN_RECOGNITION_RECEPTOR_SIGNALING_PATHWAY		96	0.475998	1.58269	0.0417537	0.111529	0.968	6678	tags=35%, list=12%, signal=40%
GO_POSITIVE_REGULATION_BY_HOST_OF_VIRAL_TRANSCRIPTION	go_positive_regulation_by_host_of_viral_transcription	GO_POSITIVE_REGULATION_BY_HOST_OF_VIRAL_TRANSCRIPTION		17	0.610966	1.58247	0.0435644	0.111548	0.968	6044	tags=65%, list=11%, signal=73%
GO_RESPONSE_TO_GROWTH_HORMONE	go_response_to_growth_hormone	GO_RESPONSE_TO_GROWTH_HORMONE		39	0.496613	1.58223	0.031185	0.111585	0.968	5746	tags=41%, list=10%, signal=46%
GO_POST_ANAL_TAIL_MORPHOGENESIS	go_post_anal_tail_morphogenesis	GO_POST_ANAL_TAIL_MORPHOGENESIS		19	0.572674	1.58209	0.0386179	0.111509	0.968	3999	tags=32%, list=7%, signal=34%
GO_PHOSPHOLIPID_TRANSPORT	go_phospholipid_transport	GO_PHOSPHOLIPID_TRANSPORT		89	0.423649	1.58163	0.0165975	0.111693	0.968	7480	tags=39%, list=14%, signal=45%
GO_NEGATIVE_REGULATION_OF_NERVOUS_SYSTEM_PROCESS	go_negative_regulation_of_nervous_system_process	GO_NEGATIVE_REGULATION_OF_NERVOUS_SYSTEM_PROCESS		27	0.509486	1.58147	0.0346939	0.111642	0.968	7667	tags=52%, list=14%, signal=60%
GO_PROTEIN_ACYLATION	go_protein_acylation	GO_PROTEIN_ACYLATION		246	0.450094	1.581	0.0395833	0.111841	0.968	5835	tags=37%, list=11%, signal=42%
GO_INTRACELLULAR_STEROID_HORMONE_RECEPTOR_SIGNALING_PATHWAY	go_intracellular_steroid_hormone_receptor_signaling_pathway	GO_INTRACELLULAR_STEROID_HORMONE_RECEPTOR_SIGNALING_PATHWAY		116	0.461338	1.57916	0.0169851	0.113155	0.969	6596	tags=41%, list=12%, signal=46%
GO_TUMOR_NECROSIS_FACTOR_SECRETION	go_tumor_necrosis_factor_secretion	GO_TUMOR_NECROSIS_FACTOR_SECRETION		46	0.489105	1.57873	0.0344828	0.113355	0.97	3643	tags=20%, list=7%, signal=21%
GO_RESPONSE_TO_LEUKEMIA_INHIBITORY_FACTOR	go_response_to_leukemia_inhibitory_factor	GO_RESPONSE_TO_LEUKEMIA_INHIBITORY_FACTOR		97	0.467799	1.57841	0.0426829	0.113437	0.97	8085	tags=44%, list=15%, signal=52%
GO_RESPONSE_TO_INSULIN	go_response_to_insulin	GO_RESPONSE_TO_INSULIN		280	0.394959	1.57821	0.00833333	0.113411	0.97	6922	tags=36%, list=13%, signal=41%
GO_REGULATION_OF_FIBROBLAST_MIGRATION	go_regulation_of_fibroblast_migration	GO_REGULATION_OF_FIBROBLAST_MIGRATION		33	0.532417	1.57797	0.0455487	0.113481	0.97	7365	tags=45%, list=13%, signal=52%
GO_NEGATIVE_REGULATION_OF_VIRAL_PROCESS	go_negative_regulation_of_viral_process	GO_NEGATIVE_REGULATION_OF_VIRAL_PROCESS		101	0.491762	1.577	0.0458515	0.113895	0.97	6141	tags=36%, list=11%, signal=40%
GO_ENTRY_INTO_HOST	go_entry_into_host	GO_ENTRY_INTO_HOST		147	0.46369	1.57694	0.0496894	0.113775	0.97	7331	tags=36%, list=13%, signal=41%
GO_PEPTIDYL_THREONINE_DEPHOSPHORYLATION	go_peptidyl_threonine_dephosphorylation	GO_PEPTIDYL_THREONINE_DEPHOSPHORYLATION		22	0.586625	1.57694	0.0442656	0.113611	0.97	3418	tags=36%, list=6%, signal=39%
GO_REGULATION_OF_REACTIVE_OXYGEN_SPECIES_BIOSYNTHETIC_PROCESS	go_regulation_of_reactive_oxygen_species_biosynthetic_process	GO_REGULATION_OF_REACTIVE_OXYGEN_SPECIES_BIOSYNTHETIC_PROCESS		100	0.42215	1.57688	0.0346939	0.113499	0.97	4253	tags=22%, list=8%, signal=24%
GO_RUFFLE_ORGANIZATION	go_ruffle_organization	GO_RUFFLE_ORGANIZATION		55	0.476481	1.57637	0.0480962	0.113596	0.97	4607	tags=33%, list=8%, signal=36%
GO_POSITIVE_REGULATION_OF_POTASSIUM_ION_TRANSPORT	go_positive_regulation_of_potassium_ion_transport	GO_POSITIVE_REGULATION_OF_POTASSIUM_ION_TRANSPORT		45	0.457256	1.57636	0.0219561	0.113445	0.97	4212	tags=29%, list=8%, signal=31%
GO_GASTRULATION_WITH_MOUTH_FORMING_SECOND	go_gastrulation_with_mouth_forming_second	GO_GASTRULATION_WITH_MOUTH_FORMING_SECOND		27	0.577004	1.57502	0.04	0.11419	0.972	3512	tags=37%, list=6%, signal=40%
GO_PHOSPHATIDYLSERINE_ACYL_CHAIN_REMODELING	go_phosphatidylserine_acyl_chain_remodeling	GO_PHOSPHATIDYLSERINE_ACYL_CHAIN_REMODELING		20	0.55999	1.57413	0.0234542	0.114751	0.973	4729	tags=35%, list=9%, signal=38%
GO_NON_RECOMBINATIONAL_REPAIR	go_non_recombinational_repair	GO_NON_RECOMBINATIONAL_REPAIR		88	0.510063	1.5726	0.0452586	0.115596	0.973	5960	tags=40%, list=11%, signal=45%
GO_NEGATIVE_REGULATION_OF_BINDING	go_negative_regulation_of_binding	GO_NEGATIVE_REGULATION_OF_BINDING		166	0.405455	1.5725	0.0209205	0.115509	0.973	6073	tags=31%, list=11%, signal=34%
GO_REGULATION_OF_DEPHOSPHORYLATION	go_regulation_of_dephosphorylation	GO_REGULATION_OF_DEPHOSPHORYLATION		209	0.416523	1.57235	0.0388548	0.115465	0.973	5991	tags=36%, list=11%, signal=40%
GO_REGULATION_OF_PHOSPHATIDYLINOSITOL_3_KINASE_SIGNALING	go_regulation_of_phosphatidylinositol_3_kinase_signaling	GO_REGULATION_OF_PHOSPHATIDYLINOSITOL_3_KINASE_SIGNALING		124	0.438439	1.57195	0.04	0.115709	0.976	5192	tags=26%, list=9%, signal=28%
GO_POSITIVE_REGULATION_OF_CELL_MORPHOGENESIS_INVOLVED_IN_DIFFERENTIATION	go_positive_regulation_of_cell_morphogenesis_involved_in_differentiation	GO_POSITIVE_REGULATION_OF_CELL_MORPHOGENESIS_INVOLVED_IN_DIFFERENTIATION		157	0.432231	1.57166	0.0451745	0.115792	0.976	5905	tags=35%, list=11%, signal=39%
GO_POSITIVE_REGULATION_OF_CYTOKINESIS	go_positive_regulation_of_cytokinesis	GO_POSITIVE_REGULATION_OF_CYTOKINESIS		40	0.523723	1.5698	0.033195	0.117127	0.976	4130	tags=28%, list=7%, signal=30%
GO_POSITIVE_REGULATION_OF_CELLULAR_AMIDE_METABOLIC_PROCESS	go_positive_regulation_of_cellular_amide_metabolic_process	GO_POSITIVE_REGULATION_OF_CELLULAR_AMIDE_METABOLIC_PROCESS		165	0.415907	1.56954	0.0432099	0.117117	0.976	6053	tags=35%, list=11%, signal=39%
GO_POSITIVE_REGULATION_OF_VIRAL_LIFE_CYCLE	go_positive_regulation_of_viral_life_cycle	GO_POSITIVE_REGULATION_OF_VIRAL_LIFE_CYCLE		61	0.474906	1.56916	0.0393375	0.117242	0.976	5708	tags=41%, list=10%, signal=46%
GO_CANONICAL_WNT_SIGNALING_PATHWAY	go_canonical_wnt_signaling_pathway	GO_CANONICAL_WNT_SIGNALING_PATHWAY		332	0.406277	1.56884	0.020202	0.117382	0.976	6158	tags=31%, list=11%, signal=35%
GO_NEGATIVE_REGULATION_OF_CELLULAR_RESPONSE_TO_TRANSFORMING_GROWTH_FACTOR_BETA_STIMULUS	go_negative_regulation_of_cellular_response_to_transforming_growth_factor_beta_stimulus	GO_NEGATIVE_REGULATION_OF_CELLULAR_RESPONSE_TO_TRANSFORMING_GROWTH_FACTOR_BETA_STIMULUS		87	0.45238	1.56879	0.0471311	0.11725	0.976	6951	tags=40%, list=13%, signal=46%
GO_POSITIVE_REGULATION_OF_CANONICAL_WNT_SIGNALING_PATHWAY	go_positive_regulation_of_canonical_wnt_signaling_pathway	GO_POSITIVE_REGULATION_OF_CANONICAL_WNT_SIGNALING_PATHWAY		148	0.428976	1.56872	0.0383838	0.117138	0.976	7047	tags=36%, list=13%, signal=41%
GO_PROTEIN_LOCALIZATION_TO_POSTSYNAPSE	go_protein_localization_to_postsynapse	GO_PROTEIN_LOCALIZATION_TO_POSTSYNAPSE		47	0.455871	1.5682	0.0188679	0.117409	0.976	6631	tags=40%, list=12%, signal=46%
GO_NEGATIVE_REGULATION_OF_TRANSCRIPTION_REGULATORY_REGION_DNA_BINDING	go_negative_regulation_of_transcription_regulatory_region_dna_binding	GO_NEGATIVE_REGULATION_OF_TRANSCRIPTION_REGULATORY_REGION_DNA_BINDING		21	0.505379	1.56781	0.0335968	0.11756	0.976	5473	tags=43%, list=10%, signal=48%
GO_REGULATION_OF_WATER_LOSS_VIA_SKIN	go_regulation_of_water_loss_via_skin	GO_REGULATION_OF_WATER_LOSS_VIA_SKIN		28	0.523621	1.56777	0.028	0.117429	0.976	6896	tags=50%, list=12%, signal=57%
GO_AXONAL_TRANSPORT	go_axonal_transport	GO_AXONAL_TRANSPORT		59	0.477948	1.567	0.0457256	0.117892	0.976	4909	tags=36%, list=9%, signal=39%
GO_REGULATION_OF_POSTSYNAPTIC_NEUROTRANSMITTER_RECEPTOR_ACTIVITY	go_regulation_of_postsynaptic_neurotransmitter_receptor_activity	GO_REGULATION_OF_POSTSYNAPTIC_NEUROTRANSMITTER_RECEPTOR_ACTIVITY		17	0.577429	1.56649	0.0412574	0.118133	0.977	1170	tags=24%, list=2%, signal=24%
GO_POSITIVE_REGULATION_OF_ESTABLISHMENT_OF_PROTEIN_LOCALIZATION	go_positive_regulation_of_establishment_of_protein_localization	GO_POSITIVE_REGULATION_OF_ESTABLISHMENT_OF_PROTEIN_LOCALIZATION		398	0.393154	1.56579	0.0151515	0.118389	0.977	6053	tags=29%, list=11%, signal=32%
GO_MITOTIC_CYTOKINESIS	go_mitotic_cytokinesis	GO_MITOTIC_CYTOKINESIS		71	0.493617	1.56543	0.0416667	0.118355	0.977	7948	tags=48%, list=14%, signal=56%
GO_POSITIVE_REGULATION_OF_CELL_CYCLE	go_positive_regulation_of_cell_cycle	GO_POSITIVE_REGULATION_OF_CELL_CYCLE		391	0.414429	1.56488	0.0274262	0.118461	0.978	5884	tags=32%, list=11%, signal=35%
GO_RECEPTOR_CLUSTERING	go_receptor_clustering	GO_RECEPTOR_CLUSTERING		56	0.422901	1.56462	0.022869	0.118496	0.978	6631	tags=38%, list=12%, signal=43%
GO_STEROID_HORMONE_MEDIATED_SIGNALING_PATHWAY	go_steroid_hormone_mediated_signaling_pathway	GO_STEROID_HORMONE_MEDIATED_SIGNALING_PATHWAY		139	0.443016	1.56451	0.0308008	0.118435	0.978	6596	tags=40%, list=12%, signal=45%
GO_POSITIVE_REGULATION_OF_TELOMERE_CAPPING	go_positive_regulation_of_telomere_capping	GO_POSITIVE_REGULATION_OF_TELOMERE_CAPPING		17	0.564854	1.56448	0.0425101	0.118298	0.978	5142	tags=41%, list=9%, signal=45%
GO_INTRINSIC_APOPTOTIC_SIGNALING_PATHWAY_IN_RESPONSE_TO_OXIDATIVE_STRESS	go_intrinsic_apoptotic_signaling_pathway_in_response_to_oxidative_stress	GO_INTRINSIC_APOPTOTIC_SIGNALING_PATHWAY_IN_RESPONSE_TO_OXIDATIVE_STRESS		43	0.469053	1.56422	0.0447761	0.118324	0.979	5886	tags=37%, list=11%, signal=42%
GO_REACTIVE_OXYGEN_SPECIES_BIOSYNTHETIC_PROCESS	go_reactive_oxygen_species_biosynthetic_process	GO_REACTIVE_OXYGEN_SPECIES_BIOSYNTHETIC_PROCESS		121	0.408553	1.56415	0.029106	0.118218	0.979	4253	tags=22%, list=8%, signal=24%
GO_ACIDIC_AMINO_ACID_TRANSPORT	go_acidic_amino_acid_transport	GO_ACIDIC_AMINO_ACID_TRANSPORT		71	0.423346	1.56413	0.0121704	0.118071	0.979	3808	tags=25%, list=7%, signal=27%
GO_OOCYTE_MATURATION	go_oocyte_maturation	GO_OOCYTE_MATURATION		27	0.512497	1.56388	0.0388548	0.118059	0.979	8867	tags=48%, list=16%, signal=57%
GO_POSITIVE_REGULATION_OF_RNA_SPLICING	go_positive_regulation_of_rna_splicing	GO_POSITIVE_REGULATION_OF_RNA_SPLICING		37	0.549274	1.56362	0.0378151	0.118101	0.979	7555	tags=41%, list=14%, signal=47%
GO_EPITHELIAL_TO_MESENCHYMAL_TRANSITION	go_epithelial_to_mesenchymal_transition	GO_EPITHELIAL_TO_MESENCHYMAL_TRANSITION		148	0.435381	1.56311	0.0376569	0.118172	0.979	5617	tags=32%, list=10%, signal=36%
GO_REGULATION_OF_STEM_CELL_POPULATION_MAINTENANCE	go_regulation_of_stem_cell_population_maintenance	GO_REGULATION_OF_STEM_CELL_POPULATION_MAINTENANCE		34	0.53354	1.5614	0.0308642	0.119173	0.979	6306	tags=44%, list=11%, signal=50%
GO_POSITIVE_REGULATION_OF_PROTEIN_TARGETING_TO_MITOCHONDRION	go_positive_regulation_of_protein_targeting_to_mitochondrion	GO_POSITIVE_REGULATION_OF_PROTEIN_TARGETING_TO_MITOCHONDRION		32	0.49404	1.56135	0.038055	0.119047	0.979	5586	tags=38%, list=10%, signal=42%
GO_RESPONSE_TO_TRANSFORMING_GROWTH_FACTOR_BETA	go_response_to_transforming_growth_factor_beta	GO_RESPONSE_TO_TRANSFORMING_GROWTH_FACTOR_BETA		255	0.415731	1.56128	0.0452675	0.118962	0.979	6661	tags=37%, list=12%, signal=42%
GO_NEGATIVE_REGULATION_OF_CELL_AGING	go_negative_regulation_of_cell_aging	GO_NEGATIVE_REGULATION_OF_CELL_AGING		27	0.525488	1.56105	0.04	0.11898	0.979	4637	tags=33%, list=8%, signal=36%
GO_REGULATION_OF_MUSCLE_HYPERTROPHY	go_regulation_of_muscle_hypertrophy	GO_REGULATION_OF_MUSCLE_HYPERTROPHY		66	0.437164	1.56103	0.0385396	0.118832	0.979	7902	tags=36%, list=14%, signal=42%
GO_REGULATION_OF_RESPONSE_TO_DNA_DAMAGE_STIMULUS	go_regulation_of_response_to_dna_damage_stimulus	GO_REGULATION_OF_RESPONSE_TO_DNA_DAMAGE_STIMULUS		222	0.447172	1.56093	0.0388769	0.118757	0.979	6730	tags=39%, list=12%, signal=44%
GO_VESICLE_LOCALIZATION	go_vesicle_localization	GO_VESICLE_LOCALIZATION		227	0.438843	1.56088	0.0455487	0.118628	0.979	5326	tags=34%, list=10%, signal=38%
GO_MODULATION_BY_HOST_OF_VIRAL_PROCESS	go_modulation_by_host_of_viral_process	GO_MODULATION_BY_HOST_OF_VIRAL_PROCESS		30	0.479678	1.55923	0.0299401	0.119451	0.979	5708	tags=40%, list=10%, signal=45%
GO_NEGATIVE_REGULATION_OF_CELLULAR_RESPONSE_TO_GROWTH_FACTOR_STIMULUS	go_negative_regulation_of_cellular_response_to_growth_factor_stimulus	GO_NEGATIVE_REGULATION_OF_CELLULAR_RESPONSE_TO_GROWTH_FACTOR_STIMULUS		175	0.420494	1.55826	0.029106	0.119574	0.979	5931	tags=30%, list=11%, signal=34%
GO_CENTRAL_NERVOUS_SYSTEM_PROJECTION_NEURON_AXONOGENESIS	go_central_nervous_system_projection_neuron_axonogenesis	GO_CENTRAL_NERVOUS_SYSTEM_PROJECTION_NEURON_AXONOGENESIS		26	0.516372	1.55778	0.0351562	0.1196	0.979	4033	tags=31%, list=7%, signal=33%
GO_MALE_SEX_DIFFERENTIATION	go_male_sex_differentiation	GO_MALE_SEX_DIFFERENTIATION		162	0.406906	1.55592	0.0273684	0.120288	0.98	5538	tags=29%, list=10%, signal=32%
GO_POSITIVE_REGULATION_OF_DNA_RECOMBINATION	go_positive_regulation_of_dna_recombination	GO_POSITIVE_REGULATION_OF_DNA_RECOMBINATION		45	0.509021	1.5555	0.0463158	0.120321	0.98	4409	tags=31%, list=8%, signal=34%
GO_ORGANELLE_TRANSPORT_ALONG_MICROTUBULE	go_organelle_transport_along_microtubule	GO_ORGANELLE_TRANSPORT_ALONG_MICROTUBULE		85	0.476197	1.55496	0.0383065	0.120124	0.98	6541	tags=41%, list=12%, signal=47%
GO_NEGATIVE_REGULATION_OF_PEPTIDYL_THREONINE_PHOSPHORYLATION	go_negative_regulation_of_peptidyl_threonine_phosphorylation	GO_NEGATIVE_REGULATION_OF_PEPTIDYL_THREONINE_PHOSPHORYLATION		20	0.550836	1.55493	0.0392157	0.120005	0.98	3338	tags=35%, list=6%, signal=37%
GO_CENTRAL_NERVOUS_SYSTEM_NEURON_DEVELOPMENT	go_central_nervous_system_neuron_development	GO_CENTRAL_NERVOUS_SYSTEM_NEURON_DEVELOPMENT		82	0.443372	1.55465	0.0345528	0.119904	0.98	5914	tags=35%, list=11%, signal=40%
GO_MAMMARY_GLAND_MORPHOGENESIS	go_mammary_gland_morphogenesis	GO_MAMMARY_GLAND_MORPHOGENESIS		45	0.477405	1.55385	0.0449898	0.120122	0.98	5781	tags=38%, list=10%, signal=42%
GO_MOTOR_NEURON_AXON_GUIDANCE	go_motor_neuron_axon_guidance	GO_MOTOR_NEURON_AXON_GUIDANCE		31	0.491332	1.55312	0.026749	0.12035	0.98	5637	tags=35%, list=10%, signal=39%
GO_HISTONE_MRNA_METABOLIC_PROCESS	go_histone_mrna_metabolic_process	GO_HISTONE_MRNA_METABOLIC_PROCESS		25	0.564474	1.55294	0.0387931	0.120331	0.98	5365	tags=52%, list=10%, signal=58%
GO_REGULATION_OF_MAMMARY_GLAND_EPITHELIAL_CELL_PROLIFERATION	go_regulation_of_mammary_gland_epithelial_cell_proliferation	GO_REGULATION_OF_MAMMARY_GLAND_EPITHELIAL_CELL_PROLIFERATION		17	0.560178	1.55286	0.0378486	0.120256	0.98	4975	tags=35%, list=9%, signal=39%
GO_REGULATION_OF_VASCULOGENESIS	go_regulation_of_vasculogenesis	GO_REGULATION_OF_VASCULOGENESIS		16	0.580896	1.55207	0.0354906	0.120597	0.98	3917	tags=50%, list=7%, signal=54%
GO_INOSITOL_PHOSPHATE_METABOLIC_PROCESS	go_inositol_phosphate_metabolic_process	GO_INOSITOL_PHOSPHATE_METABOLIC_PROCESS		71	0.427484	1.55142	0.0254403	0.12099	0.98	6829	tags=38%, list=12%, signal=43%
GO_POSITIVE_REGULATION_OF_GLYCOPROTEIN_METABOLIC_PROCESS	go_positive_regulation_of_glycoprotein_metabolic_process	GO_POSITIVE_REGULATION_OF_GLYCOPROTEIN_METABOLIC_PROCESS		26	0.532764	1.55104	0.0232068	0.121121	0.98	5201	tags=46%, list=9%, signal=51%
GO_NEGATIVE_REGULATION_OF_RESPONSE_TO_DNA_DAMAGE_STIMULUS	go_negative_regulation_of_response_to_dna_damage_stimulus	GO_NEGATIVE_REGULATION_OF_RESPONSE_TO_DNA_DAMAGE_STIMULUS		81	0.450754	1.54931	0.0377359	0.122375	0.98	6626	tags=42%, list=12%, signal=48%
GO_POSITIVE_REGULATION_OF_PROTEIN_BINDING	go_positive_regulation_of_protein_binding	GO_POSITIVE_REGULATION_OF_PROTEIN_BINDING		84	0.438331	1.5488	0.0313152	0.12263	0.98	5475	tags=39%, list=10%, signal=44%
GO_CELLULAR_RESPONSE_TO_DRUG	go_cellular_response_to_drug	GO_CELLULAR_RESPONSE_TO_DRUG		70	0.44366	1.54826	0.0275424	0.122925	0.98	3471	tags=29%, list=6%, signal=30%
GO_REGULATION_OF_ARP2_3_COMPLEX_MEDIATED_ACTIN_NUCLEATION	go_regulation_of_arp2_3_complex_mediated_actin_nucleation	GO_REGULATION_OF_ARP2_3_COMPLEX_MEDIATED_ACTIN_NUCLEATION		20	0.542623	1.54728	0.0491803	0.123394	0.98	4383	tags=50%, list=8%, signal=54%
GO_REGULATION_OF_EPITHELIAL_TO_MESENCHYMAL_TRANSITION	go_regulation_of_epithelial_to_mesenchymal_transition	GO_REGULATION_OF_EPITHELIAL_TO_MESENCHYMAL_TRANSITION		95	0.453091	1.54658	0.0440252	0.123476	0.98	5617	tags=34%, list=10%, signal=37%
GO_NEGATIVE_REGULATION_OF_PROTEIN_CATABOLIC_PROCESS	go_negative_regulation_of_protein_catabolic_process	GO_NEGATIVE_REGULATION_OF_PROTEIN_CATABOLIC_PROCESS		130	0.412808	1.54646	0.0468432	0.123382	0.98	6695	tags=35%, list=12%, signal=40%
GO_POSITIVE_REGULATION_OF_AUTOPHAGY_OF_MITOCHONDRION	go_positive_regulation_of_autophagy_of_mitochondrion	GO_POSITIVE_REGULATION_OF_AUTOPHAGY_OF_MITOCHONDRION		21	0.549442	1.5461	0.0474227	0.123511	0.98	3310	tags=43%, list=6%, signal=46%
GO_NEGATIVE_REGULATION_OF_TRANSMEMBRANE_RECEPTOR_PROTEIN_SERINE_THREONINE_KINASE_SIGNALING_PATHWAY	go_negative_regulation_of_transmembrane_receptor_protein_serine_threonine_kinase_signaling_pathway	GO_NEGATIVE_REGULATION_OF_TRANSMEMBRANE_RECEPTOR_PROTEIN_SERINE_THREONINE_KINASE_SIGNALING_PATHWAY		129	0.424703	1.54522	0.037037	0.123746	0.98	6661	tags=36%, list=12%, signal=40%
GO_RESPONSE_TO_RADIATION	go_response_to_radiation	GO_RESPONSE_TO_RADIATION		440	0.38873	1.54358	0.0407725	0.124317	0.981	5487	tags=30%, list=10%, signal=33%
GO_ESTABLISHMENT_OF_EPITHELIAL_CELL_APICAL_BASAL_POLARITY	go_establishment_of_epithelial_cell_apical_basal_polarity	GO_ESTABLISHMENT_OF_EPITHELIAL_CELL_APICAL_BASAL_POLARITY		15	0.544861	1.54334	0.0393701	0.124372	0.981	4750	tags=53%, list=9%, signal=58%
GO_POSITIVE_REGULATION_OF_TUMOR_NECROSIS_FACTOR_SECRETION	go_positive_regulation_of_tumor_necrosis_factor_secretion	GO_POSITIVE_REGULATION_OF_TUMOR_NECROSIS_FACTOR_SECRETION		26	0.560773	1.5419	0.0497925	0.124812	0.981	3643	tags=27%, list=7%, signal=29%
GO_CYTOSKELETON_DEPENDENT_INTRACELLULAR_TRANSPORT	go_cytoskeleton_dependent_intracellular_transport	GO_CYTOSKELETON_DEPENDENT_INTRACELLULAR_TRANSPORT		199	0.429975	1.5418	0.0391753	0.124723	0.981	5663	tags=35%, list=10%, signal=39%
GO_INSULIN_LIKE_GROWTH_FACTOR_RECEPTOR_SIGNALING_PATHWAY	go_insulin_like_growth_factor_receptor_signaling_pathway	GO_INSULIN_LIKE_GROWTH_FACTOR_RECEPTOR_SIGNALING_PATHWAY		36	0.467998	1.54143	0.0324544	0.124894	0.981	3299	tags=25%, list=6%, signal=27%
GO_HETEROPHILIC_CELL_CELL_ADHESION_VIA_PLASMA_MEMBRANE_CELL_ADHESION_MOLECULES	go_heterophilic_cell_cell_adhesion_via_plasma_membrane_cell_adhesion_molecules	GO_HETEROPHILIC_CELL_CELL_ADHESION_VIA_PLASMA_MEMBRANE_CELL_ADHESION_MOLECULES		47	0.456163	1.54047	0.0471311	0.125514	0.981	3807	tags=19%, list=7%, signal=21%
GO_NEGATIVE_REGULATION_OF_PROTEIN_MODIFICATION_BY_SMALL_PROTEIN_CONJUGATION_OR_REMOVAL	go_negative_regulation_of_protein_modification_by_small_protein_conjugation_or_removal	GO_NEGATIVE_REGULATION_OF_PROTEIN_MODIFICATION_BY_SMALL_PROTEIN_CONJUGATION_OR_REMOVAL		90	0.415017	1.54002	0.0298805	0.125255	0.981	5835	tags=33%, list=11%, signal=37%
GO_POSITIVE_REGULATION_OF_VASCULAR_ENDOTHELIAL_GROWTH_FACTOR_PRODUCTION	go_positive_regulation_of_vascular_endothelial_growth_factor_production	GO_POSITIVE_REGULATION_OF_VASCULAR_ENDOTHELIAL_GROWTH_FACTOR_PRODUCTION		28	0.526987	1.53894	0.0443038	0.125588	0.981	4065	tags=32%, list=7%, signal=35%
GO_NEGATIVE_REGULATION_OF_CELLULAR_PROTEIN_CATABOLIC_PROCESS	go_negative_regulation_of_cellular_protein_catabolic_process	GO_NEGATIVE_REGULATION_OF_CELLULAR_PROTEIN_CATABOLIC_PROCESS		84	0.441965	1.53883	0.0452675	0.125514	0.981	4930	tags=32%, list=9%, signal=35%
GO_PALLIUM_DEVELOPMENT	go_pallium_development	GO_PALLIUM_DEVELOPMENT		168	0.41674	1.5386	0.0392562	0.125512	0.981	5942	tags=33%, list=11%, signal=37%
GO_REGULATION_OF_PEPTIDYL_SERINE_PHOSPHORYLATION	go_regulation_of_peptidyl_serine_phosphorylation	GO_REGULATION_OF_PEPTIDYL_SERINE_PHOSPHORYLATION		145	0.392629	1.53857	0.026087	0.125393	0.981	7710	tags=37%, list=14%, signal=42%
GO_PHOSPHOLIPID_METABOLIC_PROCESS	go_phospholipid_metabolic_process	GO_PHOSPHOLIPID_METABOLIC_PROCESS		447	0.372893	1.53839	0.0230608	0.125394	0.981	6219	tags=29%, list=11%, signal=33%
GO_INTRACELLULAR_ESTROGEN_RECEPTOR_SIGNALING_PATHWAY	go_intracellular_estrogen_receptor_signaling_pathway	GO_INTRACELLULAR_ESTROGEN_RECEPTOR_SIGNALING_PATHWAY		57	0.478021	1.53792	0.0381356	0.125465	0.981	5701	tags=37%, list=10%, signal=41%
GO_PHOSPHATIDYLINOSITOL_METABOLIC_PROCESS	go_phosphatidylinositol_metabolic_process	GO_PHOSPHATIDYLINOSITOL_METABOLIC_PROCESS		181	0.419863	1.5359	0.045929	0.12673	0.982	6219	tags=32%, list=11%, signal=36%
GO_RESPONSE_TO_STEROID_HORMONE	go_response_to_steroid_hormone	GO_RESPONSE_TO_STEROID_HORMONE		345	0.370038	1.53452	0.0274262	0.127532	0.983	6662	tags=31%, list=12%, signal=35%
GO_REGULATION_OF_GLIOGENESIS	go_regulation_of_gliogenesis	GO_REGULATION_OF_GLIOGENESIS		125	0.403905	1.53405	0.0293501	0.12764	0.983	6018	tags=30%, list=11%, signal=33%
GO_NEGATIVE_REGULATION_OF_DNA_BINDING	go_negative_regulation_of_dna_binding	GO_NEGATIVE_REGULATION_OF_DNA_BINDING		52	0.449881	1.53382	0.0354906	0.127658	0.983	5617	tags=35%, list=10%, signal=38%
GO_CELLULAR_RESPONSE_TO_VIRUS	go_cellular_response_to_virus	GO_CELLULAR_RESPONSE_TO_VIRUS		60	0.457071	1.53319	0.0412371	0.127982	0.983	3643	tags=28%, list=7%, signal=30%
GO_REGULATION_OF_PLASMA_MEMBRANE_ORGANIZATION	go_regulation_of_plasma_membrane_organization	GO_REGULATION_OF_PLASMA_MEMBRANE_ORGANIZATION		16	0.531586	1.53288	0.0496894	0.128079	0.983	6587	tags=50%, list=12%, signal=57%
GO_CELL_SUBSTRATE_ADHESION	go_cell_substrate_adhesion	GO_CELL_SUBSTRATE_ADHESION		352	0.409152	1.53267	0.0448065	0.127924	0.983	4757	tags=26%, list=9%, signal=28%
GO_SERTOLI_CELL_DIFFERENTIATION	go_sertoli_cell_differentiation	GO_SERTOLI_CELL_DIFFERENTIATION		21	0.499628	1.53256	0.026749	0.127861	0.983	4081	tags=33%, list=7%, signal=36%
GO_LABYRINTHINE_LAYER_DEVELOPMENT	go_labyrinthine_layer_development	GO_LABYRINTHINE_LAYER_DEVELOPMENT		48	0.446032	1.53152	0.0210526	0.128394	0.983	5020	tags=33%, list=9%, signal=37%
GO_REGULATION_OF_VIRAL_LIFE_CYCLE	go_regulation_of_viral_life_cycle	GO_REGULATION_OF_VIRAL_LIFE_CYCLE		154	0.432628	1.53141	0.0423729	0.128308	0.983	6252	tags=34%, list=11%, signal=38%
GO_EPITHELIAL_TUBE_MORPHOGENESIS	go_epithelial_tube_morphogenesis	GO_EPITHELIAL_TUBE_MORPHOGENESIS		330	0.404617	1.52889	0.0442105	0.129548	0.984	6134	tags=32%, list=11%, signal=36%
GO_ACTIVATION_OF_MAPK_ACTIVITY	go_activation_of_mapk_activity	GO_ACTIVATION_OF_MAPK_ACTIVITY		155	0.407624	1.52868	0.0293501	0.129534	0.984	5366	tags=30%, list=10%, signal=33%
GO_HOMOTYPIC_CELL_CELL_ADHESION	go_homotypic_cell_cell_adhesion	GO_HOMOTYPIC_CELL_CELL_ADHESION		86	0.433748	1.52831	0.0462185	0.129717	0.984	8167	tags=38%, list=15%, signal=45%
GO_POSITIVE_REGULATION_OF_ESTABLISHMENT_OF_PROTEIN_LOCALIZATION_TO_MITOCHONDRION	go_positive_regulation_of_establishment_of_protein_localization_to_mitochondrion	GO_POSITIVE_REGULATION_OF_ESTABLISHMENT_OF_PROTEIN_LOCALIZATION_TO_MITOCHONDRION		58	0.444592	1.52826	0.0470085	0.129596	0.984	5586	tags=33%, list=10%, signal=36%
GO_REGULATION_OF_PROTEIN_MODIFICATION_BY_SMALL_PROTEIN_CONJUGATION_OR_REMOVAL	go_regulation_of_protein_modification_by_small_protein_conjugation_or_removal	GO_REGULATION_OF_PROTEIN_MODIFICATION_BY_SMALL_PROTEIN_CONJUGATION_OR_REMOVAL		238	0.414628	1.52818	0.0465116	0.129525	0.985	5137	tags=32%, list=9%, signal=35%
GO_PROTEIN_CATABOLIC_PROCESS_IN_THE_VACUOLE	go_protein_catabolic_process_in_the_vacuole	GO_PROTEIN_CATABOLIC_PROCESS_IN_THE_VACUOLE		19	0.542228	1.5261	0.0398406	0.13089	0.985	5480	tags=53%, list=10%, signal=58%
GO_POSITIVE_REGULATION_OF_STRIATED_MUSCLE_CELL_APOPTOTIC_PROCESS	go_positive_regulation_of_striated_muscle_cell_apoptotic_process	GO_POSITIVE_REGULATION_OF_STRIATED_MUSCLE_CELL_APOPTOTIC_PROCESS		16	0.522544	1.52535	0.0483193	0.130904	0.986	1956	tags=19%, list=4%, signal=19%
GO_REGULATION_OF_BINDING	go_regulation_of_binding	GO_REGULATION_OF_BINDING		360	0.377203	1.52335	0.0277778	0.132154	0.986	5701	tags=30%, list=10%, signal=34%
GO_REGULATION_OF_ANDROGEN_RECEPTOR_SIGNALING_PATHWAY	go_regulation_of_androgen_receptor_signaling_pathway	GO_REGULATION_OF_ANDROGEN_RECEPTOR_SIGNALING_PATHWAY		26	0.508479	1.52329	0.0425101	0.132078	0.986	6548	tags=38%, list=12%, signal=44%
GO_REGULATION_OF_PROTEASOMAL_PROTEIN_CATABOLIC_PROCESS	go_regulation_of_proteasomal_protein_catabolic_process	GO_REGULATION_OF_PROTEASOMAL_PROTEIN_CATABOLIC_PROCESS		189	0.414646	1.52288	0.0341151	0.131936	0.986	5480	tags=30%, list=10%, signal=33%
GO_REGULATION_OF_VACUOLE_ORGANIZATION	go_regulation_of_vacuole_organization	GO_REGULATION_OF_VACUOLE_ORGANIZATION		46	0.47391	1.5222	0.0377359	0.13218	0.986	5001	tags=41%, list=9%, signal=45%
GO_MESENCHYMAL_CELL_DIFFERENTIATION	go_mesenchymal_cell_differentiation	GO_MESENCHYMAL_CELL_DIFFERENTIATION		225	0.406343	1.52038	0.0407332	0.133089	0.986	5617	tags=31%, list=10%, signal=34%
GO_NEGATIVE_REGULATION_OF_ANDROGEN_RECEPTOR_SIGNALING_PATHWAY	go_negative_regulation_of_androgen_receptor_signaling_pathway	GO_NEGATIVE_REGULATION_OF_ANDROGEN_RECEPTOR_SIGNALING_PATHWAY		15	0.574694	1.51941	0.0488281	0.133427	0.987	6548	tags=40%, list=12%, signal=45%
GO_NEGATIVE_REGULATION_OF_DENDRITE_MORPHOGENESIS	go_negative_regulation_of_dendrite_morphogenesis	GO_NEGATIVE_REGULATION_OF_DENDRITE_MORPHOGENESIS		16	0.551192	1.51796	0.0498008	0.134013	0.988	2972	tags=38%, list=5%, signal=40%
GO_POSITIVE_REGULATION_OF_UBIQUITIN_DEPENDENT_PROTEIN_CATABOLIC_PROCESS	go_positive_regulation_of_ubiquitin_dependent_protein_catabolic_process	GO_POSITIVE_REGULATION_OF_UBIQUITIN_DEPENDENT_PROTEIN_CATABOLIC_PROCESS		102	0.417072	1.51702	0.0477178	0.134649	0.988	5480	tags=30%, list=10%, signal=34%
GO_POSITIVE_REGULATION_OF_SYNAPTIC_TRANSMISSION	go_positive_regulation_of_synaptic_transmission	GO_POSITIVE_REGULATION_OF_SYNAPTIC_TRANSMISSION		172	0.393723	1.51625	0.0269151	0.134631	0.988	4312	tags=23%, list=8%, signal=25%
GO_NEGATIVE_REGULATION_OF_CYCLIN_DEPENDENT_PROTEIN_KINASE_ACTIVITY	go_negative_regulation_of_cyclin_dependent_protein_kinase_activity	GO_NEGATIVE_REGULATION_OF_CYCLIN_DEPENDENT_PROTEIN_KINASE_ACTIVITY		32	0.471441	1.5112	0.0372671	0.137879	0.988	8743	tags=41%, list=16%, signal=48%
GO_TISSUE_MIGRATION	go_tissue_migration	GO_TISSUE_MIGRATION		350	0.379983	1.51108	0.048	0.137822	0.988	6178	tags=27%, list=11%, signal=30%
GO_POSITIVE_REGULATION_OF_CELL_CYCLE_G2_M_PHASE_TRANSITION	go_positive_regulation_of_cell_cycle_g2_m_phase_transition	GO_POSITIVE_REGULATION_OF_CELL_CYCLE_G2_M_PHASE_TRANSITION		30	0.519768	1.50682	0.0388548	0.140065	0.988	5755	tags=43%, list=10%, signal=48%
GO_CELLULAR_RESPONSE_TO_LOW_DENSITY_LIPOPROTEIN_PARTICLE_STIMULUS	go_cellular_response_to_low_density_lipoprotein_particle_stimulus	GO_CELLULAR_RESPONSE_TO_LOW_DENSITY_LIPOPROTEIN_PARTICLE_STIMULUS		21	0.518987	1.50673	0.0460922	0.139979	0.988	2543	tags=29%, list=5%, signal=30%
GO_REGULATION_OF_RESPONSE_TO_OXIDATIVE_STRESS	go_regulation_of_response_to_oxidative_stress	GO_REGULATION_OF_RESPONSE_TO_OXIDATIVE_STRESS		87	0.415971	1.50534	0.0267857	0.140705	0.988	4787	tags=30%, list=9%, signal=33%
GO_PERIPHERAL_NERVOUS_SYSTEM_DEVELOPMENT	go_peripheral_nervous_system_development	GO_PERIPHERAL_NERVOUS_SYSTEM_DEVELOPMENT		77	0.408868	1.50525	0.021611	0.140644	0.988	5637	tags=31%, list=10%, signal=35%
GO_CLATHRIN_COAT_ASSEMBLY	go_clathrin_coat_assembly	GO_CLATHRIN_COAT_ASSEMBLY		18	0.520965	1.50181	0.0424242	0.141421	0.988	7600	tags=56%, list=14%, signal=64%
GO_STEM_CELL_PROLIFERATION	go_stem_cell_proliferation	GO_STEM_CELL_PROLIFERATION		123	0.406135	1.50161	0.0482897	0.141427	0.988	5026	tags=28%, list=9%, signal=30%
GO_RESPONSE_TO_IMMOBILIZATION_STRESS	go_response_to_immobilization_stress	GO_RESPONSE_TO_IMMOBILIZATION_STRESS		26	0.49411	1.49979	0.0229167	0.142332	0.988	4507	tags=35%, list=8%, signal=38%
GO_PHOSPHATIDYLCHOLINE_BIOSYNTHETIC_PROCESS	go_phosphatidylcholine_biosynthetic_process	GO_PHOSPHATIDYLCHOLINE_BIOSYNTHETIC_PROCESS		39	0.426931	1.49908	0.0257937	0.142325	0.989	6404	tags=31%, list=12%, signal=35%
GO_DEPHOSPHORYLATION	go_dephosphorylation	GO_DEPHOSPHORYLATION		490	0.38247	1.49642	0.0472103	0.143812	0.989	6462	tags=32%, list=12%, signal=36%
GO_PHOSPHATIDYLINOSITOL_3_KINASE_SIGNALING	go_phosphatidylinositol_3_kinase_signaling	GO_PHOSPHATIDYLINOSITOL_3_KINASE_SIGNALING		151	0.412063	1.49591	0.0491453	0.143924	0.989	3482	tags=22%, list=6%, signal=23%
GO_CHROMOSOME_ORGANIZATION_INVOLVED_IN_MEIOTIC_CELL_CYCLE	go_chromosome_organization_involved_in_meiotic_cell_cycle	GO_CHROMOSOME_ORGANIZATION_INVOLVED_IN_MEIOTIC_CELL_CYCLE		68	0.441998	1.49577	0.0455487	0.143871	0.989	6888	tags=38%, list=12%, signal=44%
GO_AMEBOIDAL_TYPE_CELL_MIGRATION	go_ameboidal_type_cell_migration	GO_AMEBOIDAL_TYPE_CELL_MIGRATION		456	0.377259	1.49502	0.0489796	0.144336	0.989	6178	tags=27%, list=11%, signal=30%
GO_NITRIC_OXIDE_MEDIATED_SIGNAL_TRANSDUCTION	go_nitric_oxide_mediated_signal_transduction	GO_NITRIC_OXIDE_MEDIATED_SIGNAL_TRANSDUCTION		29	0.49867	1.4949	0.0394477	0.144304	0.989	3656	tags=24%, list=7%, signal=26%
GO_NEGATIVE_REGULATION_OF_APOPTOTIC_SIGNALING_PATHWAY	go_negative_regulation_of_apoptotic_signaling_pathway	GO_NEGATIVE_REGULATION_OF_APOPTOTIC_SIGNALING_PATHWAY		228	0.375248	1.49348	0.0352697	0.145091	0.99	5755	tags=28%, list=10%, signal=31%
GO_REGULATION_OF_PROTEIN_BINDING	go_regulation_of_protein_binding	GO_REGULATION_OF_PROTEIN_BINDING		208	0.378397	1.49343	0.0458333	0.144973	0.99	6073	tags=32%, list=11%, signal=36%
GO_POSITIVE_REGULATION_OF_EPITHELIAL_CELL_PROLIFERATION	go_positive_regulation_of_epithelial_cell_proliferation	GO_POSITIVE_REGULATION_OF_EPITHELIAL_CELL_PROLIFERATION		206	0.392058	1.49131	0.0399202	0.145651	0.992	4036	tags=23%, list=7%, signal=25%
GO_POSITIVE_REGULATION_OF_EMBRYONIC_DEVELOPMENT	go_positive_regulation_of_embryonic_development	GO_POSITIVE_REGULATION_OF_EMBRYONIC_DEVELOPMENT		40	0.464262	1.49086	0.0494845	0.145857	0.992	2333	tags=23%, list=4%, signal=23%
GO_POSITIVE_REGULATION_OF_INSULIN_SECRETION_INVOLVED_IN_CELLULAR_RESPONSE_TO_GLUCOSE_STIMULUS	go_positive_regulation_of_insulin_secretion_involved_in_cellular_response_to_glucose_stimulus	GO_POSITIVE_REGULATION_OF_INSULIN_SECRETION_INVOLVED_IN_CELLULAR_RESPONSE_TO_GLUCOSE_STIMULUS		34	0.450354	1.49065	0.036961	0.145873	0.992	4181	tags=26%, list=8%, signal=29%
GO_RESPONSE_TO_AXON_INJURY	go_response_to_axon_injury	GO_RESPONSE_TO_AXON_INJURY		79	0.396366	1.4762	0.0452675	0.152426	0.995	5192	tags=29%, list=9%, signal=32%
GO_PIGMENTATION	go_pigmentation	GO_PIGMENTATION		99	0.403151	1.47619	0.0475207	0.152278	0.995	5234	tags=28%, list=9%, signal=31%
GO_REGULATION_OF_MITOCHONDRION_ORGANIZATION	go_regulation_of_mitochondrion_organization	GO_REGULATION_OF_MITOCHONDRION_ORGANIZATION		189	0.374132	1.47571	0.0486258	0.152531	0.995	3681	tags=26%, list=7%, signal=28%
GO_HORMONE_MEDIATED_SIGNALING_PATHWAY	go_hormone_mediated_signaling_pathway	GO_HORMONE_MEDIATED_SIGNALING_PATHWAY		200	0.393755	1.47333	0.0435685	0.153361	0.995	6596	tags=34%, list=12%, signal=38%
GO_SKIN_DEVELOPMENT	go_skin_development	GO_SKIN_DEVELOPMENT		420	0.367412	1.47116	0.0318091	0.153631	0.996	5700	tags=22%, list=10%, signal=25%
GO_MUSCLE_CELL_CELLULAR_HOMEOSTASIS	go_muscle_cell_cellular_homeostasis	GO_MUSCLE_CELL_CELLULAR_HOMEOSTASIS		21	0.482209	1.47114	0.0444444	0.153499	0.996	3881	tags=38%, list=7%, signal=41%
GO_RESPONSE_TO_PEPTIDE_HORMONE	go_response_to_peptide_hormone	GO_RESPONSE_TO_PEPTIDE_HORMONE		442	0.35843	1.47103	0.0398323	0.153446	0.996	6736	tags=31%, list=12%, signal=35%
GO_EPITHELIAL_CELL_PROLIFERATION	go_epithelial_cell_proliferation	GO_EPITHELIAL_CELL_PROLIFERATION		435	0.361109	1.46511	0.0417537	0.156221	0.996	5956	tags=26%, list=11%, signal=29%
GO_VASCULAR_ENDOTHELIAL_CELL_PROLIFERATION	go_vascular_endothelial_cell_proliferation	GO_VASCULAR_ENDOTHELIAL_CELL_PROLIFERATION		41	0.440909	1.46484	0.0353635	0.156158	0.996	3203	tags=20%, list=6%, signal=21%
GO_POSITIVE_REGULATION_OF_CELL_GROWTH	go_positive_regulation_of_cell_growth	GO_POSITIVE_REGULATION_OF_CELL_GROWTH		163	0.38657	1.464	0.0474227	0.156149	0.996	5685	tags=31%, list=10%, signal=34%
GO_MAMMARY_GLAND_DEVELOPMENT	go_mammary_gland_development	GO_MAMMARY_GLAND_DEVELOPMENT		142	0.379311	1.46393	0.0445344	0.156071	0.996	6548	tags=32%, list=12%, signal=37%
GO_REGULATION_OF_RESPIRATORY_GASEOUS_EXCHANGE	go_regulation_of_respiratory_gaseous_exchange	GO_REGULATION_OF_RESPIRATORY_GASEOUS_EXCHANGE		23	0.467619	1.45933	0.0386847	0.157383	0.996	5936	tags=30%, list=11%, signal=34%
GO_GLYCEROLIPID_BIOSYNTHETIC_PROCESS	go_glycerolipid_biosynthetic_process	GO_GLYCEROLIPID_BIOSYNTHETIC_PROCESS		267	0.361953	1.45743	0.0398323	0.158019	0.996	5482	tags=26%, list=10%, signal=29%
GO_WATER_HOMEOSTASIS	go_water_homeostasis	GO_WATER_HOMEOSTASIS		79	0.373877	1.45657	0.0246914	0.158669	0.996	6896	tags=34%, list=12%, signal=39%
GO_REGULATION_OF_HEART_RATE_BY_CARDIAC_CONDUCTION	go_regulation_of_heart_rate_by_cardiac_conduction	GO_REGULATION_OF_HEART_RATE_BY_CARDIAC_CONDUCTION		39	0.420174	1.4563	0.048583	0.158777	0.996	3745	tags=28%, list=7%, signal=30%
GO_REGULATION_OF_BODY_FLUID_LEVELS	go_regulation_of_body_fluid_levels	GO_REGULATION_OF_BODY_FLUID_LEVELS		498	0.354552	1.45246	0.0458333	0.160588	0.996	6302	tags=27%, list=11%, signal=30%
GO_NEGATIVE_REGULATION_OF_AMYLOID_PRECURSOR_PROTEIN_CATABOLIC_PROCESS	go_negative_regulation_of_amyloid_precursor_protein_catabolic_process	GO_NEGATIVE_REGULATION_OF_AMYLOID_PRECURSOR_PROTEIN_CATABOLIC_PROCESS		17	0.502758	1.45152	0.0452756	0.160946	0.996	3474	tags=41%, list=6%, signal=44%
GO_DOPAMINERGIC_NEURON_DIFFERENTIATION	go_dopaminergic_neuron_differentiation	GO_DOPAMINERGIC_NEURON_DIFFERENTIATION		37	0.439486	1.44535	0.0433884	0.162345	0.996	4823	tags=32%, list=9%, signal=36%
GO_GLYCEROLIPID_METABOLIC_PROCESS	go_glycerolipid_metabolic_process	GO_GLYCEROLIPID_METABOLIC_PROCESS		424	0.344953	1.44419	0.0443038	0.162957	0.996	5482	tags=26%, list=10%, signal=28%
GO_REGULATION_OF_MONOOXYGENASE_ACTIVITY	go_regulation_of_monooxygenase_activity	GO_REGULATION_OF_MONOOXYGENASE_ACTIVITY		65	0.399541	1.43905	0.0485232	0.164906	0.996	3662	tags=25%, list=7%, signal=26%
GO_REGULATION_OF_SYNAPTIC_PLASTICITY	go_regulation_of_synaptic_plasticity	GO_REGULATION_OF_SYNAPTIC_PLASTICITY		191	0.361268	1.43283	0.0486815	0.166758	0.996	4169	tags=23%, list=8%, signal=25%
GO_ADULT_LOCOMOTORY_BEHAVIOR	go_adult_locomotory_behavior	GO_ADULT_LOCOMOTORY_BEHAVIOR		75	0.392145	1.42628	0.0382294	0.169689	0.996	5981	tags=27%, list=11%, signal=30%
GO_NEGATIVE_REGULATION_OF_HYDROLASE_ACTIVITY	go_negative_regulation_of_hydrolase_activity	GO_NEGATIVE_REGULATION_OF_HYDROLASE_ACTIVITY		458	0.33256	1.42316	0.0442105	0.170494	0.996	5078	tags=23%, list=9%, signal=25%

## Sheet: MF
NAME	GS<br> follow link to MSigDB	GS DETAILS	SIZE	ES	NES	NOM p-val	FDR q-val	FWER p-val	RANK AT MAX	LEADING EDGE
GO_CADHERIN_BINDING	GO_CADHERIN_BINDING	Details ...	316	0.579684	2.01889	0	0.0623844	0.048	6641	tags=48%, list=12%, signal=54%
GO_SINGLE_STRANDED_RNA_BINDING	GO_SINGLE_STRANDED_RNA_BINDING	Details ...	87	0.604124	1.99929	0	0.041725	0.06	4374	tags=45%, list=8%, signal=49%
GO_RAC_GTPASE_BINDING	GO_RAC_GTPASE_BINDING	Details ...	69	0.622125	1.98907	0.0020284	0.0342594	0.068	6020	tags=52%, list=11%, signal=58%
GO_SINGLE_STRANDED_DNA_BINDING	GO_SINGLE_STRANDED_DNA_BINDING	Details ...	111	0.576468	1.88161	0.0040404	0.135043	0.244	6641	tags=48%, list=12%, signal=54%
GO_PHOSPHATIDYLINOSITOL_BINDING	GO_PHOSPHATIDYLINOSITOL_BINDING	Details ...	258	0.524837	1.87643	0	0.114402	0.252	5753	tags=40%, list=10%, signal=45%
GO_RHO_GTPASE_BINDING	GO_RHO_GTPASE_BINDING	Details ...	158	0.550675	1.86031	0.00203252	0.118272	0.286	5776	tags=44%, list=10%, signal=49%
GO_POLYUBIQUITIN_MODIFICATION_DEPENDENT_PROTEIN_BINDING	GO_POLYUBIQUITIN_MODIFICATION_DEPENDENT_PROTEIN_BINDING	Details ...	51	0.564037	1.8378	0	0.132269	0.335	4177	tags=41%, list=8%, signal=45%
GO_PHOSPHATIDYLINOSITOL_PHOSPHATE_PHOSPHATASE_ACTIVITY	GO_PHOSPHATIDYLINOSITOL_PHOSPHATE_PHOSPHATASE_ACTIVITY	Details ...	33	0.654403	1.83518	0.00411523	0.119203	0.341	6829	tags=58%, list=12%, signal=66%
GO_DNA_POLYMERASE_BINDING	GO_DNA_POLYMERASE_BINDING	Details ...	20	0.678389	1.83444	0.00198807	0.107261	0.345	5142	tags=55%, list=9%, signal=61%
GO_PROTEIN_ADP_RIBOSYLASE_ACTIVITY	GO_PROTEIN_ADP_RIBOSYLASE_ACTIVITY	Details ...	16	0.750069	1.83318	0.00206186	0.0982922	0.349	2404	tags=44%, list=4%, signal=46%
GO_TRANSMEMBRANE_RECEPTOR_PROTEIN_PHOSPHATASE_ACTIVITY	GO_TRANSMEMBRANE_RECEPTOR_PROTEIN_PHOSPHATASE_ACTIVITY	Details ...	17	0.720542	1.83303	0	0.0894739	0.349	1918	tags=41%, list=3%, signal=43%
GO_PHOSPHATIDYLINOSITOL_4_PHOSPHATE_BINDING	GO_PHOSPHATIDYLINOSITOL_4_PHOSPHATE_BINDING	Details ...	29	0.626576	1.83026	0.00609756	0.0849218	0.357	6980	tags=62%, list=13%, signal=71%
GO_CHROMATIN_DNA_BINDING	GO_CHROMATIN_DNA_BINDING	Details ...	89	0.564066	1.82611	0.00980392	0.0818566	0.367	6458	tags=47%, list=12%, signal=53%
GO_DAMAGED_DNA_BINDING	GO_DAMAGED_DNA_BINDING	Details ...	65	0.599149	1.82214	0.00205339	0.078994	0.374	5317	tags=48%, list=10%, signal=53%
GO_PEPTIDE_LYSINE_N_ACETYLTRANSFERASE_ACTIVITY	GO_PEPTIDE_LYSINE_N_ACETYLTRANSFERASE_ACTIVITY	Details ...	57	0.660219	1.81573	0.00610998	0.0813646	0.4	8007	tags=56%, list=14%, signal=66%
GO_PHOSPHATIDYLINOSITOL_3_KINASE_BINDING	GO_PHOSPHATIDYLINOSITOL_3_KINASE_BINDING	Details ...	30	0.618841	1.81459	0.00198413	0.076964	0.402	3482	tags=40%, list=6%, signal=43%
GO_PHOSPHATIDYLINOSITOL_PHOSPHATE_BINDING	GO_PHOSPHATIDYLINOSITOL_PHOSPHATE_BINDING	Details ...	177	0.493404	1.80807	0.0041841	0.0782254	0.417	5753	tags=38%, list=10%, signal=43%
GO_SMALL_GTPASE_BINDING	GO_SMALL_GTPASE_BINDING	Details ...	420	0.491314	1.80701	0.00785855	0.0748356	0.418	6694	tags=42%, list=12%, signal=48%
GO_MODIFICATION_DEPENDENT_PROTEIN_BINDING	GO_MODIFICATION_DEPENDENT_PROTEIN_BINDING	Details ...	153	0.560751	1.80561	0.00205339	0.0721205	0.421	6058	tags=43%, list=11%, signal=48%
GO_DOPAMINE_RECEPTOR_BINDING	GO_DOPAMINE_RECEPTOR_BINDING	Details ...	17	0.647773	1.80395	0.00598802	0.0699796	0.426	5304	tags=47%, list=10%, signal=52%
GO_HISTONE_BINDING	GO_HISTONE_BINDING	Details ...	234	0.577065	1.80167	0.0100604	0.0678914	0.43	5344	tags=42%, list=10%, signal=47%
GO_PHOSPHATIDYLINOSITOL_3_PHOSPHATE_BINDING	GO_PHOSPHATIDYLINOSITOL_3_PHOSPHATE_BINDING	Details ...	48	0.552334	1.79299	0.00613497	0.0714639	0.464	5657	tags=40%, list=10%, signal=44%
GO_MRNA_3_UTR_BINDING	GO_MRNA_3_UTR_BINDING	Details ...	108	0.522845	1.79268	0.00601202	0.068577	0.466	7094	tags=41%, list=13%, signal=47%
GO_POLY_PYRIMIDINE_TRACT_BINDING	GO_POLY_PYRIMIDINE_TRACT_BINDING	Details ...	29	0.652382	1.79209	0.0059761	0.065957	0.466	4311	tags=48%, list=8%, signal=52%
GO_PROTEIN_TYROSINE_KINASE_ACTIVITY	GO_PROTEIN_TYROSINE_KINASE_ACTIVITY	Details ...	135	0.50519	1.79139	0.00396825	0.0636342	0.466	6502	tags=41%, list=12%, signal=47%
GO_PEPTIDE_N_ACETYLTRANSFERASE_ACTIVITY	GO_PEPTIDE_N_ACETYLTRANSFERASE_ACTIVITY	Details ...	65	0.62968	1.78449	0.00408163	0.0660871	0.481	8007	tags=55%, list=14%, signal=65%
GO_CERAMIDE_BINDING	GO_CERAMIDE_BINDING	Details ...	15	0.673985	1.78263	0.00196078	0.0651162	0.491	4729	tags=47%, list=9%, signal=51%
GO_PROTEOGLYCAN_BINDING	GO_PROTEOGLYCAN_BINDING	Details ...	36	0.649876	1.78211	0.00598802	0.0631154	0.491	6672	tags=50%, list=12%, signal=57%
GO_DNA_DEPENDENT_ATPASE_ACTIVITY	GO_DNA_DEPENDENT_ATPASE_ACTIVITY	Details ...	108	0.608338	1.78097	0.0179641	0.0618516	0.495	5164	tags=49%, list=9%, signal=54%
GO_CYCLIN_DEPENDENT_PROTEIN_SERINE_THREONINE_KINASE_REGULATOR_ACTIVITY	GO_CYCLIN_DEPENDENT_PROTEIN_SERINE_THREONINE_KINASE_REGULATOR_ACTIVITY	Details ...	49	0.53209	1.77072	0.00610998	0.06717	0.519	5041	tags=39%, list=9%, signal=43%
GO_PHOSPHATIDYLINOSITOL_MONOPHOSPHATE_PHOSPHATASE_ACTIVITY	GO_PHOSPHATIDYLINOSITOL_MONOPHOSPHATE_PHOSPHATASE_ACTIVITY	Details ...	18	0.750091	1.76943	0.00408163	0.0662139	0.526	6829	tags=83%, list=12%, signal=95%
GO_PHOSPHATIDYLINOSITOL_PHOSPHATE_KINASE_ACTIVITY	GO_PHOSPHATIDYLINOSITOL_PHOSPHATE_KINASE_ACTIVITY	Details ...	16	0.69957	1.76937	0.00408163	0.0641676	0.526	5001	tags=44%, list=9%, signal=48%
GO_OMEGA_PEPTIDASE_ACTIVITY	GO_OMEGA_PEPTIDASE_ACTIVITY	Details ...	128	0.528807	1.76204	0.0100604	0.067515	0.545	6447	tags=38%, list=12%, signal=43%
GO_PHOSPHATASE_BINDING	GO_PHOSPHATASE_BINDING	Details ...	194	0.462987	1.75807	0.00816326	0.0679991	0.55	5991	tags=37%, list=11%, signal=41%
GO_PROTEIN_PHOSPHATASE_BINDING	GO_PROTEIN_PHOSPHATASE_BINDING	Details ...	149	0.469728	1.75674	0.00796813	0.0669587	0.551	5648	tags=36%, list=10%, signal=40%
GO_TELOMERIC_DNA_BINDING	GO_TELOMERIC_DNA_BINDING	Details ...	36	0.625453	1.75544	0.011976	0.066042	0.553	5204	tags=50%, list=9%, signal=55%
GO_POLY_A_BINDING	GO_POLY_A_BINDING	Details ...	23	0.656299	1.75161	0.00792079	0.0665135	0.562	8297	tags=61%, list=15%, signal=72%
GO_DNA_HELICASE_ACTIVITY	GO_DNA_HELICASE_ACTIVITY	Details ...	78	0.600915	1.74563	0.0221328	0.0692877	0.58	5164	tags=50%, list=9%, signal=55%
GO_DNA_SECONDARY_STRUCTURE_BINDING	GO_DNA_SECONDARY_STRUCTURE_BINDING	Details ...	33	0.607539	1.74512	0.0104603	0.0677272	0.581	3488	tags=42%, list=6%, signal=45%
GO_NUCLEAR_RECEPTOR_TRANSCRIPTION_COACTIVATOR_ACTIVITY	GO_NUCLEAR_RECEPTOR_TRANSCRIPTION_COACTIVATOR_ACTIVITY	Details ...	54	0.568372	1.74494	0.0119522	0.0661202	0.581	6544	tags=50%, list=12%, signal=57%
GO_POLY_PURINE_TRACT_BINDING	GO_POLY_PURINE_TRACT_BINDING	Details ...	29	0.642822	1.74358	0.00407332	0.0655473	0.585	8297	tags=59%, list=15%, signal=69%
GO_DOUBLE_STRANDED_RNA_BINDING	GO_DOUBLE_STRANDED_RNA_BINDING	Details ...	76	0.578822	1.74306	0.0186722	0.0642428	0.587	4752	tags=42%, list=9%, signal=46%
GO_PROTEIN_C_TERMINUS_BINDING	GO_PROTEIN_C_TERMINUS_BINDING	Details ...	188	0.470054	1.74234	0.00408998	0.063131	0.588	5370	tags=37%, list=10%, signal=41%
GO_TRANSCRIPTION_COACTIVATOR_ACTIVITY	GO_TRANSCRIPTION_COACTIVATOR_ACTIVITY	Details ...	265	0.485573	1.74207	0.00609756	0.0619355	0.589	5361	tags=38%, list=10%, signal=42%
GO_HELICASE_ACTIVITY	GO_HELICASE_ACTIVITY	Details ...	160	0.559975	1.73737	0.024	0.0635193	0.604	5508	tags=46%, list=10%, signal=51%
GO_SEQUENCE_SPECIFIC_SINGLE_STRANDED_DNA_BINDING	GO_SEQUENCE_SPECIFIC_SINGLE_STRANDED_DNA_BINDING	Details ...	15	0.698636	1.72561	0.020284	0.0703028	0.63	6641	tags=60%, list=12%, signal=68%
GO_LYS48_SPECIFIC_DEUBIQUITINASE_ACTIVITY	GO_LYS48_SPECIFIC_DEUBIQUITINASE_ACTIVITY	Details ...	17	0.702202	1.72512	0.00583658	0.0691543	0.632	6399	tags=65%, list=12%, signal=73%
GO_CORE_PROMOTER_SEQUENCE_SPECIFIC_DNA_BINDING	GO_CORE_PROMOTER_SEQUENCE_SPECIFIC_DNA_BINDING	Details ...	42	0.563169	1.72381	0.012	0.0687275	0.637	4934	tags=43%, list=9%, signal=47%
GO_PHOSPHOLIPID_BINDING	GO_PHOSPHOLIPID_BINDING	Details ...	449	0.434853	1.72045	0.00613497	0.0692252	0.647	5657	tags=32%, list=10%, signal=35%
GO_3_5_DNA_HELICASE_ACTIVITY	GO_3_5_DNA_HELICASE_ACTIVITY	Details ...	19	0.706757	1.7185	0.00801603	0.0692551	0.651	5164	tags=68%, list=9%, signal=75%
GO_MYOSIN_BINDING	GO_MYOSIN_BINDING	Details ...	72	0.48721	1.70947	0.00594059	0.0741766	0.671	6635	tags=38%, list=12%, signal=43%
GO_PROTEIN_TYROSINE_KINASE_BINDING	GO_PROTEIN_TYROSINE_KINASE_BINDING	Details ...	98	0.469648	1.70934	0.00616016	0.0728703	0.671	4299	tags=33%, list=8%, signal=35%
GO_UBIQUITIN_LIKE_PROTEIN_TRANSFERASE_ACTIVITY	GO_UBIQUITIN_LIKE_PROTEIN_TRANSFERASE_ACTIVITY	Details ...	448	0.469228	1.70926	0.00612245	0.071582	0.672	6799	tags=40%, list=12%, signal=45%
GO_RNA_POLYMERASE_II_SPECIFIC_DNA_BINDING_TRANSCRIPTION_FACTOR_BINDING	GO_RNA_POLYMERASE_II_SPECIFIC_DNA_BINDING_TRANSCRIPTION_FACTOR_BINDING	Details ...	267	0.459166	1.7046	0.0101833	0.0739204	0.69	6591	tags=40%, list=12%, signal=45%
GO_SUMO_BINDING	GO_SUMO_BINDING	Details ...	15	0.726709	1.70153	0.00823045	0.0747452	0.696	5199	tags=60%, list=9%, signal=66%
GO_RAL_GTPASE_BINDING	GO_RAL_GTPASE_BINDING	Details ...	15	0.655966	1.69757	0.0120968	0.0760369	0.706	6073	tags=73%, list=11%, signal=82%
GO_INSULIN_RECEPTOR_BINDING	GO_INSULIN_RECEPTOR_BINDING	Details ...	23	0.628745	1.69246	0.0220884	0.0780973	0.716	3482	tags=39%, list=6%, signal=42%
GO_HEPARAN_SULFATE_PROTEOGLYCAN_BINDING	GO_HEPARAN_SULFATE_PROTEOGLYCAN_BINDING	Details ...	16	0.688131	1.69133	0.0230769	0.077346	0.716	6521	tags=56%, list=12%, signal=64%
GO_TRANSCRIPTION_COREGULATOR_ACTIVITY	GO_TRANSCRIPTION_COREGULATOR_ACTIVITY	Details ...	493	0.46049	1.68957	0.00998004	0.0773303	0.72	5538	tags=36%, list=10%, signal=39%
GO_NUCLEOSOMAL_DNA_BINDING	GO_NUCLEOSOMAL_DNA_BINDING	Details ...	24	0.645456	1.68932	0.0295276	0.0762944	0.72	2232	tags=42%, list=4%, signal=43%
GO_LYSINE_ACETYLATED_HISTONE_BINDING	GO_LYSINE_ACETYLATED_HISTONE_BINDING	Details ...	22	0.677725	1.68883	0.0191939	0.0753443	0.72	5701	tags=59%, list=10%, signal=66%
GO_GTP_RHO_BINDING	GO_GTP_RHO_BINDING	Details ...	22	0.591846	1.68803	0.0138889	0.0746875	0.721	5572	tags=50%, list=10%, signal=56%
GO_DISORDERED_DOMAIN_SPECIFIC_BINDING	GO_DISORDERED_DOMAIN_SPECIFIC_BINDING	Details ...	35	0.560297	1.68759	0.0196464	0.0737972	0.723	4139	tags=37%, list=7%, signal=40%
GO_LIPASE_INHIBITOR_ACTIVITY	GO_LIPASE_INHIBITOR_ACTIVITY	Details ...	18	0.655135	1.68709	0.00575816	0.0731288	0.724	4322	tags=33%, list=8%, signal=36%
GO_METHYLATED_HISTONE_BINDING	GO_METHYLATED_HISTONE_BINDING	Details ...	69	0.58425	1.67977	0.0161616	0.0767676	0.738	7707	tags=52%, list=14%, signal=61%
GO_PHOSPHATIDYLINOSITOL_BISPHOSPHATE_PHOSPHATASE_ACTIVITY	GO_PHOSPHATIDYLINOSITOL_BISPHOSPHATE_PHOSPHATASE_ACTIVITY	Details ...	23	0.644125	1.67933	0.0201207	0.0759168	0.739	3024	tags=43%, list=5%, signal=46%
GO_RETINOIC_ACID_RECEPTOR_BINDING	GO_RETINOIC_ACID_RECEPTOR_BINDING	Details ...	27	0.570533	1.67736	0.0173745	0.076078	0.74	6548	tags=59%, list=12%, signal=67%
GO_SPHINGOLIPID_BINDING	GO_SPHINGOLIPID_BINDING	Details ...	24	0.589372	1.67488	0.0200401	0.0766153	0.744	5341	tags=42%, list=10%, signal=46%
GO_TRANSFERASE_ACTIVITY_TRANSFERRING_PENTOSYL_GROUPS	GO_TRANSFERASE_ACTIVITY_TRANSFERRING_PENTOSYL_GROUPS	Details ...	48	0.485012	1.67395	0.0121704	0.0761888	0.745	4064	tags=33%, list=7%, signal=36%
GO_PHOSPHATIDYLINOSITOL_5_PHOSPHATE_BINDING	GO_PHOSPHATIDYLINOSITOL_5_PHOSPHATE_BINDING	Details ...	19	0.603305	1.67201	0.00974659	0.0764114	0.746	5657	tags=53%, list=10%, signal=59%
GO_UBIQUITIN_LIKE_PROTEIN_LIGASE_ACTIVITY	GO_UBIQUITIN_LIKE_PROTEIN_LIGASE_ACTIVITY	Details ...	296	0.457457	1.67125	0.00616016	0.0756979	0.747	6483	tags=38%, list=12%, signal=42%
GO_ACTIN_DEPENDENT_ATPASE_ACTIVITY	GO_ACTIN_DEPENDENT_ATPASE_ACTIVITY	Details ...	24	0.602463	1.67046	0.0229645	0.0752848	0.749	6063	tags=54%, list=11%, signal=61%
GO_E_BOX_BINDING	GO_E_BOX_BINDING	Details ...	50	0.496697	1.66968	0.00803213	0.0746627	0.75	8431	tags=40%, list=15%, signal=47%
GO_RNA_POLYMERASE_II_REPRESSING_TRANSCRIPTION_FACTOR_BINDING	GO_RNA_POLYMERASE_II_REPRESSING_TRANSCRIPTION_FACTOR_BINDING	Details ...	35	0.577002	1.65917	0.0203252	0.080204	0.759	5617	tags=49%, list=10%, signal=54%
GO_THYROID_HORMONE_RECEPTOR_BINDING	GO_THYROID_HORMONE_RECEPTOR_BINDING	Details ...	30	0.583916	1.65859	0.02	0.0795863	0.759	7050	tags=53%, list=13%, signal=61%
GO_EPIDERMAL_GROWTH_FACTOR_RECEPTOR_BINDING	GO_EPIDERMAL_GROWTH_FACTOR_RECEPTOR_BINDING	Details ...	34	0.534305	1.65567	0.0239521	0.0807474	0.768	6357	tags=38%, list=12%, signal=43%
GO_MAP_KINASE_KINASE_ACTIVITY	GO_MAP_KINASE_KINASE_ACTIVITY	Details ...	18	0.59047	1.65367	0.0239044	0.081149	0.772	4256	tags=44%, list=8%, signal=48%
GO_RNA_CAP_BINDING	GO_RNA_CAP_BINDING	Details ...	19	0.623956	1.65332	0.0227743	0.0803484	0.772	7983	tags=53%, list=14%, signal=61%
GO_BETA_CATENIN_BINDING	GO_BETA_CATENIN_BINDING	Details ...	85	0.524647	1.64867	0.0250965	0.0823122	0.781	6020	tags=41%, list=11%, signal=46%
GO_MAP_KINASE_KINASE_KINASE_ACTIVITY	GO_MAP_KINASE_KINASE_KINASE_ACTIVITY	Details ...	24	0.60665	1.64741	0.0301205	0.0820528	0.782	6859	tags=54%, list=12%, signal=62%
GO_MITOGEN_ACTIVATED_PROTEIN_KINASE_BINDING	GO_MITOGEN_ACTIVATED_PROTEIN_KINASE_BINDING	Details ...	32	0.580452	1.64293	0.0410678	0.0840743	0.79	4658	tags=41%, list=8%, signal=44%
GO_PROTEIN_SERINE_THREONINE_KINASE_ACTIVATOR_ACTIVITY	GO_PROTEIN_SERINE_THREONINE_KINASE_ACTIVATOR_ACTIVITY	Details ...	38	0.550773	1.64063	0.0145833	0.0848353	0.799	5258	tags=39%, list=10%, signal=44%
GO_MAGNESIUM_ION_TRANSMEMBRANE_TRANSPORTER_ACTIVITY	GO_MAGNESIUM_ION_TRANSMEMBRANE_TRANSPORTER_ACTIVITY	Details ...	16	0.685171	1.64019	0.0254777	0.0842756	0.802	4146	tags=50%, list=8%, signal=54%
GO_TRANSCRIPTION_COFACTOR_BINDING	GO_TRANSCRIPTION_COFACTOR_BINDING	Details ...	51	0.501504	1.63957	0.0211946	0.0835593	0.804	5274	tags=45%, list=10%, signal=50%
GO_TRANSCRIPTION_COREPRESSOR_ACTIVITY	GO_TRANSCRIPTION_COREPRESSOR_ACTIVITY	Details ...	191	0.462826	1.63919	0.019802	0.0828102	0.805	4050	tags=31%, list=7%, signal=33%
GO_INHIBITORY_EXTRACELLULAR_LIGAND_GATED_ION_CHANNEL_ACTIVITY	GO_INHIBITORY_EXTRACELLULAR_LIGAND_GATED_ION_CHANNEL_ACTIVITY	Details ...	15	0.612926	1.63907	0.0118812	0.0819037	0.805	2091	tags=27%, list=4%, signal=28%
GO_UBIQUITIN_LIKE_PROTEIN_BINDING	GO_UBIQUITIN_LIKE_PROTEIN_BINDING	Details ...	92	0.481354	1.63881	0.0263158	0.0811528	0.805	5250	tags=38%, list=9%, signal=42%
GO_MICROFILAMENT_MOTOR_ACTIVITY	GO_MICROFILAMENT_MOTOR_ACTIVITY	Details ...	29	0.589443	1.63637	0.0292887	0.081861	0.809	6063	tags=45%, list=11%, signal=50%
GO_HISTONE_DEACETYLASE_BINDING	GO_HISTONE_DEACETYLASE_BINDING	Details ...	114	0.453666	1.63548	0.0134357	0.0814865	0.809	6730	tags=36%, list=12%, signal=41%
GO_TRANSMEMBRANE_RECEPTOR_PROTEIN_TYROSINE_KINASE_ACTIVITY	GO_TRANSMEMBRANE_RECEPTOR_PROTEIN_TYROSINE_KINASE_ACTIVITY	Details ...	61	0.507572	1.63453	0.00978474	0.0812693	0.811	3999	tags=33%, list=7%, signal=35%
GO_NUCLEOSOME_BINDING	GO_NUCLEOSOME_BINDING	Details ...	53	0.575896	1.63409	0.0223577	0.0808066	0.814	7529	tags=53%, list=14%, signal=61%
GO_TRANSMEMBRANE_RECEPTOR_PROTEIN_KINASE_ACTIVITY	GO_TRANSMEMBRANE_RECEPTOR_PROTEIN_KINASE_ACTIVITY	Details ...	80	0.501979	1.63144	0.00974659	0.0815409	0.821	3999	tags=31%, list=7%, signal=34%
GO_K63_LINKED_POLYUBIQUITIN_MODIFICATION_DEPENDENT_PROTEIN_BINDING	GO_K63_LINKED_POLYUBIQUITIN_MODIFICATION_DEPENDENT_PROTEIN_BINDING	Details ...	21	0.629737	1.62936	0.0247423	0.0819209	0.821	4177	tags=48%, list=8%, signal=51%
GO_PHOSPHOTRANSFERASE_ACTIVITY_FOR_OTHER_SUBSTITUTED_PHOSPHATE_GROUPS	GO_PHOSPHOTRANSFERASE_ACTIVITY_FOR_OTHER_SUBSTITUTED_PHOSPHATE_GROUPS	Details ...	19	0.649111	1.62704	0.0208333	0.0826423	0.826	2351	tags=37%, list=4%, signal=38%
GO_PEPTIDASE_ACTIVATOR_ACTIVITY	GO_PEPTIDASE_ACTIVATOR_ACTIVITY	Details ...	40	0.494143	1.6265	0.0307377	0.0821039	0.827	3013	tags=28%, list=5%, signal=29%
GO_FIBRONECTIN_BINDING	GO_FIBRONECTIN_BINDING	Details ...	26	0.584387	1.62472	0.034	0.0824431	0.83	6178	tags=38%, list=11%, signal=43%
GO_CELL_ADHESION_MEDIATOR_ACTIVITY	GO_CELL_ADHESION_MEDIATOR_ACTIVITY	Details ...	60	0.506749	1.62351	0.0305927	0.0823065	0.83	4510	tags=35%, list=8%, signal=38%
GO_INTERLEUKIN_1_RECEPTOR_BINDING	GO_INTERLEUKIN_1_RECEPTOR_BINDING	Details ...	16	0.644971	1.6228	0.0292969	0.0820712	0.831	5978	tags=44%, list=11%, signal=49%
GO_SH3_DOMAIN_BINDING	GO_SH3_DOMAIN_BINDING	Details ...	131	0.46006	1.62186	0.0240964	0.0818711	0.832	5704	tags=38%, list=10%, signal=42%
GO_N_ACYLTRANSFERASE_ACTIVITY	GO_N_ACYLTRANSFERASE_ACTIVITY	Details ...	101	0.490974	1.62097	0.0350515	0.081547	0.832	8007	tags=46%, list=14%, signal=53%
GO_TELOMERASE_RNA_BINDING	GO_TELOMERASE_RNA_BINDING		22	0.595151	1.61757	0.0425963	0.0831466	0.839	5365	tags=55%, list=10%, signal=60%
GO_RAB_GTPASE_BINDING	GO_RAB_GTPASE_BINDING		170	0.475473	1.61473	0.0365112	0.0844413	0.849	5734	tags=37%, list=10%, signal=41%
GO_TRANSLATION_REPRESSOR_ACTIVITY	GO_TRANSLATION_REPRESSOR_ACTIVITY		26	0.545664	1.6107	0.0329897	0.0864771	0.853	7718	tags=54%, list=14%, signal=63%
GO_UBIQUITIN_LIKE_PROTEIN_LIGASE_BINDING	GO_UBIQUITIN_LIKE_PROTEIN_LIGASE_BINDING		314	0.427466	1.61063	0.0191489	0.0857134	0.853	5316	tags=33%, list=10%, signal=37%
GO_KINASE_REGULATOR_ACTIVITY	GO_KINASE_REGULATOR_ACTIVITY		210	0.418923	1.6097	0.0168067	0.0855651	0.856	5412	tags=30%, list=10%, signal=34%
GO_DNA_BINDING_TRANSCRIPTION_FACTOR_BINDING	GO_DNA_BINDING_TRANSCRIPTION_FACTOR_BINDING		346	0.424677	1.60784	0.0161616	0.0859902	0.858	6591	tags=36%, list=12%, signal=41%
GO_PHOSPHATIDYLINOSITOL_4_5_BISPHOSPHATE_BINDING	GO_PHOSPHATIDYLINOSITOL_4_5_BISPHOSPHATE_BINDING		81	0.430799	1.60652	0.00787402	0.0859613	0.858	7351	tags=40%, list=13%, signal=46%
GO_PROMOTER_SPECIFIC_CHROMATIN_BINDING	GO_PROMOTER_SPECIFIC_CHROMATIN_BINDING		57	0.499501	1.60644	0.0367347	0.0852565	0.858	6724	tags=46%, list=12%, signal=52%
GO_REPRESSING_TRANSCRIPTION_FACTOR_BINDING	GO_REPRESSING_TRANSCRIPTION_FACTOR_BINDING		73	0.510626	1.60617	0.0227273	0.084738	0.859	6058	tags=41%, list=11%, signal=46%
GO_PHOSPHATIDYLINOSITOL_3_5_BISPHOSPHATE_BINDING	GO_PHOSPHATIDYLINOSITOL_3_5_BISPHOSPHATE_BINDING		28	0.511546	1.60355	0.019802	0.0838369	0.866	2352	tags=29%, list=4%, signal=30%
GO_N_ACETYLTRANSFERASE_ACTIVITY	GO_N_ACETYLTRANSFERASE_ACTIVITY		84	0.51489	1.5983	0.0411523	0.0868831	0.872	8007	tags=49%, list=14%, signal=57%
GO_ATPASE_ACTIVITY	GO_ATPASE_ACTIVITY		421	0.450518	1.59692	0.043659	0.0871501	0.872	6968	tags=40%, list=13%, signal=46%
GO_PROTEASE_BINDING	GO_PROTEASE_BINDING		136	0.435826	1.59582	0.03	0.0871201	0.873	6316	tags=35%, list=11%, signal=39%
GO_NUCLEAR_HORMONE_RECEPTOR_BINDING	GO_NUCLEAR_HORMONE_RECEPTOR_BINDING		144	0.44985	1.59288	0.0303644	0.0874763	0.876	6548	tags=41%, list=12%, signal=46%
GO_ACTIN_FILAMENT_BINDING	GO_ACTIN_FILAMENT_BINDING		204	0.434589	1.59223	0.0242915	0.08728	0.877	5326	tags=32%, list=10%, signal=35%
GO_EPHRIN_RECEPTOR_BINDING	GO_EPHRIN_RECEPTOR_BINDING		27	0.579981	1.59173	0.0307377	0.08695	0.877	5253	tags=41%, list=10%, signal=45%
GO_GROWTH_FACTOR_RECEPTOR_BINDING	GO_GROWTH_FACTOR_RECEPTOR_BINDING		141	0.430639	1.59093	0.0164271	0.0866732	0.877	6974	tags=33%, list=13%, signal=37%
GO_NF_KAPPAB_BINDING	GO_NF_KAPPAB_BINDING		31	0.513224	1.58935	0.0333988	0.0868386	0.878	3682	tags=35%, list=7%, signal=38%
GO_PHOSPHATIDYLINOSITOL_BISPHOSPHATE_BINDING	GO_PHOSPHATIDYLINOSITOL_BISPHOSPHATE_BINDING		118	0.420342	1.57886	0.0231579	0.0922599	0.894	7351	tags=35%, list=13%, signal=40%
GO_P53_BINDING	GO_P53_BINDING		66	0.490006	1.5778	0.0453649	0.0921671	0.895	6271	tags=39%, list=11%, signal=44%
GO_BHLH_TRANSCRIPTION_FACTOR_BINDING	GO_BHLH_TRANSCRIPTION_FACTOR_BINDING		29	0.523205	1.57339	0.0276134	0.0946088	0.898	3910	tags=38%, list=7%, signal=41%
GO_RECEPTOR_TYROSINE_KINASE_BINDING	GO_RECEPTOR_TYROSINE_KINASE_BINDING		72	0.42901	1.56692	0.0244898	0.096838	0.902	4299	tags=31%, list=8%, signal=33%
GO_RNA_POLYMERASE_II_ACTIVATING_TRANSCRIPTION_FACTOR_BINDING	GO_RNA_POLYMERASE_II_ACTIVATING_TRANSCRIPTION_FACTOR_BINDING		47	0.481836	1.56012	0.0320641	0.0988451	0.912	7190	tags=43%, list=13%, signal=49%
GO_KINASE_ACTIVATOR_ACTIVITY	GO_KINASE_ACTIVATOR_ACTIVITY		89	0.439058	1.542	0.0406504	0.110301	0.925	5258	tags=29%, list=10%, signal=32%
GO_PROTEIN_PHOSPHATASE_2A_BINDING	GO_PROTEIN_PHOSPHATASE_2A_BINDING		32	0.501664	1.54012	0.0438247	0.110878	0.928	5541	tags=44%, list=10%, signal=49%
GO_ACTIN_BINDING	GO_ACTIN_BINDING		434	0.404909	1.53092	0.0495049	0.116373	0.932	6200	tags=31%, list=11%, signal=35%
GO_ION_CHANNEL_BINDING	GO_ION_CHANNEL_BINDING		132	0.393778	1.53077	0.015748	0.115672	0.933	3873	tags=27%, list=7%, signal=29%
GO_CYSTEINE_TYPE_ENDOPEPTIDASE_ACTIVITY	GO_CYSTEINE_TYPE_ENDOPEPTIDASE_ACTIVITY		114	0.443812	1.52444	0.044586	0.118282	0.934	6447	tags=31%, list=12%, signal=35%
GO_CYCLIN_DEPENDENT_PROTEIN_KINASE_ACTIVITY	GO_CYCLIN_DEPENDENT_PROTEIN_KINASE_ACTIVITY		29	0.506718	1.51953	0.048583	0.118289	0.937	5212	tags=41%, list=9%, signal=46%
GO_HORMONE_RECEPTOR_BINDING	GO_HORMONE_RECEPTOR_BINDING		177	0.4024	1.51804	0.0385396	0.118581	0.939	6548	tags=36%, list=12%, signal=40%
GO_NADPLUS_ADP_RIBOSYLTRANSFERASE_ACTIVITY	GO_NADPLUS_ADP_RIBOSYLTRANSFERASE_ACTIVITY		24	0.50915	1.51736	0.038	0.118436	0.941	2404	tags=29%, list=4%, signal=30%
GO_CALMODULIN_BINDING	GO_CALMODULIN_BINDING		200	0.395642	1.50228	0.026749	0.123908	0.95	6063	tags=31%, list=11%, signal=35%
GO_ATPASE_BINDING	GO_ATPASE_BINDING		88	0.392798	1.48114	0.0301205	0.135619	0.962	5003	tags=31%, list=9%, signal=34%
GO_MICROTUBULE_BINDING	GO_MICROTUBULE_BINDING		264	0.39702	1.47067	0.046	0.135862	0.965	5793	tags=32%, list=10%, signal=36%

## Sheet: KEGG
NAME	SIZE	ES	NES	NOM p-val	FDR q-val	FWER p-val	RANK AT MAX	LEADING EDGE
ADHERENS_JUNCTION	73	0.655806	1.95119	0	0.0895882	0.055	6454	tags=55%, list=12%, signal=62%
ERBB_SIGNALING_PATHWAY	87	0.534767	1.81509	0.0056926	0.242298	0.184	5041	tags=43%, list=9%, signal=47%
TIGHT_JUNCTION	132	0.48737	1.78081	0.0056926	0.223895	0.236	6516	tags=39%, list=12%, signal=45%
REGULATION_OF_ACTIN_CYTOSKELETON	213	0.455819	1.65277	0.0198807	0.213021	0.48	6630	tags=36%, list=12%, signal=40%
FOCAL_ADHESION	199	0.484319	1.65158	0.0273438	0.194666	0.481	4461	tags=32%, list=8%, signal=35%
RENAL_CELL_CARCINOMA	70	0.488612	1.62773	0.025641	0.183374	0.536	5163	tags=40%, list=9%, signal=44%
NOTCH_SIGNALING_PATHWAY	47	0.497723	1.60316	0.0321285	0.188783	0.581	6548	tags=45%, list=12%, signal=51%
ENDOMETRIAL_CANCER	52	0.517647	1.59611	0.034749	0.176443	0.592	5931	tags=42%, list=11%, signal=47%
UBIQUITIN_MEDIATED_PROTEOLYSIS	134	0.494453	1.5899	0.0277228	0.173936	0.608	5586	tags=42%, list=10%, signal=46%
GLIOMA	65	0.466814	1.56669	0.0346154	0.175234	0.657	4682	tags=29%, list=8%, signal=32%
PATHWAYS_IN_CANCER	325	0.428106	1.56166	0.0337302	0.172897	0.669	5700	tags=34%, list=10%, signal=38%
PROSTATE_CANCER	89	0.464656	1.54118	0.0452756	0.161319	0.702	4176	tags=33%, list=8%, signal=35%
THYROID_CANCER	29	0.488943	1.49545	0.0465116	0.168749	0.762	4176	tags=41%, list=8%, signal=45%
